# Supplementary material for: Research on the Overtopping‐Induced Breaching Mechanism of Tailings Dam and Its Numerical Simulation
Source: Hindawi journal article supplement (doi:10.1155/2019/3264342), 2019-01-01
Supplement: f1 [file 3264342.f1.xlsx]

## Sheet: fig5,fig10
figure5:	t(h)	Q(m^3/s)		figure 10a	measured data		calculated data			figure 10b	measured data		calculated data
	0	0			t(h)	Q(m^3/s)	t(h)	Q(m^3/s)			t(h)	Q(m^3/s)	t(h)	Q(m^3/s)
	0.014	0.03			0	0	0.00014	0.1562			0	0	0.00014	0.1562
	0.028	0.0075			0.014	0.03	0.00042	0.3691			0.014	1.20035	0.00042	0.3124
	0.042	0.1225			0.028	0.0075	0.00069	0.37			0.028	1.32782	0.00069	0.6239
	0.056	2.5075			0.042	0.1225	0.00097	0.3709			0.042	1.94755	0.00097	0.8363
	0.07	14.2275			0.056	2.5075	0.00125	0.3718			0.056	2.08018	0.00125	1.2045
	0.084	16.04			0.07	14.2275	0.00153	0.3727			0.07	2.52942	0.03319	2.8742
	0.098	16.5525			0.084	16.04	0.00181	0.3736			0.084	3.51241	0.03347	2.882
	0.112	21.885			0.098	16.5525	0.00208	0.3745			0.098	3.88451	0.03375	2.8899
	0.126	21.605			0.112	21.885	0.00236	0.3754			0.112	3.98688	0.03403	2.8978
	0.14	10.2775			0.126	21.605	0.00264	0.3763			0.126	8.08984	0.03431	3.315
	0.154	6.9725			0.14	10.2775	0.00292	0.3772			0.14	19.0654	0.03458	3.3241
	0.168	7.215			0.154	6.9725	0.00319	0.3781			0.154	17.9199	0.03486	3.3333
	0.182	9.2			0.168	7.215	0.00347	0.379			0.168	15.2587	0.03514	3.3425
	0.196	8.11			0.182	9.2	0.00375	0.3799			0.182	14.4545	0.03542	3.3517
	0.21	10.1675			0.196	8.11	0.00403	0.3809			0.196	13.2707	0.03569	3.361
	0.224	8.4175			0.21	10.1675	0.00431	0.3818			0.21	12.1009	0.03597	3.3703
	0.238	6.59			0.224	8.4175	0.00458	0.3827			0.224	11.824	0.03625	3.3796
	0.252	6.8275			0.238	6.59	0.00486	0.3837			0.238	10.5175	0.03653	3.3889
	0.266	6.54			0.252	6.8275	0.00514	0.3846			0.252	9.75189	0.03681	3.3983
	0.28	7.4575			0.266	6.54	0.00542	0.3855			0.266	8.07557	0.03708	3.4077
	0.294	7.2125			0.28	7.4575	0.00569	0.3865			0.28	7.32903	0.03736	3.4171
	0.308	6.54			0.294	7.2125	0.00597	0.3874			0.294	6.16998	0.03764	3.4265
	0.322	6.0725			0.308	6.54	0.00625	0.3884			0.308	5.60069	0.03792	3.436
	0.336	6.21			0.322	6.0725	0.00653	0.3893			0.322	4.95334	0.03819	3.4455
	0.35	6.2575			0.336	6.21	0.00681	0.3903			0.336	4.88528	0.03847	3.455
	0.364	6.3025			0.35	6.2575	0.00708	0.3912			0.35	5.84811	0.03875	3.4646
	0.378	6.2575			0.364	6.3025	0.00736	0.3922			0.364	7.9	0.03903	3.4742
	0.392	6.0725			0.378	6.2575	0.00764	0.3931			0.378	5.15855	0.03931	3.4838
	0.406	5.98			0.392	6.0725	0.00792	0.3941			0.392	4.74798	0.03958	3.7543
	0.42	6.54			0.406	5.98	0.00819	0.395			0.406	4.70123	0.03986	3.7647
	0.434	5.845			0.42	6.54	0.00847	0.396			0.42	4.66	0.04014	3.7752
	0.448	5.5275			0.434	5.845	0.00875	0.397			0.434	4.61441	0.04042	3.7857
	0.462	5.89			0.448	5.5275	0.00903	0.398			0.448	4.55778	0.04069	3.7962
	0.476	6.3525			0.462	5.89	0.00931	0.3989			0.462	4.5281	0.04097	3.8067
	0.49	6.0725			0.476	6.3525	0.00958	0.3999			0.476	4.46363	0.04125	3.8173
	0.504	6.445			0.49	6.0725	0.00986	0.4009			0.49	4.46065	0.04153	3.828
	0.518	5.71			0.504	6.445	0.01014	0.4019			0.504	5.51738	0.04181	3.8386
	0.532	6.215			0.518	5.71	0.01042	0.4029			0.518	4.24581	0.04208	3.8493
	0.546	5.395			0.532	6.215	0.01069	0.4039			0.532	4.55778	0.04236	3.86
	0.56	5.53			0.546	5.395	0.01097	0.4049			0.546	4.5281	0.04264	3.8707
	0.574	5.355			0.56	5.53	0.01125	0.4058			0.56	4.46363	0.04292	3.8815
	0.588	5.8925			0.574	5.355	0.01153	0.4068			0.574	4.46065	0.04319	3.8923
	0.602	5.5775			0.588	5.8925	0.01181	0.4079			0.588	4.4	0.04347	3.9032
	0.616	6.03			0.602	5.5775	0.01208	0.4089			0.602	4.24581	0.04375	3.914
	0.63	5.94			0.616	6.03	0.01236	0.4099			0.616	4.55778	0.04403	3.925
	0.644	5.895			0.63	5.94	0.01264	0.4109			0.63	4.5281	0.04431	3.9359
	0.658	5.9875			0.644	5.895	0.01292	0.4119			0.644	4.46363	0.04458	3.9469
	0.672	6.125			0.658	5.9875	0.01319	0.4129			0.658	4.46065	0.04486	3.9579
	0.686	6.1725			0.672	6.125	0.01347	0.4139			0.672	4.4	0.04514	3.9689
	0.7	5.8975			0.686	6.1725	0.01375	0.415			0.686	4.24581	0.04542	3.98
	0.714	5.715			0.7	5.8975	0.01403	0.416			0.7	4.55778	0.04569	3.9911
	0.728	5.76			0.714	5.715	0.01431	0.417			0.714	4.5281	0.04597	4.0022
	0.742	5.715			0.728	5.76	0.01458	0.418			0.728	4.46363	0.04625	4.0134
	0.756	5.6275			0.742	5.715	0.01486	0.4191			0.742	4.46065	0.04653	4.0246
	0.77	5.36			0.756	5.6275	0.01514	0.4201			0.756	4.4	0.04681	4.0358
	0.784	5.36			0.77	5.36	0.01542	0.4212			0.77	4.24581	0.04708	4.047
	0.798	5.14			0.784	5.36	0.01569	0.4222			0.784	4.4575	0.04736	4.0583
	0.812	4.8825			0.798	5.14	0.01597	0.4233			0.798	4.6675	0.04764	4.0697
	0.826	5.27			0.812	4.8825	0.01625	0.4243			0.812	4.6675	0.04792	4.081
	0.84	4.5875			0.826	5.27	0.01653	0.4254			0.826	4.4975	0.04819	4.0924
	0.854	4.8375			0.84	4.5875	0.01681	0.4264			0.84	5.3125	0.04847	4.1039
	0.868	4.84			0.854	4.8375	0.01708	0.4275			0.854	5.095	0.04875	4.1153
	0.882	4.5425			0.868	4.84	0.01736	0.4286			0.868	5.445	0.04903	4.6812
	0.896	4.5025			0.882	4.5425	0.01764	0.4296			0.882	5.3125	0.04931	4.6944
	0.91	4.925			0.896	4.5025	0.01792	0.4307			0.896	5.2275	0.04958	4.7076
	0.924	4.7125			0.91	4.925	0.01819	0.4318			0.91	5.27	0.04986	4.7209
	0.938	4.925			0.924	4.7125	0.01847	0.4329			0.924	5.01	0.05014	4.7342
	0.952	4.46			0.938	4.925	0.01875	0.4339			0.938	4.7125	0.05042	4.7475
	0.966	5.2275			0.952	4.46	0.01903	0.435			0.952	5.0075	0.05069	4.7609
	0.98	5.14			0.966	5.2275	0.01931	0.4361			0.966	4.795	0.05097	4.7743
	0.994	4.795			0.98	5.14	0.01958	0.4372			0.98	4.8375	0.05125	4.7878
	1.008	5.01			0.994	4.795	0.01986	0.4383			0.994	4.9225	0.05153	4.8013
	1.022	4.7525			1.008	5.01	0.02014	0.4394			1.008	4.965	0.05181	4.8148
	1.036	5.2275			1.022	4.7525	0.02042	0.4405			1.022	4.6675	0.05208	4.8284
	1.05	5.01			1.036	5.2275	0.02069	0.4416			1.036	4.585	0.05236	4.842
	1.064	4.795			1.05	5.01	0.02097	0.4427			1.05	4.6675	0.05264	4.8557
	1.078	4.795			1.064	4.795	0.02125	0.4438			1.064	4.6675	0.05292	4.8694
	1.092	5.01			1.078	4.795	0.02153	0.445			1.078	5.0075	0.05319	4.8831
	1.106	5.4025			1.092	5.01	0.02181	0.4461			1.092	4.71	0.05347	4.8969
	1.12	5.1825			1.106	5.4025	0.02208	0.4472			1.106	4.58	0.05375	4.9107
	1.134	4.795			1.12	5.1825	0.02236	0.4483			1.12	4.375	0.05403	4.9246
	1.148	5.0525			1.134	4.795	0.02264	0.4495			1.134	4.4575	0.05431	4.9385
	1.162	5.58			1.148	5.0525	0.02292	0.4506			1.148	4.75	0.05458	4.9524
	1.176	5.1375			1.162	5.58	0.02319	0.4517			1.162	4.6675	0.05486	4.9664
	1.19	5.1375			1.176	5.1375	0.02347	0.4529			1.176	4.2525	0.05514	4.9805
	1.204	4.585			1.19	5.1375	0.02375	0.454			1.19	4.75	0.05542	4.9945
	1.218	4.71			1.204	4.585	0.02403	0.4552			1.204	4.05	0.05569	5.0087
	1.232	4.625			1.218	4.71	0.02431	0.4563			1.218	3.7725	0.05597	5.0228
	1.246	4.585			1.232	4.625	0.02458	0.4575			1.232	4.1725	0.05625	5.037
	1.26	4.8375			1.246	4.585	0.02486	0.4586			1.246	4.4975	0.05653	5.0512
	1.274	4.88			1.26	4.8375	0.02514	0.4598			1.26	3.8875	0.05681	5.0655
	1.288	5.715			1.274	4.88	0.02542	0.461			1.274	4.1725	0.05708	5.0799
	1.302	5.095			1.288	5.715	0.02569	0.4621			1.288	4.4575	0.05736	5.0942
	1.316	5.805			1.302	5.095	0.02597	0.4633			1.302	5.535	0.05764	5.1086
	1.33	6.1725			1.316	5.805	0.02625	0.4645			1.316	5.095	0.05792	5.1231
	1.344	5.67			1.33	6.1725	0.02653	0.4657			1.33	5.2275	0.05819	5.1376
	1.358	5.535			1.344	5.67	0.02681	0.4669			1.344	5.27	0.05847	5.1521
	1.372	5.3125			1.358	5.535	0.02708	0.4681			1.358	5.3125	0.05875	5.1667
	1.386	5.9875			1.372	5.3125	0.02736	0.4693			1.372	4.9225	0.05903	5.1813
	1.4	5.895			1.386	5.9875	0.02764	0.4705			1.386	4.585	0.05931	5.196
	1.414	5.76			1.4	5.895	0.02792	0.4717			1.4	5.27	0.05958	5.2107
	1.428	6.2175			1.414	5.76	0.02819	0.4729			1.414	5.095	0.05986	5.2255
	1.442	6.0325			1.428	6.2175	0.02847	0.4741			1.428	5.3125	0.06014	5.2403
	1.456	6.545			1.442	6.0325	0.02875	0.4753			1.442	5.0525	0.06042	6.0045
	1.47	6.4525			1.456	6.545	0.02903	0.4765			1.456	5.3125	0.06069	6.0216
	1.484	6.3575			1.47	6.4525	0.02931	0.4777			1.47	5.225	0.06097	6.0388
	1.498	6.1275			1.484	6.3575	0.02958	0.479			1.484	4.585	0.06125	6.056
	1.512	6.1275			1.498	6.1275	0.02986	0.4802			1.498	5.715	0.06153	6.0732
	1.526	6.545			1.512	6.1275	0.03014	0.4814			1.512	5.2275	0.06181	6.0905
	1.54	5.535			1.526	6.545	0.03042	1.025			1.526	5.3125	0.06208	6.1078
	1.554	5.2275			1.54	5.535	0.03069	1.0279			1.54	4.8375	0.06236	6.1252
	1.568	5.095			1.554	5.2275	0.03097	1.762			1.554	4.71	0.06264	6.1427
	1.582	4.71			1.568	5.095	0.03125	2.3363			1.568	4.8375	0.06292	6.1602
	1.596	5.225			1.582	4.71	0.03153	3.289			1.582	5.1375	0.06319	6.1777
	1.61	5.27			1.596	5.225	0.03181	3.9198			1.596	5.095	0.06347	6.1953
	1.624	5.535			1.61	5.27	0.03208	4.705			1.61	5.095	0.06375	6.2129
	1.638	5.095			1.624	5.535	0.03236	5.7052			1.624	5.225	0.06403	6.2306
	1.652	5.2275			1.638	5.095	0.03264	6.8841			1.638	4.88	0.06431	6.2483
	1.666	5.27			1.652	5.2275	0.03292	8.0444			1.652	4.4575	0.06458	6.2661
	1.68	5.3125			1.666	5.27	0.03319	9.1849			1.666	4.965	0.06486	6.284
	1.694	4.9225			1.68	5.3125	0.03347	9.2167			1.68	4.2925	0.06514	6.3019
	1.708	4.585			1.694	4.9225	0.03375	9.2485			1.694	4.6675	0.06542	6.3198
	1.722	5.27			1.708	4.585	0.03403	10.3122			1.708	4.3325	0.06569	6.3378
	1.736	5.095			1.722	5.27	0.03431	11.4583			1.722	4.17	0.06597	6.3558
	1.75	5.3125			1.736	5.095	0.03458	11.4953			1.736	4.4575	0.06625	6.8817
	1.764	5.0525			1.75	5.3125	0.03486	11.5324			1.75	4.6675	0.06653	6.9012
	1.778	5.3125			1.764	5.0525	0.03514	11.5696			1.764	4.6675	0.06681	6.9208
	1.792	5.225			1.778	5.3125	0.03542	11.6068			1.778	4.4975	0.06708	6.9404
	1.806	4.585			1.792	5.225	0.03569	11.6442			1.792	5.3125	0.06736	6.9601
	1.82	5.715			1.806	4.585	0.03597	11.6815			1.806	5.095	0.06764	6.9798
	1.834	5.2275			1.82	5.715	0.03625	11.719			1.82	5.445	0.06792	6.9996
	1.848	5.3125			1.834	5.2275	0.03653	11.7565			1.834	5.3125	0.06819	7.0194
	1.862	4.8375			1.848	5.3125	0.03681	11.794			1.848	5.2275	0.06847	7.7027
	1.876	4.71			1.862	4.8375	0.03708	11.8317			1.862	5.27	0.06875	7.7243
	1.89	4.8375			1.876	4.71	0.03736	11.8694			1.876	5.01	0.06903	7.7459
	1.904	5.1375			1.89	4.8375	0.03764	11.9072			1.89	4.7125	0.06931	7.7676
	1.918	5.095			1.904	5.1375	0.03792	11.945			1.904	5.0075	0.06958	7.7893
	1.932	5.095			1.918	5.095	0.03819	11.9829			1.918	4.795	0.06986	7.8111
	1.946	5.225			1.932	5.095	0.03847	12.0208			1.932	4.8375	0.07014	7.8329
	1.96	4.88			1.946	5.225	0.03875	12.0589			1.946	4.9225	0.07042	7.8548
	1.974	4.4575			1.96	4.88	0.03903	12.0969			1.96	4.965	0.07069	7.8767
	1.988	4.965			1.974	4.4575	0.03931	12.1351			1.974	4.6675	0.07097	7.8987
	2.002	4.2925			1.988	4.965	0.03958	12.1733			1.988	4.585	0.07125	7.9208
	2.016	4.6675			2.002	4.2925	0.03986	12.2116			2.002	4.6675	0.07153	7.9428
	2.03	4.3325			2.016	4.6675	0.04014	12.2499			2.016	4.6675	0.07181	7.965
	2.044	4.17			2.03	4.3325	0.04042	12.2883			2.03	5.0075	0.07208	7.9872
	2.058	4.4575			2.044	4.17	0.04069	12.3267			2.044	4.71	0.07236	8.0094
	2.072	4.6675			2.058	4.4575	0.04097	12.3652			2.058	4.58	0.07264	8.0317
	2.086	4.6675			2.072	4.6675	0.04125	12.4038			2.072	4.375	0.07292	8.0541
	2.1	4.4975			2.086	4.6675	0.04153	12.4424			2.086	4.4575	0.07319	8.0764
	2.114	5.3125			2.1	4.4975	0.04181	12.4811			2.1	4.75	0.07347	8.0989
	2.128	5.095			2.114	5.3125	0.04208	12.5198			2.114	4.6675	0.07375	8.1214
	2.142	5.445			2.128	5.095	0.04236	12.5586			2.128	4.2525	0.07403	8.1439
	2.156	5.3125			2.142	5.445	0.04264	12.5974			2.142	4.75	0.07431	8.1665
	2.17	5.2275			2.156	5.3125	0.04292	12.6363			2.156	4.05	0.07458	9.4829
	2.184	5.27			2.17	5.2275	0.04319	12.6753			2.17	3.7725	0.07486	9.5081
	2.198	5.01			2.184	5.27	0.04347	12.7143			2.184	4.1725	0.07514	9.5334
	2.212	4.7125			2.198	5.01	0.04375	12.7533			2.198	4.4975	0.07542	9.5587
	2.226	5.0075			2.212	4.7125	0.04403	12.7925			2.212	3.8875	0.07569	9.5841
	2.24	4.795			2.226	5.0075	0.04431	12.8316			2.226	4.1725	0.07597	9.6094
	2.254	4.8375			2.24	4.795	0.04458	12.8708			2.24	4.4575	0.07625	9.6349
	2.268	4.9225			2.254	4.8375	0.04486	12.9101			2.254	4.9225	0.07653	9.6603
	2.282	4.965			2.268	4.9225	0.04514	12.9494			2.268	4.965	0.07681	9.6859
	2.296	4.6675			2.282	4.965	0.04542	12.9888			2.282	4.6675	0.07708	9.7114
	2.31	4.585			2.296	4.6675	0.04569	13.0282			2.296	4.585	0.07736	12.4674
	2.324	4.6675			2.31	4.585	0.04597	13.0677			2.31	4.6675	0.07764	12.5037
	2.338	4.6675			2.324	4.6675	0.04625	13.1072			2.324	4.6675	0.07792	13.1154
	2.352	5.0075			2.338	4.6675	0.04653	13.1467			2.338	5.0075	0.07819	13.151
	2.366	4.71			2.352	5.0075	0.04681	13.1863			2.352	4.71	0.07847	13.1866
	2.38	4.58			2.366	4.71	0.04708	13.226			2.366	4.58	0.07875	13.8881
	2.394	4.375			2.38	4.58	0.04736	13.2657			2.38	4.375	0.07903	13.9226
	2.408	4.4575			2.394	4.375	0.04764	13.3054			2.394	4.4575	0.07931	14.9616
	2.422	4.75			2.408	4.4575	0.04792	13.3452			2.408	4.75	0.07958	14.994
	2.436	4.6675			2.422	4.75	0.04819	13.385			2.422	4.6675	0.07986	15.0264
	2.45	4.2525			2.436	4.6675	0.04847	13.4249			2.436	4.2525	0.08014	15.0586
	2.464	4.75			2.45	4.2525	0.04875	13.4648			2.45	4.75	0.08042	15.0908
	2.478	4.05			2.464	4.75	0.04903	13.5047			2.464	4.05	0.08069	15.1229
	2.492	3.7725			2.478	4.05	0.04931	13.5447			2.478	3.7725	0.08097	15.1549
	2.506	4.1725			2.492	3.7725	0.04958	13.5847			2.492	4.1725	0.08125	15.1868
	2.52	4.4975			2.506	4.1725	0.04986	13.6248			2.506	4.4975	0.08153	15.2187
	2.534	3.8875			2.52	4.4975	0.05014	13.6649			2.52	3.8875	0.08181	15.2504
	2.548	4.1725			2.534	3.8875	0.05042	13.705			2.534	4.1725	0.08208	15.2821
	2.562	4.4575			2.548	4.1725	0.05069	13.7452			2.548	4.4575	0.08236	15.3137
	--	--			2.562	4.4575	0.05097	13.7854			2.562	4.2354	0.08264	15.3452
	--	--			--	--	0.05125	13.8257					0.08292	15.3767
	--	--			--	--	0.05153	13.866					0.08319	15.408
	--	--			--	--	0.05181	13.9063					0.08347	15.4393
	--	--			--	--	0.05208	13.9466					0.08375	15.4704
	--	--			--	--	0.05236	13.987					0.08403	15.5015
	--	--			--	--	0.05264	14.0274					0.08431	15.5325
	--	--			--	--	0.05292	14.0679					0.08458	15.5634
	--	--			--	--	0.05319	14.1084			--	--	0.08486	15.5943
	--	--			--	--	0.05347	14.1489			--	--	0.08514	15.625
	--	--			--	--	0.05375	14.1894			--	--	0.08542	15.6556
	--	--			--	--	0.05403	14.2299			--	--	0.08569	15.6862
	--	--			--	--	0.05431	14.2705			--	--	0.08597	15.7167
	--	--			--	--	0.05458	14.3112			--	--	0.08625	15.747
	--	--			--	--	0.05486	14.3518			--	--	0.08653	15.7773
	--	--			--	--	0.05514	14.3925			--	--	0.08681	15.8075
	--	--			--	--	0.05542	14.4332			--	--	0.08708	15.8376
	--	--			--	--	0.05569	14.4739			--	--	0.08736	15.8676
	--	--			--	--	0.05597	14.5146			--	--	0.08764	15.8975
	--	--			--	--	0.05625	14.5554			--	--	0.08792	15.9273
	--	--			--	--	0.05653	14.5962			--	--	0.08819	15.957
	--	--			--	--	0.05681	14.637			--	--	0.08847	15.9866
	--	--			--	--	0.05708	14.6778			--	--	0.08875	16.0162
	--	--			--	--	0.05736	14.7187			--	--	0.08903	16.0456
	--	--			--	--	0.05764	14.7596			--	--	0.08931	16.0749
	--	--			--	--	0.05792	14.8004			--	--	0.08958	16.1041
	--	--			--	--	0.05819	14.8413			--	--	0.08986	16.1333
	--	--			--	--	0.05847	14.8822			--	--	0.09014	16.1623
	--	--			--	--	0.05875	14.9232			--	--	0.09042	16.1912
	--	--			--	--	0.05903	14.9641			--	--	0.09069	16.22
	--	--			--	--	0.05931	15.0051			--	--	0.09097	16.2488
	--	--			--	--	0.05958	15.046			--	--	0.09125	16.2774
	--	--			--	--	0.05986	15.087			--	--	0.09153	16.3059
	--	--			--	--	0.06014	15.128			--	--	0.09181	16.3344
	--	--			--	--	0.06042	15.169			--	--	0.09208	16.3627
	--	--			--	--	0.06069	15.21			--	--	0.09236	16.3909
	--	--			--	--	0.06097	15.251			--	--	0.09264	16.419
	--	--			--	--	0.06125	15.292			--	--	0.09292	16.447
	--	--			--	--	0.06153	15.3331			--	--	0.09319	16.4749
	--	--			--	--	0.06181	15.3741			--	--	0.09347	16.5027
	--	--			--	--	0.06208	15.4152			--	--	0.09375	16.5304
	--	--			--	--	0.06236	15.4562			--	--	0.09403	16.558
	--	--			--	--	0.06264	15.4973			--	--	0.09431	16.5855
	--	--			--	--	0.06292	15.5383			--	--	0.09458	16.6129
	--	--			--	--	0.06319	15.5794			--	--	0.09486	16.6402
	--	--			--	--	0.06347	15.6204			--	--	0.09514	16.6673
	--	--			--	--	0.06375	15.6615			--	--	0.09542	16.6944
	--	--			--	--	0.06403	15.7025			--	--	0.09569	16.7213
	--	--			--	--	0.06431	15.7436			--	--	0.09597	16.7482
	--	--			--	--	0.06458	15.7846			--	--	0.09625	16.7749
	--	--			--	--	0.06486	15.8256			--	--	0.09653	16.8015
	--	--			--	--	0.06514	15.8666			--	--	0.09681	16.828
	--	--			--	--	0.06542	15.9115			--	--	0.09708	16.8544
	--	--			--	--	0.06569	15.962			--	--	0.09736	16.8807
	--	--			--	--	0.06597	16.0139			--	--	0.09764	16.9069
	--	--			--	--	0.06625	16.0658			--	--	0.09792	16.933
	--	--			--	--	0.06653	16.1175			--	--	0.09819	16.9589
	--	--			--	--	0.06681	16.1692			--	--	0.09847	16.9848
	--	--			--	--	0.06708	16.2207			--	--	0.09875	17.0105
	--	--			--	--	0.06736	16.2722			--	--	0.09903	17.0361
	--	--			--	--	0.06764	16.3235			--	--	0.09931	17.0616
	--	--			--	--	0.06792	16.3747			--	--	0.09958	17.087
	--	--			--	--	0.06819	16.4259			--	--	0.09986	17.1123
	--	--			--	--	0.06847	16.4769			--	--	0.10014	17.1375
	--	--			--	--	0.06875	16.5278			--	--	0.10042	17.1625
	--	--			--	--	0.06903	16.5786			--	--	0.10069	17.1875
	--	--			--	--	0.06931	16.6293			--	--	0.10097	17.2123
	--	--			--	--	0.06958	16.6798			--	--	0.10125	17.237
	--	--			--	--	0.06986	16.7303			--	--	0.10153	17.2616
	--	--			--	--	0.07014	16.7806			--	--	0.10181	17.286
	--	--			--	--	0.07042	16.8308			--	--	0.10208	17.3104
	--	--			--	--	0.07069	16.8809			--	--	0.10236	17.3346
	--	--			--	--	0.07097	16.9309			--	--	0.10264	17.3587
	--	--			--	--	0.07125	16.9808			--	--	0.10292	17.3827
	--	--			--	--	0.07153	17.0305			--	--	0.10319	17.4066
	--	--			--	--	0.07181	17.0801			--	--	0.10347	17.4304
	--	--			--	--	0.07208	17.1296			--	--	0.10375	17.454
	--	--			--	--	0.07236	17.179			--	--	0.10403	17.4775
	--	--			--	--	0.07264	17.2282			--	--	0.10431	17.5009
	--	--			--	--	0.07292	17.2773			--	--	0.10458	17.5242
	--	--			--	--	0.07319	17.3262			--	--	0.10486	17.5474
	--	--			--	--	0.07347	17.3751			--	--	0.10514	17.5704
	--	--			--	--	0.07375	17.4238			--	--	0.10542	17.5933
	--	--			--	--	0.07403	17.4723			--	--	0.10569	17.6161
	--	--			--	--	0.07431	17.5208			--	--	0.10597	17.6388
	--	--			--	--	0.07458	17.5691			--	--	0.10625	17.6614
	--	--			--	--	0.07486	17.6173			--	--	0.10653	17.6838
	--	--			--	--	0.07514	17.6653			--	--	0.10681	17.7061
	--	--			--	--	0.07542	17.7131			--	--	0.10708	17.7283
	--	--			--	--	0.07569	17.7609			--	--	0.10736	17.7504
	--	--			--	--	0.07597	17.8085			--	--	0.10764	17.7723
	--	--			--	--	0.07625	17.856			--	--	0.10792	17.7941
	--	--			--	--	0.07653	17.9033			--	--	0.10819	17.8158
	--	--			--	--	0.07681	17.9504			--	--	0.10847	17.8374
	--	--			--	--	0.07708	17.9974			--	--	0.10875	17.8589
	--	--			--	--	0.07736	18.0443			--	--	0.10903	17.8802
	--	--			--	--	0.07764	18.091			--	--	0.10931	17.9014
	--	--			--	--	0.07792	18.1376			--	--	0.10958	17.9224
	--	--			--	--	0.07819	18.184			--	--	0.10986	17.9434
	--	--			--	--	0.07847	18.2303			--	--	0.11014	17.9642
	--	--			--	--	0.07875	18.2764			--	--	0.11042	17.9849
	--	--			--	--	0.07903	18.3224			--	--	0.11069	18.0055
	--	--			--	--	0.07931	18.3682			--	--	0.11097	18.0259
	--	--			--	--	0.07958	18.4138			--	--	0.11125	18.0462
	--	--			--	--	0.07986	18.4593			--	--	0.11153	18.0664
	--	--			--	--	0.08014	18.5046			--	--	0.11181	18.0865
	--	--			--	--	0.08042	18.5498			--	--	0.11208	18.1064
	--	--			--	--	0.08069	18.5948			--	--	0.11236	18.1263
	--	--			--	--	0.08097	18.6396			--	--	0.11264	18.1459
	--	--			--	--	0.08125	18.6843			--	--	0.11292	18.1655
	--	--			--	--	0.08153	18.7288			--	--	0.11319	18.1849
	--	--			--	--	0.08181	18.7732			--	--	0.11347	18.2042
	--	--			--	--	0.08208	18.8174			--	--	0.11375	18.2234
	--	--			--	--	0.08236	18.8614			--	--	0.11403	18.2424
	--	--			--	--	0.08264	18.9052			--	--	0.11431	18.2613
	--	--			--	--	0.08292	18.9489			--	--	0.11458	18.2801
	--	--			--	--	0.08319	18.9924			--	--	0.11486	18.2988
	--	--			--	--	0.08347	19.0357			--	--	0.11514	18.3173
	--	--			--	--	0.08375	19.0788			--	--	0.11542	18.3357
	--	--			--	--	0.08403	19.1218			--	--	0.11569	18.354
	--	--			--	--	0.08431	19.1646			--	--	0.11597	18.3721
	--	--			--	--	0.08458	19.2072			--	--	0.11625	18.3901
	--	--			--	--	0.08486	19.2497			--	--	0.11653	18.408
	--	--			--	--	0.08514	19.292			--	--	0.11681	18.4258
	--	--			--	--	0.08542	19.3341			--	--	0.11708	18.4434
	--	--			--	--	0.08569	19.376			--	--	0.11736	18.4609
	--	--			--	--	0.08597	19.4177			--	--	0.11764	18.4783
	--	--			--	--	0.08625	19.4593			--	--	0.11792	18.4955
	--	--			--	--	0.08653	19.5006			--	--	0.11819	18.5126
	--	--			--	--	0.08681	19.5418			--	--	0.11847	18.5296
	--	--			--	--	0.08708	19.5828			--	--	0.11875	18.5464
	--	--			--	--	0.08736	19.6236			--	--	0.11903	18.5631
	--	--			--	--	0.08764	19.6642			--	--	0.11931	18.5797
	--	--			--	--	0.08792	19.7047			--	--	0.11958	18.5961
	--	--			--	--	0.08819	19.745			--	--	0.11986	18.6125
	--	--			--	--	0.08847	19.785			--	--	0.12014	18.6287
	--	--			--	--	0.08875	19.8249			--	--	0.12042	18.6447
	--	--			--	--	0.08903	19.8646			--	--	0.12069	18.6607
	--	--			--	--	0.08931	19.9041			--	--	0.12097	18.6765
	--	--			--	--	0.08958	19.9434			--	--	0.12125	18.6921
	--	--			--	--	0.08986	19.9825			--	--	0.12153	18.7077
	--	--			--	--	0.09014	20.0214			--	--	0.12181	18.7231
	--	--			--	--	0.09042	20.0601			--	--	0.12208	18.7384
	--	--			--	--	0.09069	20.0987			--	--	0.12236	18.7535
	--	--			--	--	0.09097	20.137			--	--	0.12264	18.7685
	--	--			--	--	0.09125	20.1751			--	--	0.12292	18.7834
	--	--			--	--	0.09153	20.2131			--	--	0.12319	18.7981
	--	--			--	--	0.09181	20.2509			--	--	0.12347	18.8127
	--	--			--	--	0.09208	20.2884			--	--	0.12375	18.8272
	--	--			--	--	0.09236	20.3258			--	--	0.12403	18.8416
	--	--			--	--	0.09264	20.3629			--	--	0.12431	18.8558
	--	--			--	--	0.09292	20.3998			--	--	0.12458	18.8699
	--	--			--	--	0.09319	20.4366			--	--	0.12486	18.8838
	--	--			--	--	0.09347	20.4731			--	--	0.12514	18.8976
	--	--			--	--	0.09375	20.5094			--	--	0.12542	18.9113
	--	--			--	--	0.09403	20.5455			--	--	0.12569	18.9249
	--	--			--	--	0.09431	20.5815			--	--	0.12597	18.9383
	--	--			--	--	0.09458	20.6172			--	--	0.12625	18.9516
	--	--			--	--	0.09486	20.6527			--	--	0.12653	18.9648
	--	--			--	--	0.09514	20.688			--	--	0.12681	18.9778
	--	--			--	--	0.09542	20.7231			--	--	0.12708	18.9907
	--	--			--	--	0.09569	20.758			--	--	0.12736	19.0035
	--	--			--	--	0.09597	20.7927			--	--	0.12764	19.0162
	--	--			--	--	0.09625	20.8271			--	--	0.12792	19.0287
	--	--			--	--	0.09653	20.8614			--	--	0.12819	19.0411
	--	--			--	--	0.09681	20.8954			--	--	0.12847	19.0533
	--	--			--	--	0.09708	20.9293			--	--	0.12875	19.0654
	--	--			--	--	0.09736	20.9629			--	--	0.12903	19.0774
	--	--			--	--	0.09764	20.9963			--	--	0.12931	19.0893
	--	--			--	--	0.09792	21.0295			--	--	0.12958	19.101
	--	--			--	--	0.09819	21.0625			--	--	0.12986	19.1126
	--	--			--	--	0.09847	21.0953			--	--	0.13014	19.1241
	--	--			--	--	0.09875	21.1279			--	--	0.13042	19.1354
	--	--			--	--	0.09903	21.1602			--	--	0.13069	19.1466
	--	--			--	--	0.09931	21.1924			--	--	0.13097	19.1577
	--	--			--	--	0.09958	21.2243			--	--	0.13125	19.1687
	--	--			--	--	0.09986	21.256			--	--	0.13153	19.1795
	--	--			--	--	0.10014	21.2875			--	--	0.13181	19.1902
	--	--			--	--	0.10042	21.3188			--	--	0.13208	19.2007
	--	--			--	--	0.10069	21.3498			--	--	0.13236	19.2111
	--	--			--	--	0.10097	21.3806			--	--	0.13264	19.2214
	--	--			--	--	0.10125	21.4113			--	--	0.13292	19.2316
	--	--			--	--	0.10153	21.4417			--	--	0.13319	19.2416
	--	--			--	--	0.10181	21.4719			--	--	0.13347	19.2515
	--	--			--	--	0.10208	22.154			--	--	0.13375	19.2613
	--	--			--	--	0.10236	22.1784			--	--	0.13403	19.2709
	--	--			--	--	0.10264	22.2025			--	--	0.13431	19.2804
	--	--			--	--	0.10292	22.2264			--	--	0.13458	19.2898
	--	--			--	--	0.10319	22.2501			--	--	0.13486	19.2991
	--	--			--	--	0.10347	22.2736			--	--	0.13514	19.3082
	--	--			--	--	0.10375	22.2968			--	--	0.13542	19.3172
	--	--			--	--	0.10403	22.3198			--	--	0.13569	19.326
	--	--			--	--	0.10431	22.3426			--	--	0.13597	19.3348
	--	--			--	--	0.10458	22.3651			--	--	0.13625	19.3434
	--	--			--	--	0.10486	22.3874			--	--	0.13653	19.3519
	--	--			--	--	0.10514	22.4095			--	--	0.13681	19.3602
	--	--			--	--	0.10542	22.4314			--	--	0.13708	19.3685
	--	--			--	--	0.10569	22.453			--	--	0.13736	19.3765
	--	--			--	--	0.10597	22.4744			--	--	0.13764	19.3845
	--	--			--	--	0.10625	22.4956			--	--	0.13792	19.3923
	--	--			--	--	0.10653	22.5165			--	--	0.13819	19.4001
	--	--			--	--	0.10681	22.5373			--	--	0.13847	19.4076
	--	--			--	--	0.10708	22.5578			--	--	0.13875	19.4151
	--	--			--	--	0.10736	22.578			--	--	0.13903	19.4224
	--	--			--	--	0.10764	22.5981			--	--	0.13931	19.4296
	--	--			--	--	0.10792	22.6179			--	--	0.13958	19.4367
	--	--			--	--	0.10819	22.6374			--	--	0.13986	19.4437
	--	--			--	--	0.10847	22.6568			--	--	0.14014	19.4505
	--	--			--	--	0.10875	22.6759			--	--	0.14042	19.4572
	--	--			--	--	0.10903	22.6948			--	--	0.14069	19.4638
	--	--			--	--	0.10931	23.132			--	--	0.14097	19.4702
	--	--			--	--	0.10958	23.1443			--	--	0.14125	19.4765
	--	--			--	--	0.10986	23.1564			--	--	0.14153	19.4827
	--	--			--	--	0.11014	23.1683			--	--	0.14181	19.4888
	--	--			--	--	0.11042	23.18			--	--	0.14208	19.4947
	--	--			--	--	0.11069	23.1915			--	--	0.14236	19.5006
	--	--			--	--	0.11097	23.2027			--	--	0.14264	19.5062
	--	--			--	--	0.11125	23.1992			--	--	0.14292	19.5118
	--	--			--	--	0.11153	23.1893			--	--	0.14319	19.5173
	--	--			--	--	0.11181	23.1792			--	--	0.14347	19.5226
	--	--			--	--	0.11208	23.169			--	--	0.14375	19.5278
	--	--			--	--	0.11236	23.1586			--	--	0.14403	19.5329
	--	--			--	--	0.11264	23.1481			--	--	0.14431	19.5378
	--	--			--	--	0.11292	23.1374			--	--	0.14458	19.5427
	--	--			--	--	0.11319	23.1266			--	--	0.14486	19.5474
	--	--			--	--	0.11347	23.1157			--	--	0.14514	19.552
	--	--			--	--	0.11375	23.1046			--	--	0.14542	19.5564
	--	--			--	--	0.11403	23.0934			--	--	0.14569	19.5608
	--	--			--	--	0.11431	23.082			--	--	0.14597	19.565
	--	--			--	--	0.11458	23.0705			--	--	0.14625	19.5691
	--	--			--	--	0.11486	23.0588			--	--	0.14653	19.5731
	--	--			--	--	0.11514	23.047			--	--	0.14681	19.5769
	--	--			--	--	0.11542	23.0351			--	--	0.14708	19.5807
	--	--			--	--	0.11569	23.0231			--	--	0.14736	19.5843
	--	--			--	--	0.11597	23.0109			--	--	0.14764	19.5878
	--	--			--	--	0.11625	22.9985			--	--	0.14792	19.5911
	--	--			--	--	0.11653	22.9861			--	--	0.14819	19.5944
	--	--			--	--	0.11681	22.9735			--	--	0.14847	19.5975
	--	--			--	--	0.11708	22.9607			--	--	0.14875	19.6005
	--	--			--	--	0.11736	22.9478			--	--	0.14903	19.6035
	--	--			--	--	0.11764	22.9348			--	--	0.14931	19.6062
	--	--			--	--	0.11792	22.9217			--	--	0.14958	19.6089
	--	--			--	--	0.11819	22.9085			--	--	0.14986	19.6114
	--	--			--	--	0.11847	22.8951			--	--	0.15014	19.6139
	--	--			--	--	0.11875	22.8816			--	--	0.15042	19.6162
	--	--			--	--	0.11903	22.8679			--	--	0.15069	19.6184
	--	--			--	--	0.11931	22.8542			--	--	0.15097	19.6205
	--	--			--	--	0.11958	22.8403			--	--	0.15125	19.6224
	--	--			--	--	0.11986	22.8263			--	--	0.15153	19.6243
	--	--			--	--	0.12014	22.8121			--	--	0.15181	19.626
	--	--			--	--	0.12042	22.7979			--	--	0.15208	19.6276
	--	--			--	--	0.12069	22.7835			--	--	0.15236	19.6291
	--	--			--	--	0.12097	22.769			--	--	0.15264	19.6305
	--	--			--	--	0.12125	22.7544			--	--	0.15292	19.6318
	--	--			--	--	0.12153	22.7396			--	--	0.15319	19.6329
	--	--			--	--	0.12181	22.7248			--	--	0.15347	19.634
	--	--			--	--	0.12208	22.7098			--	--	0.15375	19.6349
	--	--			--	--	0.12236	22.6947			--	--	0.15403	19.6357
	--	--			--	--	0.12264	22.6795			--	--	0.15431	19.6364
	--	--			--	--	0.12292	22.6642			--	--	0.15458	19.637
	--	--			--	--	0.12319	22.6487			--	--	0.15486	19.6375
	--	--			--	--	0.12347	22.6332			--	--	0.15514	19.6379
	--	--			--	--	0.12375	22.6175			--	--	0.15542	19.6381
	--	--			--	--	0.12403	22.6018			--	--	0.15569	19.6383
	--	--			--	--	0.12431	22.5859			--	--	0.15597	19.6383
	--	--			--	--	0.12458	22.5699			--	--	0.15625	19.6382
	--	--			--	--	0.12486	22.5538			--	--	0.15653	19.638
	--	--			--	--	0.12514	22.5376			--	--	0.15681	19.6377
	--	--			--	--	0.12542	22.5213			--	--	0.15708	19.6373
	--	--			--	--	0.12569	22.5048			--	--	0.15736	19.6368
	--	--			--	--	0.12597	22.4883			--	--	0.15764	19.6362
	--	--			--	--	0.12625	22.4717			--	--	0.15792	19.6354
	--	--			--	--	0.12653	21.1137			--	--	0.15819	19.6346
	--	--			--	--	0.12681	21.0916			--	--	0.15847	19.6336
	--	--			--	--	0.12708	21.0694			--	--	0.15875	19.6326
	--	--			--	--	0.12736	21.0472			--	--	0.15903	19.6314
	--	--			--	--	0.12764	21.0249			--	--	0.15931	19.6301
	--	--			--	--	0.12792	21.0026			--	--	0.15958	19.6287
	--	--			--	--	0.12819	20.9803			--	--	0.15986	19.6273
	--	--			--	--	0.12847	20.9579			--	--	0.16014	19.6257
	--	--			--	--	0.12875	20.9354			--	--	0.16042	19.624
	--	--			--	--	0.12903	20.9129			--	--	0.16069	19.6222
	--	--			--	--	0.12931	20.8904			--	--	0.16097	19.6203
	--	--			--	--	0.12958	20.8678			--	--	0.16125	19.6182
	--	--			--	--	0.12986	20.8451			--	--	0.16153	19.6161
	--	--			--	--	0.13014	20.8225			--	--	0.16181	19.6139
	--	--			--	--	0.13042	20.7997			--	--	0.16208	19.6116
	--	--			--	--	0.13069	20.7769			--	--	0.16236	19.6092
	--	--			--	--	0.13097	20.7541			--	--	0.16264	19.6066
	--	--			--	--	0.13125	20.7313			--	--	0.16292	19.604
	--	--			--	--	0.13153	20.7083			--	--	0.16319	19.6012
	--	--			--	--	0.13181	20.6854			--	--	0.16347	19.5984
	--	--			--	--	0.13208	20.6624			--	--	0.16375	19.5955
	--	--			--	--	0.13236	20.6394			--	--	0.16403	19.5924
	--	--			--	--	0.13264	20.6163			--	--	0.16431	19.5893
	--	--			--	--	0.13292	20.5932			--	--	0.16458	19.5861
	--	--			--	--	0.13319	20.57			--	--	0.16486	19.5827
	--	--			--	--	0.13347	20.5468			--	--	0.16514	19.5793
	--	--			--	--	0.13375	20.5236			--	--	0.16542	19.5758
	--	--			--	--	0.13403	20.5004			--	--	0.16569	19.5721
	--	--			--	--	0.13431	20.4771			--	--	0.16597	19.5684
	--	--			--	--	0.13458	20.4538			--	--	0.16625	19.5646
	--	--			--	--	0.13486	20.4304			--	--	0.16653	19.5606
	--	--			--	--	0.13514	20.407			--	--	0.16681	19.5566
	--	--			--	--	0.13542	20.3835			--	--	0.16708	19.5525
	--	--			--	--	0.13569	20.3601			--	--	0.16736	19.5483
	--	--			--	--	0.13597	20.3366			--	--	0.16764	19.544
	--	--			--	--	0.13625	19.3028			--	--	0.16792	19.5395
	--	--			--	--	0.13653	19.2784			--	--	0.16819	19.535
	--	--			--	--	0.13681	19.2539			--	--	0.16847	19.5304
	--	--			--	--	0.13708	19.2295			--	--	0.16875	19.5257
	--	--			--	--	0.13736	19.205			--	--	0.16903	19.5209
	--	--			--	--	0.13764	19.1806			--	--	0.16931	19.5161
	--	--			--	--	0.13792	19.1561			--	--	0.16958	19.5111
	--	--			--	--	0.13819	19.1316			--	--	0.16986	19.506
	--	--			--	--	0.13847	19.1072			--	--	0.17014	19.5008
	--	--			--	--	0.13875	19.0827			--	--	0.17042	19.4956
	--	--			--	--	0.13903	19.0582			--	--	0.17069	19.4902
	--	--			--	--	0.13931	19.0337			--	--	0.17097	19.4848
	--	--			--	--	0.13958	19.0092			--	--	0.17125	19.4793
	--	--			--	--	0.13986	18.9847			--	--	0.17153	19.4737
	--	--			--	--	0.14014	18.9602			--	--	0.17181	19.4679
	--	--			--	--	0.14042	18.9356			--	--	0.17208	19.4622
	--	--			--	--	0.14069	18.9111			--	--	0.17236	19.4563
	--	--			--	--	0.14097	18.8866			--	--	0.17264	19.4503
	--	--			--	--	0.14125	18.862			--	--	0.17292	19.4442
	--	--			--	--	0.14153	18.8375			--	--	0.17319	19.4381
	--	--			--	--	0.14181	18.813			--	--	0.17347	19.4319
	--	--			--	--	0.14208	18.7884			--	--	0.17375	19.4255
	--	--			--	--	0.14236	18.7639			--	--	0.17403	19.4191
	--	--			--	--	0.14264	17.1578			--	--	0.17431	19.4126
	--	--			--	--	0.14292	17.1339			--	--	0.17458	19.406
	--	--			--	--	0.14319	17.1101			--	--	0.17486	19.3994
	--	--			--	--	0.14347	17.0862			--	--	0.17514	19.3926
	--	--			--	--	0.14375	17.0624			--	--	0.17542	19.3858
	--	--			--	--	0.14403	17.0385			--	--	0.17569	19.3789
	--	--			--	--	0.14431	17.0147			--	--	0.17597	19.3719
	--	--			--	--	0.14458	16.9909			--	--	0.17625	19.3648
	--	--			--	--	0.14486	16.9672			--	--	0.17653	19.3576
	--	--			--	--	0.14514	16.9435			--	--	0.17681	19.3503
	--	--			--	--	0.14542	16.9197			--	--	0.17708	19.343
	--	--			--	--	0.14569	16.896			--	--	0.17736	19.3356
	--	--			--	--	0.14597	16.8724			--	--	0.17764	19.3281
	--	--			--	--	0.14625	16.8487			--	--	0.17792	19.3205
	--	--			--	--	0.14653	16.8251			--	--	0.17819	19.3128
	--	--			--	--	0.14681	16.8014			--	--	0.17847	19.3051
	--	--			--	--	0.14708	16.7779			--	--	0.17875	19.2972
	--	--			--	--	0.14736	16.7543			--	--	0.17903	19.2893
	--	--			--	--	0.14764	16.127			--	--	0.17931	19.2813
	--	--			--	--	0.14792	16.1041			--	--	0.17958	19.2733
	--	--			--	--	0.14819	16.0812			--	--	0.17986	19.2652
	--	--			--	--	0.14847	16.0584			--	--	0.18014	19.2569
	--	--			--	--	0.14875	16.0356			--	--	0.18042	19.2486
	--	--			--	--	0.14903	16.0128			--	--	0.18069	19.2403
	--	--			--	--	0.14931	15.9901			--	--	0.18097	15.6003
	--	--			--	--	0.14958	15.9674			--	--	0.18125	15.5838
	--	--			--	--	0.14986	15.9447			--	--	0.18153	15.5673
	--	--			--	--	0.15014	15.922			--	--	0.18181	15.5508
	--	--			--	--	0.15042	15.8994			--	--	0.18208	15.5343
	--	--			--	--	0.15069	15.8768			--	--	0.18236	15.5179
	--	--			--	--	0.15097	15.8542			--	--	0.18264	15.5014
	--	--			--	--	0.15125	15.8317			--	--	0.18292	15.4849
	--	--			--	--	0.15153	15.8092			--	--	0.18319	15.4684
	--	--			--	--	0.15181	15.7867			--	--	0.18347	15.452
	--	--			--	--	0.15208	15.7642			--	--	0.18375	15.4355
	--	--			--	--	0.15236	15.7418			--	--	0.18403	15.4191
	--	--			--	--	0.15264	15.7194			--	--	0.18431	15.4026
	--	--			--	--	0.15292	15.697			--	--	0.18458	15.3862
	--	--			--	--	0.15319	15.6747			--	--	0.18486	15.3697
	--	--			--	--	0.15347	15.6524			--	--	0.18514	15.3533
	--	--			--	--	0.15375	15.6301			--	--	0.18542	15.3369
	--	--			--	--	0.15403	15.6078			--	--	0.18569	15.3205
	--	--			--	--	0.15431	15.5856			--	--	0.18597	15.304
	--	--			--	--	0.15458	15.5634			--	--	0.18625	15.2876
	--	--			--	--	0.15486	15.5413			--	--	0.18653	15.2712
	--	--			--	--	0.15514	15.5191			--	--	0.18681	15.2548
	--	--			--	--	0.15542	15.497			--	--	0.18708	15.2384
	--	--			--	--	0.15569	15.475			--	--	0.18736	15.222
	--	--			--	--	0.15597	15.4529			--	--	0.18764	15.2056
	--	--			--	--	0.15625	15.4309			--	--	0.18792	15.1893
	--	--			--	--	0.15653	15.4089			--	--	0.18819	15.1729
	--	--			--	--	0.15681	15.387			--	--	0.18847	15.1565
	--	--			--	--	0.15708	15.365			--	--	0.18875	15.1402
	--	--			--	--	0.15736	15.3432			--	--	0.18903	15.1238
	--	--			--	--	0.15764	15.3213			--	--	0.18931	15.1075
	--	--			--	--	0.15792	15.2995			--	--	0.18958	15.0911
	--	--			--	--	0.15819	15.2777			--	--	0.18986	15.0748
	--	--			--	--	0.15847	15.2559			--	--	0.19014	15.0585
	--	--			--	--	0.15875	15.2342			--	--	0.19042	15.0422
	--	--			--	--	0.15903	15.2125			--	--	0.19069	15.0259
	--	--			--	--	0.15931	15.1908			--	--	0.19097	15.0096
	--	--			--	--	0.15958	15.1692			--	--	0.19125	14.9933
	--	--			--	--	0.15986	15.1476			--	--	0.19153	14.977
	--	--			--	--	0.16014	15.126			--	--	0.19181	14.9607
	--	--			--	--	0.16042	15.1045			--	--	0.19208	14.9444
	--	--			--	--	0.16069	15.083			--	--	0.19236	14.9282
	--	--			--	--	0.16097	15.0615			--	--	0.19264	14.9119
	--	--			--	--	0.16125	15.04			--	--	0.19292	14.8957
	--	--			--	--	0.16153	15.0186			--	--	0.19319	14.8795
	--	--			--	--	0.16181	14.9972			--	--	0.19347	14.8632
	--	--			--	--	0.16208	14.9759			--	--	0.19375	14.847
	--	--			--	--	0.16236	14.9545			--	--	0.19403	14.8308
	--	--			--	--	0.16264	14.9333			--	--	0.19431	14.8146
	--	--			--	--	0.16292	14.912			--	--	0.19458	14.7984
	--	--			--	--	0.16319	14.8908			--	--	0.19486	14.7822
	--	--			--	--	0.16347	14.8696			--	--	0.19514	14.7661
	--	--			--	--	0.16375	14.8485			--	--	0.19542	14.7499
	--	--			--	--	0.16403	14.8274			--	--	0.19569	14.7338
	--	--			--	--	0.16431	14.8063			--	--	0.19597	14.7176
	--	--			--	--	0.16458	14.7852			--	--	0.19625	14.7015
	--	--			--	--	0.16486	14.7642			--	--	0.19653	14.6854
	--	--			--	--	0.16514	14.7432			--	--	0.19681	14.6692
	--	--			--	--	0.16542	14.7222			--	--	0.19708	14.6531
	--	--			--	--	0.16569	14.7013			--	--	0.19736	14.637
	--	--			--	--	0.16597	14.6804			--	--	0.19764	14.621
	--	--			--	--	0.16625	14.6595			--	--	0.19792	14.6049
	--	--			--	--	0.16653	14.6387			--	--	0.19819	14.5889
	--	--			--	--	0.16681	14.6179			--	--	0.19847	14.5728
	--	--			--	--	0.16708	14.5971			--	--	0.19875	14.5568
	--	--			--	--	0.16736	14.5764			--	--	0.19903	14.5407
	--	--			--	--	0.16764	14.5557			--	--	0.19931	14.5247
	--	--			--	--	0.16792	14.535			--	--	0.19958	14.5087
	--	--			--	--	0.16819	14.5144			--	--	0.19986	14.4927
	--	--			--	--	0.16847	14.4938			--	--	0.20014	14.4768
	--	--			--	--	0.16875	14.4733			--	--	0.20042	14.4608
	--	--			--	--	0.16903	14.4528			--	--	0.20069	14.4448
	--	--			--	--	0.16931	14.4323			--	--	0.20097	14.4289
	--	--			--	--	0.16958	14.4118			--	--	0.20125	14.413
	--	--			--	--	0.16986	14.3914			--	--	0.20153	14.397
	--	--			--	--	0.17014	14.371			--	--	0.20181	14.3811
	--	--			--	--	0.17042	14.3506			--	--	0.20208	14.3652
	--	--			--	--	0.17069	14.3303			--	--	0.20236	14.3494
	--	--			--	--	0.17097	14.31			--	--	0.20264	14.3335
	--	--			--	--	0.17125	14.2898			--	--	0.20292	14.3176
	--	--			--	--	0.17153	14.2695			--	--	0.20319	14.3018
	--	--			--	--	0.17181	14.2493			--	--	0.20347	14.2859
	--	--			--	--	0.17208	14.2292			--	--	0.20375	14.2701
	--	--			--	--	0.17236	14.2091			--	--	0.20403	14.2543
	--	--			--	--	0.17264	14.189			--	--	0.20431	14.2385
	--	--			--	--	0.17292	14.169			--	--	0.20458	14.2228
	--	--			--	--	0.17319	14.1489			--	--	0.20486	14.207
	--	--			--	--	0.17347	14.129			--	--	0.20514	14.1912
	--	--			--	--	0.17375	14.109			--	--	0.20542	14.1755
	--	--			--	--	0.17403	14.0891			--	--	0.20569	14.1598
	--	--			--	--	0.17431	14.0693			--	--	0.20597	14.1441
	--	--			--	--	0.17458	14.0494			--	--	0.20625	14.1284
	--	--			--	--	0.17486	14.0297			--	--	0.20653	14.1127
	--	--			--	--	0.17514	14.0099			--	--	0.20681	14.097
	--	--			--	--	0.17542	13.9902			--	--	0.20708	14.0813
	--	--			--	--	0.17569	13.9705			--	--	0.20736	14.0657
	--	--			--	--	0.17597	13.9508			--	--	0.20764	14.0501
	--	--			--	--	0.17625	13.9312			--	--	0.20792	14.0344
	--	--			--	--	0.17653	13.9116			--	--	0.20819	14.0189
	--	--			--	--	0.17681	13.892			--	--	0.20847	14.0033
	--	--			--	--	0.17708	13.8725			--	--	0.20875	13.9877
	--	--			--	--	0.17736	13.853			--	--	0.20903	13.9722
	--	--			--	--	0.17764	13.8336			--	--	0.20931	13.9566
	--	--			--	--	0.17792	13.8142			--	--	0.20958	13.9411
	--	--			--	--	0.17819	13.7948			--	--	0.20986	13.9256
	--	--			--	--	0.17847	13.7754			--	--	0.21014	13.9101
	--	--			--	--	0.17875	13.7561			--	--	0.21042	13.8946
	--	--			--	--	0.17903	13.7368			--	--	0.21069	13.8791
	--	--			--	--	0.17931	13.7176			--	--	0.21097	13.8637
	--	--			--	--	0.17958	13.6984			--	--	0.21125	13.8483
	--	--			--	--	0.17986	13.6792			--	--	0.21153	13.8328
	--	--			--	--	0.18014	13.6601			--	--	0.21181	13.8174
	--	--			--	--	0.18042	13.641			--	--	0.21208	13.802
	--	--			--	--	0.18069	13.6219			--	--	0.21236	13.7867
	--	--			--	--	0.18097	13.6029			--	--	0.21264	13.7713
	--	--			--	--	0.18125	13.5839			--	--	0.21292	13.7559
	--	--			--	--	0.18153	13.5649			--	--	0.21319	13.7406
	--	--			--	--	0.18181	13.546			--	--	0.21347	13.7253
	--	--			--	--	0.18208	13.5271			--	--	0.21375	13.71
	--	--			--	--	0.18236	13.5082			--	--	0.21403	13.6947
	--	--			--	--	0.18264	13.4894			--	--	0.21431	13.6794
	--	--			--	--	0.18292	13.4706			--	--	0.21458	13.6642
	--	--			--	--	0.18319	13.4519			--	--	0.21486	13.649
	--	--			--	--	0.18347	13.4332			--	--	0.21514	13.6338
	--	--			--	--	0.18375	13.4145			--	--	0.21542	13.6185
	--	--			--	--	0.18403	13.3958			--	--	0.21569	13.6034
	--	--			--	--	0.18431	13.3772			--	--	0.21597	13.5882
	--	--			--	--	0.18458	13.3586			--	--	0.21625	13.573
	--	--			--	--	0.18486	13.3401			--	--	0.21653	13.5579
	--	--			--	--	0.18514	13.3216			--	--	0.21681	13.5428
	--	--			--	--	0.18542	13.3031			--	--	0.21708	13.5277
	--	--			--	--	0.18569	13.2847			--	--	0.21736	13.5126
	--	--			--	--	0.18597	13.2663			--	--	0.21764	13.4975
	--	--			--	--	0.18625	13.2479			--	--	0.21792	13.4824
	--	--			--	--	0.18653	13.2296			--	--	0.21819	9.8707
	--	--			--	--	0.18681	13.2113			--	--	0.21847	9.8613
	--	--			--	--	0.18708	13.193			--	--	0.21875	9.8519
	--	--			--	--	0.18736	13.1748			--	--	0.21903	9.8425
	--	--			--	--	0.18764	13.1566			--	--	0.21931	9.8331
	--	--			--	--	0.18792	13.1384			--	--	0.21958	9.8238
	--	--			--	--	0.18819	13.1203			--	--	0.21986	9.8145
	--	--			--	--	0.18847	13.1022			--	--	0.22014	9.8051
	--	--			--	--	0.18875	13.0842			--	--	0.22042	9.7959
	--	--			--	--	0.18903	13.0662			--	--	0.22069	9.7866
	--	--			--	--	0.18931	13.0482			--	--	0.22097	9.7773
	--	--			--	--	0.18958	13.0302			--	--	0.22125	9.7681
	--	--			--	--	0.18986	13.0123			--	--	0.22153	9.7589
	--	--			--	--	0.19014	12.9945			--	--	0.22181	9.7497
	--	--			--	--	0.19042	12.9766			--	--	0.22208	9.7405
	--	--			--	--	0.19069	12.9588			--	--	0.22236	9.7313
	--	--			--	--	0.19097	12.941			--	--	0.22264	9.7222
	--	--			--	--	0.19125	12.9233			--	--	0.22292	9.713
	--	--			--	--	0.19153	12.9056			--	--	0.22319	9.7039
	--	--			--	--	0.19181	12.8879			--	--	0.22347	9.6948
	--	--			--	--	0.19208	12.8703			--	--	0.22375	9.6857
	--	--			--	--	0.19236	12.8527			--	--	0.22403	9.6767
	--	--			--	--	0.19264	12.8351			--	--	0.22431	9.6676
	--	--			--	--	0.19292	12.8176			--	--	0.22458	9.6586
	--	--			--	--	0.19319	12.8001			--	--	0.22486	9.6495
	--	--			--	--	0.19347	12.7827			--	--	0.22514	9.6405
	--	--			--	--	0.19375	12.7652			--	--	0.22542	9.6316
	--	--			--	--	0.19403	12.7479			--	--	0.22569	9.6226
	--	--			--	--	0.19431	12.7305			--	--	0.22597	9.6136
	--	--			--	--	0.19458	12.7132			--	--	0.22625	9.6047
	--	--			--	--	0.19486	12.6959			--	--	0.22653	9.5958
	--	--			--	--	0.19514	12.6786			--	--	0.22681	9.5869
	--	--			--	--	0.19542	12.6614			--	--	0.22708	9.578
	--	--			--	--	0.19569	12.6442			--	--	0.22736	9.5692
	--	--			--	--	0.19597	12.6271			--	--	0.22764	9.5603
	--	--			--	--	0.19625	12.61			--	--	0.22792	9.5515
	--	--			--	--	0.19653	12.5929			--	--	0.22819	9.5427
	--	--			--	--	0.19681	12.5758			--	--	0.22847	9.5339
	--	--			--	--	0.19708	12.5588			--	--	0.22875	9.5251
	--	--			--	--	0.19736	12.5418			--	--	0.22903	9.5164
	--	--			--	--	0.19764	12.5249			--	--	0.22931	9.5076
	--	--			--	--	0.19792	12.508			--	--	0.22958	9.4989
	--	--			--	--	0.19819	12.4911			--	--	0.22986	9.4902
	--	--			--	--	0.19847	12.4743			--	--	0.23014	9.4815
	--	--			--	--	0.19875	12.4575			--	--	0.23042	9.4728
	--	--			--	--	0.19903	12.4407			--	--	0.23069	9.4642
	--	--			--	--	0.19931	12.424			--	--	0.23097	9.4555
	--	--			--	--	0.19958	12.4073			--	--	0.23125	9.4469
	--	--			--	--	0.19986	12.3906			--	--	0.23153	9.4383
	--	--			--	--	0.20014	12.374			--	--	0.23181	9.4297
	--	--			--	--	0.20042	12.3574			--	--	0.23208	9.4211
	--	--			--	--	0.20069	12.3408			--	--	0.23236	9.4125
	--	--			--	--	0.20097	12.3243			--	--	0.23264	9.404
	--	--			--	--	0.20125	12.3078			--	--	0.23292	9.3955
	--	--			--	--	0.20153	12.2913			--	--	0.23319	9.387
	--	--			--	--	0.20181	12.2749			--	--	0.23347	9.3785
	--	--			--	--	0.20208	12.2585			--	--	0.23375	9.37
	--	--			--	--	0.20236	12.2422			--	--	0.23403	9.3615
	--	--			--	--	0.20264	12.2258			--	--	0.23431	9.3531
	--	--			--	--	0.20292	12.2095			--	--	0.23458	9.3446
	--	--			--	--	0.20319	12.1933			--	--	0.23486	9.3362
	--	--			--	--	0.20347	12.1771			--	--	0.23514	9.3278
	--	--			--	--	0.20375	12.1609			--	--	0.23542	9.3195
	--	--			--	--	0.20403	12.1447			--	--	0.23569	9.3111
	--	--			--	--	0.20431	12.1286			--	--	0.23597	9.3027
	--	--			--	--	0.20458	12.1125			--	--	0.23625	9.2944
	--	--			--	--	0.20486	12.0965			--	--	0.23653	9.2861
	--	--			--	--	0.20514	12.0804			--	--	0.23681	9.2778
	--	--			--	--	0.20542	12.0645			--	--	0.23708	9.2695
	--	--			--	--	0.20569	12.0485			--	--	0.23736	9.2613
	--	--			--	--	0.20597	12.0326			--	--	0.23764	9.253
	--	--			--	--	0.20625	12.0167			--	--	0.23792	9.2448
	--	--			--	--	0.20653	12.0008			--	--	0.23819	9.2365
	--	--			--	--	0.20681	11.985			--	--	0.23847	9.2283
	--	--			--	--	0.20708	11.9692			--	--	0.23875	9.2202
	--	--			--	--	0.20736	11.9535			--	--	0.23903	9.212
	--	--			--	--	0.20764	11.9378			--	--	0.23931	9.2038
	--	--			--	--	0.20792	11.9221			--	--	0.23958	9.1957
	--	--			--	--	0.20819	11.9064			--	--	0.23986	9.1876
	--	--			--	--	0.20847	11.8908			--	--	0.24014	9.1795
	--	--			--	--	0.20875	11.8752			--	--	0.24042	9.1714
	--	--			--	--	0.20903	11.8596			--	--	0.24069	9.1633
	--	--			--	--	0.20931	11.8441			--	--	0.24097	9.1552
	--	--			--	--	0.20958	11.8286			--	--	0.24125	9.1472
	--	--			--	--	0.20986	11.8132			--	--	0.24153	9.1391
	--	--			--	--	0.21014	11.7978			--	--	0.24181	9.1311
	--	--			--	--	0.21042	11.7824			--	--	0.24208	9.1231
	--	--			--	--	0.21069	11.767			--	--	0.24236	9.1152
	--	--			--	--	0.21097	11.7517			--	--	0.24264	9.1072
	--	--			--	--	0.21125	11.7364			--	--	0.24292	9.0992
	--	--			--	--	0.21153	11.7212			--	--	0.24319	9.0913
	--	--			--	--	0.21181	11.7059			--	--	0.24347	9.0834
	--	--			--	--	0.21208	11.6907			--	--	0.24375	9.0755
	--	--			--	--	0.21236	11.1513			--	--	0.24403	9.0676
	--	--			--	--	0.21264	11.1373			--	--	0.24431	9.0597
	--	--			--	--	0.21292	11.1234			--	--	0.24458	9.0519
	--	--			--	--	0.21319	11.1095			--	--	0.24486	9.044
	--	--			--	--	0.21347	11.0956			--	--	0.24514	9.0362
	--	--			--	--	0.21375	11.0817			--	--	0.24542	9.0284
	--	--			--	--	0.21403	11.0679			--	--	0.24569	9.0206
	--	--			--	--	0.21431	11.0541			--	--	0.24597	9.0128
	--	--			--	--	0.21458	11.0404			--	--	0.24625	9.005
	--	--			--	--	0.21486	11.0266			--	--	0.24653	8.9973
	--	--			--	--	0.21514	11.0129			--	--	0.24681	8.9896
	--	--			--	--	0.21542	10.9993			--	--	0.24708	8.9818
	--	--			--	--	0.21569	10.9856			--	--	0.24736	8.9741
	--	--			--	--	0.21597	10.972			--	--	0.24764	8.9664
	--	--			--	--	0.21625	10.9584			--	--	0.24792	8.9588
	--	--			--	--	0.21653	10.9449			--	--	0.24819	8.9511
	--	--			--	--	0.21681	10.9313			--	--	0.24847	8.9435
	--	--			--	--	0.21708	10.9178			--	--	0.24875	8.9358
	--	--			--	--	0.21736	10.9044			--	--	0.24903	8.9282
	--	--			--	--	0.21764	10.891			--	--	0.24931	8.9206
	--	--			--	--	0.21792	10.8776			--	--	0.24958	8.913
	--	--			--	--	0.21819	10.8642			--	--	0.24986	8.9055
	--	--			--	--	0.21847	10.8509			--	--	0.25014	8.8979
	--	--			--	--	0.21875	10.8376			--	--	0.25042	8.8904
	--	--			--	--	0.21903	10.8243			--	--	0.25069	8.8829
	--	--			--	--	0.21931	10.811			--	--	0.25097	8.8754
	--	--			--	--	0.21958	10.7978			--	--	0.25125	8.8679
	--	--			--	--	0.21986	10.7846			--	--	0.25153	8.8604
	--	--			--	--	0.22014	10.7715			--	--	0.25181	8.8529
	--	--			--	--	0.22042	10.3293			--	--	0.25208	8.8455
	--	--			--	--	0.22069	10.3172			--	--	0.25236	8.838
	--	--			--	--	0.22097	10.3051			--	--	0.25264	8.8306
	--	--			--	--	0.22125	10.293			--	--	0.25292	8.8232
	--	--			--	--	0.22153	10.281			--	--	0.25319	8.8158
	--	--			--	--	0.22181	10.269			--	--	0.25347	8.8084
	--	--			--	--	0.22208	10.257			--	--	0.25375	8.8011
	--	--			--	--	0.22236	10.245			--	--	0.25403	8.7937
	--	--			--	--	0.22264	10.2331			--	--	0.25431	8.7864
	--	--			--	--	0.22292	10.2212			--	--	0.25458	8.7791
	--	--			--	--	0.22319	10.2093			--	--	0.25486	8.7718
	--	--			--	--	0.22347	10.1975			--	--	0.25514	8.7645
	--	--			--	--	0.22375	10.1857			--	--	0.25542	8.7572
	--	--			--	--	0.22403	10.1739			--	--	0.25569	8.75
	--	--			--	--	0.22431	10.1621			--	--	0.25597	8.7427
	--	--			--	--	0.22458	10.1504			--	--	0.25625	8.7355
	--	--			--	--	0.22486	10.1387			--	--	0.25653	8.7283
	--	--			--	--	0.22514	10.127			--	--	0.25681	8.7211
	--	--			--	--	0.22542	10.1153			--	--	0.25708	8.7139
	--	--			--	--	0.22569	10.1037			--	--	0.25736	8.7067
	--	--			--	--	0.22597	10.0921			--	--	0.25764	8.6995
	--	--			--	--	0.22625	10.0805			--	--	0.25792	8.6924
	--	--			--	--	0.22653	10.069			--	--	0.25819	8.6853
	--	--			--	--	0.22681	10.0574			--	--	0.25847	8.6782
	--	--			--	--	0.22708	10.046			--	--	0.25875	8.6711
	--	--			--	--	0.22736	10.0345			--	--	0.25903	8.664
	--	--			--	--	0.22764	10.023			--	--	0.25931	8.6569
	--	--			--	--	0.22792	10.0116			--	--	0.25958	8.6498
	--	--			--	--	0.22819	10.0002			--	--	0.25986	8.6428
	--	--			--	--	0.22847	9.9889			--	--	0.26014	8.6358
	--	--			--	--	0.22875	9.9775			--	--	0.26042	8.6287
	--	--			--	--	0.22903	9.9662			--	--	0.26069	8.6217
	--	--			--	--	0.22931	9.955			--	--	0.26097	8.6147
	--	--			--	--	0.22958	9.9437			--	--	0.26125	8.6078
	--	--			--	--	0.22986	9.9325			--	--	0.26153	8.6008
	--	--			--	--	0.23014	9.9213			--	--	0.26181	8.5939
	--	--			--	--	0.23042	9.9101			--	--	0.26208	8.5869
	--	--			--	--	0.23069	9.899			--	--	0.26236	8.58
	--	--			--	--	0.23097	9.8878			--	--	0.26264	8.5731
	--	--			--	--	0.23125	9.8767			--	--	0.26292	8.5662
	--	--			--	--	0.23153	9.8657			--	--	0.26319	8.5593
	--	--			--	--	0.23181	9.8546			--	--	0.26347	8.5525
	--	--			--	--	0.23208	9.8436			--	--	0.26375	8.5456
	--	--			--	--	0.23236	9.8326			--	--	0.26403	8.5388
	--	--			--	--	0.23264	9.8216			--	--	0.26431	8.532
	--	--			--	--	0.23292	9.8107			--	--	0.26458	8.5251
	--	--			--	--	0.23319	9.7997			--	--	0.26486	8.5183
	--	--			--	--	0.23347	9.7888			--	--	0.26514	8.5116
	--	--			--	--	0.23375	9.778			--	--	0.26542	8.5048
	--	--			--	--	0.23403	9.7671			--	--	0.26569	8.498
	--	--			--	--	0.23431	9.7563			--	--	0.26597	8.4913
	--	--			--	--	0.23458	9.7455			--	--	0.26625	8.4846
	--	--			--	--	0.23486	9.7348			--	--	0.26653	8.4779
	--	--			--	--	0.23514	9.724			--	--	0.26681	8.4712
	--	--			--	--	0.23542	9.7133			--	--	0.26708	8.4645
	--	--			--	--	0.23569	9.7026			--	--	0.26736	8.4578
	--	--			--	--	0.23597	9.6919			--	--	0.26764	8.4511
	--	--			--	--	0.23625	9.6813			--	--	0.26792	8.4445
	--	--			--	--	0.23653	9.6707			--	--	0.26819	8.4379
	--	--			--	--	0.23681	9.6601			--	--	0.26847	8.4312
	--	--			--	--	0.23708	9.6495			--	--	0.26875	8.4246
	--	--			--	--	0.23736	9.639			--	--	0.26903	8.418
	--	--			--	--	0.23764	9.6285			--	--	0.26931	8.4115
	--	--			--	--	0.23792	9.618			--	--	0.26958	8.4049
	--	--			--	--	0.23819	9.6075			--	--	0.26986	8.3983
	--	--			--	--	0.23847	9.5971			--	--	0.27014	8.3918
	--	--			--	--	0.23875	9.5866			--	--	0.27042	8.3853
	--	--			--	--	0.23903	9.5763			--	--	0.27069	8.3787
	--	--			--	--	0.23931	9.5659			--	--	0.27097	8.3722
	--	--			--	--	0.23958	9.5555			--	--	0.27125	8.3658
	--	--			--	--	0.23986	9.5452			--	--	0.27153	8.3593
	--	--			--	--	0.24014	9.5349			--	--	0.27181	8.3528
	--	--			--	--	0.24042	9.5247			--	--	0.27208	8.3463
	--	--			--	--	0.24069	9.5144			--	--	0.27236	8.3399
	--	--			--	--	0.24097	9.5042			--	--	0.27264	8.3335
	--	--			--	--	0.24125	9.494			--	--	0.27292	8.3271
	--	--			--	--	0.24153	9.4838			--	--	0.27319	8.3207
	--	--			--	--	0.24181	9.4736			--	--	0.27347	8.3143
	--	--			--	--	0.24208	9.4635			--	--	0.27375	8.3079
	--	--			--	--	0.24236	9.4534			--	--	0.27403	8.3015
	--	--			--	--	0.24264	9.4433			--	--	0.27431	8.2952
	--	--			--	--	0.24292	9.4333			--	--	0.27458	8.2888
	--	--			--	--	0.24319	9.4232			--	--	0.27486	8.2825
	--	--			--	--	0.24347	9.4132			--	--	0.27514	8.2762
	--	--			--	--	0.24375	9.4033			--	--	0.27542	8.2699
	--	--			--	--	0.24403	9.3933			--	--	0.27569	8.2636
	--	--			--	--	0.24431	9.3834			--	--	0.27597	8.2573
	--	--			--	--	0.24458	9.3734			--	--	0.27625	8.2511
	--	--			--	--	0.24486	9.3636			--	--	0.27653	8.2448
	--	--			--	--	0.24514	9.3537			--	--	0.27681	8.2386
	--	--			--	--	0.24542	9.3439			--	--	0.27708	8.2324
	--	--			--	--	0.24569	9.334			--	--	0.27736	8.2262
	--	--			--	--	0.24597	9.3242			--	--	0.27764	8.22
	--	--			--	--	0.24625	9.3145			--	--	0.27792	8.2138
	--	--			--	--	0.24653	9.3047			--	--	0.27819	8.2076
	--	--			--	--	0.24681	9.295			--	--	0.27847	8.2015
	--	--			--	--	0.24708	9.2853			--	--	0.27875	8.1953
	--	--			--	--	0.24736	9.2756			--	--	0.27903	8.1892
	--	--			--	--	0.24764	9.266			--	--	0.27931	8.1831
	--	--			--	--	0.24792	9.2563			--	--	0.27958	8.177
	--	--			--	--	0.24819	9.2467			--	--	0.27986	8.1709
	--	--			--	--	0.24847	9.2371			--	--	0.28014	8.1648
	--	--			--	--	0.24875	9.2276			--	--	0.28042	8.1587
	--	--			--	--	0.24903	9.218			--	--	0.28069	8.1527
	--	--			--	--	0.24931	9.2085			--	--	0.28097	8.1466
	--	--			--	--	0.24958	9.199			--	--	0.28125	8.1406
	--	--			--	--	0.24986	9.1895			--	--	0.28153	8.1346
	--	--			--	--	0.25014	9.1801			--	--	0.28181	8.1285
	--	--			--	--	0.25042	9.1706			--	--	0.28208	8.1225
	--	--			--	--	0.25069	9.1612			--	--	0.28236	8.1166
	--	--			--	--	0.25097	9.1519			--	--	0.28264	8.1106
	--	--			--	--	0.25125	9.1425			--	--	0.28292	8.1046
	--	--			--	--	0.25153	9.1331			--	--	0.28319	8.0987
	--	--			--	--	0.25181	9.1238			--	--	0.28347	8.0927
	--	--			--	--	0.25208	9.1145			--	--	0.28375	8.0868
	--	--			--	--	0.25236	9.1052			--	--	0.28403	8.0809
	--	--			--	--	0.25264	9.096			--	--	0.28431	8.075
	--	--			--	--	0.25292	9.0867			--	--	0.28458	8.0691
	--	--			--	--	0.25319	9.0775			--	--	0.28486	8.0632
	--	--			--	--	0.25347	9.0683			--	--	0.28514	8.0574
	--	--			--	--	0.25375	9.0592			--	--	0.28542	8.0515
	--	--			--	--	0.25403	9.05			--	--	0.28569	8.0457
	--	--			--	--	0.25431	9.0409			--	--	0.28597	8.0398
	--	--			--	--	0.25458	9.0318			--	--	0.28625	8.034
	--	--			--	--	0.25486	9.0227			--	--	0.28653	8.0282
	--	--			--	--	0.25514	9.0136			--	--	0.28681	8.0224
	--	--			--	--	0.25542	9.0046			--	--	0.28708	8.0167
	--	--			--	--	0.25569	8.9956			--	--	0.28736	8.0109
	--	--			--	--	0.25597	8.9866			--	--	0.28764	8.0051
	--	--			--	--	0.25625	8.9776			--	--	0.28792	7.9994
	--	--			--	--	0.25653	8.9687			--	--	0.28819	7.9936
	--	--			--	--	0.25681	8.9597			--	--	0.28847	7.9879
	--	--			--	--	0.25708	8.9508			--	--	0.28875	7.9822
	--	--			--	--	0.25736	8.9419			--	--	0.28903	7.9765
	--	--			--	--	0.25764	8.9331			--	--	0.28931	7.9708
	--	--			--	--	0.25792	8.9242			--	--	0.28958	7.9651
	--	--			--	--	0.25819	8.9154			--	--	0.28986	7.9595
	--	--			--	--	0.25847	8.9066			--	--	0.29014	7.9538
	--	--			--	--	0.25875	8.8978			--	--	0.29042	7.9482
	--	--			--	--	0.25903	8.889			--	--	0.29069	7.9425
	--	--			--	--	0.25931	8.8803			--	--	0.29097	7.9369
	--	--			--	--	0.25958	8.8716			--	--	0.29125	7.9313
	--	--			--	--	0.25986	8.8629			--	--	0.29153	7.9257
	--	--			--	--	0.26014	8.8542			--	--	0.29181	7.9201
	--	--			--	--	0.26042	8.8455			--	--	0.29208	7.9146
	--	--			--	--	0.26069	8.8369			--	--	0.29236	7.909
	--	--			--	--	0.26097	8.8283			--	--	0.29264	7.9034
	--	--			--	--	0.26125	8.8197			--	--	0.29292	7.8979
	--	--			--	--	0.26153	8.8111			--	--	0.29319	7.8924
	--	--			--	--	0.26181	8.8026			--	--	0.29347	7.8869
	--	--			--	--	0.26208	8.794			--	--	0.29375	7.8813
	--	--			--	--	0.26236	8.7855			--	--	0.29403	7.8758
	--	--			--	--	0.26264	8.777			--	--	0.29431	7.8704
	--	--			--	--	0.26292	8.7685			--	--	0.29458	7.8649
	--	--			--	--	0.26319	8.7601			--	--	0.29486	7.8594
	--	--			--	--	0.26347	8.7517			--	--	0.29514	7.854
	--	--			--	--	0.26375	8.7432			--	--	0.29542	7.8485
	--	--			--	--	0.26403	8.7348			--	--	0.29569	7.8431
	--	--			--	--	0.26431	8.7265			--	--	0.29597	7.8377
	--	--			--	--	0.26458	8.7181			--	--	0.29625	7.8323
	--	--			--	--	0.26486	8.7098			--	--	0.29653	7.8269
	--	--			--	--	0.26514	8.7015			--	--	0.29681	7.8215
	--	--			--	--	0.26542	8.6932			--	--	0.29708	7.8161
	--	--			--	--	0.26569	8.6849			--	--	0.29736	7.8108
	--	--			--	--	0.26597	8.6766			--	--	0.29764	7.8054
	--	--			--	--	0.26625	8.6684			--	--	0.29792	7.8001
	--	--			--	--	0.26653	8.6602			--	--	0.29819	7.7947
	--	--			--	--	0.26681	8.652			--	--	0.29847	7.7894
	--	--			--	--	0.26708	8.6438			--	--	0.29875	7.7841
	--	--			--	--	0.26736	8.6357			--	--	0.29903	7.7788
	--	--			--	--	0.26764	8.6275			--	--	0.29931	7.7735
	--	--			--	--	0.26792	8.6194			--	--	0.29958	7.7682
	--	--			--	--	0.26819	8.6113			--	--	0.29986	7.763
	--	--			--	--	0.26847	8.6032			--	--	0.30014	7.7577
	--	--			--	--	0.26875	8.5952			--	--	0.30042	7.7525
	--	--			--	--	0.26903	8.5871			--	--	0.30069	7.7472
	--	--			--	--	0.26931	8.5791			--	--	0.30097	7.742
	--	--			--	--	0.26958	8.5711			--	--	0.30125	7.7368
	--	--			--	--	0.26986	8.5631			--	--	0.30153	7.7316
	--	--			--	--	0.27014	8.5552			--	--	0.30181	7.7264
	--	--			--	--	0.27042	8.5472			--	--	0.30208	7.7212
	--	--			--	--	0.27069	8.5393			--	--	0.30236	7.7161
	--	--			--	--	0.27097	8.5314			--	--	0.30264	7.7109
	--	--			--	--	0.27125	8.5235			--	--	0.30292	7.7058
	--	--			--	--	0.27153	8.5156			--	--	0.30319	7.7006
	--	--			--	--	0.27181	8.5078			--	--	0.30347	7.6955
	--	--			--	--	0.27208	8.4999			--	--	0.30375	7.6904
	--	--			--	--	0.27236	8.4921			--	--	0.30403	7.6853
	--	--			--	--	0.27264	8.4843			--	--	0.30431	7.6802
	--	--			--	--	0.27292	8.4766			--	--	0.30458	7.6751
	--	--			--	--	0.27319	8.4688			--	--	0.30486	7.67
	--	--			--	--	0.27347	8.4611			--	--	0.30514	7.665
	--	--			--	--	0.27375	8.4534			--	--	0.30542	7.6599
	--	--			--	--	0.27403	8.4457			--	--	0.30569	7.6549
	--	--			--	--	0.27431	8.438			--	--	0.30597	7.6498
	--	--			--	--	0.27458	8.4303			--	--	0.30625	7.6448
	--	--			--	--	0.27486	8.4227			--	--	0.30653	7.6398
	--	--			--	--	0.27514	8.415			--	--	0.30681	7.6348
	--	--			--	--	0.27542	8.4074			--	--	0.30708	7.6298
	--	--			--	--	0.27569	8.3998			--	--	0.30736	7.6248
	--	--			--	--	0.27597	8.3922			--	--	0.30764	7.6198
	--	--			--	--	0.27625	8.3847			--	--	0.30792	7.6149
	--	--			--	--	0.27653	8.3772			--	--	0.30819	7.6099
	--	--			--	--	0.27681	8.3696			--	--	0.30847	7.605
	--	--			--	--	0.27708	8.3621			--	--	0.30875	7.6
	--	--			--	--	0.27736	8.3546			--	--	0.30903	7.5951
	--	--			--	--	0.27764	8.3472			--	--	0.30931	7.5902
	--	--			--	--	0.27792	8.3397			--	--	0.30958	7.5853
	--	--			--	--	0.27819	8.3323			--	--	0.30986	7.5804
	--	--			--	--	0.27847	8.3249			--	--	0.31014	7.5755
	--	--			--	--	0.27875	8.3175			--	--	0.31042	7.5707
	--	--			--	--	0.27903	8.3101			--	--	0.31069	7.5658
	--	--			--	--	0.27931	8.3028			--	--	0.31097	7.5609
	--	--			--	--	0.27958	8.2954			--	--	0.31125	7.5561
	--	--			--	--	0.27986	8.2881			--	--	0.31153	7.5513
	--	--			--	--	0.28014	8.2808			--	--	0.31181	7.5464
	--	--			--	--	0.28042	8.2735			--	--	0.31208	7.5416
	--	--			--	--	0.28069	8.2662			--	--	0.31236	7.5368
	--	--			--	--	0.28097	8.259			--	--	0.31264	7.532
	--	--			--	--	0.28125	8.2518			--	--	0.31292	7.5272
	--	--			--	--	0.28153	8.2445			--	--	0.31319	7.5225
	--	--			--	--	0.28181	8.2373			--	--	0.31347	7.5177
	--	--			--	--	0.28208	8.2302			--	--	0.31375	7.513
	--	--			--	--	0.28236	8.223			--	--	0.31403	7.5082
	--	--			--	--	0.28264	8.2158			--	--	0.31431	7.5035
	--	--			--	--	0.28292	8.2087			--	--	0.31458	7.4988
	--	--			--	--	0.28319	8.2016			--	--	0.31486	7.494
	--	--			--	--	0.28347	8.1945			--	--	0.31514	7.4893
	--	--			--	--	0.28375	8.1874			--	--	0.31542	7.4846
	--	--			--	--	0.28403	8.1803			--	--	0.31569	7.48
	--	--			--	--	0.28431	8.1733			--	--	0.31597	7.4753
	--	--			--	--	0.28458	8.1663			--	--	0.31625	7.4706
	--	--			--	--	0.28486	8.1593			--	--	0.31653	7.466
	--	--			--	--	0.28514	8.1523			--	--	0.31681	7.4613
	--	--			--	--	0.28542	8.1453			--	--	0.31708	7.4567
	--	--			--	--	0.28569	8.1383			--	--	0.31736	7.452
	--	--			--	--	0.28597	8.1314			--	--	0.31764	7.4474
	--	--			--	--	0.28625	8.1244			--	--	0.31792	7.4428
	--	--			--	--	0.28653	8.1175			--	--	0.31819	7.4382
	--	--			--	--	0.28681	8.1106			--	--	0.31847	7.4336
	--	--			--	--	0.28708	8.1038			--	--	0.31875	7.429
	--	--			--	--	0.28736	8.0969			--	--	0.31903	7.4245
	--	--			--	--	0.28764	8.09			--	--	0.31931	7.4199
	--	--			--	--	0.28792	8.0832			--	--	0.31958	7.4153
	--	--			--	--	0.28819	8.0764			--	--	0.31986	7.4108
	--	--			--	--	0.28847	8.0696			--	--	0.32014	7.4063
	--	--			--	--	0.28875	8.0628			--	--	0.32042	7.4017
	--	--			--	--	0.28903	8.0561			--	--	0.32069	7.3972
	--	--			--	--	0.28931	8.0493			--	--	0.32097	7.3927
	--	--			--	--	0.28958	8.0426			--	--	0.32125	7.3882
	--	--			--	--	0.28986	8.0359			--	--	0.32153	7.3837
	--	--			--	--	0.29014	8.0292			--	--	0.32181	7.3792
	--	--			--	--	0.29042	8.0225			--	--	0.32208	7.3748
	--	--			--	--	0.29069	8.0158			--	--	0.32236	7.3703
	--	--			--	--	0.29097	8.0092			--	--	0.32264	7.3659
	--	--			--	--	0.29125	8.0025			--	--	0.32292	7.3614
	--	--			--	--	0.29153	7.9959			--	--	0.32319	7.357
	--	--			--	--	0.29181	7.9893			--	--	0.32347	7.3526
	--	--			--	--	0.29208	7.9827			--	--	0.32375	7.3481
	--	--			--	--	0.29236	7.9761			--	--	0.32403	7.3437
	--	--			--	--	0.29264	7.9696			--	--	0.32431	7.3393
	--	--			--	--	0.29292	7.9631			--	--	0.32458	7.3349
	--	--			--	--	0.29319	7.9565			--	--	0.32486	7.3306
	--	--			--	--	0.29347	7.95			--	--	0.32514	7.3262
	--	--			--	--	0.29375	7.9435			--	--	0.32542	7.3218
	--	--			--	--	0.29403	7.937			--	--	0.32569	7.3175
	--	--			--	--	0.29431	7.9306			--	--	0.32597	7.3131
	--	--			--	--	0.29458	7.9241			--	--	0.32625	7.3088
	--	--			--	--	0.29486	7.9177			--	--	0.32653	7.3045
	--	--			--	--	0.29514	7.9113			--	--	0.32681	7.3001
	--	--			--	--	0.29542	7.9049			--	--	0.32708	7.2958
	--	--			--	--	0.29569	7.8985			--	--	0.32736	7.2915
	--	--			--	--	0.29597	7.8921			--	--	0.32764	7.2873
	--	--			--	--	0.29625	7.8858			--	--	0.32792	7.283
	--	--			--	--	0.29653	7.8794			--	--	0.32819	7.2787
	--	--			--	--	0.29681	7.8731			--	--	0.32847	7.2744
	--	--			--	--	0.29708	7.8668			--	--	0.32875	7.2702
	--	--			--	--	0.29736	7.8605			--	--	0.32903	7.2659
	--	--			--	--	0.29764	7.8542			--	--	0.32931	7.2617
	--	--			--	--	0.29792	7.848			--	--	0.32958	7.2574
	--	--			--	--	0.29819	7.8417			--	--	0.32986	7.2532
	--	--			--	--	0.29847	7.8355			--	--	0.33014	7.249
	--	--			--	--	0.29875	7.8292			--	--	0.33042	7.2448
	--	--			--	--	0.29903	7.823			--	--	0.33069	7.2406
	--	--			--	--	0.29931	7.8169			--	--	0.33097	7.2364
	--	--			--	--	0.29958	7.8107			--	--	0.33125	7.2322
	--	--			--	--	0.29986	7.8045			--	--	0.33153	7.2281
	--	--			--	--	0.30014	7.7984			--	--	0.33181	7.2239
	--	--			--	--	0.30042	7.7922			--	--	0.33208	7.2198
	--	--			--	--	0.30069	7.7861			--	--	0.33236	7.2156
	--	--			--	--	0.30097	7.78			--	--	0.33264	7.2115
	--	--			--	--	0.30125	7.7739			--	--	0.33292	7.2073
	--	--			--	--	0.30153	7.7678			--	--	0.33319	7.2032
	--	--			--	--	0.30181	7.7618			--	--	0.33347	7.1991
	--	--			--	--	0.30208	7.7557			--	--	0.33375	7.195
	--	--			--	--	0.30236	7.7497			--	--	0.33403	7.1909
	--	--			--	--	0.30264	7.7437			--	--	0.33431	7.1868
	--	--			--	--	0.30292	7.7377			--	--	0.33458	7.1828
	--	--			--	--	0.30319	7.7317			--	--	0.33486	7.1787
	--	--			--	--	0.30347	7.7257			--	--	0.33514	7.1746
	--	--			--	--	0.30375	7.7198			--	--	0.33542	7.1706
	--	--			--	--	0.30403	7.7138			--	--	0.33569	7.1665
	--	--			--	--	0.30431	7.7079			--	--	0.33597	7.1625
	--	--			--	--	0.30458	7.702			--	--	0.33625	7.1585
	--	--			--	--	0.30486	7.6961			--	--	0.33653	7.1544
	--	--			--	--	0.30514	7.6902			--	--	0.33681	7.1504
	--	--			--	--	0.30542	7.6843			--	--	0.33708	7.1464
	--	--			--	--	0.30569	7.6784			--	--	0.33736	7.1424
	--	--			--	--	0.30597	7.6726			--	--	0.33764	7.1384
	--	--			--	--	0.30625	7.6668			--	--	0.33792	7.1345
	--	--			--	--	0.30653	7.6609			--	--	0.33819	7.1305
	--	--			--	--	0.30681	7.6551			--	--	0.33847	7.1265
	--	--			--	--	0.30708	7.6494			--	--	0.33875	7.1226
	--	--			--	--	0.30736	7.6436			--	--	0.33903	7.1186
	--	--			--	--	0.30764	7.6378			--	--	0.33931	7.1147
	--	--			--	--	0.30792	7.6321			--	--	0.33958	7.1108
	--	--			--	--	0.30819	7.6263			--	--	0.33986	7.1068
	--	--			--	--	0.30847	7.6206			--	--	0.34014	7.1029
	--	--			--	--	0.30875	7.6149			--	--	0.34042	7.099
	--	--			--	--	0.30903	7.6092			--	--	0.34069	7.0951
	--	--			--	--	0.30931	7.6035			--	--	0.34097	7.0912
	--	--			--	--	0.30958	7.5979			--	--	0.34125	7.0873
	--	--			--	--	0.30986	7.5922			--	--	0.34153	7.0835
	--	--			--	--	0.31014	7.5866			--	--	0.34181	7.0796
	--	--			--	--	0.31042	7.581			--	--	0.34208	7.0757
	--	--			--	--	0.31069	7.5754			--	--	0.34236	7.0719
	--	--			--	--	0.31097	7.5698			--	--	0.34264	7.068
	--	--			--	--	0.31125	7.5642			--	--	0.34292	7.0642
	--	--			--	--	0.31153	7.5586			--	--	0.34319	7.0604
	--	--			--	--	0.31181	7.5531			--	--	0.34347	7.0566
	--	--			--	--	0.31208	7.5475			--	--	0.34375	7.0528
	--	--			--	--	0.31236	7.542			--	--	0.34403	7.0489
	--	--			--	--	0.31264	7.5365			--	--	0.34431	7.0452
	--	--			--	--	0.31292	7.531			--	--	0.34458	7.0414
	--	--			--	--	0.31319	7.5255			--	--	0.34486	7.0376
	--	--			--	--	0.31347	7.52			--	--	0.34514	7.0338
	--	--			--	--	0.31375	7.5145			--	--	0.34542	7.03
	--	--			--	--	0.31403	7.5091			--	--	0.34569	7.0263
	--	--			--	--	0.31431	7.5036			--	--	0.34597	7.0225
	--	--			--	--	0.31458	7.4982			--	--	0.34625	7.0188
	--	--			--	--	0.31486	7.4928			--	--	0.34653	7.0151
	--	--			--	--	0.31514	7.4874			--	--	0.34681	7.0113
	--	--			--	--	0.31542	7.482			--	--	0.34708	7.0076
	--	--			--	--	0.31569	7.4767			--	--	0.34736	7.0039
	--	--			--	--	0.31597	7.4713			--	--	0.34764	7.0002
	--	--			--	--	0.31625	7.4659			--	--	0.34792	6.9965
	--	--			--	--	0.31653	7.4606			--	--	0.34819	6.9928
	--	--			--	--	0.31681	7.4553			--	--	0.34847	6.9891
	--	--			--	--	0.31708	7.45			--	--	0.34875	6.9855
	--	--			--	--	0.31736	7.4447			--	--	0.34903	6.9818
	--	--			--	--	0.31764	7.4394			--	--	0.34931	6.9781
	--	--			--	--	0.31792	7.4341			--	--	0.34958	6.9745
	--	--			--	--	0.31819	7.4289			--	--	0.34986	6.9708
	--	--			--	--	0.31847	7.4236			--	--	0.35014	6.9672
	--	--			--	--	0.31875	7.4184			--	--	0.35042	6.9636
	--	--			--	--	0.31903	7.4132			--	--	0.35069	6.9599
	--	--			--	--	0.31931	7.408			--	--	0.35097	6.9563
	--	--			--	--	0.31958	7.4028			--	--	0.35125	6.9527
	--	--			--	--	0.31986	7.3976			--	--	0.35153	6.9491
	--	--			--	--	0.32014	7.3924			--	--	0.35181	6.9455
	--	--			--	--	0.32042	7.3873			--	--	0.35208	6.9419
	--	--			--	--	0.32069	7.3821			--	--	0.35236	6.9384
	--	--			--	--	0.32097	7.377			--	--	0.35264	6.9348
	--	--			--	--	0.32125	7.3718			--	--	0.35292	6.9312
	--	--			--	--	0.32153	7.3667			--	--	0.35319	6.9277
	--	--			--	--	0.32181	7.3616			--	--	0.35347	6.9241
	--	--			--	--	0.32208	7.3565			--	--	0.35375	6.9206
	--	--			--	--	0.32236	7.3515			--	--	0.35403	6.9171
	--	--			--	--	0.32264	7.3464			--	--	0.35431	6.9135
	--	--			--	--	0.32292	7.3414			--	--	0.35458	6.91
	--	--			--	--	0.32319	7.3363			--	--	0.35486	6.9065
	--	--			--	--	0.32347	7.3313			--	--	0.35514	6.903
	--	--			--	--	0.32375	7.3263			--	--	0.35542	6.8995
	--	--			--	--	0.32403	7.3213			--	--	0.35569	6.896
	--	--			--	--	0.32431	7.3163			--	--	0.35597	6.8925
	--	--			--	--	0.32458	7.3113			--	--	0.35625	6.889
	--	--			--	--	0.32486	7.3063			--	--	0.35653	6.8856
	--	--			--	--	0.32514	7.3014			--	--	0.35681	6.8821
	--	--			--	--	0.32542	7.2965			--	--	0.35708	6.8787
	--	--			--	--	0.32569	7.2915			--	--	0.35736	6.8752
	--	--			--	--	0.32597	7.2866			--	--	0.35764	6.8718
	--	--			--	--	0.32625	7.2817			--	--	0.35792	6.8683
	--	--			--	--	0.32653	7.2768			--	--	0.35819	6.8649
	--	--			--	--	0.32681	7.2719			--	--	0.35847	6.8615
	--	--			--	--	0.32708	7.2671			--	--	0.35875	6.8581
	--	--			--	--	0.32736	7.2622			--	--	0.35903	6.8547
	--	--			--	--	0.32764	7.2573			--	--	0.35931	6.8513
	--	--			--	--	0.32792	7.2525			--	--	0.35958	6.8479
	--	--			--	--	0.32819	7.2477			--	--	0.35986	6.8445
	--	--			--	--	0.32847	7.2429			--	--	0.36014	6.8411
	--	--			--	--	0.32875	7.2381			--	--	0.36042	6.8377
	--	--			--	--	0.32903	7.2333			--	--	0.36069	6.8344
	--	--			--	--	0.32931	7.2285			--	--	0.36097	6.831
	--	--			--	--	0.32958	7.2237			--	--	0.36125	6.8277
	--	--			--	--	0.32986	7.219			--	--	0.36153	6.8243
	--	--			--	--	0.33014	7.2142			--	--	0.36181	6.821
	--	--			--	--	0.33042	7.2095			--	--	0.36208	6.8176
	--	--			--	--	0.33069	7.2048			--	--	0.36236	6.8143
	--	--			--	--	0.33097	7.2001			--	--	0.36264	6.811
	--	--			--	--	0.33125	7.1954			--	--	0.36292	6.8077
	--	--			--	--	0.33153	7.1907			--	--	0.36319	6.8044
	--	--			--	--	0.33181	7.186			--	--	0.36347	6.8011
	--	--			--	--	0.33208	7.1813			--	--	0.36375	6.7978
	--	--			--	--	0.33236	7.1767			--	--	0.36403	6.7945
	--	--			--	--	0.33264	7.172			--	--	0.36431	6.7912
	--	--			--	--	0.33292	7.1674			--	--	0.36458	6.788
	--	--			--	--	0.33319	7.1628			--	--	0.36486	6.7847
	--	--			--	--	0.33347	7.1582			--	--	0.36514	6.7814
	--	--			--	--	0.33375	7.1536			--	--	0.36542	6.7782
	--	--			--	--	0.33403	7.149			--	--	0.36569	6.7749
	--	--			--	--	0.33431	7.1444			--	--	0.36597	6.7717
	--	--			--	--	0.33458	7.1398			--	--	0.36625	6.7685
	--	--			--	--	0.33486	7.1353			--	--	0.36653	6.7652
	--	--			--	--	0.33514	7.1307			--	--	0.36681	6.762
	--	--			--	--	0.33542	7.1262			--	--	0.36708	6.7588
	--	--			--	--	0.33569	7.1217			--	--	0.36736	6.7556
	--	--			--	--	0.33597	7.1172			--	--	0.36764	6.7524
	--	--			--	--	0.33625	7.1126			--	--	0.36792	6.7492
	--	--			--	--	0.33653	7.1082			--	--	0.36819	6.746
	--	--			--	--	0.33681	7.1037			--	--	0.36847	6.7429
	--	--			--	--	0.33708	7.0992			--	--	0.36875	6.7397
	--	--			--	--	0.33736	7.0947			--	--	0.36903	6.7365
	--	--			--	--	0.33764	7.0903			--	--	0.36931	6.7334
	--	--			--	--	0.33792	7.0858			--	--	0.36958	6.7302
	--	--			--	--	0.33819	7.0814			--	--	0.36986	6.7271
	--	--			--	--	0.33847	7.077			--	--	0.37014	6.7239
	--	--			--	--	0.33875	7.0726			--	--	0.37042	6.7208
	--	--			--	--	0.33903	7.0682			--	--	0.37069	6.7177
	--	--			--	--	0.33931	7.0638			--	--	0.37097	6.7145
	--	--			--	--	0.33958	7.0594			--	--	0.37125	6.7114
	--	--			--	--	0.33986	7.0551			--	--	0.37153	6.7083
	--	--			--	--	0.34014	7.0507			--	--	0.37181	6.7052
	--	--			--	--	0.34042	7.0464			--	--	0.37208	6.7021
	--	--			--	--	0.34069	7.042			--	--	0.37236	6.699
	--	--			--	--	0.34097	7.0377			--	--	0.37264	6.6959
	--	--			--	--	0.34125	7.0334			--	--	0.37292	6.6929
	--	--			--	--	0.34153	7.0291			--	--	0.37319	6.6898
	--	--			--	--	0.34181	7.0248			--	--	0.37347	6.6867
	--	--			--	--	0.34208	7.0205			--	--	0.37375	6.6837
	--	--			--	--	0.34236	7.0162			--	--	0.37403	6.6806
	--	--			--	--	0.34264	7.012			--	--	0.37431	6.6776
	--	--			--	--	0.34292	7.0077			--	--	0.37458	6.6745
	--	--			--	--	0.34319	7.0035			--	--	0.37486	6.6715
	--	--			--	--	0.34347	6.9993			--	--	0.37514	6.6685
	--	--			--	--	0.34375	6.995			--	--	0.37542	6.6655
	--	--			--	--	0.34403	6.9908			--	--	0.37569	6.6624
	--	--			--	--	0.34431	6.9866			--	--	0.37597	6.6594
	--	--			--	--	0.34458	6.9824			--	--	0.37625	6.6564
	--	--			--	--	0.34486	6.9782			--	--	0.37653	6.6534
	--	--			--	--	0.34514	6.9741			--	--	0.37681	6.6504
	--	--			--	--	0.34542	6.9699			--	--	0.37708	6.6475
	--	--			--	--	0.34569	6.9658			--	--	0.37736	6.6445
	--	--			--	--	0.34597	6.9616			--	--	0.37764	6.6415
	--	--			--	--	0.34625	6.9575			--	--	0.37792	6.6385
	--	--			--	--	0.34653	6.9533			--	--	0.37819	6.6356
	--	--			--	--	0.34681	6.9492			--	--	0.37847	6.6326
	--	--			--	--	0.34708	6.9451			--	--	0.37875	6.6297
	--	--			--	--	0.34736	6.941			--	--	0.37903	6.6267
	--	--			--	--	0.34764	6.937			--	--	0.37931	6.6238
	--	--			--	--	0.34792	6.9329			--	--	0.37958	6.6209
	--	--			--	--	0.34819	6.9288			--	--	0.37986	6.618
	--	--			--	--	0.34847	6.9248			--	--	0.38014	6.615
	--	--			--	--	0.34875	6.9207			--	--	0.38042	6.6121
	--	--			--	--	0.34903	6.9167			--	--	0.38069	6.6092
	--	--			--	--	0.34931	6.9127			--	--	0.38097	6.6063
	--	--			--	--	0.34958	6.9086			--	--	0.38125	6.6034
	--	--			--	--	0.34986	6.9046			--	--	0.38153	6.6005
	--	--			--	--	0.35014	6.9006			--	--	0.38181	6.5976
	--	--			--	--	0.35042	6.8966			--	--	0.38208	6.5948
	--	--			--	--	0.35069	6.8927			--	--	0.38236	6.5919
	--	--			--	--	0.35097	6.8887			--	--	0.38264	6.589
	--	--			--	--	0.35125	6.8847			--	--	0.38292	6.5862
	--	--			--	--	0.35153	6.8808			--	--	0.38319	6.5833
	--	--			--	--	0.35181	6.8768			--	--	0.38347	6.5805
	--	--			--	--	0.35208	6.8729			--	--	0.38375	6.5776
	--	--			--	--	0.35236	6.869			--	--	0.38403	6.5748
	--	--			--	--	0.35264	6.8651			--	--	0.38431	6.572
	--	--			--	--	0.35292	6.8612			--	--	0.38458	6.5691
	--	--			--	--	0.35319	6.8573			--	--	0.38486	6.5663
	--	--			--	--	0.35347	6.8534			--	--	0.38514	6.5635
	--	--			--	--	0.35375	6.8495			--	--	0.38542	6.5607
	--	--			--	--	0.35403	6.8456			--	--	0.38569	6.5579
	--	--			--	--	0.35431	6.8418			--	--	0.38597	6.5551
	--	--			--	--	0.35458	6.8379			--	--	0.38625	6.5523
	--	--			--	--	0.35486	6.8341			--	--	0.38653	6.5495
	--	--			--	--	0.35514	6.8302			--	--	0.38681	6.5467
	--	--			--	--	0.35542	6.8264			--	--	0.38708	6.544
	--	--			--	--	0.35569	6.8226			--	--	0.38736	6.5412
	--	--			--	--	0.35597	6.8188			--	--	0.38764	6.5384
	--	--			--	--	0.35625	6.815			--	--	0.38792	6.5357
	--	--			--	--	0.35653	6.8112			--	--	0.38819	6.5329
	--	--			--	--	0.35681	6.8074			--	--	0.38847	6.5302
	--	--			--	--	0.35708	6.8037			--	--	0.38875	6.5274
	--	--			--	--	0.35736	6.7999			--	--	0.38903	6.5247
	--	--			--	--	0.35764	6.7962			--	--	0.38931	6.522
	--	--			--	--	0.35792	6.7924			--	--	0.38958	6.5192
	--	--			--	--	0.35819	6.7887			--	--	0.38986	6.5165
	--	--			--	--	0.35847	6.785			--	--	0.39014	6.5138
	--	--			--	--	0.35875	6.7812			--	--	0.39042	6.5111
	--	--			--	--	0.35903	6.7775			--	--	0.39069	6.5084
	--	--			--	--	0.35931	6.7738			--	--	0.39097	6.5057
	--	--			--	--	0.35958	6.7702			--	--	0.39125	6.503
	--	--			--	--	0.35986	6.7665			--	--	0.39153	6.5003
	--	--			--	--	0.36014	6.7628			--	--	0.39181	6.4976
	--	--			--	--	0.36042	6.7591			--	--	0.39208	6.495
	--	--			--	--	0.36069	6.7555			--	--	0.39236	6.4923
	--	--			--	--	0.36097	6.7518			--	--	0.39264	6.4896
	--	--			--	--	0.36125	6.7482			--	--	0.39292	6.487
	--	--			--	--	0.36153	6.7446			--	--	0.39319	6.4843
	--	--			--	--	0.36181	6.7409			--	--	0.39347	6.4817
	--	--			--	--	0.36208	6.7373			--	--	0.39375	6.479
	--	--			--	--	0.36236	6.7337			--	--	0.39403	6.4764
	--	--			--	--	0.36264	6.7301			--	--	0.39431	6.4738
	--	--			--	--	0.36292	6.7265			--	--	0.39458	6.4712
	--	--			--	--	0.36319	6.723			--	--	0.39486	6.4685
	--	--			--	--	0.36347	6.7194			--	--	0.39514	6.4659
	--	--			--	--	0.36375	6.7158			--	--	0.39542	6.4633
	--	--			--	--	0.36403	6.7123			--	--	0.39569	6.4607
	--	--			--	--	0.36431	6.7087			--	--	0.39597	6.4581
	--	--			--	--	0.36458	6.7052			--	--	0.39625	6.4555
	--	--			--	--	0.36486	6.7017			--	--	0.39653	6.4529
	--	--			--	--	0.36514	6.6982			--	--	0.39681	6.4503
	--	--			--	--	0.36542	6.6947			--	--	0.39708	6.4478
	--	--			--	--	0.36569	6.6912			--	--	0.39736	6.4452
	--	--			--	--	0.36597	6.6877			--	--	0.39764	6.4426
	--	--			--	--	0.36625	6.6842			--	--	0.39792	6.44
	--	--			--	--	0.36653	6.6807			--	--	0.39819	6.4375
	--	--			--	--	0.36681	6.6772			--	--	0.39847	6.4349
	--	--			--	--	0.36708	6.6738			--	--	0.39875	6.4324
	--	--			--	--	0.36736	6.6703			--	--	0.39903	6.4298
	--	--			--	--	0.36764	6.6669			--	--	0.39931	6.4273
	--	--			--	--	0.36792	6.6634			--	--	0.39958	6.4248
	--	--			--	--	0.36819	6.66			--	--	0.39986	6.4222
	--	--			--	--	0.36847	6.6566			--	--	0.40014	6.4197
	--	--			--	--	0.36875	6.6532			--	--	0.40042	6.4172
	--	--			--	--	0.36903	6.6498			--	--	0.40069	6.4147
	--	--			--	--	0.36931	6.6464			--	--	0.40097	6.4122
	--	--			--	--	0.36958	6.643			--	--	0.40125	6.4097
	--	--			--	--	0.36986	6.6396			--	--	0.40153	6.4072
	--	--			--	--	0.37014	6.6362			--	--	0.40181	6.4047
	--	--			--	--	0.37042	6.6329			--	--	0.40208	6.4022
	--	--			--	--	0.37069	6.6295			--	--	0.40236	6.3997
	--	--			--	--	0.37097	6.6262			--	--	0.40264	6.3972
	--	--			--	--	0.37125	6.6228			--	--	0.40292	6.3948
	--	--			--	--	0.37153	6.6195			--	--	0.40319	6.3923
	--	--			--	--	0.37181	6.6161			--	--	0.40347	6.3898
	--	--			--	--	0.37208	6.6128			--	--	0.40375	6.3874
	--	--			--	--	0.37236	6.6095			--	--	0.40403	6.3849
	--	--			--	--	0.37264	6.6062			--	--	0.40431	6.3825
	--	--			--	--	0.37292	6.6029			--	--	0.40458	6.38
	--	--			--	--	0.37319	6.5996			--	--	0.40486	6.3776
	--	--			--	--	0.37347	6.5964			--	--	0.40514	6.3752
	--	--			--	--	0.37375	6.5931			--	--	0.40542	6.3727
	--	--			--	--	0.37403	6.5898			--	--	0.40569	6.3703
	--	--			--	--	0.37431	6.5866			--	--	0.40597	6.3679
	--	--			--	--	0.37458	6.5833			--	--	0.40625	6.3655
	--	--			--	--	0.37486	6.5801			--	--	0.40653	6.3631
	--	--			--	--	0.37514	6.5768			--	--	0.40681	6.3607
	--	--			--	--	0.37542	6.5736			--	--	0.40708	6.3583
	--	--			--	--	0.37569	6.5704			--	--	0.40736	6.3559
	--	--			--	--	0.37597	6.5672			--	--	0.40764	6.3535
	--	--			--	--	0.37625	6.564			--	--	0.40792	6.3511
	--	--			--	--	0.37653	6.5608			--	--	0.40819	6.3487
	--	--			--	--	0.37681	6.5576			--	--	0.40847	6.3463
	--	--			--	--	0.37708	6.5544			--	--	0.40875	6.344
	--	--			--	--	0.37736	6.5512			--	--	0.40903	6.3416
	--	--			--	--	0.37764	6.5481			--	--	0.40931	6.3392
	--	--			--	--	0.37792	6.5449			--	--	0.40958	6.3369
	--	--			--	--	0.37819	6.5417			--	--	0.40986	6.3345
	--	--			--	--	0.37847	6.5386			--	--	0.41014	6.3322
	--	--			--	--	0.37875	6.5355			--	--	0.41042	6.3298
	--	--			--	--	0.37903	6.5323			--	--	0.41069	6.3275
	--	--			--	--	0.37931	6.5292			--	--	0.41097	6.3252
	--	--			--	--	0.37958	6.5261			--	--	0.41125	6.3229
	--	--			--	--	0.37986	6.523			--	--	0.41153	6.3205
	--	--			--	--	0.38014	6.5199			--	--	0.41181	6.3182
	--	--			--	--	0.38042	6.5168			--	--	0.41208	6.3159
	--	--			--	--	0.38069	6.5137			--	--	0.41236	6.3136
	--	--			--	--	0.38097	6.5106			--	--	0.41264	6.3113
	--	--			--	--	0.38125	6.5076			--	--	0.41292	6.309
	--	--			--	--	0.38153	6.5045			--	--	0.41319	6.3067
	--	--			--	--	0.38181	6.5015			--	--	0.41347	6.3044
	--	--			--	--	0.38208	6.4984			--	--	0.41375	6.3021
	--	--			--	--	0.38236	6.4954			--	--	0.41403	6.2998
	--	--			--	--	0.38264	6.4923			--	--	0.41431	6.2976
	--	--			--	--	0.38292	6.4893			--	--	0.41458	6.2953
	--	--			--	--	0.38319	6.4863			--	--	0.41486	6.293
	--	--			--	--	0.38347	6.4832			--	--	0.41514	6.2908
	--	--			--	--	0.38375	6.4802			--	--	0.41542	6.2885
	--	--			--	--	0.38403	6.4772			--	--	0.41569	6.2863
	--	--			--	--	0.38431	6.4742			--	--	0.41597	6.284
	--	--			--	--	0.38458	6.4712			--	--	0.41625	6.2818
	--	--			--	--	0.38486	6.4682			--	--	0.41653	6.2795
	--	--			--	--	0.38514	6.4653			--	--	0.41681	6.2773
	--	--			--	--	0.38542	6.4623			--	--	0.41708	6.2751
	--	--			--	--	0.38569	6.4594			--	--	0.41736	6.2728
	--	--			--	--	0.38597	6.4564			--	--	0.41764	6.2706
	--	--			--	--	0.38625	6.4535			--	--	0.41792	6.2684
	--	--			--	--	0.38653	6.4505			--	--	0.41819	6.2662
	--	--			--	--	0.38681	6.4476			--	--	0.41847	6.264
	--	--			--	--	0.38708	6.4447			--	--	0.41875	6.2618
	--	--			--	--	0.38736	6.4418			--	--	0.41903	6.2596
	--	--			--	--	0.38764	6.4389			--	--	0.41931	6.2574
	--	--			--	--	0.38792	6.436			--	--	0.41958	6.2552
	--	--			--	--	0.38819	6.4331			--	--	0.41986	6.253
	--	--			--	--	0.38847	6.4302			--	--	0.42014	6.2508
	--	--			--	--	0.38875	6.4273			--	--	0.42042	6.2486
	--	--			--	--	0.38903	6.4244			--	--	0.42069	6.2464
	--	--			--	--	0.38931	6.4215			--	--	0.42097	6.2443
	--	--			--	--	0.38958	6.4186			--	--	0.42125	6.2421
	--	--			--	--	0.38986	6.4158			--	--	0.42153	6.24
	--	--			--	--	0.39014	6.4129			--	--	0.42181	6.2378
	--	--			--	--	0.39042	6.4101			--	--	0.42208	6.2356
	--	--			--	--	0.39069	6.4072			--	--	0.42236	6.2335
	--	--			--	--	0.39097	6.4044			--	--	0.42264	6.2314
	--	--			--	--	0.39125	6.4016			--	--	0.42292	6.2292
	--	--			--	--	0.39153	6.3988			--	--	0.42319	6.2271
	--	--			--	--	0.39181	6.396			--	--	0.42347	6.2249
	--	--			--	--	0.39208	6.3931			--	--	0.42375	6.2228
	--	--			--	--	0.39236	6.3903			--	--	0.42403	6.2207
	--	--			--	--	0.39264	6.3876			--	--	0.42431	6.2186
	--	--			--	--	0.39292	6.3848			--	--	0.42458	6.2165
	--	--			--	--	0.39319	6.382			--	--	0.42486	6.2144
	--	--			--	--	0.39347	6.3792			--	--	0.42514	6.2122
	--	--			--	--	0.39375	6.3765			--	--	0.42542	6.2101
	--	--			--	--	0.39403	6.3737			--	--	0.42569	6.2081
	--	--			--	--	0.39431	6.371			--	--	0.42597	6.206
	--	--			--	--	0.39458	6.3682			--	--	0.42625	6.2039
	--	--			--	--	0.39486	6.3655			--	--	0.42653	6.2018
	--	--			--	--	0.39514	6.3627			--	--	0.42681	6.1997
	--	--			--	--	0.39542	6.36			--	--	0.42708	6.1976
	--	--			--	--	0.39569	6.3573			--	--	0.42736	6.1956
	--	--			--	--	0.39597	6.3546			--	--	0.42764	6.1935
	--	--			--	--	0.39625	6.3519			--	--	0.42792	6.1914
	--	--			--	--	0.39653	6.3492			--	--	0.42819	6.1894
	--	--			--	--	0.39681	6.3465			--	--	0.42847	6.1873
	--	--			--	--	0.39708	6.3438			--	--	0.42875	6.1853
	--	--			--	--	0.39736	6.3411			--	--	0.42903	6.1832
	--	--			--	--	0.39764	6.3384			--	--	0.42931	6.1812
	--	--			--	--	0.39792	6.3357			--	--	0.42958	6.1791
	--	--			--	--	0.39819	6.3331			--	--	0.42986	6.1771
	--	--			--	--	0.39847	6.3304			--	--	0.43014	6.1751
	--	--			--	--	0.39875	6.3278			--	--	0.43042	6.173
	--	--			--	--	0.39903	6.3251			--	--	0.43069	6.171
	--	--			--	--	0.39931	6.3225			--	--	0.43097	6.169
	--	--			--	--	0.39958	6.3198			--	--	0.43125	6.167
	--	--			--	--	0.39986	6.3172			--	--	0.43153	6.165
	--	--			--	--	0.40014	6.3146			--	--	0.43181	6.163
	--	--			--	--	0.40042	6.312			--	--	0.43208	6.161
	--	--			--	--	0.40069	6.3094			--	--	0.43236	6.159
	--	--			--	--	0.40097	6.3068			--	--	0.43264	6.157
	--	--			--	--	0.40125	6.3042			--	--	0.43292	6.155
	--	--			--	--	0.40153	6.3016			--	--	0.43319	6.153
	--	--			--	--	0.40181	6.299			--	--	0.43347	6.151
	--	--			--	--	0.40208	6.2964			--	--	0.43375	6.149
	--	--			--	--	0.40236	6.2938			--	--	0.43403	6.147
	--	--			--	--	0.40264	6.2913			--	--	0.43431	6.1451
	--	--			--	--	0.40292	6.2887			--	--	0.43458	6.1431
	--	--			--	--	0.40319	6.2861			--	--	0.43486	6.1411
	--	--			--	--	0.40347	6.2836			--	--	0.43514	6.1392
	--	--			--	--	0.40375	6.281			--	--	0.43542	6.1372
	--	--			--	--	0.40403	6.2785			--	--	0.43569	6.1353
	--	--			--	--	0.40431	6.276			--	--	0.43597	6.1333
	--	--			--	--	0.40458	6.2734			--	--	0.43625	6.1314
	--	--			--	--	0.40486	6.2709			--	--	0.43653	6.1294
	--	--			--	--	0.40514	6.2684			--	--	0.43681	6.1275
	--	--			--	--	0.40542	6.2659			--	--	0.43708	6.1256
	--	--			--	--	0.40569	6.2634			--	--	0.43736	6.1236
	--	--			--	--	0.40597	6.2609			--	--	0.43764	6.1217
	--	--			--	--	0.40625	6.2584			--	--	0.43792	6.1198
	--	--			--	--	0.40653	6.2559			--	--	0.43819	6.1179
	--	--			--	--	0.40681	6.2534			--	--	0.43847	6.116
	--	--			--	--	0.40708	6.251			--	--	0.43875	6.1141
	--	--			--	--	0.40736	6.2485			--	--	0.43903	6.1121
	--	--			--	--	0.40764	6.246			--	--	0.43931	6.1102
	--	--			--	--	0.40792	6.2436			--	--	0.43958	6.1083
	--	--			--	--	0.40819	6.2411			--	--	0.43986	6.1065
	--	--			--	--	0.40847	6.2387			--	--	0.44014	6.1046
	--	--			--	--	0.40875	6.2362			--	--	0.44042	6.1027
	--	--			--	--	0.40903	6.2338			--	--	0.44069	6.1008
	--	--			--	--	0.40931	6.2314			--	--	0.44097	6.0989
	--	--			--	--	0.40958	6.2289			--	--	0.44125	6.097
	--	--			--	--	0.40986	6.2265			--	--	0.44153	6.0952
	--	--			--	--	0.41014	6.2241			--	--	0.44181	6.0933
	--	--			--	--	0.41042	6.2217			--	--	0.44208	6.0914
	--	--			--	--	0.41069	6.2193			--	--	0.44236	6.0896
	--	--			--	--	0.41097	6.2169			--	--	0.44264	6.0877
	--	--			--	--	0.41125	6.2145			--	--	0.44292	6.0859
	--	--			--	--	0.41153	6.2121			--	--	0.44319	6.084
	--	--			--	--	0.41181	6.2098			--	--	0.44347	6.0822
	--	--			--	--	0.41208	6.2074			--	--	0.44375	6.0803
	--	--			--	--	0.41236	6.205			--	--	0.44403	6.0785
	--	--			--	--	0.41264	6.2026			--	--	0.44431	6.0766
	--	--			--	--	0.41292	6.2003			--	--	0.44458	6.0748
	--	--			--	--	0.41319	6.1979			--	--	0.44486	6.073
	--	--			--	--	0.41347	6.1956			--	--	0.44514	6.0711
	--	--			--	--	0.41375	6.1932			--	--	0.44542	6.0693
	--	--			--	--	0.41403	6.1909			--	--	0.44569	6.0675
	--	--			--	--	0.41431	6.1886			--	--	0.44597	6.0657
	--	--			--	--	0.41458	6.1862			--	--	0.44625	6.0639
	--	--			--	--	0.41486	6.1839			--	--	0.44653	6.0621
	--	--			--	--	0.41514	6.1816			--	--	0.44681	6.0603
	--	--			--	--	0.41542	6.1793			--	--	0.44708	6.0585
	--	--			--	--	0.41569	6.177			--	--	0.44736	6.0567
	--	--			--	--	0.41597	6.1747			--	--	0.44764	6.0549
	--	--			--	--	0.41625	6.1724			--	--	0.44792	6.0531
	--	--			--	--	0.41653	6.1701			--	--	0.44819	6.0513
	--	--			--	--	0.41681	6.1678			--	--	0.44847	6.0495
	--	--			--	--	0.41708	6.1656			--	--	0.44875	6.0477
	--	--			--	--	0.41736	6.1633			--	--	0.44903	6.046
	--	--			--	--	0.41764	6.161			--	--	0.44931	6.0442
	--	--			--	--	0.41792	6.1587			--	--	0.44958	6.0424
	--	--			--	--	0.41819	6.1565			--	--	0.44986	6.0407
	--	--			--	--	0.41847	6.1542			--	--	0.45014	6.0389
	--	--			--	--	0.41875	6.152			--	--	0.45042	6.0371
	--	--			--	--	0.41903	6.1497			--	--	0.45069	6.0354
	--	--			--	--	0.41931	6.1475			--	--	0.45097	6.0336
	--	--			--	--	0.41958	6.1453			--	--	0.45125	6.0319
	--	--			--	--	0.41986	6.1431			--	--	0.45153	6.0302
	--	--			--	--	0.42014	6.1408			--	--	0.45181	6.0284
	--	--			--	--	0.42042	6.1386			--	--	0.45208	6.0267
	--	--			--	--	0.42069	6.1364			--	--	0.45236	6.0249
	--	--			--	--	0.42097	6.1342			--	--	0.45264	6.0232
	--	--			--	--	0.42125	6.132			--	--	0.45292	6.0215
	--	--			--	--	0.42153	6.1298			--	--	0.45319	6.0198
	--	--			--	--	0.42181	6.1276			--	--	0.45347	6.018
	--	--			--	--	0.42208	6.1254			--	--	0.45375	6.0163
	--	--			--	--	0.42236	6.1232			--	--	0.45403	6.0146
	--	--			--	--	0.42264	6.1211			--	--	0.45431	6.0129
	--	--			--	--	0.42292	6.1189			--	--	0.45458	6.0112
	--	--			--	--	0.42319	6.1167			--	--	0.45486	6.0095
	--	--			--	--	0.42347	6.1145			--	--	0.45514	6.0078
	--	--			--	--	0.42375	6.1124			--	--	0.45542	6.0061
	--	--			--	--	0.42403	6.1102			--	--	0.45569	6.0044
	--	--			--	--	0.42431	6.1081			--	--	0.45597	6.0027
	--	--			--	--	0.42458	6.1059			--	--	0.45625	6.001
	--	--			--	--	0.42486	6.1038			--	--	0.45653	5.9994
	--	--			--	--	0.42514	6.1017			--	--	0.45681	5.9977
	--	--			--	--	0.42542	6.0996			--	--	0.45708	5.996
	--	--			--	--	0.42569	6.0974			--	--	0.45736	5.9943
	--	--			--	--	0.42597	6.0953			--	--	0.45764	5.9927
	--	--			--	--	0.42625	6.0932			--	--	0.45792	5.991
	--	--			--	--	0.42653	6.0911			--	--	0.45819	5.9893
	--	--			--	--	0.42681	6.089			--	--	0.45847	5.9877
	--	--			--	--	0.42708	6.0869			--	--	0.45875	5.986
	--	--			--	--	0.42736	6.0848			--	--	0.45903	5.9844
	--	--			--	--	0.42764	6.0827			--	--	0.45931	5.9827
	--	--			--	--	0.42792	6.0806			--	--	0.45958	5.9811
	--	--			--	--	0.42819	6.0785			--	--	0.45986	5.9794
	--	--			--	--	0.42847	6.0765			--	--	0.46014	5.9778
	--	--			--	--	0.42875	6.0744			--	--	0.46042	5.9761
	--	--			--	--	0.42903	6.0723			--	--	0.46069	5.9745
	--	--			--	--	0.42931	6.0703			--	--	0.46097	5.9729
	--	--			--	--	0.42958	6.0682			--	--	0.46125	5.9713
	--	--			--	--	0.42986	6.0662			--	--	0.46153	5.9696
	--	--			--	--	0.43014	6.0641			--	--	0.46181	5.968
	--	--			--	--	0.43042	6.0621			--	--	0.46208	5.9664
	--	--			--	--	0.43069	6.06			--	--	0.46236	5.9648
	--	--			--	--	0.43097	6.058			--	--	0.46264	5.9632
	--	--			--	--	0.43125	6.056			--	--	0.46292	5.9616
	--	--			--	--	0.43153	6.0539			--	--	0.46319	5.9599
	--	--			--	--	0.43181	6.0519			--	--	0.46347	5.9583
	--	--			--	--	0.43208	6.0499			--	--	0.46375	5.9567
	--	--			--	--	0.43236	6.0479			--	--	0.46403	5.9551
	--	--			--	--	0.43264	6.0459			--	--	0.46431	5.9536
	--	--			--	--	0.43292	6.0439			--	--	0.46458	5.952
	--	--			--	--	0.43319	6.0419			--	--	0.46486	5.9504
	--	--			--	--	0.43347	6.0399			--	--	0.46514	5.9488
	--	--			--	--	0.43375	6.0379			--	--	0.46542	5.9472
	--	--			--	--	0.43403	6.0359			--	--	0.46569	5.9456
	--	--			--	--	0.43431	6.034			--	--	0.46597	5.9441
	--	--			--	--	0.43458	6.032			--	--	0.46625	5.9425
	--	--			--	--	0.43486	6.03			--	--	0.46653	5.9409
	--	--			--	--	0.43514	6.028			--	--	0.46681	5.9394
	--	--			--	--	0.43542	6.0261			--	--	0.46708	5.9378
	--	--			--	--	0.43569	6.0241			--	--	0.46736	5.9362
	--	--			--	--	0.43597	6.0222			--	--	0.46764	5.9347
	--	--			--	--	0.43625	6.0202			--	--	0.46792	5.9331
	--	--			--	--	0.43653	6.0183			--	--	0.46819	5.9316
	--	--			--	--	0.43681	6.0163			--	--	0.46847	5.93
	--	--			--	--	0.43708	6.0144			--	--	0.46875	5.9285
	--	--			--	--	0.43736	6.0125			--	--	0.46903	5.9269
	--	--			--	--	0.43764	6.0105			--	--	0.46931	5.9254
	--	--			--	--	0.43792	6.0086			--	--	0.46958	5.9239
	--	--			--	--	0.43819	6.0067			--	--	0.46986	5.9223
	--	--			--	--	0.43847	6.0048			--	--	0.47014	5.9208
	--	--			--	--	0.43875	6.0029			--	--	0.47042	5.9193
	--	--			--	--	0.43903	6.001			--	--	0.47069	5.9178
	--	--			--	--	0.43931	5.9991			--	--	0.47097	5.9162
	--	--			--	--	0.43958	5.9972			--	--	0.47125	5.9147
	--	--			--	--	0.43986	5.9953			--	--	0.47153	5.9132
	--	--			--	--	0.44014	5.9934			--	--	0.47181	5.9117
	--	--			--	--	0.44042	5.9915			--	--	0.47208	5.9102
	--	--			--	--	0.44069	5.9896			--	--	0.47236	5.9087
	--	--			--	--	0.44097	5.9878			--	--	0.47264	5.9072
	--	--			--	--	0.44125	5.9859			--	--	0.47292	5.9057
	--	--			--	--	0.44153	5.984			--	--	0.47319	5.9042
	--	--			--	--	0.44181	5.9822			--	--	0.47347	5.9027
	--	--			--	--	0.44208	5.9803			--	--	0.47375	5.9012
	--	--			--	--	0.44236	5.9785			--	--	0.47403	5.8997
	--	--			--	--	0.44264	5.9766			--	--	0.47431	5.8982
	--	--			--	--	0.44292	5.9748			--	--	0.47458	5.8968
	--	--			--	--	0.44319	5.9729			--	--	0.47486	5.8953
	--	--			--	--	0.44347	5.9711			--	--	0.47514	5.8938
	--	--			--	--	0.44375	5.9693			--	--	0.47542	5.8923
	--	--			--	--	0.44403	5.9674			--	--	0.47569	5.8909
	--	--			--	--	0.44431	5.9656			--	--	0.47597	5.8894
	--	--			--	--	0.44458	5.9638			--	--	0.47625	5.8879
	--	--			--	--	0.44486	5.962			--	--	0.47653	5.8864
	--	--			--	--	0.44514	5.9602			--	--	0.47681	5.885
	--	--			--	--	0.44542	5.9583			--	--	0.47708	5.8835
	--	--			--	--	0.44569	5.9565			--	--	0.47736	5.8821
	--	--			--	--	0.44597	5.9547			--	--	0.47764	5.8806
	--	--			--	--	0.44625	5.9529			--	--	0.47792	5.8792
	--	--			--	--	0.44653	5.9512			--	--	0.47819	5.8777
	--	--			--	--	0.44681	5.9494			--	--	0.47847	5.8763
	--	--			--	--	0.44708	5.9476			--	--	0.47875	5.8748
	--	--			--	--	0.44736	5.9458			--	--	0.47903	5.8734
	--	--			--	--	0.44764	5.944			--	--	0.47931	5.872
	--	--			--	--	0.44792	5.9423			--	--	0.47958	5.8706
	--	--			--	--	0.44819	5.9405			--	--	0.47986	5.8691
	--	--			--	--	0.44847	5.9387			--	--	0.48014	5.8677
	--	--			--	--	0.44875	5.937			--	--	0.48042	5.8663
	--	--			--	--	0.44903	5.9352			--	--	0.48069	5.8649
	--	--			--	--	0.44931	5.9335			--	--	0.48097	5.8634
	--	--			--	--	0.44958	5.9317			--	--	0.48125	5.862
	--	--			--	--	0.44986	5.93			--	--	0.48153	5.8606
	--	--			--	--	0.45014	5.9282			--	--	0.48181	5.8592
	--	--			--	--	0.45042	5.9265			--	--	0.48208	5.8578
	--	--			--	--	0.45069	5.9248			--	--	0.48236	5.8564
	--	--			--	--	0.45097	5.923			--	--	0.48264	5.855
	--	--			--	--	0.45125	5.9213			--	--	0.48292	5.8536
	--	--			--	--	0.45153	5.9196			--	--	0.48319	5.8522
	--	--			--	--	0.45181	5.9179			--	--	0.48347	5.8508
	--	--			--	--	0.45208	5.9161			--	--	0.48375	5.8494
	--	--			--	--	0.45236	5.9144			--	--	0.48403	5.848
	--	--			--	--	0.45264	5.9127			--	--	0.48431	5.8466
	--	--			--	--	0.45292	5.911			--	--	0.48458	5.8453
	--	--			--	--	0.45319	5.9093			--	--	0.48486	5.8439
	--	--			--	--	0.45347	5.9076			--	--	0.48514	5.8425
	--	--			--	--	0.45375	5.906			--	--	0.48542	5.8411
	--	--			--	--	0.45403	5.9043			--	--	0.48569	5.8398
	--	--			--	--	0.45431	5.9026			--	--	0.48597	5.8384
	--	--			--	--	0.45458	5.9009			--	--	0.48625	5.837
	--	--			--	--	0.45486	5.8992			--	--	0.48653	5.8357
	--	--			--	--	0.45514	5.8976			--	--	0.48681	5.8343
	--	--			--	--	0.45542	5.8959			--	--	0.48708	5.8329
	--	--			--	--	0.45569	5.8942			--	--	0.48736	5.8316
	--	--			--	--	0.45597	5.8926			--	--	0.48764	5.8302
	--	--			--	--	0.45625	5.8909			--	--	0.48792	5.8289
	--	--			--	--	0.45653	5.8893			--	--	0.48819	5.8275
	--	--			--	--	0.45681	5.8876			--	--	0.48847	5.8262
	--	--			--	--	0.45708	5.886			--	--	0.48875	5.8248
	--	--			--	--	0.45736	5.8843			--	--	0.48903	5.8235
	--	--			--	--	0.45764	5.8827			--	--	0.48931	5.8222
	--	--			--	--	0.45792	5.8811			--	--	0.48958	5.8208
	--	--			--	--	0.45819	5.8794			--	--	0.48986	5.8195
	--	--			--	--	0.45847	5.8778			--	--	0.49014	5.8182
	--	--			--	--	0.45875	5.8762			--	--	0.49042	5.8168
	--	--			--	--	0.45903	5.8746			--	--	0.49069	5.8155
	--	--			--	--	0.45931	5.8729			--	--	0.49097	5.8142
	--	--			--	--	0.45958	5.8713			--	--	0.49125	5.8129
	--	--			--	--	0.45986	5.8697			--	--	0.49153	5.8116
	--	--			--	--	0.46014	5.8681			--	--	0.49181	5.8102
	--	--			--	--	0.46042	5.8665			--	--	0.49208	5.8089
	--	--			--	--	0.46069	5.8649			--	--	0.49236	5.8076
	--	--			--	--	0.46097	5.8633			--	--	0.49264	5.8063
	--	--			--	--	0.46125	5.8617			--	--	0.49292	5.805
	--	--			--	--	0.46153	5.8601			--	--	0.49319	5.8037
	--	--			--	--	0.46181	5.8586			--	--	0.49347	5.8024
	--	--			--	--	0.46208	5.857			--	--	0.49375	5.8011
	--	--			--	--	0.46236	5.8554			--	--	0.49403	5.7998
	--	--			--	--	0.46264	5.8538			--	--	0.49431	5.7985
	--	--			--	--	0.46292	5.8523			--	--	0.49458	5.7972
	--	--			--	--	0.46319	5.8507			--	--	0.49486	5.7959
	--	--			--	--	0.46347	5.8491			--	--	0.49514	5.7946
	--	--			--	--	0.46375	5.8476			--	--	0.49542	5.7934
	--	--			--	--	0.46403	5.846			--	--	0.49569	5.7921
	--	--			--	--	0.46431	5.8445			--	--	0.49597	5.7908
	--	--			--	--	0.46458	5.8429			--	--	0.49625	5.7895
	--	--			--	--	0.46486	5.8414			--	--	0.49653	5.7883
	--	--			--	--	0.46514	5.8398			--	--	0.49681	5.787
	--	--			--	--	0.46542	5.8383			--	--	0.49708	5.7857
	--	--			--	--	0.46569	5.8367			--	--	0.49736	5.7845
	--	--			--	--	0.46597	5.8352			--	--	0.49764	5.7832
	--	--			--	--	0.46625	5.8337			--	--	0.49792	5.7819
	--	--			--	--	0.46653	5.8322			--	--	0.49819	5.7807
	--	--			--	--	0.46681	5.8306			--	--	0.49847	5.7794
	--	--			--	--	0.46708	5.8291			--	--	0.49875	5.7782
	--	--			--	--	0.46736	5.8276			--	--	0.49903	5.7769
	--	--			--	--	0.46764	5.8261			--	--	0.49931	5.7757
	--	--			--	--	0.46792	5.8246			--	--	0.49958	5.7744
	--	--			--	--	0.46819	5.8231			--	--	0.49986	5.7732
	--	--			--	--	0.46847	5.8216			--	--	0.50014	5.7719
	--	--			--	--	0.46875	5.8201			--	--	0.50042	5.7707
	--	--			--	--	0.46903	5.8186			--	--	0.50069	5.7695
	--	--			--	--	0.46931	5.8171			--	--	0.50097	5.7682
	--	--			--	--	0.46958	5.8156			--	--	0.50125	5.767
	--	--			--	--	0.46986	5.8141			--	--	0.50153	5.7658
	--	--			--	--	0.47014	5.8126			--	--	0.50181	5.7645
	--	--			--	--	0.47042	5.8112			--	--	0.50208	5.7633
	--	--			--	--	0.47069	5.8097			--	--	0.50236	5.7621
	--	--			--	--	0.47097	5.8082			--	--	0.50264	5.7609
	--	--			--	--	0.47125	5.8067			--	--	0.50292	5.7597
	--	--			--	--	0.47153	5.8053			--	--	0.50319	5.7584
	--	--			--	--	0.47181	5.8038			--	--	0.50347	5.7572
	--	--			--	--	0.47208	5.8024			--	--	0.50375	5.756
	--	--			--	--	0.47236	5.8009			--	--	0.50403	5.7548
	--	--			--	--	0.47264	5.7994			--	--	0.50431	5.7536
	--	--			--	--	0.47292	5.798			--	--	0.50458	5.7524
	--	--			--	--	0.47319	5.7965			--	--	0.50486	5.7512
	--	--			--	--	0.47347	5.7951			--	--	0.50514	5.75
	--	--			--	--	0.47375	5.7937			--	--	0.50542	5.7488
	--	--			--	--	0.47403	5.7922			--	--	0.50569	5.7476
	--	--			--	--	0.47431	5.7908			--	--	0.50597	5.7464
	--	--			--	--	0.47458	5.7893			--	--	0.50625	5.7452
	--	--			--	--	0.47486	5.7879			--	--	0.50653	5.744
	--	--			--	--	0.47514	5.7865			--	--	0.50681	5.7429
	--	--			--	--	0.47542	5.7851			--	--	0.50708	5.7417
	--	--			--	--	0.47569	5.7837			--	--	0.50736	5.7405
	--	--			--	--	0.47597	5.7822			--	--	0.50764	5.7393
	--	--			--	--	0.47625	5.7808			--	--	0.50792	5.7381
	--	--			--	--	0.47653	5.7794			--	--	0.50819	5.737
	--	--			--	--	0.47681	5.778			--	--	0.50847	5.7358
	--	--			--	--	0.47708	5.7766			--	--	0.50875	5.7346
	--	--			--	--	0.47736	5.7752			--	--	0.50903	5.7334
	--	--			--	--	0.47764	5.7738			--	--	0.50931	5.7323
	--	--			--	--	0.47792	5.7724			--	--	0.50958	5.7311
	--	--			--	--	0.47819	5.771			--	--	0.50986	5.73
	--	--			--	--	0.47847	5.7696			--	--	0.51014	5.7288
	--	--			--	--	0.47875	5.7682			--	--	0.51042	5.7276
	--	--			--	--	0.47903	5.7669			--	--	0.51069	5.7265
	--	--			--	--	0.47931	5.7655			--	--	0.51097	5.7253
	--	--			--	--	0.47958	5.7641			--	--	0.51125	5.7242
	--	--			--	--	0.47986	5.7628			--	--	0.51153	5.723
	--	--			--	--	0.48014	5.7614			--	--	0.51181	5.7219
	--	--			--	--	0.48042	5.76			--	--	0.51208	5.7207
	--	--			--	--	0.48069	5.7586			--	--	0.51236	5.7196
	--	--			--	--	0.48097	5.7573			--	--	0.51264	5.7185
	--	--			--	--	0.48125	5.7559			--	--	0.51292	5.7173
	--	--			--	--	0.48153	5.7546			--	--	0.51319	5.7162
	--	--			--	--	0.48181	5.7532			--	--	0.51347	5.7151
	--	--			--	--	0.48208	5.7519			--	--	0.51375	5.7139
	--	--			--	--	0.48236	5.7505			--	--	0.51403	5.7128
	--	--			--	--	0.48264	5.7492			--	--	0.51431	5.7117
	--	--			--	--	0.48292	5.7478			--	--	0.51458	5.7105
	--	--			--	--	0.48319	5.7465			--	--	0.51486	5.7094
	--	--			--	--	0.48347	5.7452			--	--	0.51514	5.7083
	--	--			--	--	0.48375	5.7438			--	--	0.51542	5.7072
	--	--			--	--	0.48403	5.7425			--	--	0.51569	5.7061
	--	--			--	--	0.48431	5.7412			--	--	0.51597	5.7049
	--	--			--	--	0.48458	5.7398			--	--	0.51625	5.7038
	--	--			--	--	0.48486	5.7385			--	--	0.51653	5.7027
	--	--			--	--	0.48514	5.7372			--	--	0.51681	5.7016
	--	--			--	--	0.48542	5.7359			--	--	0.51708	5.7005
	--	--			--	--	0.48569	5.7346			--	--	0.51736	5.6994
	--	--			--	--	0.48597	5.7333			--	--	0.51764	5.6983
	--	--			--	--	0.48625	5.732			--	--	0.51792	5.6972
	--	--			--	--	0.48653	5.7307			--	--	0.51819	5.6961
	--	--			--	--	0.48681	5.7294			--	--	0.51847	5.695
	--	--			--	--	0.48708	5.7281			--	--	0.51875	5.6939
	--	--			--	--	0.48736	5.7268			--	--	0.51903	5.6928
	--	--			--	--	0.48764	5.7255			--	--	0.51931	5.6917
	--	--			--	--	0.48792	5.7242			--	--	0.51958	5.6906
	--	--			--	--	0.48819	5.7229			--	--	0.51986	5.6896
	--	--			--	--	0.48847	5.7216			--	--	0.52014	5.6885
	--	--			--	--	0.48875	5.7204			--	--	0.52042	5.6874
	--	--			--	--	0.48903	5.7191			--	--	0.52069	5.6863
	--	--			--	--	0.48931	5.7178			--	--	0.52097	5.6852
	--	--			--	--	0.48958	5.7165			--	--	0.52125	5.6842
	--	--			--	--	0.48986	5.7153			--	--	0.52153	5.6831
	--	--			--	--	0.49014	5.714			--	--	0.52181	5.682
	--	--			--	--	0.49042	5.7127			--	--	0.52208	5.681
	--	--			--	--	0.49069	5.7115			--	--	0.52236	5.6799
	--	--			--	--	0.49097	5.7102			--	--	0.52264	5.6788
	--	--			--	--	0.49125	5.709			--	--	0.52292	5.6778
	--	--			--	--	0.49153	5.7077			--	--	0.52319	5.6767
	--	--			--	--	0.49181	5.7065			--	--	0.52347	5.6756
	--	--			--	--	0.49208	5.7052			--	--	0.52375	5.6746
	--	--			--	--	0.49236	5.704			--	--	0.52403	5.6735
	--	--			--	--	0.49264	5.7027			--	--	0.52431	5.6725
	--	--			--	--	0.49292	5.7015			--	--	0.52458	5.6714
	--	--			--	--	0.49319	5.7003			--	--	0.52486	5.6704
	--	--			--	--	0.49347	5.699			--	--	0.52514	5.6693
	--	--			--	--	0.49375	5.6978			--	--	0.52542	5.6683
	--	--			--	--	0.49403	5.6966			--	--	0.52569	5.6672
	--	--			--	--	0.49431	5.6953			--	--	0.52597	5.6662
	--	--			--	--	0.49458	5.6941			--	--	0.52625	5.6652
	--	--			--	--	0.49486	5.6929			--	--	0.52653	5.6641
	--	--			--	--	0.49514	5.6917			--	--	0.52681	5.6631
	--	--			--	--	0.49542	5.6905			--	--	0.52708	5.6621
	--	--			--	--	0.49569	5.6892			--	--	0.52736	5.661
	--	--			--	--	0.49597	5.688			--	--	0.52764	5.66
	--	--			--	--	0.49625	5.6868			--	--	0.52792	5.659
	--	--			--	--	0.49653	5.6856			--	--	0.52819	5.6579
	--	--			--	--	0.49681	5.6844			--	--	0.52847	5.6569
	--	--			--	--	0.49708	5.6832			--	--	0.52875	5.6559
	--	--			--	--	0.49736	5.682			--	--	0.52903	5.6549
	--	--			--	--	0.49764	5.6808			--	--	0.52931	5.6539
	--	--			--	--	0.49792	5.6796			--	--	0.52958	5.6528
	--	--			--	--	0.49819	5.6785			--	--	0.52986	5.6518
	--	--			--	--	0.49847	5.6773			--	--	0.53014	5.6508
	--	--			--	--	0.49875	5.6761			--	--	0.53042	5.6498
	--	--			--	--	0.49903	5.6749			--	--	0.53069	5.6488
	--	--			--	--	0.49931	5.6737			--	--	0.53097	5.6478
	--	--			--	--	0.49958	5.6725			--	--	0.53125	5.6468
	--	--			--	--	0.49986	5.6714			--	--	0.53153	5.6458
	--	--			--	--	0.50014	5.6702			--	--	0.53181	5.6448
	--	--			--	--	0.50042	5.669			--	--	0.53208	5.6438
	--	--			--	--	0.50069	5.6679			--	--	0.53236	5.6428
	--	--			--	--	0.50097	5.6667			--	--	0.53264	5.6418
	--	--			--	--	0.50125	5.6655			--	--	0.53292	5.6408
	--	--			--	--	0.50153	5.6644			--	--	0.53319	5.6398
	--	--			--	--	0.50181	5.6632			--	--	0.53347	5.6388
	--	--			--	--	0.50208	5.6621			--	--	0.53375	5.6378
	--	--			--	--	0.50236	5.6609			--	--	0.53403	5.6368
	--	--			--	--	0.50264	5.6598			--	--	0.53431	5.6358
	--	--			--	--	0.50292	5.6586			--	--	0.53458	5.6349
	--	--			--	--	0.50319	5.6575			--	--	0.53486	5.6339
	--	--			--	--	0.50347	5.6563			--	--	0.53514	5.6329
	--	--			--	--	0.50375	5.6552			--	--	0.53542	5.6319
	--	--			--	--	0.50403	5.654			--	--	0.53569	5.6309
	--	--			--	--	0.50431	5.6529			--	--	0.53597	5.63
	--	--			--	--	0.50458	5.6518			--	--	0.53625	5.629
	--	--			--	--	0.50486	5.6506			--	--	0.53653	5.628
	--	--			--	--	0.50514	5.6495			--	--	0.53681	5.6271
	--	--			--	--	0.50542	5.6484			--	--	0.53708	5.6261
	--	--			--	--	0.50569	5.6473			--	--	0.53736	5.6251
	--	--			--	--	0.50597	5.6462			--	--	0.53764	5.6242
	--	--			--	--	0.50625	5.645			--	--	0.53792	5.6232
	--	--			--	--	0.50653	5.6439			--	--	0.53819	5.6222
	--	--			--	--	0.50681	5.6428			--	--	0.53847	5.6213
	--	--			--	--	0.50708	5.6417			--	--	0.53875	5.6203
	--	--			--	--	0.50736	5.6406			--	--	0.53903	5.6194
	--	--			--	--	0.50764	5.6395			--	--	0.53931	5.6184
	--	--			--	--	0.50792	5.6384			--	--	0.53958	5.6175
	--	--			--	--	0.50819	5.6373			--	--	0.53986	5.6165
	--	--			--	--	0.50847	5.6362			--	--	0.54014	5.6156
	--	--			--	--	0.50875	5.6351			--	--	0.54042	5.6146
	--	--			--	--	0.50903	5.634			--	--	0.54069	5.6137
	--	--			--	--	0.50931	5.6329			--	--	0.54097	5.6127
	--	--			--	--	0.50958	5.6318			--	--	0.54125	5.6118
	--	--			--	--	0.50986	5.6307			--	--	0.54153	5.6109
	--	--			--	--	0.51014	5.6296			--	--	0.54181	5.6099
	--	--			--	--	0.51042	5.6285			--	--	0.54208	5.609
	--	--			--	--	0.51069	5.6275			--	--	0.54236	5.6081
	--	--			--	--	0.51097	5.6264			--	--	0.54264	5.6071
	--	--			--	--	0.51125	5.6253			--	--	0.54292	5.6062
	--	--			--	--	0.51153	5.6242			--	--	0.54319	5.6053
	--	--			--	--	0.51181	5.6232			--	--	0.54347	5.6043
	--	--			--	--	0.51208	5.6221			--	--	0.54375	5.6034
	--	--			--	--	0.51236	5.621			--	--	0.54403	5.6025
	--	--			--	--	0.51264	5.62			--	--	0.54431	5.6016
	--	--			--	--	0.51292	5.6189			--	--	0.54458	5.6006
	--	--			--	--	0.51319	5.6178			--	--	0.54486	5.5997
	--	--			--	--	0.51347	5.6168			--	--	0.54514	5.5988
	--	--			--	--	0.51375	5.6157			--	--	0.54542	5.5979
	--	--			--	--	0.51403	5.6147			--	--	0.54569	5.597
	--	--			--	--	0.51431	5.6136			--	--	0.54597	5.5961
	--	--			--	--	0.51458	5.6126			--	--	0.54625	5.5952
	--	--			--	--	0.51486	5.6115			--	--	0.54653	5.5943
	--	--			--	--	0.51514	5.6105			--	--	0.54681	5.5933
	--	--			--	--	0.51542	5.6094			--	--	0.54708	5.5924
	--	--			--	--	0.51569	5.6084			--	--	0.54736	5.5915
	--	--			--	--	0.51597	5.6074			--	--	0.54764	5.5906
	--	--			--	--	0.51625	5.6063			--	--	0.54792	5.5897
	--	--			--	--	0.51653	5.6053			--	--	0.54819	5.5888
	--	--			--	--	0.51681	5.6043			--	--	0.54847	5.588
	--	--			--	--	0.51708	5.6032			--	--	0.54875	5.5871
	--	--			--	--	0.51736	5.6022			--	--	0.54903	5.5862
	--	--			--	--	0.51764	5.6012			--	--	0.54931	5.5853
	--	--			--	--	0.51792	5.6002			--	--	0.54958	5.5844
	--	--			--	--	0.51819	5.5991			--	--	0.54986	5.5835
	--	--			--	--	0.51847	5.5981			--	--	0.55014	5.5826
	--	--			--	--	0.51875	5.5971			--	--	0.55042	5.5817
	--	--			--	--	0.51903	5.5961			--	--	0.55069	5.5808
	--	--			--	--	0.51931	5.5951			--	--	0.55097	5.58
	--	--			--	--	0.51958	5.5941			--	--	0.55125	5.5791
	--	--			--	--	0.51986	5.5931			--	--	0.55153	5.5782
	--	--			--	--	0.52014	5.5921			--	--	0.55181	5.5773
	--	--			--	--	0.52042	5.591			--	--	0.55208	5.5764
	--	--			--	--	0.52069	5.59			--	--	0.55236	5.5756
	--	--			--	--	0.52097	5.589			--	--	0.55264	5.5747
	--	--			--	--	0.52125	5.588			--	--	0.55292	5.5738
	--	--			--	--	0.52153	5.5871			--	--	0.55319	5.573
	--	--			--	--	0.52181	5.5861			--	--	0.55347	5.5721
	--	--			--	--	0.52208	5.5851			--	--	0.55375	5.5712
	--	--			--	--	0.52236	5.5841			--	--	0.55403	5.5704
	--	--			--	--	0.52264	5.5831			--	--	0.55431	5.5695
	--	--			--	--	0.52292	5.5821			--	--	0.55458	5.5686
	--	--			--	--	0.52319	5.5811			--	--	0.55486	5.5678
	--	--			--	--	0.52347	5.5801			--	--	0.55514	5.5669
	--	--			--	--	0.52375	5.5792			--	--	0.55542	5.5661
	--	--			--	--	0.52403	5.5782			--	--	0.55569	5.5652
	--	--			--	--	0.52431	5.5772			--	--	0.55597	5.5644
	--	--			--	--	0.52458	5.5763			--	--	0.55625	5.5635
	--	--			--	--	0.52486	5.5753			--	--	0.55653	5.5627
	--	--			--	--	0.52514	5.5743			--	--	0.55681	5.5618
	--	--			--	--	0.52542	5.5733			--	--	0.55708	5.561
	--	--			--	--	0.52569	5.5724			--	--	0.55736	5.5601
	--	--			--	--	0.52597	5.5714			--	--	0.55764	5.5593
	--	--			--	--	0.52625	5.5705			--	--	0.55792	5.5584
	--	--			--	--	0.52653	5.5695			--	--	0.55819	5.5576
	--	--			--	--	0.52681	5.5685			--	--	0.55847	5.5567
	--	--			--	--	0.52708	5.5676			--	--	0.55875	5.5559
	--	--			--	--	0.52736	5.5666			--	--	0.55903	5.5551
	--	--			--	--	0.52764	5.5657			--	--	0.55931	5.5542
	--	--			--	--	0.52792	5.5647			--	--	0.55958	5.5534
	--	--			--	--	0.52819	5.5638			--	--	0.55986	5.5526
	--	--			--	--	0.52847	5.5629			--	--	0.56014	5.5518
	--	--			--	--	0.52875	5.5619			--	--	0.56042	5.5509
	--	--			--	--	0.52903	5.561			--	--	0.56069	5.5501
	--	--			--	--	0.52931	5.56			--	--	0.56097	5.5493
	--	--			--	--	0.52958	5.5591			--	--	0.56125	5.5484
	--	--			--	--	0.52986	5.5582			--	--	0.56153	5.5476
	--	--			--	--	0.53014	5.5572			--	--	0.56181	5.5468
	--	--			--	--	0.53042	5.5563			--	--	0.56208	5.546
	--	--			--	--	0.53069	5.5554			--	--	0.56236	5.5452
	--	--			--	--	0.53097	5.5544			--	--	0.56264	5.5443
	--	--			--	--	0.53125	5.5535			--	--	0.56292	5.5435
	--	--			--	--	0.53153	5.5526			--	--	0.56319	5.5427
	--	--			--	--	0.53181	5.5517			--	--	0.56347	5.5419
	--	--			--	--	0.53208	5.5508			--	--	0.56375	5.5411
	--	--			--	--	0.53236	5.5498			--	--	0.56403	5.5403
	--	--			--	--	0.53264	5.5489			--	--	0.56431	5.5395
	--	--			--	--	0.53292	5.548			--	--	0.56458	5.5387
	--	--			--	--	0.53319	5.5471			--	--	0.56486	5.5379
	--	--			--	--	0.53347	5.5462			--	--	0.56514	5.5371
	--	--			--	--	0.53375	5.5453			--	--	0.56542	5.5363
	--	--			--	--	0.53403	5.5444			--	--	0.56569	5.5355
	--	--			--	--	0.53431	5.5435			--	--	0.56597	5.5347
	--	--			--	--	0.53458	5.5426			--	--	0.56625	5.5339
	--	--			--	--	0.53486	5.5417			--	--	0.56653	5.5331
	--	--			--	--	0.53514	5.5408			--	--	0.56681	5.5323
	--	--			--	--	0.53542	5.5399			--	--	0.56708	5.5315
	--	--			--	--	0.53569	5.539			--	--	0.56736	5.5307
	--	--			--	--	0.53597	5.5381			--	--	0.56764	5.5299
	--	--			--	--	0.53625	5.5372			--	--	0.56792	5.5291
	--	--			--	--	0.53653	5.5363			--	--	0.56819	5.5283
	--	--			--	--	0.53681	5.5354			--	--	0.56847	5.5275
	--	--			--	--	0.53708	5.5345			--	--	0.56875	5.5267
	--	--			--	--	0.53736	5.5336			--	--	0.56903	5.526
	--	--			--	--	0.53764	5.5328			--	--	0.56931	5.5252
	--	--			--	--	0.53792	5.5319			--	--	0.56958	5.5244
	--	--			--	--	0.53819	5.531			--	--	0.56986	5.5236
	--	--			--	--	0.53847	5.5301			--	--	0.57014	5.5228
	--	--			--	--	0.53875	5.5292			--	--	0.57042	5.5221
	--	--			--	--	0.53903	5.5284			--	--	0.57069	5.5213
	--	--			--	--	0.53931	5.5275			--	--	0.57097	5.5205
	--	--			--	--	0.53958	5.5266			--	--	0.57125	5.5197
	--	--			--	--	0.53986	5.5258			--	--	0.57153	5.519
	--	--			--	--	0.54014	5.5249			--	--	0.57181	5.5182
	--	--			--	--	0.54042	5.524			--	--	0.57208	5.5174
	--	--			--	--	0.54069	5.5232			--	--	0.57236	5.5167
	--	--			--	--	0.54097	5.5223			--	--	0.57264	5.5159
	--	--			--	--	0.54125	5.5215			--	--	0.57292	5.5151
	--	--			--	--	0.54153	5.5206			--	--	0.57319	5.5144
	--	--			--	--	0.54181	5.5197			--	--	0.57347	5.5136
	--	--			--	--	0.54208	5.5189			--	--	0.57375	5.5128
	--	--			--	--	0.54236	5.518			--	--	0.57403	5.5121
	--	--			--	--	0.54264	5.5172			--	--	0.57431	5.5113
	--	--			--	--	0.54292	5.5163			--	--	0.57458	5.5106
	--	--			--	--	0.54319	5.5155			--	--	0.57486	5.5098
	--	--			--	--	0.54347	5.5146			--	--	0.57514	5.5091
	--	--			--	--	0.54375	5.5138			--	--	0.57542	5.5083
	--	--			--	--	0.54403	5.513			--	--	0.57569	5.5076
	--	--			--	--	0.54431	5.5121			--	--	0.57597	5.5068
	--	--			--	--	0.54458	5.5113			--	--	0.57625	5.5061
	--	--			--	--	0.54486	5.5104			--	--	0.57653	5.5053
	--	--			--	--	0.54514	5.5096			--	--	0.57681	5.5046
	--	--			--	--	0.54542	5.5088			--	--	0.57708	5.5038
	--	--			--	--	0.54569	5.5079			--	--	0.57736	5.5031
	--	--			--	--	0.54597	5.5071			--	--	0.57764	5.5023
	--	--			--	--	0.54625	5.5063			--	--	0.57792	5.5016
	--	--			--	--	0.54653	5.5055			--	--	0.57819	5.5008
	--	--			--	--	0.54681	5.5046			--	--	0.57847	5.5001
	--	--			--	--	0.54708	5.5038			--	--	0.57875	5.4994
	--	--			--	--	0.54736	5.503			--	--	0.57903	5.4986
	--	--			--	--	0.54764	5.5022			--	--	0.57931	5.4979
	--	--			--	--	0.54792	5.5013			--	--	0.57958	5.4972
	--	--			--	--	0.54819	5.5005			--	--	0.57986	5.4964
	--	--			--	--	0.54847	5.4997			--	--	0.58014	5.4957
	--	--			--	--	0.54875	5.4989			--	--	0.58042	5.495
	--	--			--	--	0.54903	5.4981			--	--	0.58069	5.4942
	--	--			--	--	0.54931	5.4973			--	--	0.58097	5.4935
	--	--			--	--	0.54958	5.4965			--	--	0.58125	5.4928
	--	--			--	--	0.54986	5.4957			--	--	0.58153	5.4921
	--	--			--	--	0.55014	5.4949			--	--	0.58181	5.4913
	--	--			--	--	0.55042	5.4941			--	--	0.58208	5.4906
	--	--			--	--	0.55069	5.4933			--	--	0.58236	5.4899
	--	--			--	--	0.55097	5.4925			--	--	0.58264	5.4892
	--	--			--	--	0.55125	5.4917			--	--	0.58292	5.4885
	--	--			--	--	0.55153	5.4909			--	--	0.58319	5.4878
	--	--			--	--	0.55181	5.4901			--	--	0.58347	5.4871
	--	--			--	--	0.55208	5.4893			--	--	0.58375	5.4863
	--	--			--	--	0.55236	5.4885			--	--	0.58403	5.4856
	--	--			--	--	0.55264	5.4877			--	--	0.58431	5.4849
	--	--			--	--	0.55292	5.4869			--	--	0.58458	5.4842
	--	--			--	--	0.55319	5.4861			--	--	0.58486	5.4835
	--	--			--	--	0.55347	5.4853			--	--	0.58514	5.4828
	--	--			--	--	0.55375	5.4846			--	--	0.58542	5.4821
	--	--			--	--	0.55403	5.4838			--	--	0.58569	5.4814
	--	--			--	--	0.55431	5.483			--	--	0.58597	5.4807
	--	--			--	--	0.55458	5.4822			--	--	0.58625	5.48
	--	--			--	--	0.55486	5.4814			--	--	0.58653	5.4793
[truncated: 25,009 more rows]

## Sheet: fig11
figure 11a	calculated data				measured data					figure 11a	calculated data				measured data
	t(h)	b(m)	t(h)	B(m)	t(h)	b(m)	t(h)	B(m)			t(h)	b(m)	t(h)	B(m)	t(h)	b(m)	t(h)	B(m)
	0.00014	0.1001	0.00014	0.1001	2.59347	5.1	2.59347	9			0.00014	0.1001	0.00014	0.1001	2.59347	4.6	2.59347	9.3
	0.00042	0.1639	0.00042	0.1639							0.00042	0.1002	0.00042	0.1003
	0.00069	0.1647	0.00069	0.1647							0.00069	0.1004	0.00069	0.1004
	0.00097	0.1655	0.00097	0.1655							0.00097	0.1006	0.00097	0.1006
	0.00125	0.1663	0.00125	0.1663							0.00125	0.1008	0.00125	0.1008
	0.00153	0.167	0.00153	0.167							0.00153	0.101	0.00153	0.101
	0.00181	0.1678	0.00181	0.1678							0.00181	0.1012	0.00181	0.1012
	0.00208	0.1686	0.00208	0.1686							0.00208	0.1013	0.00208	0.1013
	0.00236	0.1694	0.00236	0.1694							0.00236	0.1015	0.00236	0.1015
	0.00264	0.1702	0.00264	0.1702							0.00264	0.1017	0.00264	0.1017
	0.00292	0.171	0.00292	0.171							0.00292	0.1019	0.00292	0.1019
	0.00319	0.1718	0.00319	0.1718							0.00319	0.1021	0.00319	0.1021
	0.00347	0.1726	0.00347	0.1726							0.00347	0.1022	0.00347	0.1022
	0.00375	0.1734	0.00375	0.1734							0.00375	0.1024	0.00375	0.1024
	0.00403	0.1742	0.00403	0.1742							0.00403	0.1026	0.00403	0.1026
	0.00431	0.175	0.00431	0.175							0.00431	0.1028	0.00431	0.1028
	0.00458	0.1758	0.00458	0.1758							0.00458	0.103	0.00458	0.103
	0.00486	0.1766	0.00486	0.1766							0.00486	0.1032	0.00486	0.1032
	0.00514	0.1774	0.00514	0.1774							0.00514	0.1033	0.00514	0.1033
	0.00542	0.1782	0.00542	0.1782							0.00542	0.1035	0.00542	0.1035
	0.00569	0.179	0.00569	0.1791							0.00569	0.1037	0.00569	0.1037
	0.00597	0.1799	0.00597	0.1799							0.00597	0.1039	0.00597	0.1039
	0.00625	0.1807	0.00625	0.1807							0.00625	0.1041	0.00625	0.1041
	0.00653	0.1815	0.00653	0.1815							0.00653	0.1043	0.00653	0.1043
	0.00681	0.1823	0.00681	0.1823							0.00681	0.1044	0.00681	0.1044
	0.00708	0.1832	0.00708	0.1832							0.00708	0.1046	0.00708	0.1046
	0.00736	0.184	0.00736	0.184							0.00736	0.1048	0.00736	0.1048
	0.00764	0.1848	0.00764	0.1848							0.00764	0.105	0.00764	0.105
	0.00792	0.1857	0.00792	0.1857							0.00792	0.1052	0.00792	0.1052
	0.00819	0.1865	0.00819	0.1865							0.00819	0.1054	0.00819	0.1054
	0.00847	0.1874	0.00847	0.1874							0.00847	0.1055	0.00847	0.1055
	0.00875	0.1882	0.00875	0.1882							0.00875	0.1057	0.00875	0.1057
	0.00903	0.189	0.00903	0.189							0.00903	0.1059	0.00903	0.1059
	0.00931	0.1899	0.00931	0.1899							0.00931	0.1061	0.00931	0.1061
	0.00958	0.1907	0.00958	0.1907							0.00958	0.1063	0.00958	0.1063
	0.00986	0.1916	0.00986	0.1916							0.00986	0.1065	0.00986	0.1065
	0.01014	0.1925	0.01014	0.1925							0.01014	0.1067	0.01014	0.1067
	0.01042	0.1933	0.01042	0.1933							0.01042	0.1068	0.01042	0.1068
	0.01069	0.1942	0.01069	0.1942							0.01069	0.107	0.01069	0.107
	0.01097	0.195	0.01097	0.195							0.01097	0.1072	0.01097	0.1072
	0.01125	0.1959	0.01125	0.1959							0.01125	0.1074	0.01125	0.1074
	0.01153	0.1968	0.01153	0.1968							0.01153	0.1076	0.01153	0.1076
	0.01181	0.1976	0.01181	0.1977							0.01181	0.1078	0.01181	0.1078
	0.01208	0.1985	0.01208	0.1985							0.01208	0.108	0.01208	0.108
	0.01236	0.1994	0.01236	0.1994							0.01236	0.1081	0.01236	0.1081
	0.01264	0.2003	0.01264	0.2003							0.01264	0.1083	0.01264	0.1083
	0.01292	0.2012	0.01292	0.2012							0.01292	0.1085	0.01292	0.1085
	0.01319	0.202	0.01319	0.202							0.01319	0.1087	0.01319	0.1087
	0.01347	0.2029	0.01347	0.2029							0.01347	0.1089	0.01347	0.1089
	0.01375	0.2038	0.01375	0.2038							0.01375	0.1091	0.01375	0.1091
	0.01403	0.2047	0.01403	0.2047							0.01403	0.1093	0.01403	0.1093
	0.01431	0.2056	0.01431	0.2056							0.01431	0.1094	0.01431	0.1095
	0.01458	0.2065	0.01458	0.2065							0.01458	0.1096	0.01458	0.1096
	0.01486	0.2074	0.01486	0.2074							0.01486	0.1098	0.01486	0.1098
	0.01514	0.2083	0.01514	0.2083							0.01514	0.11	0.01514	0.11
	0.01542	0.2092	0.01542	0.2092							0.01542	0.1102	0.01542	0.1102
	0.01569	0.2101	0.01569	0.2101							0.01569	0.1104	0.01569	0.1104
	0.01597	0.211	0.01597	0.211							0.01597	0.1106	0.01597	0.1106
	0.01625	0.212	0.01625	0.212							0.01625	0.1108	0.01625	0.1108
	0.01653	0.2129	0.01653	0.2129							0.01653	0.111	0.01653	0.111
	0.01681	0.2138	0.01681	0.2138							0.01681	0.1111	0.01681	0.1112
	0.01708	0.2147	0.01708	0.2147							0.01708	0.1113	0.01708	0.1113
	0.01736	0.2156	0.01736	0.2156							0.01736	0.1115	0.01736	0.1115
	0.01764	0.2166	0.01764	0.2166							0.01764	0.1117	0.01764	0.1117
	0.01792	0.2175	0.01792	0.2175							0.01792	0.1119	0.01792	0.1119
	0.01819	0.2184	0.01819	0.2184							0.01819	0.1121	0.01819	0.1121
	0.01847	0.2194	0.01847	0.2194							0.01847	0.1123	0.01847	0.1123
	0.01875	0.2203	0.01875	0.2203							0.01875	0.1125	0.01875	0.1125
	0.01903	0.2212	0.01903	0.2212							0.01903	0.1127	0.01903	0.1127
	0.01931	0.2222	0.01931	0.2222							0.01931	0.1129	0.01931	0.1129
	0.01958	0.2231	0.01958	0.2231							0.01958	0.113	0.01958	0.1131
	0.01986	0.2241	0.01986	0.2241							0.01986	0.1132	0.01986	0.1132
	0.02014	0.225	0.02014	0.225							0.02014	0.1134	0.02014	0.1134
	0.02042	0.226	0.02042	0.226							0.02042	0.1136	0.02042	0.1136
	0.02069	0.227	0.02069	0.227							0.02069	0.1138	0.02069	0.1138
	0.02097	0.2279	0.02097	0.2279							0.02097	0.114	0.02097	0.114
	0.02125	0.2289	0.02125	0.2289							0.02125	0.1142	0.02125	0.1142
	0.02153	0.2298	0.02153	0.2299							0.02153	0.1144	0.02153	0.1144
	0.02181	0.2308	0.02181	0.2308							0.02181	0.1146	0.02181	0.1146
	0.02208	0.2318	0.02208	0.2318							0.02208	0.1148	0.02208	0.1148
	0.02236	0.2328	0.02236	0.2328							0.02236	0.115	0.02236	0.115
	0.02264	0.2337	0.02264	0.2338							0.02264	0.1152	0.02264	0.1152
	0.02292	0.2347	0.02292	0.2347							0.02292	0.1154	0.02292	0.1154
	0.02319	0.2357	0.02319	0.2357							0.02319	0.1155	0.02319	0.1156
	0.02347	0.2367	0.02347	0.2367							0.02347	0.1157	0.02347	0.1157
	0.02375	0.2377	0.02375	0.2377							0.02375	0.1159	0.02375	0.1159
	0.02403	0.2387	0.02403	0.2387							0.02403	0.1161	0.02403	0.1161
	0.02431	0.2397	0.02431	0.2397							0.02431	0.1163	0.02431	0.1163
	0.02458	0.2407	0.02458	0.2407							0.02458	0.1165	0.02458	0.1165
	0.02486	0.2417	0.02486	0.2417							0.02486	0.1167	0.02486	0.1167
	0.02514	0.2427	0.02514	0.2427							0.02514	0.1169	0.02514	0.1169
	0.02542	0.2437	0.02542	0.2437							0.02542	0.1171	0.02542	0.1171
	0.02569	0.2447	0.02569	0.2447							0.02569	0.1173	0.02569	0.1173
	0.02597	0.2457	0.02597	0.2457							0.02597	0.1175	0.02597	0.1175
	0.02625	0.2467	0.02625	0.2467							0.02625	0.1177	0.02625	0.1177
	0.02653	0.2478	0.02653	0.2478							0.02653	0.1179	0.02653	0.1179
	0.02681	0.2488	0.02681	0.2488							0.02681	0.1181	0.02681	0.1181
	0.02708	0.2498	0.02708	0.2498							0.02708	0.1183	0.02708	0.1183
	0.02736	0.2508	0.02736	0.2508							0.02736	0.1185	0.02736	0.1185
	0.02764	0.2519	0.02764	0.2519							0.02764	0.1187	0.02764	0.1187
	0.02792	0.2529	0.02792	0.2529							0.02792	0.1189	0.02792	0.1189
	0.02819	0.2539	0.02819	0.254							0.02819	0.1191	0.02819	0.1191
	0.02847	0.255	0.02847	0.255							0.02847	0.1193	0.02847	0.1193
	0.02875	0.256	0.02875	0.256							0.02875	0.1195	0.02875	0.1195
	0.02903	0.2571	0.02903	0.2571							0.02903	0.1197	0.02903	0.1197
	0.02931	0.2581	0.02931	0.2581							0.02931	0.1199	0.02931	0.1199
	0.02958	0.2592	0.02958	0.2592							0.02958	0.1201	0.02958	0.1201
	0.02986	0.2602	0.02986	0.2603							0.02986	0.1203	0.02986	0.1203
	0.03014	0.2613	0.03014	0.2613							0.03014	0.1205	0.03014	0.1205
	0.03042	0.2624	0.03042	0.2624							0.03042	0.1206	0.03042	0.1207
	0.03069	0.2634	0.03069	0.2634							0.03069	0.1208	0.03069	0.1209
	0.03097	0.2645	0.03097	0.2645							0.03097	0.121	0.03097	0.1211
	0.03125	0.2656	0.03125	0.2656							0.03125	0.1212	0.03125	0.1213
	0.03153	0.2667	0.03153	0.2667							0.03153	0.1214	0.03153	0.1215
	0.03181	0.2677	0.03181	0.2677							0.03181	0.1216	0.03181	0.1217
	0.03208	0.2688	0.03208	0.2688							0.03208	0.1218	0.03208	0.1219
	0.03236	0.2699	0.03236	0.2699							0.03236	0.122	0.03236	0.1221
	0.03264	0.271	0.03264	0.271							0.03264	0.1222	0.03264	0.1223
	0.03292	0.2721	0.03292	0.2721							0.03292	0.1224	0.03292	0.1225
	0.03319	0.2732	0.03319	0.2732							0.03319	0.1226	0.03319	0.1227
	0.03347	0.2743	0.03347	0.2743							0.03347	0.1229	0.03347	0.1229
	0.03375	0.2754	0.03375	0.2754							0.03375	0.1231	0.03375	0.1231
	0.03403	0.2765	0.03403	0.2765							0.03403	0.1233	0.03403	0.1233
	0.03431	0.2776	0.03431	0.2776							0.03431	0.1235	0.03431	0.1235
	0.03458	0.2787	0.03458	0.2787							0.03458	0.1237	0.03458	0.1237
	0.03486	0.2798	0.03486	0.2798							0.03486	0.1239	0.03486	0.1239
	0.03514	0.281	0.03514	0.281							0.03514	0.1241	0.03514	0.1241
	0.03542	0.2821	0.03542	0.2821							0.03542	0.1243	0.03542	0.1243
	0.03569	0.2832	0.03569	0.2832							0.03569	0.1245	0.03569	0.1245
	0.03597	0.2843	0.03597	0.2843							0.03597	0.1247	0.03597	0.1247
	0.03625	0.2855	0.03625	0.2855							0.03625	0.1249	0.03625	0.1249
	0.03653	0.2866	0.03653	0.2866							0.03653	0.1251	0.03653	0.1251
	0.03681	0.2877	0.03681	0.2877							0.03681	0.1253	0.03681	0.1253
	0.03708	0.2889	0.03708	0.2889							0.03708	0.1255	0.03708	0.1255
	0.03736	0.29	0.03736	0.29							0.03736	0.1257	0.03736	0.1257
	0.03764	0.2912	0.03764	0.2912							0.03764	0.1259	0.03764	0.1259
	0.03792	0.2923	0.03792	0.2923							0.03792	0.1261	0.03792	0.1261
	0.03819	0.2935	0.03819	0.2935							0.03819	0.1263	0.03819	0.1263
	0.03847	0.2947	0.03847	0.2947							0.03847	0.1265	0.03847	0.1265
	0.03875	0.2958	0.03875	0.2958							0.03875	0.1267	0.03875	0.1267
	0.03903	0.297	0.03903	0.297							0.03903	0.1269	0.03903	0.1269
	0.03931	0.2982	0.03931	0.2982							0.03931	0.1271	0.03931	0.1271
	0.03958	0.2993	0.03958	0.2993							0.03958	0.1273	0.03958	0.1273
	0.03986	0.3005	0.03986	0.3005							0.03986	0.1275	0.03986	0.1275
	0.04014	0.3017	0.04014	0.3017							0.04014	0.1277	0.04014	0.1278
	0.04042	0.3029	0.04042	0.3029							0.04042	0.128	0.04042	0.128
	0.04069	0.3041	0.04069	0.3041							0.04069	0.1282	0.04069	0.1282
	0.04097	0.3053	0.04097	0.3053							0.04097	0.1284	0.04097	0.1284
	0.04125	0.3064	0.04125	0.3065							0.04125	0.1286	0.04125	0.1286
	0.04153	0.3076	0.04153	0.3077							0.04153	0.1288	0.04153	0.1288
	0.04181	0.3089	0.04181	0.3089							0.04181	0.129	0.04181	0.129
	0.04208	0.3101	0.04208	0.3101							0.04208	0.1292	0.04208	0.1292
	0.04236	0.3113	0.04236	0.3113							0.04236	0.1294	0.04236	0.1294
	0.04264	0.3125	0.04264	0.3125							0.04264	0.1296	0.04264	0.1296
	0.04292	0.3137	0.04292	0.3137							0.04292	0.1298	0.04292	0.1298
	0.04319	0.3149	0.04319	0.3149							0.04319	0.13	0.04319	0.13
	0.04347	0.3161	0.04347	0.3162							0.04347	0.1303	0.04347	0.1303
	0.04375	0.3174	0.04375	0.3174							0.04375	0.1305	0.04375	0.1305
	0.04403	0.3186	0.04403	0.3186							0.04403	0.1307	0.04403	0.1307
	0.04431	0.3198	0.04431	0.3198							0.04431	0.1309	0.04431	0.1309
	0.04458	0.3211	0.04458	0.3211							0.04458	0.1311	0.04458	0.1311
	0.04486	0.3223	0.04486	0.3223							0.04486	0.1313	0.04486	0.1313
	0.04514	0.3236	0.04514	0.3236							0.04514	0.1315	0.04514	0.1315
	0.04542	0.3248	0.04542	0.3248							0.04542	0.1317	0.04542	0.1317
	0.04569	0.3261	0.04569	0.3261							0.04569	0.1319	0.04569	0.1319
	0.04597	0.3273	0.04597	0.3273							0.04597	0.1322	0.04597	0.1322
	0.04625	0.3286	0.04625	0.3286							0.04625	0.1324	0.04625	0.1324
	0.04653	0.3299	0.04653	0.3299							0.04653	0.1326	0.04653	0.1326
	0.04681	0.3311	0.04681	0.3311							0.04681	0.1328	0.04681	0.1328
	0.04708	0.3324	0.04708	0.3324							0.04708	0.133	0.04708	0.133
	0.04736	0.3337	0.04736	0.3337							0.04736	0.1332	0.04736	0.1332
	0.04764	0.335	0.04764	0.335							0.04764	0.1334	0.04764	0.1334
	0.04792	0.3363	0.04792	0.3363							0.04792	0.1336	0.04792	0.1337
	0.04819	0.3375	0.04819	0.3375							0.04819	0.1339	0.04819	0.1339
	0.04847	0.3388	0.04847	0.3388							0.04847	0.1341	0.04847	0.1341
	0.04875	0.3401	0.04875	0.3401							0.04875	0.1343	0.04875	0.1343
	0.04903	0.3414	0.04903	0.3414							0.04903	0.1345	0.04903	0.1345
	0.04931	0.3427	0.04931	0.3427							0.04931	0.1347	0.04931	0.1347
	0.04958	0.344	0.04958	0.3441							0.04958	0.1349	0.04958	0.1349
	0.04986	0.3454	0.04986	0.3454							0.04986	0.1352	0.04986	0.1352
	0.05014	0.3467	0.05014	0.3467							0.05014	0.1354	0.05014	0.1354
	0.05042	0.348	0.05042	0.348							0.05042	0.1356	0.05042	0.1356
	0.05069	0.3493	0.05069	0.3493							0.05069	0.1358	0.05069	0.1358
	0.05097	0.3506	0.05097	0.3507							0.05097	0.136	0.05097	0.136
	0.05125	0.352	0.05125	0.352							0.05125	0.1362	0.05125	0.1362
	0.05153	0.3533	0.05153	0.3533							0.05153	0.1365	0.05153	0.1365
	0.05181	0.3547	0.05181	0.3547							0.05181	0.1367	0.05181	0.1367
	0.05208	0.356	0.05208	0.356							0.05208	0.1369	0.05208	0.1369
	0.05236	0.3573	0.05236	0.3574							0.05236	0.1371	0.05236	0.1371
	0.05264	0.3587	0.05264	0.3587							0.05264	0.1373	0.05264	0.1373
	0.05292	0.3601	0.05292	0.3601							0.05292	0.1376	0.05292	0.1376
	0.05319	0.3614	0.05319	0.3614							0.05319	0.1378	0.05319	0.1378
	0.05347	0.3628	0.05347	0.3628							0.05347	0.138	0.05347	0.138
	0.05375	0.3642	0.05375	0.3642							0.05375	0.1382	0.05375	0.1382
	0.05403	0.3655	0.05403	0.3655							0.05403	0.1384	0.05403	0.1384
	0.05431	0.3669	0.05431	0.3669							0.05431	0.1387	0.05431	0.1387
	0.05458	0.3683	0.05458	0.3683							0.05458	0.1389	0.05458	0.1389
	0.05486	0.3697	0.05486	0.3697							0.05486	0.1391	0.05486	0.1391
	0.05514	0.3711	0.05514	0.3711							0.05514	0.1393	0.05514	0.1393
	0.05542	0.3725	0.05542	0.3725							0.05542	0.1395	0.05542	0.1395
	0.05569	0.3738	0.05569	0.3739							0.05569	0.1398	0.05569	0.1398
	0.05597	0.3753	0.05597	0.3753							0.05597	0.14	0.05597	0.14
	0.05625	0.3767	0.05625	0.3767							0.05625	0.1402	0.05625	0.1402
	0.05653	0.3781	0.05653	0.3781							0.05653	0.1404	0.05653	0.1404
	0.05681	0.3795	0.05681	0.3795							0.05681	0.1407	0.05681	0.1407
	0.05708	0.3809	0.05708	0.3809							0.05708	0.1409	0.05708	0.1409
	0.05736	0.3823	0.05736	0.3823							0.05736	0.1411	0.05736	0.1411
	0.05764	0.3838	0.05764	0.3838							0.05764	0.1413	0.05764	0.1413
	0.05792	0.3852	0.05792	0.3852							0.05792	0.1416	0.05792	0.1416
	0.05819	0.3866	0.05819	0.3866							0.05819	0.1418	0.05819	0.1418
	0.05847	0.3881	0.05847	0.3881							0.05847	0.142	0.05847	0.142
	0.05875	0.3895	0.05875	0.3895							0.05875	0.1422	0.05875	0.1422
	0.05903	0.391	0.05903	0.391							0.05903	0.1425	0.05903	0.1425
	0.05931	0.3924	0.05931	0.3924							0.05931	0.1427	0.05931	0.1427
	0.05958	0.3939	0.05958	0.3939							0.05958	0.1429	0.05958	0.1429
	0.05986	0.3953	0.05986	0.3953							0.05986	0.1431	0.05986	0.1431
	0.06014	0.3968	0.06014	0.3968							0.06014	0.1434	0.06014	0.1434
	0.06042	0.3983	0.06042	0.3983							0.06042	0.1436	0.06042	0.1436
	0.06069	0.3997	0.06069	0.3997							0.06069	0.1438	0.06069	0.1438
	0.06097	0.4012	0.06097	0.4012							0.06097	0.1441	0.06097	0.1441
	0.06125	0.4027	0.06125	0.4027							0.06125	0.1443	0.06125	0.1443
	0.06153	0.4042	0.06153	0.4042							0.06153	0.1445	0.06153	0.1445
	0.06181	0.4057	0.06181	0.4057							0.06181	0.1447	0.06181	0.1447
	0.06208	0.4072	0.06208	0.4072							0.06208	0.145	0.06208	0.145
	0.06236	0.4087	0.06236	0.4087							0.06236	0.1452	0.06236	0.1452
	0.06264	0.4102	0.06264	0.4102							0.06264	0.1454	0.06264	0.1454
	0.06292	0.4117	0.06292	0.4117							0.06292	0.1457	0.06292	0.1457
	0.06319	0.4132	0.06319	0.4132							0.06319	0.1459	0.06319	0.1459
	0.06347	0.4147	0.06347	0.4148							0.06347	0.1461	0.06347	0.1461
	0.06375	0.4163	0.06375	0.4163							0.06375	0.1464	0.06375	0.1464
	0.06403	0.4178	0.06403	0.4178							0.06403	0.1466	0.06403	0.1466
	0.06431	0.4193	0.06431	0.4193							0.06431	0.1468	0.06431	0.1468
	0.06458	0.4209	0.06458	0.4209							0.06458	0.1471	0.06458	0.1471
	0.06486	0.4224	0.06486	0.4224							0.06486	0.1473	0.06486	0.1473
	0.06514	0.424	0.06514	0.424							0.06514	0.1475	0.06514	0.1475
	0.06542	0.4255	0.06542	0.4255							0.06542	0.1478	0.06542	0.1478
	0.06569	0.4271	0.06569	0.4271							0.06569	0.148	0.06569	0.148
	0.06597	0.4286	0.06597	0.4286							0.06597	0.1482	0.06597	0.1482
	0.06625	0.4302	0.06625	0.4302							0.06625	0.1485	0.06625	0.1485
	0.06653	0.4318	0.06653	0.4318							0.06653	0.1487	0.06653	0.1487
	0.06681	0.4334	0.06681	0.4334							0.06681	0.1489	0.06681	0.1489
	0.06708	0.4349	0.06708	0.4349							0.06708	0.1492	0.06708	0.1492
	0.06736	0.4365	0.06736	0.4365							0.06736	0.1494	0.06736	0.1494
	0.06764	0.4381	0.06764	0.4381							0.06764	0.1496	0.06764	0.1496
	0.06792	0.4397	0.06792	0.4397							0.06792	0.1499	0.06792	0.1499
	0.06819	0.4413	0.06819	0.4413							0.06819	0.1501	0.06819	0.1501
	0.06847	0.4429	0.06847	0.4429							0.06847	0.1504	0.06847	0.1504
	0.06875	0.4445	0.06875	0.4445							0.06875	0.1506	0.06875	0.1506
	0.06903	0.4461	0.06903	0.4461							0.06903	0.1508	0.06903	0.1508
	0.06931	0.4478	0.06931	0.4478							0.06931	0.1511	0.06931	0.1511
	0.06958	0.4494	0.06958	0.4494							0.06958	0.1513	0.06958	0.1513
	0.06986	0.451	0.06986	0.451							0.06986	0.1515	0.06986	0.1516
	0.07014	0.4526	0.07014	0.4527							0.07014	0.1518	0.07014	0.1518
	0.07042	0.4543	0.07042	0.4543							0.07042	0.152	0.07042	0.152
	0.07069	0.4559	0.07069	0.4559							0.07069	0.1523	0.07069	0.1523
	0.07097	0.4576	0.07097	0.4576							0.07097	0.1525	0.07097	0.1525
	0.07125	0.4592	0.07125	0.4592							0.07125	0.1528	0.07125	0.1528
	0.07153	0.4609	0.07153	0.4609							0.07153	0.153	0.07153	0.153
	0.07181	0.4626	0.07181	0.4626							0.07181	0.1532	0.07181	0.1532
	0.07208	0.4642	0.07208	0.4642							0.07208	0.1535	0.07208	0.1535
	0.07236	0.4659	0.07236	0.4659							0.07236	0.1537	0.07236	0.1537
	0.07264	0.4676	0.07264	0.4676							0.07264	0.154	0.07264	0.154
	0.07292	0.4693	0.07292	0.4693							0.07292	0.1542	0.07292	0.1542
	0.07319	0.4709	0.07319	0.471							0.07319	0.1545	0.07319	0.1545
	0.07347	0.4726	0.07347	0.4726							0.07347	0.1547	0.07347	0.1547
	0.07375	0.4743	0.07375	0.4743							0.07375	0.1549	0.07375	0.155
	0.07403	0.476	0.07403	0.4761							0.07403	0.1552	0.07403	0.1552
	0.07431	0.4778	0.07431	0.4778							0.07431	0.1554	0.07431	0.1554
	0.07458	0.4795	0.07458	0.4795							0.07458	0.1557	0.07458	0.1557
	0.07486	0.4812	0.07486	0.4812							0.07486	0.1559	0.07486	0.1559
	0.07514	0.4829	0.07514	0.4829							0.07514	0.1562	0.07514	0.1562
	0.07542	0.4846	0.07542	0.4846							0.07542	0.1564	0.07542	0.1564
	0.07569	0.4864	0.07569	0.4864							0.07569	0.1567	0.07569	0.1567
	0.07597	0.4881	0.07597	0.4881							0.07597	0.1569	0.07597	0.1569
	0.07625	0.4899	0.07625	0.4899							0.07625	0.1572	0.07625	0.1572
	0.07653	0.4916	0.07653	0.4916							0.07653	0.1574	0.07653	0.1574
	0.07681	0.4934	0.07681	0.4934							0.07681	0.1577	0.07681	0.1577
	0.07708	0.4951	0.07708	0.4951							0.07708	0.1579	0.07708	0.1579
	0.07736	0.4969	0.07736	0.4969							0.07736	0.1582	0.07736	0.1582
	0.07764	0.4987	0.07764	0.4987							0.07764	0.1584	0.07764	0.1584
	0.07792	0.5004	0.07792	0.5005							0.07792	0.1587	0.07792	0.1587
	0.07819	0.5022	0.07819	0.5022							0.07819	0.1589	0.07819	0.1589
	0.07847	0.504	0.07847	0.504							0.07847	0.1592	0.07847	0.1592
	0.07875	0.5058	0.07875	0.5058							0.07875	0.1594	0.07875	0.1594
	0.07903	0.5076	0.07903	0.5076							0.07903	0.1597	0.07903	0.1597
	0.07931	0.5094	0.07931	0.5094							0.07931	0.1599	0.07931	0.1599
	0.07958	0.5112	0.07958	0.5112							0.07958	0.1602	0.07958	0.1602
	0.07986	0.513	0.07986	0.513							0.07986	0.1604	0.07986	0.1604
	0.08014	0.5149	0.08014	0.5149							0.08014	0.1607	0.08014	0.1607
	0.08042	0.5167	0.08042	0.5167							0.08042	0.1609	0.08042	0.161
	0.08069	0.5185	0.08069	0.5185							0.08069	0.1612	0.08069	0.1612
	0.08097	0.5203	0.08097	0.5204							0.08097	0.1615	0.08097	0.1615
	0.08125	0.5222	0.08125	0.5222							0.08125	0.1617	0.08125	0.1617
	0.08153	0.524	0.08153	0.524							0.08153	0.162	0.08153	0.162
	0.08181	0.5259	0.08181	0.5259							0.08181	0.1622	0.08181	0.1622
	0.08208	0.5277	0.08208	0.5277							0.08208	0.1625	0.08208	0.1625
	0.08236	0.5296	0.08236	0.5296							0.08236	0.1627	0.08236	0.1628
	0.08264	0.5315	0.08264	0.5315							0.08264	0.163	0.08264	0.163
	0.08292	0.5334	0.08292	0.5334							0.08292	0.1633	0.08292	0.1633
	0.08319	0.5352	0.08319	0.5352							0.08319	0.1635	0.08319	0.1635
	0.08347	0.5371	0.08347	0.5371							0.08347	0.1638	0.08347	0.1638
	0.08375	0.539	0.08375	0.539							0.08375	0.164	0.08375	0.164
	0.08403	0.5409	0.08403	0.5409							0.08403	0.1643	0.08403	0.1643
	0.08431	0.5428	0.08431	0.5428							0.08431	0.1646	0.08431	0.1646
	0.08458	0.5447	0.08458	0.5447							0.08458	0.1648	0.08458	0.1648
	0.08486	0.5466	0.08486	0.5466							0.08486	0.1651	0.08486	0.1651
	0.08514	0.5485	0.08514	0.5486							0.08514	0.1654	0.08514	0.1654
	0.08542	0.5505	0.08542	0.5505							0.08542	0.1656	0.08542	0.1656
	0.08569	0.5524	0.08569	0.5524							0.08569	0.1659	0.08569	0.1659
	0.08597	0.5543	0.08597	0.5543							0.08597	0.1661	0.08597	0.1661
	0.08625	0.5563	0.08625	0.5563							0.08625	0.1664	0.08625	0.1664
	0.08653	0.5582	0.08653	0.5582							0.08653	0.1667	0.08653	0.1667
	0.08681	0.5602	0.08681	0.5602							0.08681	0.1669	0.08681	0.1669
	0.08708	0.5621	0.08708	0.5622							0.08708	0.1672	0.08708	0.1672
	0.08736	0.5641	0.08736	0.5641							0.08736	0.1675	0.08736	0.1675
	0.08764	0.5661	0.08764	0.5661							0.08764	0.1677	0.08764	0.1677
	0.08792	0.5681	0.08792	0.5681							0.08792	0.168	0.08792	0.168
	0.08819	0.57	0.08819	0.57							0.08819	0.1683	0.08819	0.1683
	0.08847	0.572	0.08847	0.572							0.08847	0.1685	0.08847	0.1685
	0.08875	0.574	0.08875	0.574							0.08875	0.1688	0.08875	0.1688
	0.08903	0.576	0.08903	0.576							0.08903	0.1691	0.08903	0.1691
	0.08931	0.578	0.08931	0.578							0.08931	0.1693	0.08931	0.1693
	0.08958	0.58	0.08958	0.5801							0.08958	0.1696	0.08958	0.1696
	0.08986	0.5821	0.08986	0.5821							0.08986	0.1699	0.08986	0.1699
	0.09014	0.5841	0.09014	0.5841							0.09014	0.1702	0.09014	0.1702
	0.09042	0.5861	0.09042	0.5861							0.09042	0.1704	0.09042	0.1704
	0.09069	0.5882	0.09069	0.5882							0.09069	0.1707	0.09069	0.1707
	0.09097	0.5902	0.09097	0.5902							0.09097	0.171	0.09097	0.171
	0.09125	0.5922	0.09125	0.5923							0.09125	0.1712	0.09125	0.1712
	0.09153	0.5943	0.09153	0.5943							0.09153	0.1715	0.09153	0.1715
	0.09181	0.5964	0.09181	0.5964							0.09181	0.1718	0.09181	0.1718
	0.09208	0.5984	0.09208	0.5984							0.09208	0.1721	0.09208	0.1721
	0.09236	0.6005	0.09236	0.6005							0.09236	0.1723	0.09236	0.1723
	0.09264	0.6026	0.09264	0.6026							0.09264	0.1726	0.09264	0.1726
	0.09292	0.6047	0.09292	0.6047							0.09292	0.1729	0.09292	0.1729
	0.09319	0.6067	0.09319	0.6068							0.09319	0.1732	0.09319	0.1732
	0.09347	0.6088	0.09347	0.6089							0.09347	0.1734	0.09347	0.1734
	0.09375	0.6109	0.09375	0.611							0.09375	0.1737	0.09375	0.1737
	0.09403	0.6131	0.09403	0.6131							0.09403	0.174	0.09403	0.174
	0.09431	0.6152	0.09431	0.6152							0.09431	0.1743	0.09431	0.1743
	0.09458	0.6173	0.09458	0.6173							0.09458	0.1745	0.09458	0.1746
	0.09486	0.6194	0.09486	0.6194							0.09486	0.1748	0.09486	0.1748
	0.09514	0.6216	0.09514	0.6216							0.09514	0.1751	0.09514	0.1751
	0.09542	0.6237	0.09542	0.6237							0.09542	0.1754	0.09542	0.1754
	0.09569	0.6258	0.09569	0.6258							0.09569	0.1757	0.09569	0.1757
	0.09597	0.628	0.09597	0.628							0.09597	0.1759	0.09597	0.176
	0.09625	0.6301	0.09625	0.6302							0.09625	0.1762	0.09625	0.1762
	0.09653	0.6323	0.09653	0.6323							0.09653	0.1765	0.09653	0.1765
	0.09681	0.6345	0.09681	0.6345							0.09681	0.1768	0.09681	0.1768
	0.09708	0.6367	0.09708	0.6367							0.09708	0.1771	0.09708	0.1771
	0.09736	0.6388	0.09736	0.6389							0.09736	0.1774	0.09736	0.1774
	0.09764	0.641	0.09764	0.641							0.09764	0.1776	0.09764	0.1777
	0.09792	0.6432	0.09792	0.6432							0.09792	0.1779	0.09792	0.1779
	0.09819	0.6454	0.09819	0.6454							0.09819	0.1782	0.09819	0.1782
	0.09847	0.6476	0.09847	0.6476							0.09847	0.1785	0.09847	0.1785
	0.09875	0.6499	0.09875	0.6499							0.09875	0.1788	0.09875	0.1788
	0.09903	0.6521	0.09903	0.6521							0.09903	0.1791	0.09903	0.1791
	0.09931	0.6543	0.09931	0.6543							0.09931	0.1794	0.09931	0.1794
	0.09958	0.6565	0.09958	0.6565							0.09958	0.1797	0.09958	0.1797
	0.09986	0.6588	0.09986	0.6588							0.09986	0.1799	0.09986	0.1799
	0.10014	0.661	0.10014	0.661							0.10014	0.1802	0.10014	0.1802
	0.10042	0.6633	0.10042	0.6633							0.10042	0.1805	0.10042	0.1805
	0.10069	0.6655	0.10069	0.6655							0.10069	0.1808	0.10069	0.1808
	0.10097	0.6678	0.10097	0.6678							0.10097	0.1811	0.10097	0.1811
	0.10125	0.6701	0.10125	0.6701							0.10125	0.1814	0.10125	0.1814
	0.10153	0.6724	0.10153	0.6724							0.10153	0.1817	0.10153	0.1817
	0.10181	0.6746	0.10181	0.6747							0.10181	0.182	0.10181	0.182
	0.10208	0.6769	0.10208	0.6769							0.10208	0.1823	0.10208	0.1823
	0.10236	0.6792	0.10236	0.6792							0.10236	0.1826	0.10236	0.1826
	0.10264	0.6815	0.10264	0.6815							0.10264	0.1829	0.10264	0.1829
	0.10292	0.6838	0.10292	0.6839							0.10292	0.1831	0.10292	0.1832
	0.10319	0.6862	0.10319	0.6862							0.10319	0.1834	0.10319	0.1834
	0.10347	0.6885	0.10347	0.6885							0.10347	0.1837	0.10347	0.1837
	0.10375	0.6908	0.10375	0.6908							0.10375	0.184	0.10375	0.184
	0.10403	0.6932	0.10403	0.6932							0.10403	0.1843	0.10403	0.1843
	0.10431	0.6955	0.10431	0.6955							0.10431	0.1846	0.10431	0.1846
	0.10458	0.6979	0.10458	0.6979							0.10458	0.1849	0.10458	0.1849
	0.10486	0.7002	0.10486	0.7002							0.10486	0.1852	0.10486	0.1852
	0.10514	0.7026	0.10514	0.7026							0.10514	0.1855	0.10514	0.1855
	0.10542	0.7049	0.10542	0.7049							0.10542	0.1858	0.10542	0.1858
	0.10569	0.7073	0.10569	0.7073							0.10569	0.1861	0.10569	0.1861
	0.10597	0.7097	0.10597	0.7097							0.10597	0.1864	0.10597	0.1864
	0.10625	0.7121	0.10625	0.7121							0.10625	0.1867	0.10625	0.1867
	0.10653	0.7145	0.10653	0.7145							0.10653	0.187	0.10653	0.187
	0.10681	0.7169	0.10681	0.7169							0.10681	0.1873	0.10681	0.1873
	0.10708	0.7193	0.10708	0.7193							0.10708	0.1876	0.10708	0.1876
	0.10736	0.7217	0.10736	0.7217							0.10736	0.1879	0.10736	0.1879
	0.10764	0.7241	0.10764	0.7241							0.10764	0.1882	0.10764	0.1882
	0.10792	0.7266	0.10792	0.7266							0.10792	0.1885	0.10792	0.1885
	0.10819	0.729	0.10819	0.729							0.10819	0.1888	0.10819	0.1888
	0.10847	0.7314	0.10847	0.7314							0.10847	0.1891	0.10847	0.1892
	0.10875	0.7339	0.10875	0.7339							0.10875	0.1895	0.10875	0.1895
	0.10903	0.7363	0.10903	0.7363							0.10903	0.1898	0.10903	0.1898
	0.10931	0.7388	0.10931	0.7388							0.10931	0.1901	0.10931	0.1901
	0.10958	0.7413	0.10958	0.7413							0.10958	0.1904	0.10958	0.1904
	0.10986	0.7437	0.10986	0.7437							0.10986	0.1907	0.10986	0.1907
	0.11014	0.7462	0.11014	0.7462							0.11014	0.191	0.11014	0.191
	0.11042	0.7487	0.11042	0.7487							0.11042	0.1913	0.11042	0.1913
	0.11069	0.7512	0.11069	0.7512							0.11069	0.1916	0.11069	0.1916
	0.11097	0.7537	0.11097	0.7537							0.11097	0.1919	0.11097	0.1919
	0.11125	0.7562	0.11125	0.7562							0.11125	0.1922	0.11125	0.1922
	0.11153	0.7587	0.11153	0.7587							0.11153	0.1925	0.11153	0.1925
	0.11181	0.7612	0.11181	0.7612							0.11181	0.1929	0.11181	0.1929
	0.11208	0.7638	0.11208	0.7638							0.11208	0.1932	0.11208	0.1932
	0.11236	0.7663	0.11236	0.7663							0.11236	0.1935	0.11236	0.1935
	0.11264	0.7688	0.11264	0.7688							0.11264	0.1938	0.11264	0.1938
	0.11292	0.7714	0.11292	0.7714							0.11292	0.1941	0.11292	0.1941
	0.11319	0.7739	0.11319	0.7739							0.11319	0.1944	0.11319	0.1944
	0.11347	0.7765	0.11347	0.7765							0.11347	0.1947	0.11347	0.1947
	0.11375	0.7791	0.11375	0.7791							0.11375	0.1951	0.11375	0.1951
	0.11403	0.7816	0.11403	0.7816							0.11403	0.1954	0.11403	0.1954
	0.11431	0.7842	0.11431	0.7842							0.11431	0.1957	0.11431	0.1957
	0.11458	0.7868	0.11458	0.7868							0.11458	0.196	0.11458	0.196
	0.11486	0.7894	0.11486	0.7894							0.11486	0.1963	0.11486	0.1963
	0.11514	0.792	0.11514	0.792							0.11514	0.1966	0.11514	0.1966
	0.11542	0.7946	0.11542	0.7946							0.11542	0.197	0.11542	0.197
	0.11569	0.7972	0.11569	0.7972							0.11569	0.1973	0.11569	0.1973
	0.11597	0.7998	0.11597	0.7998							0.11597	0.1976	0.11597	0.1976
	0.11625	0.8024	0.11625	0.8025							0.11625	0.1979	0.11625	0.1979
	0.11653	0.8051	0.11653	0.8051							0.11653	0.1982	0.11653	0.1982
	0.11681	0.8077	0.11681	0.8077							0.11681	0.1986	0.11681	0.1986
	0.11708	0.8104	0.11708	0.8104							0.11708	0.1989	0.11708	0.1989
	0.11736	0.813	0.11736	0.813							0.11736	0.1992	0.11736	0.1992
	0.11764	0.8157	0.11764	0.8157							0.11764	0.1995	0.11764	0.1995
	0.11792	0.8183	0.11792	0.8183							0.11792	0.1999	0.11792	0.1999
	0.11819	0.821	0.11819	0.821							0.11819	0.2002	0.11819	0.2002
	0.11847	0.8237	0.11847	0.8237							0.11847	0.2005	0.11847	0.2005
	0.11875	0.8264	0.11875	0.8264							0.11875	0.2008	0.11875	0.2008
	0.11903	0.8291	0.11903	0.8291							0.11903	0.2012	0.11903	0.2012
	0.11931	0.8318	0.11931	0.8318							0.11931	0.2015	0.11931	0.2015
	0.11958	0.8345	0.11958	0.8345							0.11958	0.2018	0.11958	0.2018
	0.11986	0.8372	0.11986	0.8372							0.11986	0.2021	0.11986	0.2022
	0.12014	0.8399	0.12014	0.8399							0.12014	0.2025	0.12014	0.2025
	0.12042	0.8426	0.12042	0.8426							0.12042	0.2028	0.12042	0.2028
	0.12069	0.8453	0.12069	0.8453							0.12069	0.2031	0.12069	0.2031
	0.12097	0.8481	0.12097	0.8481							0.12097	0.2035	0.12097	0.2035
	0.12125	0.8508	0.12125	0.8508							0.12125	0.2038	0.12125	0.2038
	0.12153	0.8536	0.12153	0.8536							0.12153	0.2041	0.12153	0.2041
	0.12181	0.8563	0.12181	0.8563							0.12181	0.2045	0.12181	0.2045
	0.12208	0.8591	0.12208	0.8591							0.12208	0.2048	0.12208	0.2048
	0.12236	0.8619	0.12236	0.8619							0.12236	0.2051	0.12236	0.2051
	0.12264	0.8646	0.12264	0.8646							0.12264	0.2055	0.12264	0.2055
	0.12292	0.8674	0.12292	0.8674							0.12292	0.2058	0.12292	0.2058
	0.12319	0.8702	0.12319	0.8702							0.12319	0.2061	0.12319	0.2061
	0.12347	0.873	0.12347	0.873							0.12347	0.2065	0.12347	0.2065
	0.12375	0.8758	0.12375	0.8758							0.12375	0.2068	0.12375	0.2068
	0.12403	0.8786	0.12403	0.8786							0.12403	0.2071	0.12403	0.2071
	0.12431	0.8814	0.12431	0.8814							0.12431	0.2075	0.12431	0.2075
	0.12458	0.8842	0.12458	0.8842							0.12458	0.2078	0.12458	0.2078
	0.12486	0.8871	0.12486	0.8871							0.12486	0.2082	0.12486	0.2082
	0.12514	0.8899	0.12514	0.8899							0.12514	0.2085	0.12514	0.2085
	0.12542	0.8927	0.12542	0.8927							0.12542	0.2088	0.12542	0.2088
	0.12569	0.8956	0.12569	0.8956							0.12569	0.2092	0.12569	0.2092
	0.12597	0.8984	0.12597	0.8984							0.12597	0.2095	0.12597	0.2095
	0.12625	0.9013	0.12625	0.9013							0.12625	0.2099	0.12625	0.2099
	0.12653	0.9042	0.12653	0.9042							0.12653	0.2102	0.12653	0.2102
	0.12681	0.907	0.12681	0.907							0.12681	0.2105	0.12681	0.2106
	0.12708	0.9099	0.12708	0.9099							0.12708	0.2109	0.12708	0.2109
	0.12736	0.9128	0.12736	0.9128							0.12736	0.2112	0.12736	0.2112
	0.12764	0.9157	0.12764	0.9157							0.12764	0.2116	0.12764	0.2116
	0.12792	0.9186	0.12792	0.9186							0.12792	0.2119	0.12792	0.2119
	0.12819	0.9215	0.12819	0.9215							0.12819	0.2123	0.12819	0.2123
	0.12847	0.9244	0.12847	0.9244							0.12847	0.2126	0.12847	0.2126
	0.12875	0.9273	0.12875	0.9273							0.12875	0.213	0.12875	0.213
	0.12903	0.9303	0.12903	0.9303							0.12903	0.2133	0.12903	0.2133
	0.12931	0.9332	0.12931	0.9332							0.12931	0.2137	0.12931	0.2137
	0.12958	0.9361	0.12958	0.9361							0.12958	0.214	0.12958	0.214
	0.12986	0.9391	0.12986	0.9391							0.12986	0.2144	0.12986	0.2144
	0.13014	0.942	0.13014	0.942							0.13014	0.2147	0.13014	0.2147
	0.13042	0.945	0.13042	0.945							0.13042	0.2151	0.13042	0.2151
	0.13069	0.9479	0.13069	0.9479							0.13069	0.2154	0.13069	0.2154
	0.13097	0.9509	0.13097	0.9509							0.13097	0.2158	0.13097	0.2158
	0.13125	0.9539	0.13125	0.9539							0.13125	0.2161	0.13125	0.2161
	0.13153	0.9569	0.13153	0.9569							0.13153	0.2165	0.13153	0.2165
	0.13181	0.9598	0.13181	0.9599							0.13181	0.2168	0.13181	0.2168
	0.13208	0.9628	0.13208	0.9628							0.13208	0.2172	0.13208	0.2172
	0.13236	0.9658	0.13236	0.9658							0.13236	0.2175	0.13236	0.2175
	0.13264	0.9688	0.13264	0.9689							0.13264	0.2179	0.13264	0.2179
	0.13292	0.9719	0.13292	0.9719							0.13292	0.2183	0.13292	0.2183
	0.13319	0.9749	0.13319	0.9749							0.13319	0.2186	0.13319	0.2186
	0.13347	0.9779	0.13347	0.9779							0.13347	0.219	0.13347	0.219
	0.13375	0.9809	0.13375	0.9809							0.13375	0.2193	0.13375	0.2193
	0.13403	0.984	0.13403	0.984							0.13403	0.2197	0.13403	0.2197
	0.13431	0.987	0.13431	0.987							0.13431	0.22	0.13431	0.22
	0.13458	0.9901	0.13458	0.9901							0.13458	0.2204	0.13458	0.2204
	0.13486	0.9931	0.13486	0.9931							0.13486	0.2208	0.13486	0.2208
	0.13514	0.9962	0.13514	0.9962							0.13514	0.2211	0.13514	0.2211
	0.13542	0.9993	0.13542	0.9993							0.13542	0.2215	0.13542	0.2215
	0.13569	1.0023	0.13569	1.0023							0.13569	0.2219	0.13569	0.2219
	0.13597	1.0054	0.13597	1.0054							0.13597	0.2222	0.13597	0.2222
	0.13625	1.0085	0.13625	1.0085							0.13625	0.2226	0.13625	0.2226
	0.13653	1.0116	0.13653	1.0116							0.13653	0.2229	0.13653	0.2229
	0.13681	1.0147	0.13681	1.0147							0.13681	0.2233	0.13681	0.2233
	0.13708	1.0178	0.13708	1.0178							0.13708	0.2237	0.13708	0.2237
	0.13736	1.0209	0.13736	1.0209							0.13736	0.224	0.13736	0.224
	0.13764	1.024	0.13764	1.024							0.13764	0.2244	0.13764	0.2244
	0.13792	1.0271	0.13792	1.0272							0.13792	0.2248	0.13792	0.2248
	0.13819	1.0303	0.13819	1.0303							0.13819	0.2251	0.13819	0.2251
	0.13847	1.0334	0.13847	1.0334							0.13847	0.2255	0.13847	0.2255
	0.13875	1.0365	0.13875	1.0366							0.13875	0.2259	0.13875	0.2259
	0.13903	1.0397	0.13903	1.0397							0.13903	0.2263	0.13903	0.2263
	0.13931	1.0428	0.13931	1.0429							0.13931	0.2266	0.13931	0.2266
	0.13958	1.046	0.13958	1.046							0.13958	0.227	0.13958	0.227
	0.13986	1.0492	0.13986	1.0492							0.13986	0.2274	0.13986	0.2274
	0.14014	1.0523	0.14014	1.0524							0.14014	0.2277	0.14014	0.2277
	0.14042	1.0555	0.14042	1.0555							0.14042	0.2281	0.14042	0.2281
	0.14069	1.0587	0.14069	1.0587							0.14069	0.2285	0.14069	0.2285
	0.14097	1.0619	0.14097	1.0619							0.14097	0.2289	0.14097	0.2289
	0.14125	1.0651	0.14125	1.0651							0.14125	0.2292	0.14125	0.2292
	0.14153	1.0683	0.14153	1.0683							0.14153	0.2296	0.14153	0.2296
	0.14181	1.0715	0.14181	1.0715							0.14181	0.23	0.14181	0.23
	0.14208	1.0747	0.14208	1.0747							0.14208	0.2304	0.14208	0.2304
	0.14236	1.0779	0.14236	1.0779							0.14236	0.2307	0.14236	0.2308
	0.14264	1.0812	0.14264	1.0812							0.14264	0.2311	0.14264	0.2311
	0.14292	1.0844	0.14292	1.0844							0.14292	0.2315	0.14292	0.2315
	0.14319	1.0876	0.14319	1.0876							0.14319	0.2319	0.14319	0.2319
	0.14347	1.0909	0.14347	1.0909							0.14347	0.2323	0.14347	0.2323
	0.14375	1.0941	0.14375	1.0941							0.14375	0.2326	0.14375	0.2327
	0.14403	1.0974	0.14403	1.0974							0.14403	0.233	0.14403	0.233
	0.14431	1.1006	0.14431	1.1006							0.14431	0.2334	0.14431	0.2334
	0.14458	1.1039	0.14458	1.1039							0.14458	0.2338	0.14458	0.2338
	0.14486	1.1072	0.14486	1.1072							0.14486	0.2342	0.14486	0.2342
	0.14514	1.1104	0.14514	1.1104							0.14514	0.2346	0.14514	0.2346
	0.14542	1.1137	0.14542	1.1137							0.14542	0.235	0.14542	0.235
	0.14569	1.117	0.14569	1.117							0.14569	0.2353	0.14569	0.2353
	0.14597	1.1203	0.14597	1.1203							0.14597	0.2357	0.14597	0.2357
	0.14625	1.1236	0.14625	1.1236							0.14625	0.2361	0.14625	0.2361
	0.14653	1.1269	0.14653	1.1269							0.14653	0.2365	0.14653	0.2365
	0.14681	1.1302	0.14681	1.1302							0.14681	0.2369	0.14681	0.2369
	0.14708	1.1335	0.14708	1.1335							0.14708	0.2373	0.14708	0.2373
	0.14736	1.1368	0.14736	1.1368							0.14736	0.2377	0.14736	0.2377
	0.14764	1.1402	0.14764	1.1402							0.14764	0.2381	0.14764	0.2381
	0.14792	1.1435	0.14792	1.1435							0.14792	0.2385	0.14792	0.2385
	0.14819	1.1468	0.14819	1.1468							0.14819	0.2388	0.14819	0.2389
	0.14847	1.1502	0.14847	1.1502							0.14847	0.2392	0.14847	0.2392
	0.14875	1.1535	0.14875	1.1535							0.14875	0.2396	0.14875	0.2396
	0.14903	1.1569	0.14903	1.1569							0.14903	0.24	0.14903	0.24
	0.14931	1.1602	0.14931	1.1602							0.14931	0.2404	0.14931	0.2404
	0.14958	1.1636	0.14958	1.1636							0.14958	0.2408	0.14958	0.2408
	0.14986	1.167	0.14986	1.167							0.14986	0.2412	0.14986	0.2412
	0.15014	1.1703	0.15014	1.1703							0.15014	0.2416	0.15014	0.2416
	0.15042	1.1737	0.15042	1.1737							0.15042	0.242	0.15042	0.242
	0.15069	1.1771	0.15069	1.1771							0.15069	0.2424	0.15069	0.2424
	0.15097	1.1805	0.15097	1.1805							0.15097	0.2428	0.15097	0.2428
	0.15125	1.1839	0.15125	1.1839							0.15125	0.2432	0.15125	0.2432
	0.15153	1.1873	0.15153	1.1873							0.15153	0.2436	0.15153	0.2436
	0.15181	1.1907	0.15181	1.1907							0.15181	0.244	0.15181	0.244
	0.15208	1.1941	0.15208	1.1941							0.15208	0.2444	0.15208	0.2444
	0.15236	1.1975	0.15236	1.1975							0.15236	0.2448	0.15236	0.2448
	0.15264	1.2009	0.15264	1.2009							0.15264	0.2452	0.15264	0.2452
	0.15292	1.2044	0.15292	1.2044							0.15292	0.2456	0.15292	0.2456
	0.15319	1.2078	0.15319	1.2078							0.15319	0.246	0.15319	0.246
	0.15347	1.2112	0.15347	1.2112							0.15347	0.2464	0.15347	0.2464
	0.15375	1.2147	0.15375	1.2147							0.15375	0.2468	0.15375	0.2468
	0.15403	1.2181	0.15403	1.2181							0.15403	0.2472	0.15403	0.2473
	0.15431	1.2216	0.15431	1.2216							0.15431	0.2477	0.15431	0.2477
	0.15458	1.225	0.15458	1.225							0.15458	0.2481	0.15458	0.2481
	0.15486	1.2285	0.15486	1.2285							0.15486	0.2485	0.15486	0.2485
	0.15514	1.2319	0.15514	1.232							0.15514	0.2489	0.15514	0.2489
	0.15542	1.2354	0.15542	1.2354							0.15542	0.2493	0.15542	0.2493
	0.15569	1.2389	0.15569	1.2389							0.15569	0.2497	0.15569	0.2497
	0.15597	1.2424	0.15597	1.2424							0.15597	0.2501	0.15597	0.2501
	0.15625	1.2459	0.15625	1.2459							0.15625	0.2505	0.15625	0.2505
	0.15653	1.2494	0.15653	1.2494							0.15653	0.2509	0.15653	0.251
	0.15681	1.2528	0.15681	1.2529							0.15681	0.2514	0.15681	0.2514
	0.15708	1.2563	0.15708	1.2564							0.15708	0.2518	0.15708	0.2518
	0.15736	1.2599	0.15736	1.2599							0.15736	0.2522	0.15736	0.2522
	0.15764	1.2634	0.15764	1.2634							0.15764	0.2526	0.15764	0.2526
	0.15792	1.2669	0.15792	1.2669							0.15792	0.253	0.15792	0.253
	0.15819	1.2704	0.15819	1.2704							0.15819	0.2534	0.15819	0.2535
	0.15847	1.2739	0.15847	1.2739							0.15847	0.2539	0.15847	0.2539
	0.15875	1.2775	0.15875	1.2775							0.15875	0.2543	0.15875	0.2543
	0.15903	1.281	0.15903	1.281							0.15903	0.2547	0.15903	0.2547
	0.15931	1.2845	0.15931	1.2845							0.15931	0.2551	0.15931	0.2551
	0.15958	1.2881	0.15958	1.2881							0.15958	0.2556	0.15958	0.2556
	0.15986	1.2916	0.15986	1.2916							0.15986	0.256	0.15986	0.256
	0.16014	1.2952	0.16014	1.2952							0.16014	0.2564	0.16014	0.2564
	0.16042	1.2987	0.16042	1.2987							0.16042	0.2568	0.16042	0.2568
	0.16069	1.3023	0.16069	1.3023							0.16069	0.2573	0.16069	0.2573
	0.16097	1.3058	0.16097	1.3059							0.16097	0.2577	0.16097	0.2577
	0.16125	1.3094	0.16125	1.3094							0.16125	0.2581	0.16125	0.2581
	0.16153	1.313	0.16153	1.313							0.16153	0.2585	0.16153	0.2585
	0.16181	1.3166	0.16181	1.3166							0.16181	0.259	0.16181	0.259
	0.16208	1.3201	0.16208	1.3202							0.16208	0.2594	0.16208	0.2594
	0.16236	1.3237	0.16236	1.3237							0.16236	0.2598	0.16236	0.2598
	0.16264	1.3273	0.16264	1.3273							0.16264	0.2603	0.16264	0.2603
	0.16292	1.3309	0.16292	1.3309							0.16292	0.2607	0.16292	0.2607
	0.16319	1.3345	0.16319	1.3345							0.16319	0.2611	0.16319	0.2611
	0.16347	1.3381	0.16347	1.3381							0.16347	0.2616	0.16347	0.2616
	0.16375	1.3417	0.16375	1.3417							0.16375	0.262	0.16375	0.262
	0.16403	1.3453	0.16403	1.3453							0.16403	0.2624	0.16403	0.2624
	0.16431	1.349	0.16431	1.349							0.16431	0.2629	0.16431	0.2629
	0.16458	1.3526	0.16458	1.3526							0.16458	0.2633	0.16458	0.2633
	0.16486	1.3562	0.16486	1.3562							0.16486	0.2637	0.16486	0.2637
	0.16514	1.3598	0.16514	1.3598							0.16514	0.2642	0.16514	0.2642
	0.16542	1.3635	0.16542	1.3635							0.16542	0.2646	0.16542	0.2646
	0.16569	1.3671	0.16569	1.3671							0.16569	0.265	0.16569	0.2651
	0.16597	1.3707	0.16597	1.3707							0.16597	0.2655	0.16597	0.2655
	0.16625	1.3744	0.16625	1.3744							0.16625	0.2659	0.16625	0.2659
	0.16653	1.378	0.16653	1.378							0.16653	0.2664	0.16653	0.2664
	0.16681	1.3817	0.16681	1.3817							0.16681	0.2668	0.16681	0.2668
	0.16708	1.3853	0.16708	1.3853							0.16708	0.2673	0.16708	0.2673
	0.16736	1.389	0.16736	1.389							0.16736	0.2677	0.16736	0.2677
	0.16764	1.3927	0.16764	1.3927							0.16764	0.2682	0.16764	0.2682
	0.16792	1.3963	0.16792	1.3963							0.16792	0.2686	0.16792	0.2686
	0.16819	1.4	0.16819	1.4							0.16819	0.2691	0.16819	0.2691
	0.16847	1.4037	0.16847	1.4037							0.16847	0.2695	0.16847	0.2695
	0.16875	1.4074	0.16875	1.4074							0.16875	0.2699	0.16875	0.27
	0.16903	1.411	0.16903	1.411							0.16903	0.2704	0.16903	0.2704
	0.16931	1.4147	0.16931	1.4147							0.16931	0.2709	0.16931	0.2709
	0.16958	1.4184	0.16958	1.4184							0.16958	0.2713	0.16958	0.2713
	0.16986	1.4221	0.16986	1.4221							0.16986	0.2718	0.16986	0.2718
	0.17014	1.4258	0.17014	1.4258							0.17014	0.2722	0.17014	0.2722
	0.17042	1.4295	0.17042	1.4295							0.17042	0.2727	0.17042	0.2727
	0.17069	1.4332	0.17069	1.4332							0.17069	0.2731	0.17069	0.2731
	0.17097	1.4369	0.17097	1.4369							0.17097	0.2736	0.17097	0.2736
	0.17125	1.4406	0.17125	1.4406							0.17125	0.274	0.17125	0.274
	0.17153	1.4443	0.17153	1.4443							0.17153	0.2745	0.17153	0.2745
	0.17181	1.4481	0.17181	1.4481							0.17181	0.275	0.17181	0.275
	0.17208	1.4518	0.17208	1.4518							0.17208	0.2754	0.17208	0.2754
	0.17236	1.4555	0.17236	1.4555							0.17236	0.2759	0.17236	0.2759
	0.17264	1.4592	0.17264	1.4592							0.17264	0.2763	0.17264	0.2763
	0.17292	1.463	0.17292	1.463							0.17292	0.2768	0.17292	0.2768
	0.17319	1.4667	0.17319	1.4667							0.17319	0.2773	0.17319	0.2773
	0.17347	1.4704	0.17347	1.4704							0.17347	0.2777	0.17347	0.2777
	0.17375	1.4742	0.17375	1.4742							0.17375	0.2782	0.17375	0.2782
	0.17403	1.4779	0.17403	1.4779							0.17403	0.2787	0.17403	0.2787
	0.17431	1.4817	0.17431	1.4817							0.17431	0.2791	0.17431	0.2791
	0.17458	1.4854	0.17458	1.4854							0.17458	0.2796	0.17458	0.2796
	0.17486	1.4892	0.17486	1.4892							0.17486	0.2801	0.17486	0.2801
	0.17514	1.4929	0.17514	1.4929							0.17514	0.2805	0.17514	0.2805
	0.17542	1.4967	0.17542	1.4967							0.17542	0.281	0.17542	0.281
	0.17569	1.5004	0.17569	1.5005							0.17569	0.2815	0.17569	0.2815
	0.17597	1.5042	0.17597	1.5042							0.17597	0.282	0.17597	0.282
	0.17625	1.508	0.17625	1.508							0.17625	0.2824	0.17625	0.2824
	0.17653	1.5118	0.17653	1.5118							0.17653	0.2829	0.17653	0.2829
	0.17681	1.5155	0.17681	1.5155							0.17681	0.2834	0.17681	0.2834
	0.17708	1.5193	0.17708	1.5193							0.17708	0.2839	0.17708	0.2839
	0.17736	1.5231	0.17736	1.5257							0.17736	0.2843	0.17736	0.2843
	0.17764	1.5269	0.17764	1.5332							0.17764	0.2848	0.17764	0.2848
	0.17792	1.5306	0.17792	1.5406							0.17792	0.2853	0.17792	0.2853
	0.17819	1.5344	0.17819	1.5481							0.17819	0.2858	0.17819	0.2858
	0.17847	1.5382	0.17847	1.5556							0.17847	0.2863	0.17847	0.2863
	0.17875	1.542	0.17875	1.563							0.17875	0.2867	0.17875	0.2867
	0.17903	1.5457	0.17903	1.5705							0.17903	0.2872	0.17903	0.2872
	0.17931	1.5495	0.17931	1.578							0.17931	0.2877	0.17931	0.2877
	0.17958	1.5532	0.17958	1.5854							0.17958	0.2882	0.17958	0.2882
	0.17986	1.557	0.17986	1.5929							0.17986	0.2887	0.17986	0.2887
	0.18014	1.5608	0.18014	1.6004							0.18014	0.2892	0.18014	0.2892
	0.18042	1.5645	0.18042	1.6079							0.18042	0.2897	0.18042	0.2897
	0.18069	1.5683	0.18069	1.6154							0.18069	0.2902	0.18069	0.2902
	0.18097	1.572	0.18097	1.6228							0.18097	0.2906	0.18097	0.2907
	0.18125	1.5758	0.18125	1.6303							0.18125	0.2911	0.18125	0.2911
	0.18153	1.5795	0.18153	1.6378							0.18153	0.2916	0.18153	0.2916
	0.18181	1.5833	0.18181	1.6453							0.18181	0.2921	0.18181	0.2921
	0.18208	1.587	0.18208	1.6528							0.18208	0.2926	0.18208	0.2926
	0.18236	1.5908	0.18236	1.6603							0.18236	0.2931	0.18236	0.2931
	0.18264	1.5945	0.18264	1.6678							0.18264	0.2936	0.18264	0.2936
	0.18292	1.5982	0.18292	1.6752							0.18292	0.2941	0.18292	0.2941
	0.18319	1.602	0.18319	1.6827							0.18319	0.2946	0.18319	0.2946
	0.18347	1.6057	0.18347	1.6902							0.18347	0.2951	0.18347	0.2951
	0.18375	1.6094	0.18375	1.6977							0.18375	0.2956	0.18375	0.2956
	0.18403	1.6132	0.18403	1.7052							0.18403	0.2961	0.18403	0.2961
	0.18431	1.6169	0.18431	1.7127							0.18431	0.2966	0.18431	0.2966
	0.18458	1.6206	0.18458	1.7202							0.18458	0.2971	0.18458	0.2971
	0.18486	1.6243	0.18486	1.7277							0.18486	0.2976	0.18486	0.2976
	0.18514	1.6281	0.18514	1.7352							0.18514	0.2981	0.18514	0.2981
	0.18542	1.6318	0.18542	1.7427							0.18542	0.2986	0.18542	0.2987
	0.18569	1.6355	0.18569	1.7502							0.18569	0.2992	0.18569	0.2992
	0.18597	1.6392	0.18597	1.7577							0.18597	0.2997	0.18597	0.2997
	0.18625	1.6429	0.18625	1.7652							0.18625	0.3002	0.18625	0.3002
	0.18653	1.6466	0.18653	1.7727							0.18653	0.3007	0.18653	0.3007
	0.18681	1.6503	0.18681	1.7802							0.18681	0.3012	0.18681	0.3012
	0.18708	1.654	0.18708	1.7877							0.18708	0.3017	0.18708	0.3017
	0.18736	1.6577	0.18736	1.7952							0.18736	0.3022	0.18736	0.3022
	0.18764	1.6614	0.18764	1.8027							0.18764	0.3028	0.18764	0.3028
	0.18792	1.6651	0.18792	1.8102							0.18792	0.3033	0.18792	0.3033
	0.18819	1.6688	0.18819	1.8177							0.18819	0.3038	0.18819	0.3038
	0.18847	1.6725	0.18847	1.8252							0.18847	0.3043	0.18847	0.3043
	0.18875	1.6762	0.18875	1.8327							0.18875	0.3048	0.18875	0.3048
	0.18903	1.6798	0.18903	1.8402							0.18903	0.3054	0.18903	0.3054
	0.18931	1.6835	0.18931	1.8477							0.18931	0.3059	0.18931	0.3059
	0.18958	1.6872	0.18958	1.8552							0.18958	0.3064	0.18958	0.3064
	0.18986	1.6909	0.18986	1.8627							0.18986	0.3069	0.18986	0.3069
	0.19014	1.6945	0.19014	1.8702							0.19014	0.3075	0.19014	0.3075
	0.19042	1.6982	0.19042	1.8777							0.19042	0.308	0.19042	0.308
	0.19069	1.7019	0.19069	1.8852							0.19069	0.3085	0.19069	0.3085
	0.19097	1.7055	0.19097	1.8927							0.19097	0.309	0.19097	0.3091
	0.19125	1.7092	0.19125	1.9002							0.19125	0.3096	0.19125	0.3096
	0.19153	1.7129	0.19153	1.9077							0.19153	0.3101	0.19153	0.3101
	0.19181	1.7165	0.19181	1.9152							0.19181	0.3106	0.19181	0.3107
	0.19208	1.7202	0.19208	1.9227							0.19208	0.3112	0.19208	0.3112
	0.19236	1.7238	0.19236	1.9301							0.19236	0.3117	0.19236	0.3117
	0.19264	1.7275	0.19264	1.9376							0.19264	0.3123	0.19264	0.3123
	0.19292	1.7311	0.19292	1.9451							0.19292	0.3128	0.19292	0.3128
	0.19319	1.7347	0.19319	1.9526							0.19319	0.3133	0.19319	0.3133
	0.19347	1.7384	0.19347	1.9601							0.19347	0.3139	0.19347	0.3139
	0.19375	1.742	0.19375	1.9676							0.19375	0.3144	0.19375	0.3144
	0.19403	1.7457	0.19403	1.9751							0.19403	0.315	0.19403	0.315
	0.19431	1.7493	0.19431	1.9826							0.19431	0.3155	0.19431	0.3155
	0.19458	1.7529	0.19458	1.9901							0.19458	0.3161	0.19458	0.3161
	0.19486	1.7565	0.19486	1.9976							0.19486	0.3166	0.19486	0.3166
	0.19514	1.7602	0.19514	2.0051							0.19514	0.3172	0.19514	0.3172
	0.19542	1.7638	0.19542	2.0126							0.19542	0.3177	0.19542	0.3177
	0.19569	1.7674	0.19569	2.0201							0.19569	0.3183	0.19569	0.3183
	0.19597	1.771	0.19597	2.0275							0.19597	0.3188	0.19597	0.3188
	0.19625	1.7746	0.19625	2.035							0.19625	0.3194	0.19625	0.3194
	0.19653	1.7782	0.19653	2.0425							0.19653	0.3199	0.19653	0.3199
	0.19681	1.7818	0.19681	2.05							0.19681	0.3205	0.19681	0.3205
	0.19708	1.7854	0.19708	2.0575							0.19708	0.321	0.19708	0.321
	0.19736	1.789	0.19736	2.0649							0.19736	0.3216	0.19736	0.3216
	0.19764	1.7926	0.19764	2.0724							0.19764	0.3222	0.19764	0.3222
	0.19792	1.7962	0.19792	2.0799							0.19792	0.3227	0.19792	0.3227
	0.19819	1.7998	0.19819	2.0874							0.19819	0.3233	0.19819	0.3233
	0.19847	1.8033	0.19847	2.0949							0.19847	0.3239	0.19847	0.3239
	0.19875	1.8069	0.19875	2.1023							0.19875	0.3244	0.19875	0.3244
	0.19903	1.8105	0.19903	2.1098							0.19903	0.325	0.19903	0.325
	0.19931	1.8141	0.19931	2.1173							0.19931	0.3256	0.19931	0.3256
	0.19958	1.8176	0.19958	2.1247							0.19958	0.3261	0.19958	0.3261
	0.19986	1.8212	0.19986	2.1322							0.19986	0.3267	0.19986	0.3267
	0.20014	1.8248	0.20014	2.1397							0.20014	0.3273	0.20014	0.3273
	0.20042	1.8283	0.20042	2.1471							0.20042	0.3278	0.20042	0.3278
	0.20069	1.8319	0.20069	2.1546							0.20069	0.3284	0.20069	0.3284
	0.20097	1.8354	0.20097	2.162							0.20097	0.329	0.20097	0.329
	0.20125	1.839	0.20125	2.1695							0.20125	0.3296	0.20125	0.3296
	0.20153	1.8425	0.20153	2.177							0.20153	0.3302	0.20153	0.3302
	0.20181	1.8461	0.20181	2.1844							0.20181	0.3307	0.20181	0.3307
	0.20208	1.8496	0.20208	2.1919							0.20208	0.3313	0.20208	0.3313
	0.20236	1.8532	0.20236	2.1993							0.20236	0.3319	0.20236	0.3319
	0.20264	1.8567	0.20264	2.2068							0.20264	0.3325	0.20264	0.3325
	0.20292	1.8602	0.20292	2.2142							0.20292	0.3331	0.20292	0.3331
	0.20319	1.8637	0.20319	2.2216							0.20319	0.3337	0.20319	0.3337
	0.20347	1.8673	0.20347	2.2291							0.20347	0.3343	0.20347	0.3343
	0.20375	1.8708	0.20375	2.2365							0.20375	0.3348	0.20375	0.3348
	0.20403	1.8743	0.20403	2.244							0.20403	0.3354	0.20403	0.3354
	0.20431	1.8778	0.20431	2.2514							0.20431	0.336	0.20431	0.336
	0.20458	1.8813	0.20458	2.2588							0.20458	0.3366	0.20458	0.3366
	0.20486	1.8848	0.20486	2.2663							0.20486	0.3372	0.20486	0.3372
	0.20514	1.8883	0.20514	2.2737							0.20514	0.3378	0.20514	0.3378
	0.20542	1.8918	0.20542	2.2811							0.20542	0.3384	0.20542	0.3384
	0.20569	1.8953	0.20569	2.2885							0.20569	0.339	0.20569	0.339
	0.20597	1.8988	0.20597	2.2959							0.20597	0.3396	0.20597	0.3396
	0.20625	1.9023	0.20625	2.3033							0.20625	0.3402	0.20625	0.3402
	0.20653	1.9058	0.20653	2.3108							0.20653	0.3408	0.20653	0.3408
	0.20681	1.9092	0.20681	2.3182							0.20681	0.3414	0.20681	0.3414
	0.20708	1.9127	0.20708	2.3256							0.20708	0.342	0.20708	0.3421
	0.20736	1.9162	0.20736	2.333							0.20736	0.3427	0.20736	0.3427
	0.20764	1.9197	0.20764	2.3404							0.20764	0.3433	0.20764	0.3433
	0.20792	1.9231	0.20792	2.3478							0.20792	0.3439	0.20792	0.3439
	0.20819	1.9266	0.20819	2.3552							0.20819	0.3445	0.20819	0.3445
	0.20847	1.93	0.20847	2.3626							0.20847	0.3451	0.20847	0.3451
	0.20875	1.9335	0.20875	2.3699							0.20875	0.3457	0.20875	0.3457
	0.20903	1.9369	0.20903	2.3773							0.20903	0.3464	0.20903	0.3464
	0.20931	1.9404	0.20931	2.3847							0.20931	0.347	0.20931	0.347
	0.20958	1.9438	0.20958	2.3921							0.20958	0.3476	0.20958	0.3476
	0.20986	1.9473	0.20986	2.3995							0.20986	0.3482	0.20986	0.3482
	0.21014	1.9507	0.21014	2.4068							0.21014	0.3488	0.21014	0.3489
	0.21042	1.9541	0.21042	2.4142							0.21042	0.3495	0.21042	0.3495
	0.21069	1.9576	0.21069	2.4216							0.21069	0.3501	0.21069	0.3501
	0.21097	1.961	0.21097	2.4289							0.21097	0.3507	0.21097	0.3507
	0.21125	1.9644	0.21125	2.4363							0.21125	0.3514	0.21125	0.3514
	0.21153	1.9678	0.21153	2.4436							0.21153	0.352	0.21153	0.352
	0.21181	1.9712	0.21181	2.451							0.21181	0.3526	0.21181	0.3526
	0.21208	1.9746	0.21208	2.4583							0.21208	0.3533	0.21208	0.3533
	0.21236	1.978	0.21236	2.4657							0.21236	0.3539	0.21236	0.3539
	0.21264	1.9814	0.21264	2.473							0.21264	0.3546	0.21264	0.3546
	0.21292	1.9848	0.21292	2.4803							0.21292	0.3552	0.21292	0.3552
	0.21319	1.9882	0.21319	2.4877							0.21319	0.3558	0.21319	0.3558
	0.21347	1.9916	0.21347	2.495							0.21347	0.3565	0.21347	0.3565
	0.21375	1.995	0.21375	2.5023							0.21375	0.3571	0.21375	0.3571
	0.21403	1.9984	0.21403	2.5096							0.21403	0.3578	0.21403	0.3578
	0.21431	2.0017	0.21431	2.517							0.21431	0.3584	0.21431	0.3584
	0.21458	2.0051	0.21458	2.5243							0.21458	0.3591	0.21458	0.3591
	0.21486	2.0085	0.21486	2.5316							0.21486	0.3597	0.21486	0.3597
	0.21514	2.0118	0.21514	2.5389							0.21514	0.3604	0.21514	0.3604
	0.21542	2.0152	0.21542	2.5462							0.21542	0.361	0.21542	0.361
	0.21569	2.0185	0.21569	2.5535							0.21569	0.3617	0.21569	0.3617
	0.21597	2.0219	0.21597	2.5608							0.21597	0.3624	0.21597	0.3624
	0.21625	2.0252	0.21625	2.568							0.21625	0.363	0.21625	0.363
	0.21653	2.0286	0.21653	2.5753							0.21653	0.3637	0.21653	0.3637
	0.21681	2.0319	0.21681	2.5826							0.21681	0.3643	0.21681	0.3644
	0.21708	2.0353	0.21708	2.5899							0.21708	0.365	0.21708	0.365
	0.21736	2.0386	0.21736	2.5971							0.21736	0.3657	0.21736	0.3657
	0.21764	2.0419	0.21764	2.6044							0.21764	0.3663	0.21764	0.3664
	0.21792	2.0452	0.21792	2.6117							0.21792	0.367	0.21792	0.367
	0.21819	2.0485	0.21819	2.6189							0.21819	0.3677	0.21819	0.3677
	0.21847	2.0519	0.21847	2.6262							0.21847	0.3684	0.21847	0.3684
	0.21875	2.0552	0.21875	2.6334							0.21875	0.369	0.21875	0.3691
	0.21903	2.0585	0.21903	2.6407							0.21903	0.3697	0.21903	0.3697
	0.21931	2.0618	0.21931	2.6479							0.21931	0.3704	0.21931	0.3704
	0.21958	2.0651	0.21958	2.6551							0.21958	0.3711	0.21958	0.3711
	0.21986	2.0684	0.21986	2.6623							0.21986	0.3718	0.21986	0.3718
	0.22014	2.0716	0.22014	2.6696							0.22014	0.3725	0.22014	0.3725
	0.22042	2.0749	0.22042	2.6768							0.22042	0.3731	0.22042	0.3731
	0.22069	2.0782	0.22069	2.684							0.22069	0.3738	0.22069	0.3738
	0.22097	2.0815	0.22097	2.6912							0.22097	0.3745	0.22097	0.3745
	0.22125	2.0847	0.22125	2.6984							0.22125	0.3752	0.22125	0.3752
	0.22153	2.088	0.22153	2.7056							0.22153	0.3759	0.22153	0.3759
	0.22181	2.0913	0.22181	2.7128							0.22181	0.3766	0.22181	0.3766
	0.22208	2.0945	0.22208	2.72							0.22208	0.3773	0.22208	0.3773
	0.22236	2.0978	0.22236	2.7271							0.22236	0.378	0.22236	0.378
	0.22264	2.101	0.22264	2.7343							0.22264	0.3787	0.22264	0.3787
	0.22292	2.1043	0.22292	2.7415							0.22292	0.3794	0.22292	0.3794
	0.22319	2.1075	0.22319	2.7486							0.22319	0.3801	0.22319	0.3801
	0.22347	2.1107	0.22347	2.7558							0.22347	0.3808	0.22347	0.3808
	0.22375	2.114	0.22375	2.763							0.22375	0.3815	0.22375	0.3815
	0.22403	2.1172	0.22403	2.7701							0.22403	0.3822	0.22403	0.3822
	0.22431	2.1204	0.22431	2.7772							0.22431	0.3829	0.22431	0.3829
	0.22458	2.1236	0.22458	2.7844							0.22458	0.3836	0.22458	0.3837
	0.22486	2.1268	0.22486	2.7915							0.22486	0.3844	0.22486	0.3844
	0.22514	2.1301	0.22514	2.7986							0.22514	0.3851	0.22514	0.3851
	0.22542	2.1333	0.22542	2.8058							0.22542	0.3858	0.22542	0.3858
	0.22569	2.1365	0.22569	2.8129							0.22569	0.3865	0.22569	0.3865
	0.22597	2.1396	0.22597	2.82							0.22597	0.3872	0.22597	0.3872
	0.22625	2.1428	0.22625	2.8271							0.22625	0.388	0.22625	0.388
	0.22653	2.146	0.22653	2.8342							0.22653	0.3887	0.22653	0.3887
	0.22681	2.1492	0.22681	2.8413							0.22681	0.3894	0.22681	0.3894
	0.22708	2.1524	0.22708	2.8484							0.22708	0.3901	0.22708	0.3902
	0.22736	2.1555	0.22736	2.8554							0.22736	0.3909	0.22736	0.3909
	0.22764	2.1587	0.22764	2.8625							0.22764	0.3916	0.22764	0.3916
	0.22792	2.1619	0.22792	2.8696							0.22792	0.3923	0.22792	0.3924
	0.22819	2.165	0.22819	2.8766							0.22819	0.3931	0.22819	0.3931
	0.22847	2.1682	0.22847	2.8837							0.22847	0.3938	0.22847	0.3938
	0.22875	2.1713	0.22875	2.8907							0.22875	0.3946	0.22875	0.3946
	0.22903	2.1745	0.22903	2.8978							0.22903	0.3953	0.22903	0.3953
	0.22931	2.1776	0.22931	2.9048							0.22931	0.396	0.22931	0.3961
	0.22958	2.1807	0.22958	2.9118							0.22958	0.3968	0.22958	0.3968
	0.22986	2.1839	0.22986	2.9189							0.22986	0.3975	0.22986	0.3975
	0.23014	2.187	0.23014	2.9259							0.23014	0.3983	0.23014	0.3983
	0.23042	2.1901	0.23042	2.9329							0.23042	0.399	0.23042	0.3991
	0.23069	2.1932	0.23069	2.9399							0.23069	0.3998	0.23069	0.3998
	0.23097	2.1963	0.23097	2.9469							0.23097	0.4006	0.23097	0.4006
	0.23125	2.1995	0.23125	2.9539							0.23125	0.4013	0.23125	0.4013
	0.23153	2.2026	0.23153	2.9609							0.23153	0.4021	0.23153	0.4021
	0.23181	2.2057	0.23181	2.9678							0.23181	0.4028	0.23181	0.4028
	0.23208	2.2087	0.23208	2.9748							0.23208	0.4036	0.23208	0.4036
	0.23236	2.2118	0.23236	2.9818							0.23236	0.4044	0.23236	0.4044
	0.23264	2.2149	0.23264	2.9887							0.23264	0.4051	0.23264	0.4051
	0.23292	2.218	0.23292	2.9957							0.23292	0.4059	0.23292	0.4059
	0.23319	2.2211	0.23319	3.0026							0.23319	0.4067	0.23319	0.4067
	0.23347	2.2241	0.23347	3.0096							0.23347	0.4074	0.23347	0.4074
	0.23375	2.2272	0.23375	3.0165							0.23375	0.4082	0.23375	0.4082
	0.23403	2.2303	0.23403	3.0234							0.23403	0.409	0.23403	0.409
	0.23431	2.2333	0.23431	3.0304							0.23431	0.4098	0.23431	0.4098
	0.23458	2.2364	0.23458	3.0373							0.23458	0.4106	0.23458	0.4106
	0.23486	2.2394	0.23486	3.0442							0.23486	0.4113	0.23486	0.4113
	0.23514	2.2424	0.23514	3.0511							0.23514	0.4121	0.23514	0.4121
	0.23542	2.2455	0.23542	3.058							0.23542	0.4129	0.23542	0.4129
	0.23569	2.2485	0.23569	3.0648							0.23569	0.4137	0.23569	0.4137
	0.23597	2.2515	0.23597	3.0717							0.23597	0.4145	0.23597	0.4145
	0.23625	2.2546	0.23625	3.0786							0.23625	0.4153	0.23625	0.4153
	0.23653	2.2576	0.23653	3.0854							0.23653	0.4161	0.23653	0.4161
	0.23681	2.2606	0.23681	3.0923							0.23681	0.4169	0.23681	0.4169
	0.23708	2.2636	0.23708	3.0992							0.23708	0.4177	0.23708	0.4177
	0.23736	2.2666	0.23736	3.106							0.23736	0.4185	0.23736	0.4185
	0.23764	2.2696	0.23764	3.1128							0.23764	0.4193	0.23764	0.4193
	0.23792	2.2726	0.23792	3.1197							0.23792	0.4201	0.23792	0.4201
	0.23819	2.2756	0.23819	3.1265							0.23819	0.4209	0.23819	0.4209
	0.23847	2.2785	0.23847	3.1333							0.23847	0.4217	0.23847	0.4217
	0.23875	2.2815	0.23875	3.1401							0.23875	0.4225	0.23875	0.4225
	0.23903	2.2845	0.23903	3.1469							0.23903	0.4233	0.23903	0.4233
	0.23931	2.2875	0.23931	3.1537							0.23931	0.4241	0.23931	0.4241
	0.23958	2.2904	0.23958	3.1605							0.23958	0.4249	0.23958	0.425
	0.23986	2.2934	0.23986	3.1672							0.23986	0.4258	0.23986	0.4258
	0.24014	2.2963	0.24014	3.174							0.24014	0.4266	0.24014	0.4266
	0.24042	2.2993	0.24042	3.1808							0.24042	0.4274	0.24042	0.4274
	0.24069	2.3022	0.24069	3.1875							0.24069	0.4282	0.24069	0.4282
	0.24097	2.3052	0.24097	3.1943							0.24097	0.4291	0.24097	0.4291
	0.24125	2.3081	0.24125	3.201							0.24125	0.4299	0.24125	0.4299
	0.24153	2.311	0.24153	3.2077							0.24153	0.4307	0.24153	0.4307
	0.24181	2.3139	0.24181	3.2145							0.24181	0.4316	0.24181	0.4316
	0.24208	2.3169	0.24208	3.2212							0.24208	0.4324	0.24208	0.4324
	0.24236	2.3198	0.24236	3.2279							0.24236	0.4332	0.24236	0.4332
	0.24264	2.3227	0.24264	3.2346							0.24264	0.4341	0.24264	0.4341
	0.24292	2.3256	0.24292	3.2413							0.24292	0.4349	0.24292	0.4349
	0.24319	2.3285	0.24319	3.248							0.24319	0.4358	0.24319	0.4358
	0.24347	2.3314	0.24347	3.2546							0.24347	0.4366	0.24347	0.4366
	0.24375	2.3343	0.24375	3.2613							0.24375	0.4375	0.24375	0.4375
	0.24403	2.3372	0.24403	3.268							0.24403	0.4383	0.24403	0.4383
	0.24431	2.34	0.24431	3.2746							0.24431	0.4392	0.24431	0.4392
	0.24458	2.3429	0.24458	3.2813							0.24458	0.44	0.24458	0.44
	0.24486	2.3458	0.24486	3.2879							0.24486	0.4409	0.24486	0.4409
	0.24514	2.3486	0.24514	3.2945							0.24514	0.4417	0.24514	0.4417
	0.24542	2.3515	0.24542	3.3011							0.24542	0.4426	0.24542	0.4426
	0.24569	2.3544	0.24569	3.3078							0.24569	0.4434	0.24569	0.4435
	0.24597	2.3572	0.24597	3.3144							0.24597	0.4443	0.24597	0.4443
	0.24625	2.36	0.24625	3.321							0.24625	0.4452	0.24625	0.4452
	0.24653	2.3629	0.24653	3.3276							0.24653	0.4461	0.24653	0.4461
	0.24681	2.3657	0.24681	3.3341							0.24681	0.4469	0.24681	0.4469
	0.24708	2.3685	0.24708	3.3407							0.24708	0.4478	0.24708	0.4478
	0.24736	2.3714	0.24736	3.3473							0.24736	0.4487	0.24736	0.4487
	0.24764	2.3742	0.24764	3.3538							0.24764	0.4496	0.24764	0.4496
	0.24792	2.377	0.24792	3.3604							0.24792	0.4504	0.24792	0.4504
	0.24819	2.3798	0.24819	3.3669							0.24819	0.4513	0.24819	0.4513
	0.24847	2.3826	0.24847	3.3734							0.24847	0.4522	0.24847	0.4522
	0.24875	2.3854	0.24875	3.38							0.24875	0.4531	0.24875	0.4531
	0.24903	2.3882	0.24903	3.3865							0.24903	0.454	0.24903	0.454
	0.24931	2.391	0.24931	3.393							0.24931	0.4549	0.24931	0.4549
	0.24958	2.3938	0.24958	3.3995							0.24958	0.4558	0.24958	0.4558
	0.24986	2.3966	0.24986	3.406							0.24986	0.4567	0.24986	0.4567
	0.25014	2.3993	0.25014	3.4125							0.25014	0.4576	0.25014	0.4576
	0.25042	2.4021	0.25042	3.4189							0.25042	0.4585	0.25042	0.4585
	0.25069	2.4049	0.25069	3.4254							0.25069	0.4594	0.25069	0.4594
	0.25097	2.4076	0.25097	3.4319							0.25097	0.4603	0.25097	0.4603
	0.25125	2.4104	0.25125	3.4383							0.25125	0.4612	0.25125	0.4612
	0.25153	2.4131	0.25153	3.4448							0.25153	0.4621	0.25153	0.4621
	0.25181	2.4159	0.25181	3.4512							0.25181	0.463	0.25181	0.463
	0.25208	2.4186	0.25208	3.4576							0.25208	0.4639	0.25208	0.4639
	0.25236	2.4213	0.25236	3.464							0.25236	0.4648	0.25236	0.4648
	0.25264	2.4241	0.25264	3.4704							0.25264	0.4657	0.25264	0.4658
	0.25292	2.4268	0.25292	3.4768							0.25292	0.4667	0.25292	0.4667
	0.25319	2.4295	0.25319	3.4832							0.25319	0.4676	0.25319	0.4676
	0.25347	2.4322	0.25347	3.4896							0.25347	0.4685	0.25347	0.4685
	0.25375	2.4349	0.25375	3.496							0.25375	0.4694	0.25375	0.4695
	0.25403	2.4376	0.25403	3.5023							0.25403	0.4704	0.25403	0.4704
	0.25431	2.4403	0.25431	3.5087							0.25431	0.4713	0.25431	0.4713
	0.25458	2.443	0.25458	3.515							0.25458	0.4722	0.25458	0.4722
	0.25486	2.4457	0.25486	3.5214							0.25486	0.4732	0.25486	0.4732
	0.25514	2.4484	0.25514	3.5277							0.25514	0.4741	0.25514	0.4741
	0.25542	2.4511	0.25542	3.534							0.25542	0.4751	0.25542	0.4751
	0.25569	2.4538	0.25569	3.5403							0.25569	0.476	0.25569	0.476
	0.25597	2.4564	0.25597	3.5466							0.25597	0.477	0.25597	0.477
	0.25625	2.4591	0.25625	3.5529							0.25625	0.4779	0.25625	0.4779
	0.25653	2.4618	0.25653	3.5592							0.25653	0.4789	0.25653	0.4789
	0.25681	2.4644	0.25681	3.5655							0.25681	0.4798	0.25681	0.4798
	0.25708	2.4671	0.25708	3.5717							0.25708	0.4808	0.25708	0.4808
	0.25736	2.4697	0.25736	3.578							0.25736	0.4817	0.25736	0.4817
	0.25764	2.4723	0.25764	3.5843							0.25764	0.4827	0.25764	0.4827
	0.25792	2.475	0.25792	3.5905							0.25792	0.4836	0.25792	0.4837
	0.25819	2.4776	0.25819	3.5967							0.25819	0.4846	0.25819	0.4846
	0.25847	2.4802	0.25847	3.603							0.25847	0.4856	0.25847	0.4856
	0.25875	2.4828	0.25875	3.6092							0.25875	0.4866	0.25875	0.4866
	0.25903	2.4855	0.25903	3.6154							0.25903	0.4875	0.25903	0.4875
	0.25931	2.4881	0.25931	3.6216							0.25931	0.4885	0.25931	0.4885
	0.25958	2.4907	0.25958	3.6278							0.25958	0.4895	0.25958	0.4895
	0.25986	2.4933	0.25986	3.6339							0.25986	0.4905	0.25986	0.4905
	0.26014	2.4959	0.26014	3.6401							0.26014	0.4914	0.26014	0.4914
	0.26042	2.4984	0.26042	3.6463							0.26042	0.4924	0.26042	0.4924
	0.26069	2.501	0.26069	3.6524							0.26069	0.4934	0.26069	0.4934
	0.26097	2.5036	0.26097	3.6586							0.26097	0.4944	0.26097	0.4944
	0.26125	2.5062	0.26125	3.6647							0.26125	0.4954	0.26125	0.4954
	0.26153	2.5087	0.26153	3.6708							0.26153	0.4964	0.26153	0.4964
	0.26181	2.5113	0.26181	3.6769							0.26181	0.4974	0.26181	0.4974
	0.26208	2.5139	0.26208	3.683							0.26208	0.4984	0.26208	0.4984
	0.26236	2.5164	0.26236	3.6891							0.26236	0.4994	0.26236	0.4994
	0.26264	2.519	0.26264	3.6952							0.26264	0.5004	0.26264	0.5004
	0.26292	2.5215	0.26292	3.7013							0.26292	0.5014	0.26292	0.5014
	0.26319	2.524	0.26319	3.7074							0.26319	0.5024	0.26319	0.5024
	0.26347	2.5266	0.26347	3.7134							0.26347	0.5034	0.26347	0.5034
	0.26375	2.5291	0.26375	3.7195							0.26375	0.5044	0.26375	0.5044
	0.26403	2.5316	0.26403	3.7255							0.26403	0.5055	0.26403	0.5055
	0.26431	2.5342	0.26431	3.7315							0.26431	0.5065	0.26431	0.5065
	0.26458	2.5367	0.26458	3.7376							0.26458	0.5075	0.26458	0.5075
	0.26486	2.5392	0.26486	3.7436							0.26486	0.5085	0.26486	0.5085
	0.26514	2.5417	0.26514	3.7496							0.26514	0.5095	0.26514	0.5096
	0.26542	2.5442	0.26542	3.7556							0.26542	0.5106	0.26542	0.5106
	0.26569	2.5467	0.26569	3.7616							0.26569	0.5116	0.26569	0.5116
	0.26597	2.5492	0.26597	3.7676							0.26597	0.5126	0.26597	0.5126
	0.26625	2.5516	0.26625	3.7735							0.26625	0.5137	0.26625	0.5137
	0.26653	2.5541	0.26653	3.7795							0.26653	0.5147	0.26653	0.5147
	0.26681	2.5566	0.26681	3.7854							0.26681	0.5158	0.26681	0.5158
	0.26708	2.5591	0.26708	3.7914							0.26708	0.5168	0.26708	0.5168
	0.26736	2.5615	0.26736	3.7973							0.26736	0.5179	0.26736	0.5179
	0.26764	2.564	0.26764	3.8032							0.26764	0.5189	0.26764	0.5189
	0.26792	2.5664	0.26792	3.8091							0.26792	0.52	0.26792	0.52
	0.26819	2.5689	0.26819	3.815							0.26819	0.521	0.26819	0.521
	0.26847	2.5713	0.26847	3.8209							0.26847	0.5221	0.26847	0.5221
	0.26875	2.5738	0.26875	3.8268							0.26875	0.5231	0.26875	0.5231
	0.26903	2.5762	0.26903	3.8327							0.26903	0.5242	0.26903	0.5242
	0.26931	2.5786	0.26931	3.8386							0.26931	0.5253	0.26931	0.5253
	0.26958	2.581	0.26958	3.8444							0.26958	0.5263	0.26958	0.5263
	0.26986	2.5835	0.26986	3.8503							0.26986	0.5274	0.26986	0.5274
	0.27014	2.5859	0.27014	3.8561							0.27014	0.5285	0.27014	0.5285
	0.27042	2.5883	0.27042	3.8619							0.27042	0.5296	0.27042	0.5296
	0.27069	2.5907	0.27069	3.8677							0.27069	0.5306	0.27069	0.5306
	0.27097	2.5931	0.27097	3.8736							0.27097	0.5317	0.27097	0.5317
	0.27125	2.5955	0.27125	3.8794							0.27125	0.5328	0.27125	0.5328
	0.27153	2.5979	0.27153	3.8851							0.27153	0.5339	0.27153	0.5339
	0.27181	2.6003	0.27181	3.8909							0.27181	0.535	0.27181	0.535
	0.27208	2.6026	0.27208	3.8967							0.27208	0.5361	0.27208	0.5361
	0.27236	2.605	0.27236	3.9025							0.27236	0.5372	0.27236	0.5372
	0.27264	2.6074	0.27264	3.9082							0.27264	0.5383	0.27264	0.5383
	0.27292	2.6097	0.27292	3.914							0.27292	0.5394	0.27292	0.5394
	0.27319	2.6121	0.27319	3.9197							0.27319	0.5405	0.27319	0.5405
	0.27347	2.6145	0.27347	3.9254							0.27347	0.5416	0.27347	0.5416
	0.27375	2.6168	0.27375	3.9311							0.27375	0.5427	0.27375	0.5427
	0.27403	2.6191	0.27403	3.9368							0.27403	0.5438	0.27403	0.5438
	0.27431	2.6215	0.27431	3.9426							0.27431	0.5449	0.27431	0.5449
	0.27458	2.6238	0.27458	3.9482							0.27458	0.546	0.27458	0.546
	0.27486	2.6262	0.27486	3.9539							0.27486	0.5471	0.27486	0.5471
	0.27514	2.6285	0.27514	3.9596							0.27514	0.5483	0.27514	0.5483
	0.27542	2.6308	0.27542	3.9652							0.27542	0.5494	0.27542	0.5494
	0.27569	2.6331	0.27569	3.9709							0.27569	0.5505	0.27569	0.5505
	0.27597	2.6354	0.27597	3.9765							0.27597	0.5516	0.27597	0.5516
	0.27625	2.6377	0.27625	3.9822							0.27625	0.5528	0.27625	0.5528
	0.27653	2.64	0.27653	3.9878							0.27653	0.5539	0.27653	0.5539
	0.27681	2.6423	0.27681	3.9934							0.27681	0.555	0.27681	0.5551
	0.27708	2.6446	0.27708	3.999							0.27708	0.5562	0.27708	0.5562
	0.27736	2.6469	0.27736	4.0046							0.27736	0.5573	0.27736	0.5573
	0.27764	2.6492	0.27764	4.0102							0.27764	0.5585	0.27764	0.5585
	0.27792	2.6515	0.27792	4.0157							0.27792	0.5596	0.27792	0.5596
	0.27819	2.6537	0.27819	4.0213							0.27819	0.5608	0.27819	0.5608
	0.27847	2.656	0.27847	4.0269							0.27847	0.5619	0.27847	0.5619
	0.27875	2.6583	0.27875	4.0324							0.27875	0.5631	0.27875	0.5631
	0.27903	2.6605	0.27903	4.038							0.27903	0.5643	0.27903	0.5643
	0.27931	2.6628	0.27931	4.0435							0.27931	0.5654	0.27931	0.5654
	0.27958	2.665	0.27958	4.049							0.27958	0.5666	0.27958	0.5666
	0.27986	2.6673	0.27986	4.0545							0.27986	0.5678	0.27986	0.5678
	0.28014	2.6695	0.28014	4.06							0.28014	0.5689	0.28014	0.5689
	0.28042	2.6717	0.28042	4.0655							0.28042	0.5701	0.28042	0.5701
	0.28069	2.674	0.28069	4.071							0.28069	0.5713	0.28069	0.5713
	0.28097	2.6762	0.28097	4.0764							0.28097	0.5725	0.28097	0.5725
	0.28125	2.6784	0.28125	4.0819							0.28125	0.5736	0.28125	0.5737
	0.28153	2.6806	0.28153	4.0874							0.28153	0.5748	0.28153	0.5748
	0.28181	2.6828	0.28181	4.0928							0.28181	0.576	0.28181	0.576
	0.28208	2.685	0.28208	4.0982							0.28208	0.5772	0.28208	0.5772
	0.28236	2.6872	0.28236	4.1037							0.28236	0.5784	0.28236	0.5784
	0.28264	2.6894	0.28264	4.1091							0.28264	0.5796	0.28264	0.5796
	0.28292	2.6916	0.28292	4.1145							0.28292	0.5808	0.28292	0.5808
	0.28319	2.6938	0.28319	4.1199							0.28319	0.582	0.28319	0.582
	0.28347	2.696	0.28347	4.1253							0.28347	0.5832	0.28347	0.5832
	0.28375	2.6982	0.28375	4.1306							0.28375	0.5844	0.28375	0.5844
	0.28403	2.7003	0.28403	4.136							0.28403	0.5856	0.28403	0.5857
	0.28431	2.7025	0.28431	4.1413							0.28431	0.5869	0.28431	0.5869
	0.28458	2.7047	0.28458	4.1467							0.28458	0.5881	0.28458	0.5881
	0.28486	2.7068	0.28486	4.152							0.28486	0.5893	0.28486	0.5893
	0.28514	2.709	0.28514	4.1574							0.28514	0.5905	0.28514	0.5905
	0.28542	2.7111	0.28542	4.1627							0.28542	0.5918	0.28542	0.5918
	0.28569	2.7133	0.28569	4.168							0.28569	0.593	0.28569	0.593
	0.28597	2.7154	0.28597	4.1733							0.28597	0.5942	0.28597	0.5942
	0.28625	2.7176	0.28625	4.1786							0.28625	0.5955	0.28625	0.5955
	0.28653	2.7197	0.28653	4.1839							0.28653	0.5967	0.28653	0.5967
	0.28681	2.7218	0.28681	4.1891							0.28681	0.5979	0.28681	0.5979
	0.28708	2.7239	0.28708	4.1944							0.28708	0.5992	0.28708	0.5992
	0.28736	2.726	0.28736	4.1996							0.28736	0.6004	0.28736	0.6004
	0.28764	2.7282	0.28764	4.2049							0.28764	0.6017	0.28764	0.6017
	0.28792	2.7303	0.28792	4.2101							0.28792	0.6029	0.28792	0.6029
	0.28819	2.7324	0.28819	4.2153							0.28819	0.6042	0.28819	0.6042
	0.28847	2.7345	0.28847	4.2206							0.28847	0.6055	0.28847	0.6055
	0.28875	2.7366	0.28875	4.2258							0.28875	0.6067	0.28875	0.6067
	0.28903	2.7386	0.28903	4.231							0.28903	0.608	0.28903	0.608
	0.28931	2.7407	0.28931	4.2361							0.28931	0.6093	0.28931	0.6093
	0.28958	2.7428	0.28958	4.2413							0.28958	0.6105	0.28958	0.6105
	0.28986	2.7449	0.28986	4.2465							0.28986	0.6118	0.28986	0.6118
	0.29014	2.747	0.29014	4.2516							0.29014	0.6131	0.29014	0.6131
	0.29042	2.749	0.29042	4.2568							0.29042	0.6144	0.29042	0.6144
	0.29069	2.7511	0.29069	4.2619							0.29069	0.6157	0.29069	0.6157
	0.29097	2.7531	0.29097	4.2671							0.29097	0.6169	0.29097	0.617
	0.29125	2.7552	0.29125	4.2722							0.29125	0.6182	0.29125	0.6182
	0.29153	2.7572	0.29153	4.2773							0.29153	0.6195	0.29153	0.6195
	0.29181	2.7593	0.29181	4.2824							0.29181	0.6208	0.29181	0.6208
	0.29208	2.7613	0.29208	4.2875							0.29208	0.6221	0.29208	0.6221
	0.29236	2.7633	0.29236	4.2926							0.29236	0.6234	0.29236	0.6234
	0.29264	2.7654	0.29264	4.2976							0.29264	0.6247	0.29264	0.6248
	0.29292	2.7674	0.29292	4.3027							0.29292	0.6261	0.29292	0.6261
	0.29319	2.7694	0.29319	4.3078							0.29319	0.6274	0.29319	0.6274
	0.29347	2.7714	0.29347	4.3128							0.29347	0.6287	0.29347	0.6287
	0.29375	2.7734	0.29375	4.3178							0.29375	0.63	0.29375	0.63
	0.29403	2.7755	0.29403	4.3229							0.29403	0.6313	0.29403	0.6313
	0.29431	2.7775	0.29431	4.3279							0.29431	0.6327	0.29431	0.6327
	0.29458	2.7795	0.29458	4.3329							0.29458	0.634	0.29458	0.634
	0.29486	2.7815	0.29486	4.3379							0.29486	0.6353	0.29486	0.6353
	0.29514	2.7834	0.29514	4.3429							0.29514	0.6367	0.29514	0.6367
	0.29542	2.7854	0.29542	4.3479							0.29542	0.638	0.29542	0.638
	0.29569	2.7874	0.29569	4.3528							0.29569	0.6393	0.29569	0.6393
	0.29597	2.7894	0.29597	4.3578							0.29597	0.6407	0.29597	0.6407
	0.29625	2.7914	0.29625	4.3627							0.29625	0.642	0.29625	0.642
	0.29653	2.7933	0.29653	4.3677							0.29653	0.6434	0.29653	0.6434
	0.29681	2.7953	0.29681	4.3726							0.29681	0.6447	0.29681	0.6447
	0.29708	2.7972	0.29708	4.3775							0.29708	0.6461	0.29708	0.6461
	0.29736	2.7992	0.29736	4.3825							0.29736	0.6475	0.29736	0.6475
	0.29764	2.8011	0.29764	4.3874							0.29764	0.6488	0.29764	0.6488
	0.29792	2.8031	0.29792	4.3923							0.29792	0.6502	0.29792	0.6502
	0.29819	2.805	0.29819	4.3971							0.29819	0.6516	0.29819	0.6516
	0.29847	2.807	0.29847	4.402							0.29847	0.6529	0.29847	0.653
	0.29875	2.8089	0.29875	4.4069							0.29875	0.6543	0.29875	0.6543
	0.29903	2.8108	0.29903	4.4117							0.29903	0.6557	0.29903	0.6557
	0.29931	2.8127	0.29931	4.4166							0.29931	0.6571	0.29931	0.6571
	0.29958	2.8147	0.29958	4.4214							0.29958	0.6585	0.29958	0.6585
	0.29986	2.8166	0.29986	4.4263							0.29986	0.6599	0.29986	0.6599
	0.30014	2.8185	0.30014	4.4311							0.30014	0.6613	0.30014	0.6613
	0.30042	2.8204	0.30042	4.4359							0.30042	0.6627	0.30042	0.6627
	0.30069	2.8223	0.30069	4.4407							0.30069	0.6641	0.30069	0.6641
	0.30097	2.8242	0.30097	4.4455							0.30097	0.6655	0.30097	0.6655
	0.30125	2.8261	0.30125	4.4503							0.30125	0.6669	0.30125	0.6669
	0.30153	2.828	0.30153	4.4551							0.30153	0.6683	0.30153	0.6683
	0.30181	2.8299	0.30181	4.4598							0.30181	0.6697	0.30181	0.6697
	0.30208	2.8317	0.30208	4.4646							0.30208	0.6711	0.30208	0.6711
	0.30236	2.8336	0.30236	4.4693							0.30236	0.6725	0.30236	0.6726
	0.30264	2.8355	0.30264	4.4741							0.30264	0.674	0.30264	0.674
	0.30292	2.8374	0.30292	4.4788							0.30292	0.6754	0.30292	0.6754
	0.30319	2.8392	0.30319	4.4835							0.30319	0.6768	0.30319	0.6768
	0.30347	2.8411	0.30347	4.4883							0.30347	0.6783	0.30347	0.6783
	0.30375	2.8429	0.30375	4.493							0.30375	0.6797	0.30375	0.6797
	0.30403	2.8448	0.30403	4.4977							0.30403	0.6812	0.30403	0.6812
	0.30431	2.8466	0.30431	4.5023							0.30431	0.6826	0.30431	0.6826
	0.30458	2.8485	0.30458	4.507							0.30458	0.6841	0.30458	0.6841
	0.30486	2.8503	0.30486	4.5117							0.30486	0.6855	0.30486	0.6855
	0.30514	2.8522	0.30514	4.5163							0.30514	0.687	0.30514	0.687
	0.30542	2.854	0.30542	4.521							0.30542	0.6884	0.30542	0.6884
	0.30569	2.8558	0.30569	4.5256							0.30569	0.6899	0.30569	0.6899
	0.30597	2.8576	0.30597	4.5303							0.30597	0.6914	0.30597	0.6914
	0.30625	2.8594	0.30625	4.5349							0.30625	0.6928	0.30625	0.6928
	0.30653	2.8613	0.30653	4.5395							0.30653	0.6943	0.30653	0.6943
	0.30681	2.8631	0.30681	4.5441							0.30681	0.6958	0.30681	0.6958
	0.30708	2.8649	0.30708	4.5487							0.30708	0.6973	0.30708	0.6973
	0.30736	2.8667	0.30736	4.5533							0.30736	0.6987	0.30736	0.6987
	0.30764	2.8685	0.30764	4.5579							0.30764	0.7002	0.30764	0.7002
	0.30792	2.8703	0.30792	4.5624							0.30792	0.7017	0.30792	0.7017
	0.30819	2.8721	0.30819	4.567							0.30819	0.7032	0.30819	0.7032
	0.30847	2.8738	0.30847	4.5715							0.30847	0.7047	0.30847	0.7047
	0.30875	2.8756	0.30875	4.5761							0.30875	0.7062	0.30875	0.7062
	0.30903	2.8774	0.30903	4.5806							0.30903	0.7077	0.30903	0.7077
	0.30931	2.8792	0.30931	4.5851							0.30931	0.7092	0.30931	0.7092
	0.30958	2.8809	0.30958	4.5897							0.30958	0.7107	0.30958	0.7108
	0.30986	2.8827	0.30986	4.5942							0.30986	0.7123	0.30986	0.7123
	0.31014	2.8845	0.31014	4.5987							0.31014	0.7138	0.31014	0.7138
	0.31042	2.8862	0.31042	4.6031							0.31042	0.7153	0.31042	0.7153
	0.31069	2.888	0.31069	4.6076							0.31069	0.7168	0.31069	0.7168
	0.31097	2.8897	0.31097	4.6121							0.31097	0.7184	0.31097	0.7184
	0.31125	2.8915	0.31125	4.6166							0.31125	0.7199	0.31125	0.7199
	0.31153	2.8932	0.31153	4.621							0.31153	0.7214	0.31153	0.7214
	0.31181	2.8949	0.31181	4.6255							0.31181	0.723	0.31181	0.723
	0.31208	2.8967	0.31208	4.6299							0.31208	0.7245	0.31208	0.7245
	0.31236	2.8984	0.31236	4.6343							0.31236	0.7261	0.31236	0.7261
	0.31264	2.9001	0.31264	4.6387							0.31264	0.7276	0.31264	0.7276
	0.31292	2.9018	0.31292	4.6432							0.31292	0.7292	0.31292	0.7292
	0.31319	2.9036	0.31319	4.6476							0.31319	0.7307	0.31319	0.7308
	0.31347	2.9053	0.31347	4.6519							0.31347	0.7323	0.31347	0.7323
	0.31375	2.907	0.31375	4.6563							0.31375	0.7339	0.31375	0.7339
	0.31403	2.9087	0.31403	4.6607							0.31403	0.7355	0.31403	0.7355
	0.31431	2.9104	0.31431	4.6651							0.31431	0.737	0.31431	0.737
	0.31458	2.9121	0.31458	4.6694							0.31458	0.7386	0.31458	0.7386
	0.31486	2.9138	0.31486	4.6738							0.31486	0.7402	0.31486	0.7402
	0.31514	2.9155	0.31514	4.6781							0.31514	0.7418	0.31514	0.7418
	0.31542	2.9172	0.31542	4.6825							0.31542	0.7434	0.31542	0.7434
	0.31569	2.9188	0.31569	4.6868							0.31569	0.745	0.31569	0.745
	0.31597	2.9205	0.31597	4.6911							0.31597	0.7466	0.31597	0.7466
	0.31625	2.9222	0.31625	4.6954							0.31625	0.7482	0.31625	0.7482
	0.31653	2.9239	0.31653	4.6997							0.31653	0.7498	0.31653	0.7498
	0.31681	2.9255	0.31681	4.704							0.31681	0.7514	0.31681	0.7514
	0.31708	2.9272	0.31708	4.7083							0.31708	0.753	0.31708	0.753
	0.31736	2.9288	0.31736	4.7125							0.31736	0.7546	0.31736	0.7546
	0.31764	2.9305	0.31764	4.7168							0.31764	0.7562	0.31764	0.7562
	0.31792	2.9322	0.31792	4.7211							0.31792	0.7579	0.31792	0.7579
	0.31819	2.9338	0.31819	4.7253							0.31819	0.7595	0.31819	0.7595
	0.31847	2.9354	0.31847	4.7295							0.31847	0.7611	0.31847	0.7611
	0.31875	2.9371	0.31875	4.7338							0.31875	0.7627	0.31875	0.7628
	0.31903	2.9387	0.31903	4.738							0.31903	0.7644	0.31903	0.7644
	0.31931	2.9404	0.31931	4.7422							0.31931	0.766	0.31931	0.766
	0.31958	2.942	0.31958	4.7464							0.31958	0.7677	0.31958	0.7677
	0.31986	2.9436	0.31986	4.7506							0.31986	0.7693	0.31986	0.7693
	0.32014	2.9452	0.32014	4.7548							0.32014	0.771	0.32014	0.771
	0.32042	2.9468	0.32042	4.759							0.32042	0.7726	0.32042	0.7726
	0.32069	2.9485	0.32069	4.7631							0.32069	0.7743	0.32069	0.7743
	0.32097	2.9501	0.32097	4.7673							0.32097	0.776	0.32097	0.776
	0.32125	2.9517	0.32125	4.7715							0.32125	0.7776	0.32125	0.7776
	0.32153	2.9533	0.32153	4.7756							0.32153	0.7793	0.32153	0.7793
	0.32181	2.9549	0.32181	4.7797							0.32181	0.781	0.32181	0.781
	0.32208	2.9565	0.32208	4.7839							0.32208	0.7827	0.32208	0.7827
	0.32236	2.9581	0.32236	4.788							0.32236	0.7844	0.32236	0.7844
	0.32264	2.9596	0.32264	4.7921							0.32264	0.7861	0.32264	0.7861
	0.32292	2.9612	0.32292	4.7962							0.32292	0.7877	0.32292	0.7878
	0.32319	2.9628	0.32319	4.8003							0.32319	0.7894	0.32319	0.7895
	0.32347	2.9644	0.32347	4.8044							0.32347	0.7911	0.32347	0.7912
	0.32375	2.966	0.32375	4.8085							0.32375	0.7929	0.32375	0.7929
	0.32403	2.9675	0.32403	4.8125							0.32403	0.7946	0.32403	0.7946
	0.32431	2.9691	0.32431	4.8166							0.32431	0.7963	0.32431	0.7963
	0.32458	2.9707	0.32458	4.8207							0.32458	0.798	0.32458	0.798
	0.32486	2.9722	0.32486	4.8247							0.32486	0.7997	0.32486	0.7997
	0.32514	2.9738	0.32514	4.8287							0.32514	0.8014	0.32514	0.8015
	0.32542	2.9753	0.32542	4.8328							0.32542	0.8032	0.32542	0.8032
	0.32569	2.9769	0.32569	4.8368							0.32569	0.8049	0.32569	0.8049
	0.32597	2.9784	0.32597	4.8408							0.32597	0.8066	0.32597	0.8067
	0.32625	2.98	0.32625	4.8448							0.32625	0.8084	0.32625	0.8084
	0.32653	2.9815	0.32653	4.8488							0.32653	0.8101	0.32653	0.8101
	0.32681	2.983	0.32681	4.8528							0.32681	0.8119	0.32681	0.8119
	0.32708	2.9846	0.32708	4.8568							0.32708	0.8136	0.32708	0.8136
	0.32736	2.9861	0.32736	4.8608							0.32736	0.8154	0.32736	0.8154
	0.32764	2.9876	0.32764	4.8647							0.32764	0.8172	0.32764	0.8172
	0.32792	2.9891	0.32792	4.8687							0.32792	0.8189	0.32792	0.8189
	0.32819	2.9906	0.32819	4.8726							0.32819	0.8207	0.32819	0.8207
	0.32847	2.9922	0.32847	4.8766							0.32847	0.8225	0.32847	0.8225
	0.32875	2.9937	0.32875	4.8805							0.32875	0.8243	0.32875	0.8243
	0.32903	2.9952	0.32903	4.8844							0.32903	0.826	0.32903	0.826
	0.32931	2.9967	0.32931	4.8883							0.32931	0.8278	0.32931	0.8278
	0.32958	2.9982	0.32958	4.8923							0.32958	0.8296	0.32958	0.8296
	0.32986	2.9997	0.32986	4.8962							0.32986	0.8314	0.32986	0.8314
	0.33014	3.0012	0.33014	4.9							0.33014	0.8332	0.33014	0.8332
	0.33042	3.0027	0.33042	4.9039							0.33042	0.835	0.33042	0.835
	0.33069	3.0041	0.33069	4.9078							0.33069	0.8368	0.33069	0.8368
	0.33097	3.0056	0.33097	4.9117							0.33097	0.8386	0.33097	0.8386
	0.33125	3.0071	0.33125	4.9155							0.33125	0.8404	0.33125	0.8405
	0.33153	3.0086	0.33153	4.9194							0.33153	0.8423	0.33153	0.8423
	0.33181	3.01	0.33181	4.9232							0.33181	0.8441	0.33181	0.8441
	0.33208	3.0115	0.33208	4.9271							0.33208	0.8459	0.33208	0.8459
	0.33236	3.013	0.33236	4.9309							0.33236	0.8477	0.33236	0.8478
	0.33264	3.0144	0.33264	4.9347							0.33264	0.8496	0.33264	0.8496
	0.33292	3.0159	0.33292	4.9386							0.33292	0.8514	0.33292	0.8514
	0.33319	3.0174	0.33319	4.9424							0.33319	0.8533	0.33319	0.8533
	0.33347	3.0188	0.33347	4.9462							0.33347	0.8551	0.33347	0.8551
	0.33375	3.0203	0.33375	4.9499							0.33375	0.857	0.33375	0.857
	0.33403	3.0217	0.33403	4.9537							0.33403	0.8588	0.33403	0.8588
	0.33431	3.0231	0.33431	4.9575							0.33431	0.8607	0.33431	0.8607
	0.33458	3.0246	0.33458	4.9613							0.33458	0.8626	0.33458	0.8626
	0.33486	3.026	0.33486	4.965							0.33486	0.8644	0.33486	0.8644
	0.33514	3.0274	0.33514	4.9688							0.33514	0.8663	0.33514	0.8663
	0.33542	3.0289	0.33542	4.9725							0.33542	0.8682	0.33542	0.8682
	0.33569	3.0303	0.33569	4.9763							0.33569	0.8701	0.33569	0.8701
	0.33597	3.0317	0.33597	4.98							0.33597	0.8719	0.33597	0.872
	0.33625	3.0331	0.33625	4.9837							0.33625	0.8738	0.33625	0.8738
	0.33653	3.0346	0.33653	4.9874							0.33653	0.8757	0.33653	0.8757
	0.33681	3.036	0.33681	4.9911							0.33681	0.8776	0.33681	0.8776
	0.33708	3.0374	0.33708	4.9949							0.33708	0.8795	0.33708	0.8795
	0.33736	3.0388	0.33736	4.9985							0.33736	0.8814	0.33736	0.8815
	0.33764	3.0402	0.33764	5.0022							0.33764	0.8834	0.33764	0.8834
	0.33792	3.0416	0.33792	5.0059							0.33792	0.8853	0.33792	0.8853
	0.33819	3.043	0.33819	5.0096							0.33819	0.8872	0.33819	0.8872
	0.33847	3.0444	0.33847	5.0132							0.33847	0.8891	0.33847	0.8891
	0.33875	3.0458	0.33875	5.0169							0.33875	0.8911	0.33875	0.8911
	0.33903	3.0471	0.33903	5.0205							0.33903	0.893	0.33903	0.893
	0.33931	3.0485	0.33931	5.0242							0.33931	0.8949	0.33931	0.8949
	0.33958	3.0499	0.33958	5.0278							0.33958	0.8969	0.33958	0.8969
	0.33986	3.0513	0.33986	5.0314							0.33986	0.8988	0.33986	0.8988
	0.34014	3.0527	0.34014	5.0351							0.34014	0.9008	0.34014	0.9008
	0.34042	3.054	0.34042	5.0387							0.34042	0.9027	0.34042	0.9027
	0.34069	3.0554	0.34069	5.0423							0.34069	0.9047	0.34069	0.9047
	0.34097	3.0568	0.34097	5.0459							0.34097	0.9066	0.34097	0.9066
	0.34125	3.0581	0.34125	5.0495							0.34125	0.9086	0.34125	0.9086
	0.34153	3.0595	0.34153	5.053							0.34153	0.9106	0.34153	0.9106
	0.34181	3.0608	0.34181	5.0566							0.34181	0.9126	0.34181	0.9126
	0.34208	3.0622	0.34208	5.0602							0.34208	0.9145	0.34208	0.9145
	0.34236	3.0635	0.34236	5.0637							0.34236	0.9165	0.34236	0.9165
	0.34264	3.0649	0.34264	5.0673							0.34264	0.9185	0.34264	0.9185
	0.34292	3.0662	0.34292	5.0708							0.34292	0.9205	0.34292	0.9205
	0.34319	3.0676	0.34319	5.0744							0.34319	0.9225	0.34319	0.9225
	0.34347	3.0689	0.34347	5.0779							0.34347	0.9245	0.34347	0.9245
	0.34375	3.0702	0.34375	5.0814							0.34375	0.9265	0.34375	0.9265
	0.34403	3.0716	0.34403	5.0849							0.34403	0.9285	0.34403	0.9285
	0.34431	3.0729	0.34431	5.0884							0.34431	0.9305	0.34431	0.9305
	0.34458	3.0742	0.34458	5.092							0.34458	0.9326	0.34458	0.9326
	0.34486	3.0755	0.34486	5.0955							0.34486	0.9346	0.34486	0.9346
	0.34514	3.0769	0.34514	5.0989							0.34514	0.9366	0.34514	0.9366
	0.34542	3.0782	0.34542	5.1024							0.34542	0.9386	0.34542	0.9386
	0.34569	3.0795	0.34569	5.1059							0.34569	0.9407	0.34569	0.9407
	0.34597	3.0808	0.34597	5.1094							0.34597	0.9427	0.34597	0.9427
	0.34625	3.0821	0.34625	5.1128							0.34625	0.9448	0.34625	0.9448
	0.34653	3.0834	0.34653	5.1163							0.34653	0.9468	0.34653	0.9468
	0.34681	3.0847	0.34681	5.1197							0.34681	0.9489	0.34681	0.9489
	0.34708	3.086	0.34708	5.1231							0.34708	0.9509	0.34708	0.9509
	0.34736	3.0873	0.34736	5.1266							0.34736	0.953	0.34736	0.953
	0.34764	3.0886	0.34764	5.13							0.34764	0.955	0.34764	0.9551
	0.34792	3.0899	0.34792	5.1334							0.34792	0.9571	0.34792	0.9571
	0.34819	3.0912	0.34819	5.1368							0.34819	0.9592	0.34819	0.9592
	0.34847	3.0924	0.34847	5.1402							0.34847	0.9613	0.34847	0.9613
	0.34875	3.0937	0.34875	5.1436							0.34875	0.9634	0.34875	0.9634
	0.34903	3.095	0.34903	5.147							0.34903	0.9654	0.34903	0.9654
	0.34931	3.0963	0.34931	5.1504							0.34931	0.9675	0.34931	0.9675
	0.34958	3.0975	0.34958	5.1538							0.34958	0.9696	0.34958	0.9696
	0.34986	3.0988	0.34986	5.1572							0.34986	0.9717	0.34986	0.9717
	0.35014	3.1001	0.35014	5.1605							0.35014	0.9738	0.35014	0.9738
	0.35042	3.1013	0.35042	5.1639							0.35042	0.9759	0.35042	0.9759
	0.35069	3.1026	0.35069	5.1672							0.35069	0.9781	0.35069	0.9781
	0.35097	3.1039	0.35097	5.1706							0.35097	0.9802	0.35097	0.9802
	0.35125	3.1051	0.35125	5.1739							0.35125	0.9823	0.35125	0.9823
	0.35153	3.1064	0.35153	5.1772							0.35153	0.9844	0.35153	0.9844
	0.35181	3.1076	0.35181	5.1805							0.35181	0.9865	0.35181	0.9866
	0.35208	3.1089	0.35208	5.1838							0.35208	0.9887	0.35208	0.9887
	0.35236	3.1101	0.35236	5.1872							0.35236	0.9908	0.35236	0.9908
	0.35264	3.1113	0.35264	5.1905							0.35264	0.993	0.35264	0.993
	0.35292	3.1126	0.35292	5.1938							0.35292	0.9951	0.35292	0.9951
	0.35319	3.1138	0.35319	5.197							0.35319	0.9973	0.35319	0.9973
	0.35347	3.115	0.35347	5.2003							0.35347	0.9994	0.35347	0.9994
	0.35375	3.1163	0.35375	5.2036							0.35375	1.0016	0.35375	1.0016
	0.35403	3.1175	0.35403	5.2069							0.35403	1.0037	0.35403	1.0037
	0.35431	3.1187	0.35431	5.2101							0.35431	1.0059	0.35431	1.0059
	0.35458	3.1199	0.35458	5.2134							0.35458	1.0081	0.35458	1.0081
	0.35486	3.1212	0.35486	5.2166							0.35486	1.0102	0.35486	1.0103
	0.35514	3.1224	0.35514	5.2199							0.35514	1.0124	0.35514	1.0124
	0.35542	3.1236	0.35542	5.2231							0.35542	1.0146	0.35542	1.0146
	0.35569	3.1248	0.35569	5.2263							0.35569	1.0168	0.35569	1.0168
	0.35597	3.126	0.35597	5.2296							0.35597	1.019	0.35597	1.019
	0.35625	3.1272	0.35625	5.2328							0.35625	1.0212	0.35625	1.0212
	0.35653	3.1284	0.35653	5.236							0.35653	1.0234	0.35653	1.0234
	0.35681	3.1296	0.35681	5.2392							0.35681	1.0256	0.35681	1.0256
	0.35708	3.1308	0.35708	5.2424							0.35708	1.0278	0.35708	1.0278
	0.35736	3.132	0.35736	5.2456							0.35736	1.03	0.35736	1.03
	0.35764	3.1332	0.35764	5.2487							0.35764	1.0322	0.35764	1.0322
	0.35792	3.1344	0.35792	5.2519							0.35792	1.0345	0.35792	1.0345
	0.35819	3.1356	0.35819	5.2551							0.35819	1.0367	0.35819	1.0367
	0.35847	3.1367	0.35847	5.2583							0.35847	1.0389	0.35847	1.0389
	0.35875	3.1379	0.35875	5.2614							0.35875	1.0411	0.35875	1.0412
	0.35903	3.1391	0.35903	5.2646							0.35903	1.0434	0.35903	1.0434
	0.35931	3.1403	0.35931	5.2677							0.35931	1.0456	0.35931	1.0456
	0.35958	3.1414	0.35958	5.2708							0.35958	1.0479	0.35958	1.0479
	0.35986	3.1426	0.35986	5.274							0.35986	1.0501	0.35986	1.0501
	0.36014	3.1438	0.36014	5.2771							0.36014	1.0524	0.36014	1.0524
	0.36042	3.1449	0.36042	5.2802							0.36042	1.0546	0.36042	1.0546
	0.36069	3.1461	0.36069	5.2833							0.36069	1.0569	0.36069	1.0569
	0.36097	3.1473	0.36097	5.2864							0.36097	1.0592	0.36097	1.0592
	0.36125	3.1484	0.36125	5.2895							0.36125	1.0614	0.36125	1.0614
	0.36153	3.1496	0.36153	5.2926							0.36153	1.0637	0.36153	1.0637
	0.36181	3.1507	0.36181	5.2957							0.36181	1.066	0.36181	1.066
	0.36208	3.1519	0.36208	5.2988							0.36208	1.0683	0.36208	1.0683
	0.36236	3.153	0.36236	5.3019							0.36236	1.0706	0.36236	1.0706
	0.36264	3.1542	0.36264	5.3049							0.36264	1.0729	0.36264	1.0729
	0.36292	3.1553	0.36292	5.308							0.36292	1.0751	0.36292	1.0752
	0.36319	3.1565	0.36319	5.3111							0.36319	1.0774	0.36319	1.0775
	0.36347	3.1576	0.36347	5.3141							0.36347	1.0798	0.36347	1.0798
	0.36375	3.1587	0.36375	5.3171							0.36375	1.0821	0.36375	1.0821
	0.36403	3.1599	0.36403	5.3202							0.36403	1.0844	0.36403	1.0844
	0.36431	3.161	0.36431	5.3232							0.36431	1.0867	0.36431	1.0867
	0.36458	3.1621	0.36458	5.3262							0.36458	1.089	0.36458	1.089
	0.36486	3.1632	0.36486	5.3293							0.36486	1.0913	0.36486	1.0913
	0.36514	3.1644	0.36514	5.3323							0.36514	1.0937	0.36514	1.0937
	0.36542	3.1655	0.36542	5.3353							0.36542	1.096	0.36542	1.096
	0.36569	3.1666	0.36569	5.3383							0.36569	1.0983	0.36569	1.0983
	0.36597	3.1677	0.36597	5.3413							0.36597	1.1007	0.36597	1.1007
	0.36625	3.1688	0.36625	5.3443							0.36625	1.103	0.36625	1.103
	0.36653	3.1699	0.36653	5.3473							0.36653	1.1054	0.36653	1.1054
	0.36681	3.171	0.36681	5.3502							0.36681	1.1077	0.36681	1.1077
	0.36708	3.1721	0.36708	5.3532							0.36708	1.1101	0.36708	1.1101
	0.36736	3.1732	0.36736	5.3562							0.36736	1.1124	0.36736	1.1124
	0.36764	3.1743	0.36764	5.3591							0.36764	1.1148	0.36764	1.1148
	0.36792	3.1754	0.36792	5.3621							0.36792	1.1172	0.36792	1.1172
	0.36819	3.1765	0.36819	5.365							0.36819	1.1195	0.36819	1.1195
	0.36847	3.1776	0.36847	5.368							0.36847	1.1219	0.36847	1.1219
	0.36875	3.1787	0.36875	5.3709							0.36875	1.1243	0.36875	1.1243
	0.36903	3.1798	0.36903	5.3738							0.36903	1.1267	0.36903	1.1267
	0.36931	3.1809	0.36931	5.3768							0.36931	1.1291	0.36931	1.1291
	0.36958	3.182	0.36958	5.3797							0.36958	1.1314	0.36958	1.1314
	0.36986	3.183	0.36986	5.3826							0.36986	1.1338	0.36986	1.1338
	0.37014	3.1841	0.37014	5.3855							0.37014	1.1362	0.37014	1.1362
	0.37042	3.1852	0.37042	5.3884							0.37042	1.1386	0.37042	1.1386
	0.37069	3.1863	0.37069	5.3913							0.37069	1.141	0.37069	1.1411
	0.37097	3.1873	0.37097	5.3942							0.37097	1.1435	0.37097	1.1435
	0.37125	3.1884	0.37125	5.3971							0.37125	1.1459	0.37125	1.1459
	0.37153	3.1895	0.37153	5.3999							0.37153	1.1483	0.37153	1.1483
	0.37181	3.1905	0.37181	5.4028							0.37181	1.1507	0.37181	1.1507
	0.37208	3.1916	0.37208	5.4057							0.37208	1.1531	0.37208	1.1531
	0.37236	3.1927	0.37236	5.4085							0.37236	1.1556	0.37236	1.1556
	0.37264	3.1937	0.37264	5.4114							0.37264	1.158	0.37264	1.158
	0.37292	3.1948	0.37292	5.4142							0.37292	1.1604	0.37292	1.1604
	0.37319	3.1958	0.37319	5.4171							0.37319	1.1629	0.37319	1.1629
	0.37347	3.1969	0.37347	5.4199							0.37347	1.1653	0.37347	1.1653
	0.37375	3.1979	0.37375	5.4228							0.37375	1.1678	0.37375	1.1678
	0.37403	3.199	0.37403	5.4256							0.37403	1.1702	0.37403	1.1702
	0.37431	3.2	0.37431	5.4284							0.37431	1.1727	0.37431	1.1727
	0.37458	3.201	0.37458	5.4312							0.37458	1.1751	0.37458	1.1751
	0.37486	3.2021	0.37486	5.434							0.37486	1.1776	0.37486	1.1776
	0.37514	3.2031	0.37514	5.4368							0.37514	1.1801	0.37514	1.1801
	0.37542	3.2042	0.37542	5.4396							0.37542	1.1825	0.37542	1.1825
	0.37569	3.2052	0.37569	5.4424							0.37569	1.185	0.37569	1.185
	0.37597	3.2062	0.37597	5.4452							0.37597	1.1875	0.37597	1.1875
	0.37625	3.2072	0.37625	5.448							0.37625	1.19	0.37625	1.19
	0.37653	3.2083	0.37653	5.4508							0.37653	1.1925	0.37653	1.1925
	0.37681	3.2093	0.37681	5.4535							0.37681	1.1949	0.37681	1.195
	0.37708	3.2103	0.37708	5.4563							0.37708	1.1974	0.37708	1.1975
	0.37736	3.2113	0.37736	5.4591							0.37736	1.1999	0.37736	1.1999
	0.37764	3.2123	0.37764	5.4618							0.37764	1.2024	0.37764	1.2024
	0.37792	3.2134	0.37792	5.4646							0.37792	1.2049	0.37792	1.205
	0.37819	3.2144	0.37819	5.4673							0.37819	1.2075	0.37819	1.2075
	0.37847	3.2154	0.37847	5.4701							0.37847	1.21	0.37847	1.21
	0.37875	3.2164	0.37875	5.4728							0.37875	1.2125	0.37875	1.2125
	0.37903	3.2174	0.37903	5.4755							0.37903	1.215	0.37903	1.215
	0.37931	3.2184	0.37931	5.4782							0.37931	1.2175	0.37931	1.2175
	0.37958	3.2194	0.37958	5.481							0.37958	1.22	0.37958	1.2201
	0.37986	3.2204	0.37986	5.4837							0.37986	1.2226	0.37986	1.2226
	0.38014	3.2214	0.38014	5.4864							0.38014	1.2251	0.38014	1.2251
	0.38042	3.2224	0.38042	5.4891							0.38042	1.2276	0.38042	1.2276
	0.38069	3.2234	0.38069	5.4918							0.38069	1.2302	0.38069	1.2302
	0.38097	3.2244	0.38097	5.4945							0.38097	1.2327	0.38097	1.2327
	0.38125	3.2254	0.38125	5.4972							0.38125	1.2353	0.38125	1.2353
	0.38153	3.2263	0.38153	5.4998							0.38153	1.2378	0.38153	1.2378
	0.38181	3.2273	0.38181	5.5025							0.38181	1.2404	0.38181	1.2404
	0.38208	3.2283	0.38208	5.5052							0.38208	1.2429	0.38208	1.2429
	0.38236	3.2293	0.38236	5.5078							0.38236	1.2455	0.38236	1.2455
	0.38264	3.2303	0.38264	5.5105							0.38264	1.2481	0.38264	1.2481
	0.38292	3.2312	0.38292	5.5132							0.38292	1.2506	0.38292	1.2506
	0.38319	3.2322	0.38319	5.5158							0.38319	1.2532	0.38319	1.2532
	0.38347	3.2332	0.38347	5.5184							0.38347	1.2558	0.38347	1.2558
	0.38375	3.2342	0.38375	5.5211							0.38375	1.2583	0.38375	1.2584
	0.38403	3.2351	0.38403	5.5237							0.38403	1.2609	0.38403	1.2609
	0.38431	3.2361	0.38431	5.5263							0.38431	1.2635	0.38431	1.2635
	0.38458	3.2371	0.38458	5.529							0.38458	1.2661	0.38458	1.2661
	0.38486	3.238	0.38486	5.5316							0.38486	1.2687	0.38486	1.2687
	0.38514	3.239	0.38514	5.5342							0.38514	1.2713	0.38514	1.2713
	0.38542	3.2399	0.38542	5.5368							0.38542	1.2739	0.38542	1.2739
	0.38569	3.2409	0.38569	5.5394							0.38569	1.2765	0.38569	1.2765
	0.38597	3.2418	0.38597	5.542							0.38597	1.2791	0.38597	1.2791
	0.38625	3.2428	0.38625	5.5446							0.38625	1.2817	0.38625	1.2817
	0.38653	3.2437	0.38653	5.5472							0.38653	1.2843	0.38653	1.2843
	0.38681	3.2447	0.38681	5.5498							0.38681	1.2869	0.38681	1.2869
	0.38708	3.2456	0.38708	5.5523							0.38708	1.2895	0.38708	1.2896
	0.38736	3.2466	0.38736	5.5549							0.38736	1.2922	0.38736	1.2922
	0.38764	3.2475	0.38764	5.5575							0.38764	1.2948	0.38764	1.2948
	0.38792	3.2485	0.38792	5.5601							0.38792	1.2974	0.38792	1.2974
	0.38819	3.2494	0.38819	5.5626							0.38819	1.3	0.38819	1.3001
	0.38847	3.2503	0.38847	5.5652							0.38847	1.3027	0.38847	1.3027
	0.38875	3.2513	0.38875	5.5677							0.38875	1.3053	0.38875	1.3053
	0.38903	3.2522	0.38903	5.5703							0.38903	1.308	0.38903	1.308
	0.38931	3.2531	0.38931	5.5728							0.38931	1.3106	0.38931	1.3106
	0.38958	3.2541	0.38958	5.5753							0.38958	1.3133	0.38958	1.3133
	0.38986	3.255	0.38986	5.5778							0.38986	1.3159	0.38986	1.3159
	0.39014	3.2559	0.39014	5.5804							0.39014	1.3186	0.39014	1.3186
	0.39042	3.2568	0.39042	5.5829							0.39042	1.3212	0.39042	1.3212
	0.39069	3.2577	0.39069	5.5854							0.39069	1.3239	0.39069	1.3239
	0.39097	3.2587	0.39097	5.5879							0.39097	1.3265	0.39097	1.3265
	0.39125	3.2596	0.39125	5.5904							0.39125	1.3292	0.39125	1.3292
	0.39153	3.2605	0.39153	5.5929							0.39153	1.3319	0.39153	1.3319
	0.39181	3.2614	0.39181	5.5954							0.39181	1.3345	0.39181	1.3345
	0.39208	3.2623	0.39208	5.5979							0.39208	1.3372	0.39208	1.3372
	0.39236	3.2632	0.39236	5.6004							0.39236	1.3399	0.39236	1.3399
	0.39264	3.2641	0.39264	5.6029							0.39264	1.3426	0.39264	1.3426
	0.39292	3.265	0.39292	5.6054							0.39292	1.3453	0.39292	1.3453
	0.39319	3.2659	0.39319	5.6078							0.39319	1.3479	0.39319	1.3479
	0.39347	3.2668	0.39347	5.6103							0.39347	1.3506	0.39347	1.3506
	0.39375	3.2677	0.39375	5.6127							0.39375	1.3533	0.39375	1.3533
	0.39403	3.2686	0.39403	5.6152							0.39403	1.356	0.39403	1.356
	0.39431	3.2695	0.39431	5.6177							0.39431	1.3587	0.39431	1.3587
	0.39458	3.2704	0.39458	5.6201							0.39458	1.3614	0.39458	1.3614
	0.39486	3.2713	0.39486	5.6226							0.39486	1.3641	0.39486	1.3641
	0.39514	3.2722	0.39514	5.625							0.39514	1.3668	0.39514	1.3668
	0.39542	3.2731	0.39542	5.6274							0.39542	1.3695	0.39542	1.3695
	0.39569	3.274	0.39569	5.6299							0.39569	1.3722	0.39569	1.3723
	0.39597	3.2749	0.39597	5.6323							0.39597	1.375	0.39597	1.375
	0.39625	3.2757	0.39625	5.6347							0.39625	1.3777	0.39625	1.3777
	0.39653	3.2766	0.39653	5.6371							0.39653	1.3804	0.39653	1.3804
	0.39681	3.2775	0.39681	5.6395							0.39681	1.3831	0.39681	1.3831
	0.39708	3.2784	0.39708	5.6419							0.39708	1.3859	0.39708	1.3859
	0.39736	3.2793	0.39736	5.6443							0.39736	1.3886	0.39736	1.3886
	0.39764	3.2801	0.39764	5.6467							0.39764	1.3913	0.39764	1.3913
	0.39792	3.281	0.39792	5.6491							0.39792	1.394	0.39792	1.3941
	0.39819	3.2819	0.39819	5.6515							0.39819	1.3968	0.39819	1.3968
	0.39847	3.2827	0.39847	5.6539							0.39847	1.3995	0.39847	1.4019
	0.39875	3.2836	0.39875	5.6563							0.39875	1.4023	0.39875	1.4073
	0.39903	3.2845	0.39903	5.6586							0.39903	1.405	0.39903	1.4127
	0.39931	3.2853	0.39931	5.661							0.39931	1.4077	0.39931	1.4181
	0.39958	3.2862	0.39958	5.6634							0.39958	1.4105	0.39958	1.4236
	0.39986	3.2871	0.39986	5.6657							0.39986	1.4132	0.39986	1.429
	0.40014	3.2879	0.40014	5.6681							0.40014	1.416	0.40014	1.4344
	0.40042	3.2888	0.40042	5.6705							0.40042	1.4187	0.40042	1.4398
	0.40069	3.2896	0.40069	5.6728							0.40069	1.4214	0.40069	1.4453
	0.40097	3.2905	0.40097	5.6751							0.40097	1.4242	0.40097	1.4507
	0.40125	3.2913	0.40125	5.6775							0.40125	1.4269	0.40125	1.4562
	0.40153	3.2922	0.40153	5.6798							0.40153	1.4297	0.40153	1.4616
	0.40181	3.293	0.40181	5.6822							0.40181	1.4324	0.40181	1.467
	0.40208	3.2939	0.40208	5.6845							0.40208	1.4351	0.40208	1.4725
	0.40236	3.2947	0.40236	5.6868							0.40236	1.4379	0.40236	1.4779
	0.40264	3.2956	0.40264	5.6891							0.40264	1.4406	0.40264	1.4834
	0.40292	3.2964	0.40292	5.6914							0.40292	1.4433	0.40292	1.4889
	0.40319	3.2972	0.40319	5.6937							0.40319	1.4461	0.40319	1.4943
	0.40347	3.2981	0.40347	5.696							0.40347	1.4488	0.40347	1.4998
	0.40375	3.2989	0.40375	5.6983							0.40375	1.4516	0.40375	1.5052
	0.40403	3.2997	0.40403	5.7006							0.40403	1.4543	0.40403	1.5107
	0.40431	3.3006	0.40431	5.7029							0.40431	1.457	0.40431	1.5162
	0.40458	3.3014	0.40458	5.7052							0.40458	1.4598	0.40458	1.5217
	0.40486	3.3022	0.40486	5.7075							0.40486	1.4625	0.40486	1.5271
	0.40514	3.3031	0.40514	5.7098							0.40514	1.4652	0.40514	1.5326
	0.40542	3.3039	0.40542	5.7121							0.40542	1.468	0.40542	1.5381
	0.40569	3.3047	0.40569	5.7143							0.40569	1.4707	0.40569	1.5436
	0.40597	3.3055	0.40597	5.7166							0.40597	1.4734	0.40597	1.5491
	0.40625	3.3064	0.40625	5.7189							0.40625	1.4762	0.40625	1.5546
	0.40653	3.3072	0.40653	5.7211							0.40653	1.4789	0.40653	1.5601
	0.40681	3.308	0.40681	5.7234							0.40681	1.4817	0.40681	1.5656
	0.40708	3.3088	0.40708	5.7256							0.40708	1.4844	0.40708	1.5711
	0.40736	3.3096	0.40736	5.7279							0.40736	1.4871	0.40736	1.5766
	0.40764	3.3104	0.40764	5.7301							0.40764	1.4899	0.40764	1.5821
	0.40792	3.3112	0.40792	5.7323							0.40792	1.4926	0.40792	1.5876
	0.40819	3.3121	0.40819	5.7346							0.40819	1.4953	0.40819	1.5931
	0.40847	3.3129	0.40847	5.7368							0.40847	1.498	0.40847	1.5986
	0.40875	3.3137	0.40875	5.739							0.40875	1.5008	0.40875	1.6041
	0.40903	3.3145	0.40903	5.7413							0.40903	1.5035	0.40903	1.6096
	0.40931	3.3153	0.40931	5.7435							0.40931	1.5062	0.40931	1.6151
	0.40958	3.3161	0.40958	5.7457							0.40958	1.509	0.40958	1.6207
	0.40986	3.3169	0.40986	5.7479							0.40986	1.5117	0.40986	1.6262
	0.41014	3.3177	0.41014	5.7501							0.41014	1.5144	0.41014	1.6317
	0.41042	3.3185	0.41042	5.7523							0.41042	1.5172	0.41042	1.6372
	0.41069	3.3193	0.41069	5.7545							0.41069	1.5199	0.41069	1.6428
	0.41097	3.3201	0.41097	5.7567							0.41097	1.5226	0.41097	1.6483
	0.41125	3.3209	0.41125	5.7589							0.41125	1.5253	0.41125	1.6538
	0.41153	3.3216	0.41153	5.7611							0.41153	1.5281	0.41153	1.6594
	0.41181	3.3224	0.41181	5.7632							0.41181	1.5308	0.41181	1.6649
	0.41208	3.3232	0.41208	5.7654							0.41208	1.5335	0.41208	1.6704
	0.41236	3.324	0.41236	5.7676							0.41236	1.5362	0.41236	1.676
	0.41264	3.3248	0.41264	5.7698							0.41264	1.539	0.41264	1.6815
	0.41292	3.3256	0.41292	5.7719							0.41292	1.5417	0.41292	1.6871
	0.41319	3.3264	0.41319	5.7741							0.41319	1.5444	0.41319	1.6926
	0.41347	3.3271	0.41347	5.7763							0.41347	1.5471	0.41347	1.6982
	0.41375	3.3279	0.41375	5.7784							0.41375	1.5498	0.41375	1.7037
	0.41403	3.3287	0.41403	5.7806							0.41403	1.5526	0.41403	1.7093
	0.41431	3.3295	0.41431	5.7827							0.41431	1.5553	0.41431	1.7148
	0.41458	3.3302	0.41458	5.7848							0.41458	1.558	0.41458	1.7204
	0.41486	3.331	0.41486	5.787							0.41486	1.5607	0.41486	1.7259
	0.41514	3.3318	0.41514	5.7891							0.41514	1.5634	0.41514	1.7315
	0.41542	3.3326	0.41542	5.7912							0.41542	1.5662	0.41542	1.7371
	0.41569	3.3333	0.41569	5.7934							0.41569	1.5689	0.41569	1.7426
	0.41597	3.3341	0.41597	5.7955							0.41597	1.5716	0.41597	1.7482
	0.41625	3.3349	0.41625	5.7976							0.41625	1.5743	0.41625	1.7538
	0.41653	3.3356	0.41653	5.7997							0.41653	1.577	0.41653	1.7593
	0.41681	3.3364	0.41681	5.8018							0.41681	1.5797	0.41681	1.7649
	0.41708	3.3371	0.41708	5.804							0.41708	1.5824	0.41708	1.7705
	0.41736	3.3379	0.41736	5.8061							0.41736	1.5852	0.41736	1.776
	0.41764	3.3387	0.41764	5.8082							0.41764	1.5879	0.41764	1.7816
	0.41792	3.3394	0.41792	5.8103							0.41792	1.5906	0.41792	1.7872
	0.41819	3.3402	0.41819	5.8123							0.41819	1.5933	0.41819	1.7928
	0.41847	3.3409	0.41847	5.8144							0.41847	1.596	0.41847	1.7983
	0.41875	3.3417	0.41875	5.8165							0.41875	1.5987	0.41875	1.8039
	0.41903	3.3424	0.41903	5.8186							0.41903	1.6014	0.41903	1.8095
	0.41931	3.3432	0.41931	5.8207							0.41931	1.6041	0.41931	1.8151
	0.41958	3.3439	0.41958	5.8228							0.41958	1.6068	0.41958	1.8207
	0.41986	3.3447	0.41986	5.8248							0.41986	1.6095	0.41986	1.8263
	0.42014	3.3454	0.42014	5.8269							0.42014	1.6122	0.42014	1.8319
	0.42042	3.3462	0.42042	5.829							0.42042	1.6149	0.42042	1.8374
	0.42069	3.3469	0.42069	5.831							0.42069	1.6176	0.42069	1.843
	0.42097	3.3476	0.42097	5.8331							0.42097	1.6203	0.42097	1.8486
	0.42125	3.3484	0.42125	5.8351							0.42125	1.623	0.42125	1.8542
	0.42153	3.3491	0.42153	5.8372							0.42153	1.6257	0.42153	1.8598
	0.42181	3.3498	0.42181	5.8392							0.42181	1.6284	0.42181	1.8654
	0.42208	3.3506	0.42208	5.8413							0.42208	1.6311	0.42208	1.871
	0.42236	3.3513	0.42236	5.8433							0.42236	1.6338	0.42236	1.8766
	0.42264	3.352	0.42264	5.8453							0.42264	1.6365	0.42264	1.8822
	0.42292	3.3528	0.42292	5.8474							0.42292	1.6392	0.42292	1.8878
	0.42319	3.3535	0.42319	5.8494							0.42319	1.6419	0.42319	1.8934
	0.42347	3.3542	0.42347	5.8514							0.42347	1.6446	0.42347	1.899
	0.42375	3.355	0.42375	5.8535							0.42375	1.6473	0.42375	1.9046
	0.42403	3.3557	0.42403	5.8555							0.42403	1.6499	0.42403	1.9102
	0.42431	3.3564	0.42431	5.8575							0.42431	1.6526	0.42431	1.9158
	0.42458	3.3571	0.42458	5.8595							0.42458	1.6553	0.42458	1.9214
	0.42486	3.3579	0.42486	5.8615							0.42486	1.658	0.42486	1.927
	0.42514	3.3586	0.42514	5.8635							0.42514	1.6607	0.42514	1.9326
	0.42542	3.3593	0.42542	5.8655							0.42542	1.6634	0.42542	1.9382
	0.42569	3.36	0.42569	5.8675							0.42569	1.666	0.42569	1.9438
	0.42597	3.3607	0.42597	5.8695							0.42597	1.6687	0.42597	1.9494
	0.42625	3.3614	0.42625	5.8715							0.42625	1.6714	0.42625	1.955
	0.42653	3.3622	0.42653	5.8735							0.42653	1.6741	0.42653	1.9607
	0.42681	3.3629	0.42681	5.8754							0.42681	1.6768	0.42681	1.9663
	0.42708	3.3636	0.42708	5.8774							0.42708	1.6794	0.42708	1.9719
	0.42736	3.3643	0.42736	5.8794							0.42736	1.6821	0.42736	1.9775
	0.42764	3.365	0.42764	5.8814							0.42764	1.6848	0.42764	1.9831
	0.42792	3.3657	0.42792	5.8833							0.42792	1.6875	0.42792	1.9887
	0.42819	3.3664	0.42819	5.8853							0.42819	1.6901	0.42819	1.9943
	0.42847	3.3671	0.42847	5.8873							0.42847	1.6928	0.42847	1.9999
	0.42875	3.3678	0.42875	5.8892							0.42875	1.6955	0.42875	2.0055
	0.42903	3.3685	0.42903	5.8912							0.42903	1.6981	0.42903	2.0112
	0.42931	3.3692	0.42931	5.8931							0.42931	1.7008	0.42931	2.0168
	0.42958	3.3699	0.42958	5.8951							0.42958	1.7034	0.42958	2.0224
	0.42986	3.3706	0.42986	5.897							0.42986	1.7061	0.42986	2.028
	0.43014	3.3713	0.43014	5.899							0.43014	1.7088	0.43014	2.0336
	0.43042	3.372	0.43042	5.9009							0.43042	1.7114	0.43042	2.0392
	0.43069	3.3727	0.43069	5.9029							0.43069	1.7141	0.43069	2.0448
	0.43097	3.3734	0.43097	5.9048							0.43097	1.7167	0.43097	2.0505
	0.43125	3.3741	0.43125	5.9067							0.43125	1.7194	0.43125	2.0561
	0.43153	3.3748	0.43153	5.9086							0.43153	1.722	0.43153	2.0617
	0.43181	3.3755	0.43181	5.9106							0.43181	1.7247	0.43181	2.0673
	0.43208	3.3761	0.43208	5.9125							0.43208	1.7274	0.43208	2.0729
	0.43236	3.3768	0.43236	5.9144							0.43236	1.73	0.43236	2.0785
	0.43264	3.3775	0.43264	5.9163							0.43264	1.7326	0.43264	2.0841
	0.43292	3.3782	0.43292	5.9182							0.43292	1.7353	0.43292	2.0898
	0.43319	3.3789	0.43319	5.9201							0.43319	1.7379	0.43319	2.0954
	0.43347	3.3796	0.43347	5.922							0.43347	1.7406	0.43347	2.101
	0.43375	3.3802	0.43375	5.9239							0.43375	1.7432	0.43375	2.1066
	0.43403	3.3809	0.43403	5.9258							0.43403	1.7459	0.43403	2.1122
	0.43431	3.3816	0.43431	5.9277							0.43431	1.7485	0.43431	2.1178
	0.43458	3.3823	0.43458	5.9296							0.43458	1.7511	0.43458	2.1235
	0.43486	3.383	0.43486	5.9315							0.43486	1.7538	0.43486	2.1291
	0.43514	3.3836	0.43514	5.9334							0.43514	1.7564	0.43514	2.1347
	0.43542	3.3843	0.43542	5.9353							0.43542	1.759	0.43542	2.1403
	0.43569	3.385	0.43569	5.9371							0.43569	1.7617	0.43569	2.1459
	0.43597	3.3856	0.43597	5.939							0.43597	1.7643	0.43597	2.1515
	0.43625	3.3863	0.43625	5.9409							0.43625	1.7669	0.43625	2.1571
	0.43653	3.387	0.43653	5.9428							0.43653	1.7695	0.43653	2.1628
	0.43681	3.3876	0.43681	5.9446							0.43681	1.7722	0.43681	2.1684
	0.43708	3.3883	0.43708	5.9465							0.43708	1.7748	0.43708	2.174
	0.43736	3.389	0.43736	5.9483							0.43736	1.7774	0.43736	2.1796
	0.43764	3.3896	0.43764	5.9502							0.43764	1.78	0.43764	2.1852
	0.43792	3.3903	0.43792	5.952							0.43792	1.7826	0.43792	2.1908
	0.43819	3.391	0.43819	5.9539							0.43819	1.7853	0.43819	2.1964
	0.43847	3.3916	0.43847	5.9557							0.43847	1.7879	0.43847	2.202
	0.43875	3.3923	0.43875	5.9576							0.43875	1.7905	0.43875	2.2076
	0.43903	3.3929	0.43903	5.9594							0.43903	1.7931	0.43903	2.2132
	0.43931	3.3936	0.43931	5.9613							0.43931	1.7957	0.43931	2.2188
	0.43958	3.3943	0.43958	5.9631							0.43958	1.7983	0.43958	2.2245
	0.43986	3.3949	0.43986	5.9649							0.43986	1.8009	0.43986	2.2301
	0.44014	3.3956	0.44014	5.9668							0.44014	1.8035	0.44014	2.2357
	0.44042	3.3962	0.44042	5.9686							0.44042	1.8061	0.44042	2.2413
	0.44069	3.3969	0.44069	5.9704							0.44069	1.8087	0.44069	2.2469
	0.44097	3.3975	0.44097	5.9722							0.44097	1.8113	0.44097	2.2525
	0.44125	3.3982	0.44125	5.9741							0.44125	1.8139	0.44125	2.2581
	0.44153	3.3988	0.44153	5.9759							0.44153	1.8165	0.44153	2.2637
	0.44181	3.3995	0.44181	5.9777							0.44181	1.8191	0.44181	2.2693
	0.44208	3.4001	0.44208	5.9795							0.44208	1.8217	0.44208	2.2749
	0.44236	3.4007	0.44236	5.9813							0.44236	1.8243	0.44236	2.2805
	0.44264	3.4014	0.44264	5.9831							0.44264	1.8269	0.44264	2.2861
	0.44292	3.402	0.44292	5.9849							0.44292	1.8294	0.44292	2.2917
	0.44319	3.4027	0.44319	5.9867							0.44319	1.832	0.44319	2.2972
	0.44347	3.4033	0.44347	5.9885							0.44347	1.8346	0.44347	2.3028
	0.44375	3.4039	0.44375	5.9903							0.44375	1.8372	0.44375	2.3084
	0.44403	3.4046	0.44403	5.9921							0.44403	1.8398	0.44403	2.314
	0.44431	3.4052	0.44431	5.9938							0.44431	1.8423	0.44431	2.3196
	0.44458	3.4059	0.44458	5.9956							0.44458	1.8449	0.44458	2.3252
	0.44486	3.4065	0.44486	5.9974							0.44486	1.8475	0.44486	2.3308
	0.44514	3.4071	0.44514	5.9992							0.44514	1.85	0.44514	2.3364
	0.44542	3.4078	0.44542	6.001							0.44542	1.8526	0.44542	2.342
	0.44569	3.4084	0.44569	6.0027							0.44569	1.8552	0.44569	2.3475
	0.44597	3.409	0.44597	6.0045							0.44597	1.8577	0.44597	2.3531
	0.44625	3.4096	0.44625	6.0063							0.44625	1.8603	0.44625	2.3587
	0.44653	3.4103	0.44653	6.008							0.44653	1.8628	0.44653	2.3643
	0.44681	3.4109	0.44681	6.0098							0.44681	1.8654	0.44681	2.3699
	0.44708	3.4115	0.44708	6.0115							0.44708	1.868	0.44708	2.3754
	0.44736	3.4121	0.44736	6.0133							0.44736	1.8705	0.44736	2.381
	0.44764	3.4128	0.44764	6.015							0.44764	1.8731	0.44764	2.3866
	0.44792	3.4134	0.44792	6.0168							0.44792	1.8756	0.44792	2.3921
	0.44819	3.414	0.44819	6.0185							0.44819	1.8782	0.44819	2.3977
	0.44847	3.4146	0.44847	6.0203							0.44847	1.8807	0.44847	2.4033
	0.44875	3.4152	0.44875	6.022							0.44875	1.8832	0.44875	2.4088
	0.44903	3.4159	0.44903	6.0238							0.44903	1.8858	0.44903	2.4144
	0.44931	3.4165	0.44931	6.0255							0.44931	1.8883	0.44931	2.42
	0.44958	3.4171	0.44958	6.0272							0.44958	1.8909	0.44958	2.4255
	0.44986	3.4177	0.44986	6.0289							0.44986	1.8934	0.44986	2.4311
	0.45014	3.4183	0.45014	6.0307							0.45014	1.8959	0.45014	2.4367
	0.45042	3.4189	0.45042	6.0324							0.45042	1.8984	0.45042	2.4422
	0.45069	3.4195	0.45069	6.0341							0.45069	1.901	0.45069	2.4478
	0.45097	3.4202	0.45097	6.0358							0.45097	1.9035	0.45097	2.4533
	0.45125	3.4208	0.45125	6.0375							0.45125	1.906	0.45125	2.4589
	0.45153	3.4214	0.45153	6.0393							0.45153	1.9085	0.45153	2.4644
	0.45181	3.422	0.45181	6.041							0.45181	1.9111	0.45181	2.47
	0.45208	3.4226	0.45208	6.0427							0.45208	1.9136	0.45208	2.4755
	0.45236	3.4232	0.45236	6.0444							0.45236	1.9161	0.45236	2.481
	0.45264	3.4238	0.45264	6.0461							0.45264	1.9186	0.45264	2.4866
	0.45292	3.4244	0.45292	6.0478							0.45292	1.9211	0.45292	2.4921
	0.45319	3.425	0.45319	6.0495							0.45319	1.9236	0.45319	2.4977
	0.45347	3.4256	0.45347	6.0512							0.45347	1.9261	0.45347	2.5032
	0.45375	3.4262	0.45375	6.0529							0.45375	1.9286	0.45375	2.5087
	0.45403	3.4268	0.45403	6.0546							0.45403	1.9311	0.45403	2.5142
	0.45431	3.4274	0.45431	6.0562							0.45431	1.9336	0.45431	2.5198
	0.45458	3.428	0.45458	6.0579							0.45458	1.9361	0.45458	2.5253
	0.45486	3.4286	0.45486	6.0596							0.45486	1.9386	0.45486	2.5308
	0.45514	3.4292	0.45514	6.0613							0.45514	1.9411	0.45514	2.5363
	0.45542	3.4298	0.45542	6.063							0.45542	1.9436	0.45542	2.5418
	0.45569	3.4304	0.45569	6.0646							0.45569	1.9461	0.45569	2.5474
	0.45597	3.431	0.45597	6.0663							0.45597	1.9485	0.45597	2.5529
	0.45625	3.4316	0.45625	6.068							0.45625	1.951	0.45625	2.5584
	0.45653	3.4322	0.45653	6.0696							0.45653	1.9535	0.45653	2.5639
	0.45681	3.4327	0.45681	6.0713							0.45681	1.956	0.45681	2.5694
	0.45708	3.4333	0.45708	6.073							0.45708	1.9585	0.45708	2.5749
	0.45736	3.4339	0.45736	6.0746							0.45736	1.9609	0.45736	2.5804
	0.45764	3.4345	0.45764	6.0763							0.45764	1.9634	0.45764	2.5859
	0.45792	3.4351	0.45792	6.0779							0.45792	1.9659	0.45792	2.5914
	0.45819	3.4357	0.45819	6.0796							0.45819	1.9683	0.45819	2.5969
	0.45847	3.4363	0.45847	6.0812							0.45847	1.9708	0.45847	2.6024
	0.45875	3.4368	0.45875	6.0829							0.45875	1.9732	0.45875	2.6079
	0.45903	3.4374	0.45903	6.0845							0.45903	1.9757	0.45903	2.6134
	0.45931	3.438	0.45931	6.0862							0.45931	1.9782	0.45931	2.6188
	0.45958	3.4386	0.45958	6.0878							0.45958	1.9806	0.45958	2.6243
	0.45986	3.4392	0.45986	6.0894							0.45986	1.9831	0.45986	2.6298
	0.46014	3.4397	0.46014	6.0911							0.46014	1.9855	0.46014	2.6353
	0.46042	3.4403	0.46042	6.0927							0.46042	1.988	0.46042	2.6407
	0.46069	3.4409	0.46069	6.0943							0.46069	1.9904	0.46069	2.6462
	0.46097	3.4415	0.46097	6.0959							0.46097	1.9928	0.46097	2.6517
	0.46125	3.4421	0.46125	6.0976							0.46125	1.9953	0.46125	2.6571
	0.46153	3.4426	0.46153	6.0992							0.46153	1.9977	0.46153	2.6626
	0.46181	3.4432	0.46181	6.1008							0.46181	2.0001	0.46181	2.668
	0.46208	3.4438	0.46208	6.1024							0.46208	2.0026	0.46208	2.6735
	0.46236	3.4443	0.46236	6.104							0.46236	2.005	0.46236	2.6789
	0.46264	3.4449	0.46264	6.1056							0.46264	2.0074	0.46264	2.6844
	0.46292	3.4455	0.46292	6.1072							0.46292	2.0098	0.46292	2.6898
	0.46319	3.446	0.46319	6.1089							0.46319	2.0123	0.46319	2.6953
	0.46347	3.4466	0.46347	6.1105							0.46347	2.0147	0.46347	2.7007
	0.46375	3.4472	0.46375	6.1121							0.46375	2.0171	0.46375	2.7062
	0.46403	3.4477	0.46403	6.1137							0.46403	2.0195	0.46403	2.7116
	0.46431	3.4483	0.46431	6.1153							0.46431	2.0219	0.46431	2.717
	0.46458	3.4489	0.46458	6.1168							0.46458	2.0243	0.46458	2.7224
	0.46486	3.4494	0.46486	6.1184							0.46486	2.0267	0.46486	2.7279
	0.46514	3.45	0.46514	6.12							0.46514	2.0291	0.46514	2.7333
	0.46542	3.4506	0.46542	6.1216							0.46542	2.0315	0.46542	2.7387
	0.46569	3.4511	0.46569	6.1232							0.46569	2.0339	0.46569	2.7441
	0.46597	3.4517	0.46597	6.1248							0.46597	2.0363	0.46597	2.7495
	0.46625	3.4522	0.46625	6.1264							0.46625	2.0387	0.46625	2.7549
	0.46653	3.4528	0.46653	6.1279							0.46653	2.0411	0.46653	2.7603
	0.46681	3.4534	0.46681	6.1295							0.46681	2.0435	0.46681	2.7657
	0.46708	3.4539	0.46708	6.1311							0.46708	2.0459	0.46708	2.7711
	0.46736	3.4545	0.46736	6.1327							0.46736	2.0482	0.46736	2.7765
	0.46764	3.455	0.46764	6.1342							0.46764	2.0506	0.46764	2.7819
	0.46792	3.4556	0.46792	6.1358							0.46792	2.053	0.46792	2.7873
	0.46819	3.4561	0.46819	6.1373							0.46819	2.0554	0.46819	2.7927
	0.46847	3.4567	0.46847	6.1389							0.46847	2.0577	0.46847	2.7981
	0.46875	3.4572	0.46875	6.1405							0.46875	2.0601	0.46875	2.8034
	0.46903	3.4578	0.46903	6.142							0.46903	2.0625	0.46903	2.8088
	0.46931	3.4583	0.46931	6.1436							0.46931	2.0648	0.46931	2.8142
	0.46958	3.4589	0.46958	6.1451							0.46958	2.0672	0.46958	2.8196
	0.46986	3.4594	0.46986	6.1467							0.46986	2.0695	0.46986	2.8249
	0.47014	3.46	0.47014	6.1482							0.47014	2.0719	0.47014	2.8303
	0.47042	3.4605	0.47042	6.1498							0.47042	2.0742	0.47042	2.8356
	0.47069	3.4611	0.47069	6.1513							0.47069	2.0766	0.47069	2.841
	0.47097	3.4616	0.47097	6.1529							0.47097	2.0789	0.47097	2.8463
	0.47125	3.4621	0.47125	6.1544							0.47125	2.0813	0.47125	2.8517
	0.47153	3.4627	0.47153	6.1559							0.47153	2.0836	0.47153	2.857
	0.47181	3.4632	0.47181	6.1575							0.47181	2.0859	0.47181	2.8624
	0.47208	3.4638	0.47208	6.159							0.47208	2.0883	0.47208	2.8677
	0.47236	3.4643	0.47236	6.1605							0.47236	2.0906	0.47236	2.873
	0.47264	3.4648	0.47264	6.1621							0.47264	2.0929	0.47264	2.8783
	0.47292	3.4654	0.47292	6.1636							0.47292	2.0953	0.47292	2.8837
	0.47319	3.4659	0.47319	6.1651							0.47319	2.0976	0.47319	2.889
	0.47347	3.4665	0.47347	6.1666							0.47347	2.0999	0.47347	2.8943
	0.47375	3.467	0.47375	6.1682							0.47375	2.1022	0.47375	2.8996
	0.47403	3.4675	0.47403	6.1697							0.47403	2.1045	0.47403	2.9049
	0.47431	3.4681	0.47431	6.1712							0.47431	2.1069	0.47431	2.9102
	0.47458	3.4686	0.47458	6.1727							0.47458	2.1092	0.47458	2.9155
	0.47486	3.4691	0.47486	6.1742							0.47486	2.1115	0.47486	2.9208
	0.47514	3.4697	0.47514	6.1757							0.47514	2.1138	0.47514	2.9261
	0.47542	3.4702	0.47542	6.1772							0.47542	2.1161	0.47542	2.9314
	0.47569	3.4707	0.47569	6.1787							0.47569	2.1184	0.47569	2.9367
	0.47597	3.4712	0.47597	6.1802							0.47597	2.1207	0.47597	2.9419
	0.47625	3.4718	0.47625	6.1817							0.47625	2.123	0.47625	2.9472
	0.47653	3.4723	0.47653	6.1832							0.47653	2.1252	0.47653	2.9525
	0.47681	3.4728	0.47681	6.1847							0.47681	2.1275	0.47681	2.9578
	0.47708	3.4734	0.47708	6.1862							0.47708	2.1298	0.47708	2.963
	0.47736	3.4739	0.47736	6.1877							0.47736	2.1321	0.47736	2.9683
	0.47764	3.4744	0.47764	6.1892							0.47764	2.1344	0.47764	2.9735
	0.47792	3.4749	0.47792	6.1907							0.47792	2.1366	0.47792	2.9788
	0.47819	3.4754	0.47819	6.1922							0.47819	2.1389	0.47819	2.984
	0.47847	3.476	0.47847	6.1937							0.47847	2.1412	0.47847	2.9893
	0.47875	3.4765	0.47875	6.1951							0.47875	2.1434	0.47875	2.9945
	0.47903	3.477	0.47903	6.1966							0.47903	2.1457	0.47903	2.9997
	0.47931	3.4775	0.47931	6.1981							0.47931	2.148	0.47931	3.005
	0.47958	3.4781	0.47958	6.1996							0.47958	2.1502	0.47958	3.0102
	0.47986	3.4786	0.47986	6.2011							0.47986	2.1525	0.47986	3.0154
	0.48014	3.4791	0.48014	6.2025							0.48014	2.1547	0.48014	3.0206
	0.48042	3.4796	0.48042	6.204							0.48042	2.157	0.48042	3.0258
	0.48069	3.4801	0.48069	6.2055							0.48069	2.1592	0.48069	3.031
	0.48097	3.4806	0.48097	6.2069							0.48097	2.1615	0.48097	3.0362
	0.48125	3.4811	0.48125	6.2084							0.48125	2.1637	0.48125	3.0414
	0.48153	3.4817	0.48153	6.2099							0.48153	2.1659	0.48153	3.0466
	0.48181	3.4822	0.48181	6.2113							0.48181	2.1682	0.48181	3.0518
	0.48208	3.4827	0.48208	6.2128							0.48208	2.1704	0.48208	3.057
	0.48236	3.4832	0.48236	6.2142							0.48236	2.1726	0.48236	3.0622
	0.48264	3.4837	0.48264	6.2157							0.48264	2.1749	0.48264	3.0674
	0.48292	3.4842	0.48292	6.2171							0.48292	2.1771	0.48292	3.0725
	0.48319	3.4847	0.48319	6.2186							0.48319	2.1793	0.48319	3.0777
	0.48347	3.4852	0.48347	6.22							0.48347	2.1815	0.48347	3.0829
	0.48375	3.4857	0.48375	6.2215							0.48375	2.1837	0.48375	3.088
	0.48403	3.4863	0.48403	6.2229							0.48403	2.1859	0.48403	3.0932
	0.48431	3.4868	0.48431	6.2244							0.48431	2.1882	0.48431	3.0983
	0.48458	3.4873	0.48458	6.2258							0.48458	2.1904	0.48458	3.1035
	0.48486	3.4878	0.48486	6.2272							0.48486	2.1926	0.48486	3.1086
	0.48514	3.4883	0.48514	6.2287							0.48514	2.1948	0.48514	3.1137
	0.48542	3.4888	0.48542	6.2301							0.48542	2.197	0.48542	3.1189
	0.48569	3.4893	0.48569	6.2315							0.48569	2.1991	0.48569	3.124
	0.48597	3.4898	0.48597	6.233							0.48597	2.2013	0.48597	3.1291
	0.48625	3.4903	0.48625	6.2344							0.48625	2.2035	0.48625	3.1342
	0.48653	3.4908	0.48653	6.2358							0.48653	2.2057	0.48653	3.1393
	0.48681	3.4913	0.48681	6.2372							0.48681	2.2079	0.48681	3.1444
	0.48708	3.4918	0.48708	6.2387							0.48708	2.2101	0.48708	3.1495
	0.48736	3.4923	0.48736	6.2401							0.48736	2.2122	0.48736	3.1546
	0.48764	3.4928	0.48764	6.2415							0.48764	2.2144	0.48764	3.1597
	0.48792	3.4933	0.48792	6.2429							0.48792	2.2166	0.48792	3.1648
	0.48819	3.4938	0.48819	6.2443							0.48819	2.2187	0.48819	3.1699
	0.48847	3.4943	0.48847	6.2457							0.48847	2.2209	0.48847	3.175
	0.48875	3.4948	0.48875	6.2472							0.48875	2.2231	0.48875	3.1801
	0.48903	3.4953	0.48903	6.2486							0.48903	2.2252	0.48903	3.1851
	0.48931	3.4957	0.48931	6.25							0.48931	2.2274	0.48931	3.1902
	0.48958	3.4962	0.48958	6.2514							0.48958	2.2295	0.48958	3.1952
	0.48986	3.4967	0.48986	6.2528							0.48986	2.2317	0.48986	3.2003
	0.49014	3.4972	0.49014	6.2542							0.49014	2.2338	0.49014	3.2053
	0.49042	3.4977	0.49042	6.2556							0.49042	2.236	0.49042	3.2104
	0.49069	3.4982	0.49069	6.257							0.49069	2.2381	0.49069	3.2154
	0.49097	3.4987	0.49097	6.2584							0.49097	2.2402	0.49097	3.2205
	0.49125	3.4992	0.49125	6.2598							0.49125	2.2424	0.49125	3.2255
	0.49153	3.4997	0.49153	6.2612							0.49153	2.2445	0.49153	3.2305
	0.49181	3.5002	0.49181	6.2625							0.49181	2.2466	0.49181	3.2355
	0.49208	3.5006	0.49208	6.2639							0.49208	2.2487	0.49208	3.2405
	0.49236	3.5011	0.49236	6.2653							0.49236	2.2509	0.49236	3.2456
	0.49264	3.5016	0.49264	6.2667							0.49264	2.253	0.49264	3.2506
	0.49292	3.5021	0.49292	6.2681							0.49292	2.2551	0.49292	3.2556
	0.49319	3.5026	0.49319	6.2695							0.49319	2.2572	0.49319	3.2605
	0.49347	3.5031	0.49347	6.2709							0.49347	2.2593	0.49347	3.2655
	0.49375	3.5035	0.49375	6.2722							0.49375	2.2614	0.49375	3.2705
	0.49403	3.504	0.49403	6.2736							0.49403	2.2635	0.49403	3.2755
	0.49431	3.5045	0.49431	6.275							0.49431	2.2656	0.49431	3.2805
	0.49458	3.505	0.49458	6.2764							0.49458	2.2677	0.49458	3.2854
	0.49486	3.5055	0.49486	6.2777							0.49486	2.2698	0.49486	3.2904
	0.49514	3.5059	0.49514	6.2791							0.49514	2.2719	0.49514	3.2954
	0.49542	3.5064	0.49542	6.2805							0.49542	2.274	0.49542	3.3003
	0.49569	3.5069	0.49569	6.2818							0.49569	2.2761	0.49569	3.3053
	0.49597	3.5074	0.49597	6.2832							0.49597	2.2781	0.49597	3.3102
	0.49625	3.5079	0.49625	6.2845							0.49625	2.2802	0.49625	3.3151
	0.49653	3.5083	0.49653	6.2859							0.49653	2.2823	0.49653	3.3201
	0.49681	3.5088	0.49681	6.2873							0.49681	2.2844	0.49681	3.325
	0.49708	3.5093	0.49708	6.2886							0.49708	2.2864	0.49708	3.3299
	0.49736	3.5098	0.49736	6.29							0.49736	2.2885	0.49736	3.3348
	0.49764	3.5102	0.49764	6.2913							0.49764	2.2906	0.49764	3.3397
	0.49792	3.5107	0.49792	6.2927							0.49792	2.2926	0.49792	3.3446
	0.49819	3.5112	0.49819	6.294							0.49819	2.2947	0.49819	3.3495
	0.49847	3.5116	0.49847	6.2954							0.49847	2.2967	0.49847	3.3544
	0.49875	3.5121	0.49875	6.2967							0.49875	2.2988	0.49875	3.3593
	0.49903	3.5126	0.49903	6.2981							0.49903	2.3008	0.49903	3.3642
	0.49931	3.5131	0.49931	6.2994							0.49931	2.3029	0.49931	3.3691
	0.49958	3.5135	0.49958	6.3008							0.49958	2.3049	0.49958	3.374
	0.49986	3.514	0.49986	6.3021							0.49986	2.3069	0.49986	3.3788
	0.50014	3.5145	0.50014	6.3034							0.50014	2.309	0.50014	3.3837
	0.50042	3.5149	0.50042	6.3048							0.50042	2.311	0.50042	3.3885
	0.50069	3.5154	0.50069	6.3061							0.50069	2.313	0.50069	3.3934
	0.50097	3.5159	0.50097	6.3074							0.50097	2.3151	0.50097	3.3982
	0.50125	3.5163	0.50125	6.3088							0.50125	2.3171	0.50125	3.4031
	0.50153	3.5168	0.50153	6.3101							0.50153	2.3191	0.50153	3.4079
	0.50181	3.5173	0.50181	6.3114							0.50181	2.3211	0.50181	3.4128
	0.50208	3.5177	0.50208	6.3128							0.50208	2.3231	0.50208	3.4176
	0.50236	3.5182	0.50236	6.3141							0.50236	2.3251	0.50236	3.4224
	0.50264	3.5186	0.50264	6.3154							0.50264	2.3271	0.50264	3.4272
	0.50292	3.5191	0.50292	6.3167							0.50292	2.3291	0.50292	3.432
	0.50319	3.5196	0.50319	6.318							0.50319	2.3311	0.50319	3.4368
	0.50347	3.52	0.50347	6.3194							0.50347	2.3331	0.50347	3.4416
	0.50375	3.5205	0.50375	6.3207							0.50375	2.3351	0.50375	3.4464
	0.50403	3.5209	0.50403	6.322							0.50403	2.3371	0.50403	3.4512
	0.50431	3.5214	0.50431	6.3233							0.50431	2.3391	0.50431	3.456
	0.50458	3.5219	0.50458	6.3246							0.50458	2.3411	0.50458	3.4608
	0.50486	3.5223	0.50486	6.3259							0.50486	2.3431	0.50486	3.4655
	0.50514	3.5228	0.50514	6.3272							0.50514	2.3451	0.50514	3.4703
	0.50542	3.5232	0.50542	6.3285							0.50542	2.347	0.50542	3.475
	0.50569	3.5237	0.50569	6.3299							0.50569	2.349	0.50569	3.4798
	0.50597	3.5241	0.50597	6.3312							0.50597	2.351	0.50597	3.4845
	0.50625	3.5246	0.50625	6.3325							0.50625	2.3529	0.50625	3.4893
	0.50653	3.525	0.50653	6.3338							0.50653	2.3549	0.50653	3.494
	0.50681	3.5255	0.50681	6.3351							0.50681	2.3569	0.50681	3.4988
	0.50708	3.526	0.50708	6.3363							0.50708	2.3588	0.50708	3.5035
	0.50736	3.5264	0.50736	6.3376							0.50736	2.3608	0.50736	3.5082
	0.50764	3.5269	0.50764	6.3389							0.50764	2.3627	0.50764	3.5129
	0.50792	3.5273	0.50792	6.3402							0.50792	2.3647	0.50792	3.5176
	0.50819	3.5278	0.50819	6.3415							0.50819	2.3666	0.50819	3.5223
	0.50847	3.5282	0.50847	6.3428							0.50847	2.3686	0.50847	3.527
	0.50875	3.5287	0.50875	6.3441							0.50875	2.3705	0.50875	3.5317
	0.50903	3.5291	0.50903	6.3454							0.50903	2.3724	0.50903	3.5364
	0.50931	3.5296	0.50931	6.3467							0.50931	2.3744	0.50931	3.5411
	0.50958	3.53	0.50958	6.348							0.50958	2.3763	0.50958	3.5458
	0.50986	3.5304	0.50986	6.3492							0.50986	2.3782	0.50986	3.5504
	0.51014	3.5309	0.51014	6.3505							0.51014	2.3801	0.51014	3.5551
	0.51042	3.5313	0.51042	6.3518							0.51042	2.3821	0.51042	3.5597
	0.51069	3.5318	0.51069	6.3531							0.51069	2.384	0.51069	3.5644
	0.51097	3.5322	0.51097	6.3543							0.51097	2.3859	0.51097	3.569
	0.51125	3.5327	0.51125	6.3556							0.51125	2.3878	0.51125	3.5737
	0.51153	3.5331	0.51153	6.3569							0.51153	2.3897	0.51153	3.5783
	0.51181	3.5336	0.51181	6.3582							0.51181	2.3916	0.51181	3.5829
	0.51208	3.534	0.51208	6.3594							0.51208	2.3935	0.51208	3.5876
	0.51236	3.5344	0.51236	6.3607							0.51236	2.3954	0.51236	3.5922
	0.51264	3.5349	0.51264	6.362							0.51264	2.3973	0.51264	3.5968
	0.51292	3.5353	0.51292	6.3632							0.51292	2.3992	0.51292	3.6014
	0.51319	3.5358	0.51319	6.3645							0.51319	2.4011	0.51319	3.606
	0.51347	3.5362	0.51347	6.3658							0.51347	2.403	0.51347	3.6106
	0.51375	3.5366	0.51375	6.367							0.51375	2.4049	0.51375	3.6152
	0.51403	3.5371	0.51403	6.3683							0.51403	2.4067	0.51403	3.6198
	0.51431	3.5375	0.51431	6.3695							0.51431	2.4086	0.51431	3.6244
	0.51458	3.538	0.51458	6.3708							0.51458	2.4105	0.51458	3.6289
	0.51486	3.5384	0.51486	6.3721							0.51486	2.4124	0.51486	3.6335
	0.51514	3.5388	0.51514	6.3733							0.51514	2.4142	0.51514	3.6381
	0.51542	3.5393	0.51542	6.3746							0.51542	2.4161	0.51542	3.6426
	0.51569	3.5397	0.51569	6.3758							0.51569	2.4179	0.51569	3.6472
	0.51597	3.5401	0.51597	6.3771							0.51597	2.4198	0.51597	3.6517
	0.51625	3.5406	0.51625	6.3783							0.51625	2.4217	0.51625	3.6562
	0.51653	3.541	0.51653	6.3795							0.51653	2.4235	0.51653	3.6608
	0.51681	3.5414	0.51681	6.3808							0.51681	2.4254	0.51681	3.6653
	0.51708	3.5419	0.51708	6.382							0.51708	2.4272	0.51708	3.6698
	0.51736	3.5423	0.51736	6.3833							0.51736	2.4291	0.51736	3.6743
	0.51764	3.5427	0.51764	6.3845							0.51764	2.4309	0.51764	3.6788
	0.51792	3.5432	0.51792	6.3858							0.51792	2.4327	0.51792	3.6833
	0.51819	3.5436	0.51819	6.387							0.51819	2.4346	0.51819	3.6878
	0.51847	3.544	0.51847	6.3882							0.51847	2.4364	0.51847	3.6923
	0.51875	3.5444	0.51875	6.3895							0.51875	2.4382	0.51875	3.6968
	0.51903	3.5449	0.51903	6.3907							0.51903	2.44	0.51903	3.7013
	0.51931	3.5453	0.51931	6.3919							0.51931	2.4419	0.51931	3.7057
	0.51958	3.5457	0.51958	6.3932							0.51958	2.4437	0.51958	3.7102
	0.51986	3.5462	0.51986	6.3944							0.51986	2.4455	0.51986	3.7147
	0.52014	3.5466	0.52014	6.3956							0.52014	2.4473	0.52014	3.7191
	0.52042	3.547	0.52042	6.3969							0.52042	2.4491	0.52042	3.7236
	0.52069	3.5474	0.52069	6.3981							0.52069	2.4509	0.52069	3.728
	0.52097	3.5479	0.52097	6.3993							0.52097	2.4527	0.52097	3.7325
	0.52125	3.5483	0.52125	6.4005							0.52125	2.4545	0.52125	3.7369
	0.52153	3.5487	0.52153	6.4017							0.52153	2.4563	0.52153	3.7413
	0.52181	3.5491	0.52181	6.403							0.52181	2.4581	0.52181	3.7457
	0.52208	3.5496	0.52208	6.4042							0.52208	2.4599	0.52208	3.7502
	0.52236	3.55	0.52236	6.4054							0.52236	2.4617	0.52236	3.7546
	0.52264	3.5504	0.52264	6.4066							0.52264	2.4635	0.52264	3.759
	0.52292	3.5508	0.52292	6.4078							0.52292	2.4653	0.52292	3.7634
	0.52319	3.5512	0.52319	6.409							0.52319	2.467	0.52319	3.7677
	0.52347	3.5517	0.52347	6.4103							0.52347	2.4688	0.52347	3.7721
	0.52375	3.5521	0.52375	6.4115							0.52375	2.4706	0.52375	3.7765
	0.52403	3.5525	0.52403	6.4127							0.52403	2.4724	0.52403	3.7809
	0.52431	3.5529	0.52431	6.4139							0.52431	2.4741	0.52431	3.7852
	0.52458	3.5533	0.52458	6.4151							0.52458	2.4759	0.52458	3.7896
	0.52486	3.5538	0.52486	6.4163							0.52486	2.4776	0.52486	3.794
	0.52514	3.5542	0.52514	6.4175							0.52514	2.4794	0.52514	3.7983
	0.52542	3.5546	0.52542	6.4187							0.52542	2.4812	0.52542	3.8027
	0.52569	3.555	0.52569	6.4199							0.52569	2.4829	0.52569	3.807
	0.52597	3.5554	0.52597	6.4211							0.52597	2.4847	0.52597	3.8113
	0.52625	3.5558	0.52625	6.4223							0.52625	2.4864	0.52625	3.8156
	0.52653	3.5563	0.52653	6.4235							0.52653	2.4881	0.52653	3.82
	0.52681	3.5567	0.52681	6.4247							0.52681	2.4899	0.52681	3.8243
	0.52708	3.5571	0.52708	6.4259							0.52708	2.4916	0.52708	3.8286
	0.52736	3.5575	0.52736	6.4271							0.52736	2.4934	0.52736	3.8329
	0.52764	3.5579	0.52764	6.4283							0.52764	2.4951	0.52764	3.8372
	0.52792	3.5583	0.52792	6.4295							0.52792	2.4968	0.52792	3.8415
	0.52819	3.5587	0.52819	6.4306							0.52819	2.4985	0.52819	3.8457
	0.52847	3.5592	0.52847	6.4318							0.52847	2.5003	0.52847	3.85
	0.52875	3.5596	0.52875	6.433							0.52875	2.502	0.52875	3.8543
	0.52903	3.56	0.52903	6.4342							0.52903	2.5037	0.52903	3.8586
	0.52931	3.5604	0.52931	6.4354							0.52931	2.5054	0.52931	3.8628
	0.52958	3.5608	0.52958	6.4366							0.52958	2.5071	0.52958	3.8671
	0.52986	3.5612	0.52986	6.4378							0.52986	2.5088	0.52986	3.8713
	0.53014	3.5616	0.53014	6.4389							0.53014	2.5105	0.53014	3.8756
	0.53042	3.562	0.53042	6.4401							0.53042	2.5122	0.53042	3.8798
	0.53069	3.5624	0.53069	6.4413							0.53069	2.5139	0.53069	3.884
	0.53097	3.5628	0.53097	6.4425							0.53097	2.5156	0.53097	3.8883
	0.53125	3.5632	0.53125	6.4436							0.53125	2.5173	0.53125	3.8925
	0.53153	3.5636	0.53153	6.4448							0.53153	2.519	0.53153	3.8967
	0.53181	3.5641	0.53181	6.446							0.53181	2.5207	0.53181	3.9009
	0.53208	3.5645	0.53208	6.4472							0.53208	2.5224	0.53208	3.9051
	0.53236	3.5649	0.53236	6.4483							0.53236	2.524	0.53236	3.9093
	0.53264	3.5653	0.53264	6.4495							0.53264	2.5257	0.53264	3.9135
	0.53292	3.5657	0.53292	6.4507							0.53292	2.5274	0.53292	3.9177
	0.53319	3.5661	0.53319	6.4518							0.53319	2.5291	0.53319	3.9218
	0.53347	3.5665	0.53347	6.453							0.53347	2.5307	0.53347	3.926
	0.53375	3.5669	0.53375	6.4542							0.53375	2.5324	0.53375	3.9302
	0.53403	3.5673	0.53403	6.4553							0.53403	2.5341	0.53403	3.9343
	0.53431	3.5677	0.53431	6.4565							0.53431	2.5357	0.53431	3.9385
	0.53458	3.5681	0.53458	6.4576							0.53458	2.5374	0.53458	3.9426
	0.53486	3.5685	0.53486	6.4588							0.53486	2.539	0.53486	3.9468
	0.53514	3.5689	0.53514	6.46							0.53514	2.5407	0.53514	3.9509
	0.53542	3.5693	0.53542	6.4611							0.53542	2.5423	0.53542	3.955
	0.53569	3.5697	0.53569	6.4623							0.53569	2.544	0.53569	3.9591
	0.53597	3.5701	0.53597	6.4634							0.53597	2.5456	0.53597	3.9633
	0.53625	3.5705	0.53625	6.4646							0.53625	2.5473	0.53625	3.9674
	0.53653	3.5709	0.53653	6.4657							0.53653	2.5489	0.53653	3.9715
	0.53681	3.5713	0.53681	6.4669							0.53681	2.5505	0.53681	3.9756
	0.53708	3.5717	0.53708	6.468							0.53708	2.5522	0.53708	3.9797
	0.53736	3.5721	0.53736	6.4692							0.53736	2.5538	0.53736	3.9838
	0.53764	3.5725	0.53764	6.4703							0.53764	2.5554	0.53764	3.9878
	0.53792	3.5729	0.53792	6.4715							0.53792	2.557	0.53792	3.9919
	0.53819	3.5733	0.53819	6.4726							0.53819	2.5586	0.53819	3.996
	0.53847	3.5737	0.53847	6.4738							0.53847	2.5603	0.53847	4
	0.53875	3.5741	0.53875	6.4749							0.53875	2.5619	0.53875	4.0041
	0.53903	3.5745	0.53903	6.476							0.53903	2.5635	0.53903	4.0082
	0.53931	3.5749	0.53931	6.4772							0.53931	2.5651	0.53931	4.0122
	0.53958	3.5752	0.53958	6.4783							0.53958	2.5667	0.53958	4.0162
	0.53986	3.5756	0.53986	6.4795							0.53986	2.5683	0.53986	4.0203
	0.54014	3.576	0.54014	6.4806							0.54014	2.5699	0.54014	4.0243
	0.54042	3.5764	0.54042	6.4817							0.54042	2.5715	0.54042	4.0283
	0.54069	3.5768	0.54069	6.4829							0.54069	2.5731	0.54069	4.0323
	0.54097	3.5772	0.54097	6.484							0.54097	2.5747	0.54097	4.0363
	0.54125	3.5776	0.54125	6.4851							0.54125	2.5763	0.54125	4.0403
	0.54153	3.578	0.54153	6.4863							0.54153	2.5778	0.54153	4.0443
	0.54181	3.5784	0.54181	6.4874							0.54181	2.5794	0.54181	4.0483
	0.54208	3.5788	0.54208	6.4885							0.54208	2.581	0.54208	4.0523
	0.54236	3.5792	0.54236	6.4896							0.54236	2.5826	0.54236	4.0563
	0.54264	3.5795	0.54264	6.4908							0.54264	2.5842	0.54264	4.0603
	0.54292	3.5799	0.54292	6.4919							0.54292	2.5857	0.54292	4.0642
	0.54319	3.5803	0.54319	6.493							0.54319	2.5873	0.54319	4.0682
	0.54347	3.5807	0.54347	6.4941							0.54347	2.5889	0.54347	4.0722
	0.54375	3.5811	0.54375	6.4953							0.54375	2.5904	0.54375	4.0761
	0.54403	3.5815	0.54403	6.4964							0.54403	2.592	0.54403	4.0801
	0.54431	3.5819	0.54431	6.4975							0.54431	2.5935	0.54431	4.084
	0.54458	3.5823	0.54458	6.4986							0.54458	2.5951	0.54458	4.0879
	0.54486	3.5826	0.54486	6.4997							0.54486	2.5966	0.54486	4.0919
	0.54514	3.583	0.54514	6.5009							0.54514	2.5982	0.54514	4.0958
	0.54542	3.5834	0.54542	6.502							0.54542	2.5997	0.54542	4.0997
	0.54569	3.5838	0.54569	6.5031							0.54569	2.6013	0.54569	4.1036
	0.54597	3.5842	0.54597	6.5042							0.54597	2.6028	0.54597	4.1075
	0.54625	3.5846	0.54625	6.5053							0.54625	2.6043	0.54625	4.1114
	0.54653	3.585	0.54653	6.5064							0.54653	2.6059	0.54653	4.1153
	0.54681	3.5853	0.54681	6.5075							0.54681	2.6074	0.54681	4.1192
	0.54708	3.5857	0.54708	6.5086							0.54708	2.6089	0.54708	4.1231
	0.54736	3.5861	0.54736	6.5097							0.54736	2.6105	0.54736	4.1269
	0.54764	3.5865	0.54764	6.5109							0.54764	2.612	0.54764	4.1308
	0.54792	3.5869	0.54792	6.512							0.54792	2.6135	0.54792	4.1347
	0.54819	3.5872	0.54819	6.5131							0.54819	2.615	0.54819	4.1385
	0.54847	3.5876	0.54847	6.5142							0.54847	2.6165	0.54847	4.1424
	0.54875	3.588	0.54875	6.5153							0.54875	2.618	0.54875	4.1462
	0.54903	3.5884	0.54903	6.5164							0.54903	2.6196	0.54903	4.15
	0.54931	3.5888	0.54931	6.5175							0.54931	2.6211	0.54931	4.1539
	0.54958	3.5891	0.54958	6.5186							0.54958	2.6226	0.54958	4.1577
	0.54986	3.5895	0.54986	6.5197							0.54986	2.6241	0.54986	4.1615
	0.55014	3.5899	0.55014	6.5208							0.55014	2.6256	0.55014	4.1653
	0.55042	3.5903	0.55042	6.5219							0.55042	2.6271	0.55042	4.1692
	0.55069	3.5907	0.55069	6.523							0.55069	2.6285	0.55069	4.173
	0.55097	3.591	0.55097	6.524							0.55097	2.63	0.55097	4.1768
	0.55125	3.5914	0.55125	6.5251							0.55125	2.6315	0.55125	4.1805
	0.55153	3.5918	0.55153	6.5262							0.55153	2.633	0.55153	4.1843
	0.55181	3.5922	0.55181	6.5273							0.55181	2.6345	0.55181	4.1881
	0.55208	3.5925	0.55208	6.5284							0.55208	2.636	0.55208	4.1919
	0.55236	3.5929	0.55236	6.5295							0.55236	2.6374	0.55236	4.1957
	0.55264	3.5933	0.55264	6.5306							0.55264	2.6389	0.55264	4.1994
	0.55292	3.5937	0.55292	6.5317							0.55292	2.6404	0.55292	4.2032
	0.55319	3.594	0.55319	6.5328							0.55319	2.6418	0.55319	4.2069
	0.55347	3.5944	0.55347	6.5338							0.55347	2.6433	0.55347	4.2107
	0.55375	3.5948	0.55375	6.5349							0.55375	2.6448	0.55375	4.2144
	0.55403	3.5952	0.55403	6.536							0.55403	2.6462	0.55403	4.2181
	0.55431	3.5955	0.55431	6.5371							0.55431	2.6477	0.55431	4.2219
	0.55458	3.5959	0.55458	6.5382							0.55458	2.6491	0.55458	4.2256
	0.55486	3.5963	0.55486	6.5392							0.55486	2.6506	0.55486	4.2293
[truncated: 8,002 more rows]

## Sheet: fig12
figure 12a	Tailings dam model		Earth-rockfill dam model				figure 12b	Tailings dam model		Earth-rockfill dam model
	t(h)	q(m^3/s)	t(h)	q(m^3/s)				t(h)	q(m^3/s)	t(h)	q(m^3/s)
	0.00014	0.1562	0.00014	0.1562				0.00014	0.1562	0.00014	0.1562
	0.00042	0.3691	0.00042	0.3124				0.00042	0.3124	0.00042	0.3124
	0.00069	0.37	0.00069	0.3129				0.00069	0.6239	0.00069	0.3128
	0.00097	0.3709	0.00097	0.3137				0.00097	0.8363	0.00097	0.3134
	0.00125	0.3718	0.00125	0.3144				0.00125	1.2045	0.00125	0.314
	0.00153	0.3727	0.00153	0.3152				0.03319	2.8742	0.03319	0.3146
	0.00181	0.3736	0.00181	0.3159				0.03347	2.882	0.03347	0.3152
	0.00208	0.3745	0.00208	0.3167				0.03375	2.8899	0.03375	0.3158
	0.00236	0.3754	0.00236	0.3174				0.03403	2.8978	0.03403	0.3164
	0.00264	0.3763	0.00264	0.3182				0.03431	3.315	0.03431	0.317
	0.00292	0.3772	0.00292	0.319				0.03458	3.3241	0.03458	0.3176
	0.00319	0.3781	0.00319	0.3197				0.03486	3.3333	0.03486	0.3182
	0.00347	0.379	0.00347	0.3205				0.03514	3.3425	0.03514	0.3189
	0.00375	0.3799	0.00375	0.3212				0.03542	3.3517	0.03542	0.3195
	0.00403	0.3809	0.00403	0.322				0.03569	3.361	0.03569	0.3201
	0.00431	0.3818	0.00431	0.3228				0.03597	3.3703	0.03597	0.3207
	0.00458	0.3827	0.00458	0.3235				0.03625	3.3796	0.03625	0.3213
	0.00486	0.3837	0.00486	0.3243				0.03653	3.3889	0.03653	0.3219
	0.00514	0.3846	0.00514	0.3251				0.03681	3.3983	0.03681	0.3226
	0.00542	0.3855	0.00542	0.3259				0.03708	3.4077	0.03708	0.3232
	0.00569	0.3865	0.00569	0.3266				0.03736	3.4171	0.03736	0.3238
	0.00597	0.3874	0.00597	0.3274				0.03764	3.4265	0.03764	0.3244
	0.00625	0.3884	0.00625	0.3282				0.03792	3.436	0.03792	0.3251
	0.00653	0.3893	0.00653	0.329				0.03819	3.4455	0.03819	0.3257
	0.00681	0.3903	0.00681	0.3298				0.03847	3.455	0.03847	0.3263
	0.00708	0.3912	0.00708	0.3305				0.03875	3.4646	0.03875	0.327
	0.00736	0.3922	0.00736	0.3313				0.03903	3.4742	0.03903	0.3276
	0.00764	0.3931	0.00764	0.3321				0.03931	3.4838	0.03931	0.3282
	0.00792	0.3941	0.00792	0.3329				0.03958	3.7543	0.03958	0.3289
	0.00819	0.395	0.00819	0.3337				0.03986	3.7647	0.03986	0.3295
	0.00847	0.396	0.00847	0.3345				0.04014	3.7752	0.04014	0.3301
	0.00875	0.397	0.00875	0.3353				0.04042	3.7857	0.04042	0.3308
	0.00903	0.398	0.00903	0.3361				0.04069	3.7962	0.04069	0.3314
	0.00931	0.3989	0.00931	0.3369				0.04097	3.8067	0.04097	0.3321
	0.00958	0.3999	0.00958	0.3377				0.04125	3.8173	0.04125	0.3327
	0.00986	0.4009	0.00986	0.3385				0.04153	3.828	0.04153	0.3334
	0.01014	0.4019	0.01014	0.3393				0.04181	3.8386	0.04181	0.334
	0.01042	0.4029	0.01042	0.3401				0.04208	3.8493	0.04208	0.3347
	0.01069	0.4039	0.01069	0.341				0.04236	3.86	0.04236	0.3353
	0.01097	0.4049	0.01097	0.3418				0.04264	3.8707	0.04264	0.336
	0.01125	0.4058	0.01125	0.3426				0.04292	3.8815	0.04292	0.3366
	0.01153	0.4068	0.01153	0.3434				0.04319	3.8923	0.04319	0.3373
	0.01181	0.4079	0.01181	0.3442				0.04347	3.9032	0.04347	0.338
	0.01208	0.4089	0.01208	0.3451				0.04375	3.914	0.04375	0.3386
	0.01236	0.4099	0.01236	0.3459				0.04403	3.925	0.04403	0.3393
	0.01264	0.4109	0.01264	0.3467				0.04431	3.9359	0.04431	0.34
	0.01292	0.4119	0.01292	0.3475				0.04458	3.9469	0.04458	0.3406
	0.01319	0.4129	0.01319	0.3484				0.04486	3.9579	0.04486	0.3413
	0.01347	0.4139	0.01347	0.3492				0.04514	3.9689	0.04514	0.342
	0.01375	0.415	0.01375	0.35				0.04542	3.98	0.04542	0.3426
	0.01403	0.416	0.01403	0.3509				0.04569	3.9911	0.04569	0.3433
	0.01431	0.417	0.01431	0.3517				0.04597	4.0022	0.04597	0.344
	0.01458	0.418	0.01458	0.3526				0.04625	4.0134	0.04625	0.3447
	0.01486	0.4191	0.01486	0.3534				0.04653	4.0246	0.04653	0.3453
	0.01514	0.4201	0.01514	0.3543				0.04681	4.0358	0.04681	0.346
	0.01542	0.4212	0.01542	0.3551				0.04708	4.047	0.04708	0.3467
	0.01569	0.4222	0.01569	0.356				0.04736	4.0583	0.04736	0.3474
	0.01597	0.4233	0.01597	0.3568				0.04764	4.0697	0.04764	0.3481
	0.01625	0.4243	0.01625	0.3577				0.04792	4.081	0.04792	0.3488
	0.01653	0.4254	0.01653	0.3586				0.04819	4.0924	0.04819	0.3495
	0.01681	0.4264	0.01681	0.3594				0.04847	4.1039	0.04847	0.3502
	0.01708	0.4275	0.01708	0.3603				0.04875	4.1153	0.04875	0.3509
	0.01736	0.4286	0.01736	0.3611				0.04903	4.6812	0.04903	0.3516
	0.01764	0.4296	0.01764	0.362				0.04931	4.6944	0.04931	0.3523
	0.01792	0.4307	0.01792	0.3629				0.04958	4.7076	0.04958	0.353
	0.01819	0.4318	0.01819	0.3638				0.04986	4.7209	0.04986	0.3537
	0.01847	0.4329	0.01847	0.3646				0.05014	4.7342	0.05014	0.3544
	0.01875	0.4339	0.01875	0.3655				0.05042	4.7475	0.05042	0.3551
	0.01903	0.435	0.01903	0.3664				0.05069	4.7609	0.05069	0.3558
	0.01931	0.4361	0.01931	0.3673				0.05097	4.7743	0.05097	0.3565
	0.01958	0.4372	0.01958	0.3682				0.05125	4.7878	0.05125	0.3572
	0.01986	0.4383	0.01986	0.3691				0.05153	4.8013	0.05153	0.3579
	0.02014	0.4394	0.02014	0.37				0.05181	4.8148	0.05181	0.3587
	0.02042	0.4405	0.02042	0.3709				0.05208	4.8284	0.05208	0.3594
	0.02069	0.4416	0.02069	0.3718				0.05236	4.842	0.05236	0.3601
	0.02097	0.4427	0.02097	0.3727				0.05264	4.8557	0.05264	0.3608
	0.02125	0.4438	0.02125	0.3736				0.05292	4.8694	0.05292	0.3615
	0.02153	0.445	0.02153	0.3745				0.05319	4.8831	0.05319	0.3623
	0.02181	0.4461	0.02181	0.3754				0.05347	4.8969	0.05347	0.363
	0.02208	0.4472	0.02208	0.3763				0.05375	4.9107	0.05375	0.3637
	0.02236	0.4483	0.02236	0.3772				0.05403	4.9246	0.05403	0.3645
	0.02264	0.4495	0.02264	0.3781				0.05431	4.9385	0.05431	0.3652
	0.02292	0.4506	0.02292	0.379				0.05458	4.9524	0.05458	0.366
	0.02319	0.4517	0.02319	0.3799				0.05486	4.9664	0.05486	0.3667
	0.02347	0.4529	0.02347	0.3809				0.05514	4.9805	0.05514	0.3674
	0.02375	0.454	0.02375	0.3818				0.05542	4.9945	0.05542	0.3682
	0.02403	0.4552	0.02403	0.3827				0.05569	5.0087	0.05569	0.3689
	0.02431	0.4563	0.02431	0.3837				0.05597	5.0228	0.05597	0.3697
	0.02458	0.4575	0.02458	0.3846				0.05625	5.037	0.05625	0.3704
	0.02486	0.4586	0.02486	0.3855				0.05653	5.0512	0.05653	0.3712
	0.02514	0.4598	0.02514	0.3865				0.05681	5.0655	0.05681	0.3719
	0.02542	0.461	0.02542	0.3874				0.05708	5.0799	0.05708	0.3727
	0.02569	0.4621	0.02569	0.3884				0.05736	5.0942	0.05736	0.3735
	0.02597	0.4633	0.02597	0.3893				0.05764	5.1086	0.05764	0.3742
	0.02625	0.4645	0.02625	0.3903				0.05792	5.1231	0.05792	0.375
	0.02653	0.4657	0.02653	0.3912				0.05819	5.1376	0.05819	0.3758
	0.02681	0.4669	0.02681	0.3922				0.05847	5.1521	0.05847	0.3765
	0.02708	0.4681	0.02708	0.3931				0.05875	5.1667	0.05875	0.3773
	0.02736	0.4693	0.02736	0.3941				0.05903	5.1813	0.05903	0.3781
	0.02764	0.4705	0.02764	0.395				0.05931	5.196	0.05931	0.3789
	0.02792	0.4717	0.02792	0.396				0.05958	5.2107	0.05958	0.3796
	0.02819	0.4729	0.02819	0.397				0.05986	5.2255	0.05986	0.3804
	0.02847	0.4741	0.02847	0.398				0.06014	5.2403	0.06014	0.3812
	0.02875	0.4753	0.02875	0.3989				0.06042	6.0045	0.06042	0.382
	0.02903	0.4765	0.02903	0.3999				0.06069	6.0216	0.06069	0.3828
	0.02931	0.4777	0.02931	0.4009				0.06097	6.0388	0.06097	0.3836
	0.02958	0.479	0.02958	0.4019				0.06125	6.056	0.06125	0.3844
	0.02986	0.4802	0.02986	0.4029				0.06153	6.0732	0.06153	0.3852
	0.03014	0.4814	0.03014	0.4039				0.06181	6.0905	0.06181	0.386
	0.03042	1.025	0.03042	0.4049				0.06208	6.1078	0.06208	0.3868
	0.03069	1.0279	0.03069	0.4058				0.06236	6.1252	0.06236	0.3876
	0.03097	1.762	0.03097	0.4068				0.06264	6.1427	0.06264	0.3884
	0.03125	2.3363	0.03125	0.4079				0.06292	6.1602	0.06292	0.3892
	0.03153	3.289	0.03153	0.4089				0.06319	6.1777	0.06319	0.39
	0.03181	3.9198	0.03181	0.4099				0.06347	6.1953	0.06347	0.3908
	0.03208	4.705	0.03208	0.4109				0.06375	6.2129	0.06375	0.3916
	0.03236	5.7052	0.03236	0.4119				0.06403	6.2306	0.06403	0.3924
	0.03264	6.8841	0.03264	0.4129				0.06431	6.2483	0.06431	0.3932
	0.03292	8.0444	0.03292	0.4139				0.06458	6.2661	0.06458	0.3941
	0.03319	9.1849	0.03319	0.415				0.06486	6.284	0.06486	0.3949
	0.03347	9.2167	0.03347	0.416				0.06514	6.3019	0.06514	0.3957
	0.03375	9.2485	0.03375	0.417				0.06542	6.3198	0.06542	0.3965
	0.03403	10.3122	0.03403	0.418				0.06569	6.3378	0.06569	0.3974
	0.03431	11.4583	0.03431	0.4191				0.06597	6.3558	0.06597	0.3982
	0.03458	11.4953	0.03458	0.4201				0.06625	6.8817	0.06625	0.399
	0.03486	11.5324	0.03486	0.4212				0.06653	6.9012	0.06653	0.3999
	0.03514	11.5696	0.03514	0.4222				0.06681	6.9208	0.06681	0.4007
	0.03542	11.6068	0.03542	0.4233				0.06708	6.9404	0.06708	0.4016
	0.03569	11.6442	0.03569	0.4243				0.06736	6.9601	0.06736	0.4024
	0.03597	11.6815	0.03597	0.4254				0.06764	6.9798	0.06764	0.4033
	0.03625	11.719	0.03625	0.4264				0.06792	6.9996	0.06792	0.4041
	0.03653	11.7565	0.03653	0.4275				0.06819	7.0194	0.06819	0.405
	0.03681	11.794	0.03681	0.4286				0.06847	7.7027	0.06847	0.4058
	0.03708	11.8317	0.03708	0.4296				0.06875	7.7243	0.06875	0.4067
	0.03736	11.8694	0.03736	0.4307				0.06903	7.7459	0.06903	0.4076
	0.03764	11.9072	0.03764	0.4318				0.06931	7.7676	0.06931	0.4084
	0.03792	11.945	0.03792	0.4329				0.06958	7.7893	0.06958	0.4093
	0.03819	11.9829	0.03819	0.4339				0.06986	7.8111	0.06986	0.4102
	0.03847	12.0208	0.03847	0.435				0.07014	7.8329	0.07014	0.411
	0.03875	12.0589	0.03875	0.4361				0.07042	7.8548	0.07042	0.4119
	0.03903	12.0969	0.03903	0.4372				0.07069	7.8767	0.07069	0.4128
	0.03931	12.1351	0.03931	0.4383				0.07097	7.8987	0.07097	0.4137
	0.03958	12.1733	0.03958	0.4394				0.07125	7.9208	0.07125	0.4146
	0.03986	12.2116	0.03986	0.4405				0.07153	7.9428	0.07153	0.4155
	0.04014	12.2499	0.04014	0.4416				0.07181	7.965	0.07181	0.4163
	0.04042	12.2883	0.04042	0.4427				0.07208	7.9872	0.07208	0.4172
	0.04069	12.3267	0.04069	0.4438				0.07236	8.0094	0.07236	0.4181
	0.04097	12.3652	0.04097	0.445				0.07264	8.0317	0.07264	0.419
	0.04125	12.4038	0.04125	0.4461				0.07292	8.0541	0.07292	0.4199
	0.04153	12.4424	0.04153	0.4472				0.07319	8.0764	0.07319	0.4208
	0.04181	12.4811	0.04181	0.4483				0.07347	8.0989	0.07347	0.4218
	0.04208	12.5198	0.04208	0.4495				0.07375	8.1214	0.07375	0.4227
	0.04236	12.5586	0.04236	0.4506				0.07403	8.1439	0.07403	0.4236
	0.04264	12.5974	0.04264	0.4517				0.07431	8.1665	0.07431	0.4245
	0.04292	12.6363	0.04292	0.4529				0.07458	9.4829	0.07458	0.4254
	0.04319	12.6753	0.04319	0.454				0.07486	9.5081	0.07486	0.4263
	0.04347	12.7143	0.04347	0.4552				0.07514	9.5334	0.07514	0.4273
	0.04375	12.7533	0.04375	0.4563				0.07542	9.5587	0.07542	0.4282
	0.04403	12.7925	0.04403	0.4575				0.07569	9.5841	0.07569	0.4291
	0.04431	12.8316	0.04431	0.4586				0.07597	9.6094	0.07597	0.4301
	0.04458	12.8708	0.04458	0.4598				0.07625	9.6349	0.07625	0.431
	0.04486	12.9101	0.04486	0.461				0.07653	9.6603	0.07653	0.4319
	0.04514	12.9494	0.04514	0.4621				0.07681	9.6859	0.07681	0.4329
	0.04542	12.9888	0.04542	0.4633				0.07708	9.7114	0.07708	0.4338
	0.04569	13.0282	0.04569	0.4645				0.07736	12.4674	0.07736	0.4348
	0.04597	13.0677	0.04597	0.4657				0.07764	12.5037	0.07764	0.4357
	0.04625	13.1072	0.04625	0.4669				0.07792	13.1154	0.07792	0.4367
	0.04653	13.1467	0.04653	0.4681				0.07819	13.151	0.07819	0.4376
	0.04681	13.1863	0.04681	0.4693				0.07847	13.1866	0.07847	0.4386
	0.04708	13.226	0.04708	0.4705				0.07875	13.8881	0.07875	0.4396
	0.04736	13.2657	0.04736	0.4717				0.07903	13.9226	0.07903	0.4405
	0.04764	13.3054	0.04764	0.4729				0.07931	14.9616	0.07931	0.4415
	0.04792	13.3452	0.04792	0.4741				0.07958	14.994	0.07958	0.4425
	0.04819	13.385	0.04819	0.4753				0.07986	15.0264	0.07986	0.4434
	0.04847	13.4249	0.04847	0.4765				0.08014	15.0586	0.08014	0.4444
	0.04875	13.4648	0.04875	0.4777				0.08042	15.0908	0.08042	0.4454
	0.04903	13.5047	0.04903	0.479				0.08069	15.1229	0.08069	0.4464
	0.04931	13.5447	0.04931	0.4802				0.08097	15.1549	0.08097	0.4474
	0.04958	13.5847	0.04958	0.4814				0.08125	15.1868	0.08125	0.4484
	0.04986	13.6248	0.04986	0.4827				0.08153	15.2187	0.08153	0.4494
	0.05014	13.6649	0.05014	0.4839				0.08181	15.2504	0.08181	0.4504
	0.05042	13.705	0.05042	0.4851				0.08208	15.2821	0.08208	0.4514
	0.05069	13.7452	0.05069	0.4864				0.08236	15.3137	0.08236	0.4524
	0.05097	13.7854	0.05097	0.4876				0.08264	15.3452	0.08264	0.4534
	0.05125	13.8257	0.05125	0.4889				0.08292	15.3767	0.08292	0.4544
	0.05153	13.866	0.05153	0.4902				0.08319	15.408	0.08319	0.4554
	0.05181	13.9063	0.05181	0.4914				0.08347	15.4393	0.08347	0.4564
	0.05208	13.9466	0.05208	0.4927				0.08375	15.4704	0.08375	0.4574
	0.05236	13.987	0.05236	0.494				0.08403	15.5015	0.08403	0.4585
	0.05264	14.0274	0.05264	0.4953				0.08431	15.5325	0.08431	0.4595
	0.05292	14.0679	0.05292	0.4965				0.08458	15.5634	0.08458	0.4605
	0.05319	14.1084	0.05319	0.4978				0.08486	15.5943	0.08486	0.4616
	0.05347	14.1489	0.05347	0.4991				0.08514	15.625	0.08514	0.4626
	0.05375	14.1894	0.05375	0.5004				0.08542	15.6556	0.08542	0.4636
	0.05403	14.2299	0.05403	0.5017				0.08569	15.6862	0.08569	0.4647
	0.05431	14.2705	0.05431	0.503				0.08597	15.7167	0.08597	0.4657
	0.05458	14.3112	0.05458	0.5043				0.08625	15.747	0.08625	0.4668
	0.05486	14.3518	0.05486	0.5056				0.08653	15.7773	0.08653	0.4678
	0.05514	14.3925	0.05514	0.507				0.08681	15.8075	0.08681	0.4689
	0.05542	14.4332	0.05542	0.5083				0.08708	15.8376	0.08708	0.47
	0.05569	14.4739	0.05569	0.5096				0.08736	15.8676	0.08736	0.471
	0.05597	14.5146	0.05597	0.5109				0.08764	15.8975	0.08764	0.4721
	0.05625	14.5554	0.05625	0.5123				0.08792	15.9273	0.08792	0.4732
	0.05653	14.5962	0.05653	0.5136				0.08819	15.957	0.08819	0.4742
	0.05681	14.637	0.05681	0.515				0.08847	15.9866	0.08847	0.4753
	0.05708	14.6778	0.05708	0.5163				0.08875	16.0162	0.08875	0.4764
	0.05736	14.7187	0.05736	0.5177				0.08903	16.0456	0.08903	0.4775
	0.05764	14.7596	0.05764	0.519				0.08931	16.0749	0.08931	0.4786
	0.05792	14.8004	0.05792	0.5204				0.08958	16.1041	0.08958	0.4797
	0.05819	14.8413	0.05819	0.5217				0.08986	16.1333	0.08986	0.4808
	0.05847	14.8822	0.05847	0.5231				0.09014	16.1623	0.09014	0.4819
	0.05875	14.9232	0.05875	0.5245				0.09042	16.1912	0.09042	0.483
	0.05903	14.9641	0.05903	0.5259				0.09069	16.22	0.09069	0.4841
	0.05931	15.0051	0.05931	0.5273				0.09097	16.2488	0.09097	0.4852
	0.05958	15.046	0.05958	0.5286				0.09125	16.2774	0.09125	0.4863
	0.05986	15.087	0.05986	0.53				0.09153	16.3059	0.09153	0.4874
	0.06014	15.128	0.06014	0.5314				0.09181	16.3344	0.09181	0.4886
	0.06042	15.169	0.06042	0.5328				0.09208	16.3627	0.09208	0.4897
	0.06069	15.21	0.06069	0.5343				0.09236	16.3909	0.09236	0.4908
	0.06097	15.251	0.06097	0.5357				0.09264	16.419	0.09264	0.4919
	0.06125	15.292	0.06125	0.5371				0.09292	16.447	0.09292	0.4931
	0.06153	15.3331	0.06153	0.5385				0.09319	16.4749	0.09319	0.4942
	0.06181	15.3741	0.06181	0.5399				0.09347	16.5027	0.09347	0.4954
	0.06208	15.4152	0.06208	0.5414				0.09375	16.5304	0.09375	0.4965
	0.06236	15.4562	0.06236	0.5428				0.09403	16.558	0.09403	0.4977
	0.06264	15.4973	0.06264	0.5443				0.09431	16.5855	0.09431	0.4988
	0.06292	15.5383	0.06292	0.5457				0.09458	16.6129	0.09458	0.5
	0.06319	15.5794	0.06319	0.5472				0.09486	16.6402	0.09486	0.5012
	0.06347	15.6204	0.06347	0.5486				0.09514	16.6673	0.09514	0.5023
	0.06375	15.6615	0.06375	0.5501				0.09542	16.6944	0.09542	0.5035
	0.06403	15.7025	0.06403	0.5515				0.09569	16.7213	0.09569	0.5047
	0.06431	15.7436	0.06431	0.553				0.09597	16.7482	0.09597	0.5059
	0.06458	15.7846	0.06458	0.5545				0.09625	16.7749	0.09625	0.507
	0.06486	15.8256	0.06486	0.556				0.09653	16.8015	0.09653	0.5082
	0.06514	15.8666	0.06514	0.5575				0.09681	16.828	0.09681	0.5094
	0.06542	15.9115	0.06542	0.5589				0.09708	16.8544	0.09708	0.5106
	0.06569	15.962	0.06569	0.5604				0.09736	16.8807	0.09736	0.5118
	0.06597	16.0139	0.06597	0.5619				0.09764	16.9069	0.09764	0.513
	0.06625	16.0658	0.06625	0.5635				0.09792	16.933	0.09792	0.5142
	0.06653	16.1175	0.06653	0.565				0.09819	16.9589	0.09819	0.5154
	0.06681	16.1692	0.06681	0.5665				0.09847	16.9848	0.09847	0.5167
	0.06708	16.2207	0.06708	0.568				0.09875	17.0105	0.09875	0.5179
	0.06736	16.2722	0.06736	0.5695				0.09903	17.0361	0.09903	0.5191
	0.06764	16.3235	0.06764	0.5711				0.09931	17.0616	0.09931	0.5203
	0.06792	16.3747	0.06792	0.5726				0.09958	17.087	0.09958	0.5216
	0.06819	16.4259	0.06819	0.5742				0.09986	17.1123	0.09986	0.5228
	0.06847	16.4769	0.06847	0.5757				0.10014	17.1375	0.10014	0.524
	0.06875	16.5278	0.06875	0.5773				0.10042	17.1625	0.10042	0.5253
	0.06903	16.5786	0.06903	0.5788				0.10069	17.1875	0.10069	0.5265
	0.06931	16.6293	0.06931	0.5804				0.10097	17.2123	0.10097	0.5278
	0.06958	16.6798	0.06958	0.582				0.10125	17.237	0.10125	0.529
	0.06986	16.7303	0.06986	0.5835				0.10153	17.2616	0.10153	0.5303
	0.07014	16.7806	0.07014	0.5851				0.10181	17.286	0.10181	0.5316
	0.07042	16.8308	0.07042	0.5867				0.10208	17.3104	0.10208	0.5328
	0.07069	16.8809	0.07069	0.5883				0.10236	17.3346	0.10236	0.5341
	0.07097	16.9309	0.07097	0.5899				0.10264	17.3587	0.10264	0.5354
	0.07125	16.9808	0.07125	0.5915				0.10292	17.3827	0.10292	0.5367
	0.07153	17.0305	0.07153	0.5931				0.10319	17.4066	0.10319	0.538
	0.07181	17.0801	0.07181	0.5947				0.10347	17.4304	0.10347	0.5393
	0.07208	17.1296	0.07208	0.5963				0.10375	17.454	0.10375	0.5406
	0.07236	17.179	0.07236	0.598				0.10403	17.4775	0.10403	0.5419
	0.07264	17.2282	0.07264	0.5996				0.10431	17.5009	0.10431	0.5432
	0.07292	17.2773	0.07292	0.6012				0.10458	17.5242	0.10458	0.5445
	0.07319	17.3262	0.07319	0.6029				0.10486	17.5474	0.10486	0.5458
	0.07347	17.3751	0.07347	0.6045				0.10514	17.5704	0.10514	0.5471
	0.07375	17.4238	0.07375	0.6062				0.10542	17.5933	0.10542	0.5484
	0.07403	17.4723	0.07403	0.6079				0.10569	17.6161	0.10569	0.5498
	0.07431	17.5208	0.07431	0.6095				0.10597	17.6388	0.10597	0.5511
	0.07458	17.5691	0.07458	0.6112				0.10625	17.6614	0.10625	0.5524
	0.07486	17.6173	0.07486	0.6129				0.10653	17.6838	0.10653	0.5538
	0.07514	17.6653	0.07514	0.6146				0.10681	17.7061	0.10681	0.5551
	0.07542	17.7131	0.07542	0.6162				0.10708	17.7283	0.10708	0.5565
	0.07569	17.7609	0.07569	0.6179				0.10736	17.7504	0.10736	0.5578
	0.07597	17.8085	0.07597	0.6196				0.10764	17.7723	0.10764	0.5592
	0.07625	17.856	0.07625	0.6213				0.10792	17.7941	0.10792	0.5606
	0.07653	17.9033	0.07653	0.6231				0.10819	17.8158	0.10819	0.5619
	0.07681	17.9504	0.07681	0.6248				0.10847	17.8374	0.10847	0.5633
	0.07708	17.9974	0.07708	0.6265				0.10875	17.8589	0.10875	0.5647
	0.07736	18.0443	0.07736	0.6282				0.10903	17.8802	0.10903	0.5661
	0.07764	18.091	0.07764	0.63				0.10931	17.9014	0.10931	0.5675
	0.07792	18.1376	0.07792	0.6317				0.10958	17.9224	0.10958	0.5688
	0.07819	18.184	0.07819	0.6335				0.10986	17.9434	0.10986	0.5702
	0.07847	18.2303	0.07847	0.6352				0.11014	17.9642	0.11014	0.5716
	0.07875	18.2764	0.07875	0.637				0.11042	17.9849	0.11042	0.5731
	0.07903	18.3224	0.07903	0.6388				0.11069	18.0055	0.11069	0.5745
	0.07931	18.3682	0.07931	0.6405				0.11097	18.0259	0.11097	0.5759
	0.07958	18.4138	0.07958	0.6423				0.11125	18.0462	0.11125	0.5773
	0.07986	18.4593	0.07986	0.6441				0.11153	18.0664	0.11153	0.5787
	0.08014	18.5046	0.08014	0.6459				0.11181	18.0865	0.11181	0.5802
	0.08042	18.5498	0.08042	0.6477				0.11208	18.1064	0.11208	0.5816
	0.08069	18.5948	0.08069	0.6495				0.11236	18.1263	0.11236	0.583
	0.08097	18.6396	0.08097	0.6513				0.11264	18.1459	0.11264	0.5845
	0.08125	18.6843	0.08125	0.6531				0.11292	18.1655	0.11292	0.5859
	0.08153	18.7288	0.08153	0.655				0.11319	18.1849	0.11319	0.5874
	0.08181	18.7732	0.08181	0.6568				0.11347	18.2042	0.11347	0.5889
	0.08208	18.8174	0.08208	0.6586				0.11375	18.2234	0.11375	0.5903
	0.08236	18.8614	0.08236	0.6605				0.11403	18.2424	0.11403	0.5918
	0.08264	18.9052	0.08264	0.6623				0.11431	18.2613	0.11431	0.5933
	0.08292	18.9489	0.08292	0.6642				0.11458	18.2801	0.11458	0.5948
	0.08319	18.9924	0.08319	0.6661				0.11486	18.2988	0.11486	0.5962
	0.08347	19.0357	0.08347	0.6679				0.11514	18.3173	0.11514	0.5977
	0.08375	19.0788	0.08375	0.6698				0.11542	18.3357	0.11542	0.5992
	0.08403	19.1218	0.08403	0.6717				0.11569	18.354	0.11569	0.6007
	0.08431	19.1646	0.08431	0.6736				0.11597	18.3721	0.11597	0.6022
	0.08458	19.2072	0.08458	0.6755				0.11625	18.3901	0.11625	0.6038
	0.08486	19.2497	0.08486	0.6774				0.11653	18.408	0.11653	0.6053
	0.08514	19.292	0.08514	0.6793				0.11681	18.4258	0.11681	0.6068
	0.08542	19.3341	0.08542	0.6812				0.11708	18.4434	0.11708	0.6083
	0.08569	19.376	0.08569	0.6831				0.11736	18.4609	0.11736	0.6099
	0.08597	19.4177	0.08597	0.6851				0.11764	18.4783	0.11764	0.6114
	0.08625	19.4593	0.08625	0.687				0.11792	18.4955	0.11792	0.6129
	0.08653	19.5006	0.08653	0.689				0.11819	18.5126	0.11819	0.6145
	0.08681	19.5418	0.08681	0.6909				0.11847	18.5296	0.11847	0.616
	0.08708	19.5828	0.08708	0.6929				0.11875	18.5464	0.11875	0.6176
	0.08736	19.6236	0.08736	0.6948				0.11903	18.5631	0.11903	0.6192
	0.08764	19.6642	0.08764	0.6968				0.11931	18.5797	0.11931	0.6207
	0.08792	19.7047	0.08792	0.6988				0.11958	18.5961	0.11958	0.6223
	0.08819	19.745	0.08819	0.7008				0.11986	18.6125	0.11986	0.6239
	0.08847	19.785	0.08847	0.7028				0.12014	18.6287	0.12014	0.6255
	0.08875	19.8249	0.08875	0.7048				0.12042	18.6447	0.12042	0.6271
	0.08903	19.8646	0.08903	0.7068				0.12069	18.6607	0.12069	0.6287
	0.08931	19.9041	0.08931	0.7088				0.12097	18.6765	0.12097	0.6303
	0.08958	19.9434	0.08958	0.7108				0.12125	18.6921	0.12125	0.6319
	0.08986	19.9825	0.08986	0.7129				0.12153	18.7077	0.12153	0.6335
	0.09014	20.0214	0.09014	0.7149				0.12181	18.7231	0.12181	0.6351
	0.09042	20.0601	0.09042	0.7169				0.12208	18.7384	0.12208	0.6368
	0.09069	20.0987	0.09069	0.719				0.12236	18.7535	0.12236	0.6384
	0.09097	20.137	0.09097	0.7211				0.12264	18.7685	0.12264	0.64
	0.09125	20.1751	0.09125	0.7231				0.12292	18.7834	0.12292	0.6417
	0.09153	20.2131	0.09153	0.7252				0.12319	18.7981	0.12319	0.6433
	0.09181	20.2509	0.09181	0.7273				0.12347	18.8127	0.12347	0.645
	0.09208	20.2884	0.09208	0.7294				0.12375	18.8272	0.12375	0.6467
	0.09236	20.3258	0.09236	0.7315				0.12403	18.8416	0.12403	0.6483
	0.09264	20.3629	0.09264	0.7336				0.12431	18.8558	0.12431	0.65
	0.09292	20.3998	0.09292	0.7357				0.12458	18.8699	0.12458	0.6517
	0.09319	20.4366	0.09319	0.7378				0.12486	18.8838	0.12486	0.6534
	0.09347	20.4731	0.09347	0.7399				0.12514	18.8976	0.12514	0.6551
	0.09375	20.5094	0.09375	0.7421				0.12542	18.9113	0.12542	0.6568
	0.09403	20.5455	0.09403	0.7442				0.12569	18.9249	0.12569	0.6585
	0.09431	20.5815	0.09431	0.7464				0.12597	18.9383	0.12597	0.6602
	0.09458	20.6172	0.09458	0.7485				0.12625	18.9516	0.12625	0.6619
	0.09486	20.6527	0.09486	0.7507				0.12653	18.9648	0.12653	0.6636
	0.09514	20.688	0.09514	0.7529				0.12681	18.9778	0.12681	0.6653
	0.09542	20.7231	0.09542	0.7551				0.12708	18.9907	0.12708	0.6671
	0.09569	20.758	0.09569	0.7572				0.12736	19.0035	0.12736	0.6688
	0.09597	20.7927	0.09597	0.7594				0.12764	19.0162	0.12764	0.6705
	0.09625	20.8271	0.09625	0.7616				0.12792	19.0287	0.12792	0.6723
	0.09653	20.8614	0.09653	0.7639				0.12819	19.0411	0.12819	0.6741
	0.09681	20.8954	0.09681	0.7661				0.12847	19.0533	0.12847	0.6758
	0.09708	20.9293	0.09708	0.7683				0.12875	19.0654	0.12875	0.6776
	0.09736	20.9629	0.09736	0.7706				0.12903	19.0774	0.12903	0.6794
	0.09764	20.9963	0.09764	0.7728				0.12931	19.0893	0.12931	0.6811
	0.09792	21.0295	0.09792	0.7751				0.12958	19.101	0.12958	0.6829
	0.09819	21.0625	0.09819	0.7773				0.12986	19.1126	0.12986	0.6847
	0.09847	21.0953	0.09847	0.7796				0.13014	19.1241	0.13014	0.6865
	0.09875	21.1279	0.09875	0.7819				0.13042	19.1354	0.13042	0.6883
	0.09903	21.1602	0.09903	0.7842				0.13069	19.1466	0.13069	0.6902
	0.09931	21.1924	0.09931	0.7865				0.13097	19.1577	0.13097	0.692
	0.09958	21.2243	0.09958	0.7888				0.13125	19.1687	0.13125	0.6938
	0.09986	21.256	0.09986	0.7911				0.13153	19.1795	0.13153	0.6956
	0.10014	21.2875	0.10014	0.7934				0.13181	19.1902	0.13181	0.6975
	0.10042	21.3188	0.10042	0.7957				0.13208	19.2007	0.13208	0.6993
	0.10069	21.3498	0.10069	0.7981				0.13236	19.2111	0.13236	0.7012
	0.10097	21.3806	0.10097	0.8004				0.13264	19.2214	0.13264	0.703
	0.10125	21.4113	0.10125	0.8028				0.13292	19.2316	0.13292	0.7049
	0.10153	21.4417	0.10153	0.8051				0.13319	19.2416	0.13319	0.7068
	0.10181	21.4719	0.10181	0.8075				0.13347	19.2515	0.13347	0.7086
	0.10208	22.154	0.10208	0.8098				0.13375	19.2613	0.13375	0.7105
	0.10236	22.1784	0.10236	0.8122				0.13403	19.2709	0.13403	0.7124
	0.10264	22.2025	0.10264	0.8146				0.13431	19.2804	0.13431	0.7143
	0.10292	22.2264	0.10292	0.817				0.13458	19.2898	0.13458	0.7161
	0.10319	22.2501	0.10319	0.8194				0.13486	19.2991	0.13486	0.718
	0.10347	22.2736	0.10347	0.8218				0.13514	19.3082	0.13514	0.7199
	0.10375	22.2968	0.10375	0.8242				0.13542	19.3172	0.13542	0.7218
	0.10403	22.3198	0.10403	0.8266				0.13569	19.326	0.13569	0.7237
	0.10431	22.3426	0.10431	0.829				0.13597	19.3348	0.13597	0.7257
	0.10458	22.3651	0.10458	0.8314				0.13625	19.3434	0.13625	0.7276
	0.10486	22.3874	0.10486	0.8339				0.13653	19.3519	0.13653	0.7295
	0.10514	22.4095	0.10514	0.8363				0.13681	19.3602	0.13681	0.7314
	0.10542	22.4314	0.10542	0.8388				0.13708	19.3685	0.13708	0.7333
	0.10569	22.453	0.10569	0.8412				0.13736	19.3765	0.13736	0.7353
	0.10597	22.4744	0.10597	0.8437				0.13764	19.3845	0.13764	0.7372
	0.10625	22.4956	0.10625	0.8461				0.13792	19.3923	0.13792	0.7392
	0.10653	22.5165	0.10653	0.8486				0.13819	19.4001	0.13819	0.7411
	0.10681	22.5373	0.10681	0.8511				0.13847	19.4076	0.13847	0.7431
	0.10708	22.5578	0.10708	0.8536				0.13875	19.4151	0.13875	0.745
	0.10736	22.578	0.10736	0.8561				0.13903	19.4224	0.13903	0.747
	0.10764	22.5981	0.10764	0.8586				0.13931	19.4296	0.13931	0.749
	0.10792	22.6179	0.10792	0.8611				0.13958	19.4367	0.13958	0.7509
	0.10819	22.6374	0.10819	0.8636				0.13986	19.4437	0.13986	0.7529
	0.10847	22.6568	0.10847	0.8661				0.14014	19.4505	0.14014	0.7549
	0.10875	22.6759	0.10875	0.8686				0.14042	19.4572	0.14042	0.7569
	0.10903	22.6948	0.10903	0.8712				0.14069	19.4638	0.14069	0.7589
	0.10931	23.132	0.10931	0.8737				0.14097	19.4702	0.14097	0.7609
	0.10958	23.1443	0.10958	0.8763				0.14125	19.4765	0.14125	0.7629
	0.10986	23.1564	0.10986	0.8788				0.14153	19.4827	0.14153	0.7649
	0.11014	23.1683	0.11014	0.8814				0.14181	19.4888	0.14181	0.7669
	0.11042	23.18	0.11042	0.884				0.14208	19.4947	0.14208	0.7689
	0.11069	23.1915	0.11069	0.8865				0.14236	19.5006	0.14236	0.771
	0.11097	23.2027	0.11097	0.8891				0.14264	19.5062	0.14264	0.773
	0.11125	23.1992	0.11125	0.8917				0.14292	19.5118	0.14292	0.775
	0.11153	23.1893	0.11153	0.8943				0.14319	19.5173	0.14319	0.7771
	0.11181	23.1792	0.11181	0.8969				0.14347	19.5226	0.14347	0.7791
	0.11208	23.169	0.11208	0.8995				0.14375	19.5278	0.14375	0.7812
	0.11236	23.1586	0.11236	0.9022				0.14403	19.5329	0.14403	0.7832
	0.11264	23.1481	0.11264	0.9048				0.14431	19.5378	0.14431	0.7853
	0.11292	23.1374	0.11292	0.9074				0.14458	19.5427	0.14458	0.7874
	0.11319	23.1266	0.11319	0.9101				0.14486	19.5474	0.14486	0.7894
	0.11347	23.1157	0.11347	0.9127				0.14514	19.552	0.14514	0.7915
	0.11375	23.1046	0.11375	0.9154				0.14542	19.5564	0.14542	0.7936
	0.11403	23.0934	0.11403	0.918				0.14569	19.5608	0.14569	0.7957
	0.11431	23.082	0.11431	0.9207				0.14597	19.565	0.14597	0.7978
	0.11458	23.0705	0.11458	0.9234				0.14625	19.5691	0.14625	0.7999
	0.11486	23.0588	0.11486	0.9261				0.14653	19.5731	0.14653	0.802
	0.11514	23.047	0.11514	0.9288				0.14681	19.5769	0.14681	0.8041
	0.11542	23.0351	0.11542	0.9315				0.14708	19.5807	0.14708	0.8062
	0.11569	23.0231	0.11569	0.9342				0.14736	19.5843	0.14736	0.8083
	0.11597	23.0109	0.11597	0.9369				0.14764	19.5878	0.14764	0.8104
	0.11625	22.9985	0.11625	0.9396				0.14792	19.5911	0.14792	0.8126
	0.11653	22.9861	0.11653	0.9424				0.14819	19.5944	0.14819	0.8147
	0.11681	22.9735	0.11681	0.9451				0.14847	19.5975	0.14847	0.8168
	0.11708	22.9607	0.11708	0.9478				0.14875	19.6005	0.14875	0.819
	0.11736	22.9478	0.11736	0.9506				0.14903	19.6035	0.14903	0.8211
	0.11764	22.9348	0.11764	0.9534				0.14931	19.6062	0.14931	0.8233
	0.11792	22.9217	0.11792	0.9561				0.14958	19.6089	0.14958	0.8254
	0.11819	22.9085	0.11819	0.9589				0.14986	19.6114	0.14986	0.8276
	0.11847	22.8951	0.11847	0.9617				0.15014	19.6139	0.15014	0.8298
	0.11875	22.8816	0.11875	0.9645				0.15042	19.6162	0.15042	0.8319
	0.11903	22.8679	0.11903	0.9673				0.15069	19.6184	0.15069	0.8341
	0.11931	22.8542	0.11931	0.9701				0.15097	19.6205	0.15097	0.8363
	0.11958	22.8403	0.11958	0.9729				0.15125	19.6224	0.15125	0.8385
	0.11986	22.8263	0.11986	0.9757				0.15153	19.6243	0.15153	0.8407
	0.12014	22.8121	0.12014	0.9786				0.15181	19.626	0.15181	0.8429
	0.12042	22.7979	0.12042	0.9814				0.15208	19.6276	0.15208	0.8451
	0.12069	22.7835	0.12069	0.9843				0.15236	19.6291	0.15236	0.8473
	0.12097	22.769	0.12097	0.9871				0.15264	19.6305	0.15264	0.8495
	0.12125	22.7544	0.12125	0.99				0.15292	19.6318	0.15292	0.8518
	0.12153	22.7396	0.12153	0.9928				0.15319	19.6329	0.15319	0.854
	0.12181	22.7248	0.12181	0.9957				0.15347	19.634	0.15347	0.8562
	0.12208	22.7098	0.12208	0.9986				0.15375	19.6349	0.15375	0.8585
	0.12236	22.6947	0.12236	1.0015				0.15403	19.6357	0.15403	0.8607
	0.12264	22.6795	0.12264	1.0044				0.15431	19.6364	0.15431	0.863
	0.12292	22.6642	0.12292	1.0073				0.15458	19.637	0.15458	0.8652
	0.12319	22.6487	0.12319	1.0102				0.15486	19.6375	0.15486	0.8675
	0.12347	22.6332	0.12347	1.0132				0.15514	19.6379	0.15514	0.8698
	0.12375	22.6175	0.12375	1.0161				0.15542	19.6381	0.15542	0.872
	0.12403	22.6018	0.12403	1.0191				0.15569	19.6383	0.15569	0.8743
	0.12431	22.5859	0.12431	1.022				0.15597	19.6383	0.15597	0.8766
	0.12458	22.5699	0.12458	1.025				0.15625	19.6382	0.15625	0.8789
	0.12486	22.5538	0.12486	1.0279				0.15653	19.638	0.15653	0.8812
	0.12514	22.5376	0.12514	1.0309				0.15681	19.6377	0.15681	0.8835
	0.12542	22.5213	0.12542	1.0339				0.15708	19.6373	0.15708	0.8858
	0.12569	22.5048	0.12569	1.0369				0.15736	19.6368	0.15736	0.8881
	0.12597	22.4883	0.12597	1.0399				0.15764	19.6362	0.15764	0.8904
	0.12625	22.4717	0.12625	1.0429				0.15792	19.6354	0.15792	0.8928
	0.12653	21.1137	0.12653	1.0459				0.15819	19.6346	0.15819	0.8951
	0.12681	21.0916	0.12681	1.049				0.15847	19.6336	0.15847	0.8974
	0.12708	21.0694	0.12708	1.052				0.15875	19.6326	0.15875	0.8998
	0.12736	21.0472	0.12736	1.0551				0.15903	19.6314	0.15903	0.9021
	0.12764	21.0249	0.12764	1.0581				0.15931	19.6301	0.15931	0.9045
	0.12792	21.0026	0.12792	1.0612				0.15958	19.6287	0.15958	0.9068
	0.12819	20.9803	0.12819	1.0643				0.15986	19.6273	0.15986	0.9092
	0.12847	20.9579	0.12847	1.0673				0.16014	19.6257	0.16014	0.9116
	0.12875	20.9354	0.12875	1.0704				0.16042	19.624	0.16042	0.914
	0.12903	20.9129	0.12903	1.0735				0.16069	19.6222	0.16069	0.9163
	0.12931	20.8904	0.12931	1.0766				0.16097	19.6203	0.16097	0.9187
	0.12958	20.8678	0.12958	1.0798				0.16125	19.6182	0.16125	0.9211
	0.12986	20.8451	0.12986	1.0829				0.16153	19.6161	0.16153	0.9235
	0.13014	20.8225	0.13014	1.086				0.16181	19.6139	0.16181	0.9259
	0.13042	20.7997	0.13042	1.0892				0.16208	19.6116	0.16208	0.9283
	0.13069	20.7769	0.13069	1.0923				0.16236	19.6092	0.16236	0.9308
	0.13097	20.7541	0.13097	1.0955				0.16264	19.6066	0.16264	0.9332
	0.13125	20.7313	0.13125	1.0986				0.16292	19.604	0.16292	0.9356
	0.13153	20.7083	0.13153	1.1018				0.16319	19.6012	0.16319	0.938
	0.13181	20.6854	0.13181	1.105				0.16347	19.5984	0.16347	0.9405
	0.13208	20.6624	0.13208	1.1082				0.16375	19.5955	0.16375	0.9429
	0.13236	20.6394	0.13236	1.1114				0.16403	19.5924	0.16403	0.9454
	0.13264	20.6163	0.13264	1.1146				0.16431	19.5893	0.16431	0.9478
	0.13292	20.5932	0.13292	1.1179				0.16458	19.5861	0.16458	0.9503
	0.13319	20.57	0.13319	1.1211				0.16486	19.5827	0.16486	0.9528
	0.13347	20.5468	0.13347	1.1243				0.16514	19.5793	0.16514	0.9552
	0.13375	20.5236	0.13375	1.1276				0.16542	19.5758	0.16542	0.9577
	0.13403	20.5004	0.13403	1.1309				0.16569	19.5721	0.16569	0.9602
	0.13431	20.4771	0.13431	1.1341				0.16597	19.5684	0.16597	0.9627
	0.13458	20.4538	0.13458	1.1374				0.16625	19.5646	0.16625	0.9652
	0.13486	20.4304	0.13486	1.1407				0.16653	19.5606	0.16653	0.9677
	0.13514	20.407	0.13514	1.144				0.16681	19.5566	0.16681	0.9702
	0.13542	20.3835	0.13542	1.1473				0.16708	19.5525	0.16708	0.9728
	0.13569	20.3601	0.13569	1.1507				0.16736	19.5483	0.16736	0.9753
	0.13597	20.3366	0.13597	1.154				0.16764	19.544	0.16764	0.9778
	0.13625	19.3028	0.13625	1.1573				0.16792	19.5395	0.16792	0.9803
	0.13653	19.2784	0.13653	1.1607				0.16819	19.535	0.16819	0.9829
	0.13681	19.2539	0.13681	1.164				0.16847	19.5304	0.16847	0.9854
	0.13708	19.2295	0.13708	1.1674				0.16875	19.5257	0.16875	0.988
	0.13736	19.205	0.13736	1.1708				0.16903	19.5209	0.16903	0.9906
	0.13764	19.1806	0.13764	1.1742				0.16931	19.5161	0.16931	0.9931
	0.13792	19.1561	0.13792	1.1776				0.16958	19.5111	0.16958	0.9957
	0.13819	19.1316	0.13819	1.181				0.16986	19.506	0.16986	0.9983
	0.13847	19.1072	0.13847	1.1844				0.17014	19.5008	0.17014	1.0009
	0.13875	19.0827	0.13875	1.1878				0.17042	19.4956	0.17042	1.0035
	0.13903	19.0582	0.13903	1.1913				0.17069	19.4902	0.17069	1.0061
	0.13931	19.0337	0.13931	1.1947				0.17097	19.4848	0.17097	1.0087
	0.13958	19.0092	0.13958	1.1982				0.17125	19.4793	0.17125	1.0113
	0.13986	18.9847	0.13986	1.2017				0.17153	19.4737	0.17153	1.0139
	0.14014	18.9602	0.14014	1.2052				0.17181	19.4679	0.17181	1.0165
	0.14042	18.9356	0.14042	1.2087				0.17208	19.4622	0.17208	1.0191
	0.14069	18.9111	0.14069	1.2122				0.17236	19.4563	0.17236	1.0218
	0.14097	18.8866	0.14097	1.2157				0.17264	19.4503	0.17264	1.0244
	0.14125	18.862	0.14125	1.2192				0.17292	19.4442	0.17292	1.0271
	0.14153	18.8375	0.14153	1.2227				0.17319	19.4381	0.17319	1.0297
	0.14181	18.813	0.14181	1.2263				0.17347	19.4319	0.17347	1.0324
	0.14208	18.7884	0.14208	1.2298				0.17375	19.4255	0.17375	1.0351
	0.14236	18.7639	0.14236	1.2334				0.17403	19.4191	0.17403	1.0377
	0.14264	17.1578	0.14264	1.237				0.17431	19.4126	0.17431	1.0404
	0.14292	17.1339	0.14292	1.2406				0.17458	19.406	0.17458	1.0431
	0.14319	17.1101	0.14319	1.2442				0.17486	19.3994	0.17486	1.0458
	0.14347	17.0862	0.14347	1.2478				0.17514	19.3926	0.17514	1.0485
	0.14375	17.0624	0.14375	1.2514				0.17542	19.3858	0.17542	1.0512
	0.14403	17.0385	0.14403	1.255				0.17569	19.3789	0.17569	1.0539
	0.14431	17.0147	0.14431	1.2587				0.17597	19.3719	0.17597	1.0566
	0.14458	16.9909	0.14458	1.2623				0.17625	19.3648	0.17625	1.0594
	0.14486	16.9672	0.14486	1.266				0.17653	19.3576	0.17653	1.0621
	0.14514	16.9435	0.14514	1.2697				0.17681	19.3503	0.17681	1.0648
	0.14542	16.9197	0.14542	1.2734				0.17708	19.343	0.17708	1.0676
	0.14569	16.896	0.14569	1.2771				0.17736	19.3356	0.17736	1.0703
	0.14597	16.8724	0.14597	1.2808				0.17764	19.3281	0.17764	1.0731
	0.14625	16.8487	0.14625	1.2845				0.17792	19.3205	0.17792	1.0759
	0.14653	16.8251	0.14653	1.2882				0.17819	19.3128	0.17819	1.0786
	0.14681	16.8014	0.14681	1.292				0.17847	19.3051	0.17847	1.0814
	0.14708	16.7779	0.14708	1.2957				0.17875	19.2972	0.17875	1.0842
	0.14736	16.7543	0.14736	1.2995				0.17903	19.2893	0.17903	1.087
	0.14764	16.127	0.14764	1.3033				0.17931	19.2813	0.17931	1.0898
	0.14792	16.1041	0.14792	1.3071				0.17958	19.2733	0.17958	1.0926
	0.14819	16.0812	0.14819	1.3109				0.17986	19.2652	0.17986	1.0954
	0.14847	16.0584	0.14847	1.3147				0.18014	19.2569	0.18014	1.0982
	0.14875	16.0356	0.14875	1.3185				0.18042	19.2486	0.18042	1.1011
	0.14903	16.0128	0.14903	1.3224				0.18069	19.2403	0.18069	1.1039
	0.14931	15.9901	0.14931	1.3262				0.18097	15.6003	0.18097	1.1067
	0.14958	15.9674	0.14958	1.3301				0.18125	15.5838	0.18125	1.1096
	0.14986	15.9447	0.14986	1.334				0.18153	15.5673	0.18153	1.1124
	0.15014	15.922	0.15014	1.3379				0.18181	15.5508	0.18181	1.1153
	0.15042	15.8994	0.15042	1.3418				0.18208	15.5343	0.18208	1.1182
	0.15069	15.8768	0.15069	1.3457				0.18236	15.5179	0.18236	1.1211
	0.15097	15.8542	0.15097	1.3496				0.18264	15.5014	0.18264	1.1239
	0.15125	15.8317	0.15125	1.3535				0.18292	15.4849	0.18292	1.1268
	0.15153	15.8092	0.15153	1.3575				0.18319	15.4684	0.18319	1.1297
	0.15181	15.7867	0.15181	1.3615				0.18347	15.452	0.18347	1.1326
	0.15208	15.7642	0.15208	1.3654				0.18375	15.4355	0.18375	1.1355
	0.15236	15.7418	0.15236	1.3694				0.18403	15.4191	0.18403	1.1385
	0.15264	15.7194	0.15264	1.3734				0.18431	15.4026	0.18431	1.1414
	0.15292	15.697	0.15292	1.3774				0.18458	15.3862	0.18458	1.1443
	0.15319	15.6747	0.15319	1.3815				0.18486	15.3697	0.18486	1.1472
	0.15347	15.6524	0.15347	1.3855				0.18514	15.3533	0.18514	1.1502
	0.15375	15.6301	0.15375	1.3896				0.18542	15.3369	0.18542	1.1531
	0.15403	15.6078	0.15403	1.3936				0.18569	15.3205	0.18569	1.1561
	0.15431	15.5856	0.15431	1.3977				0.18597	15.304	0.18597	1.1591
	0.15458	15.5634	0.15458	1.4018				0.18625	15.2876	0.18625	1.1621
	0.15486	15.5413	0.15486	1.4059				0.18653	15.2712	0.18653	1.165
	0.15514	15.5191	0.15514	1.41				0.18681	15.2548	0.18681	1.168
	0.15542	15.497	0.15542	1.4141				0.18708	15.2384	0.18708	1.171
	0.15569	15.475	0.15569	1.4183				0.18736	15.222	0.18736	1.174
	0.15597	15.4529	0.15597	1.4224				0.18764	15.2056	0.18764	1.177
	0.15625	15.4309	0.15625	1.4266				0.18792	15.1893	0.18792	1.1801
	0.15653	15.4089	0.15653	1.4308				0.18819	15.1729	0.18819	1.1831
	0.15681	15.387	0.15681	1.435				0.18847	15.1565	0.18847	1.1861
	0.15708	15.365	0.15708	1.4392				0.18875	15.1402	0.18875	1.1892
	0.15736	15.3432	0.15736	1.4434				0.18903	15.1238	0.18903	1.1922
	0.15764	15.3213	0.15764	1.4477				0.18931	15.1075	0.18931	1.1953
	0.15792	15.2995	0.15792	1.4519				0.18958	15.0911	0.18958	1.1983
	0.15819	15.2777	0.15819	1.4562				0.18986	15.0748	0.18986	1.2014
	0.15847	15.2559	0.15847	1.4605				0.19014	15.0585	0.19014	1.2045
	0.15875	15.2342	0.15875	1.4648				0.19042	15.0422	0.19042	1.2076
	0.15903	15.2125	0.15903	1.4691				0.19069	15.0259	0.19069	1.2107
	0.15931	15.1908	0.15931	1.4734				0.19097	15.0096	0.19097	1.2138
	0.15958	15.1692	0.15958	1.4778				0.19125	14.9933	0.19125	1.2169
	0.15986	15.1476	0.15986	1.4821				0.19153	14.977	0.19153	1.22
	0.16014	15.126	0.16014	1.4865				0.19181	14.9607	0.19181	1.2231
	0.16042	15.1045	0.16042	1.4909				0.19208	14.9444	0.19208	1.2262
	0.16069	15.083	0.16069	1.4953				0.19236	14.9282	0.19236	1.2294
	0.16097	15.0615	0.16097	1.4997				0.19264	14.9119	0.19264	1.2325
	0.16125	15.04	0.16125	1.5041				0.19292	14.8957	0.19292	1.2357
	0.16153	15.0186	0.16153	1.5085				0.19319	14.8795	0.19319	1.2388
	0.16181	14.9972	0.16181	1.513				0.19347	14.8632	0.19347	1.242
	0.16208	14.9759	0.16208	1.5175				0.19375	14.847	0.19375	1.2452
	0.16236	14.9545	0.16236	1.522				0.19403	14.8308	0.19403	1.2484
	0.16264	14.9333	0.16264	1.5265				0.19431	14.8146	0.19431	1.2516
	0.16292	14.912	0.16292	1.531				0.19458	14.7984	0.19458	1.2548
	0.16319	14.8908	0.16319	1.5355				0.19486	14.7822	0.19486	1.258
	0.16347	14.8696	0.16347	1.5401				0.19514	14.7661	0.19514	1.2612
	0.16375	14.8485	0.16375	1.5446				0.19542	14.7499	0.19542	1.2644
	0.16403	14.8274	0.16403	1.5492				0.19569	14.7338	0.19569	1.2677
	0.16431	14.8063	0.16431	1.5538				0.19597	14.7176	0.19597	1.2709
	0.16458	14.7852	0.16458	1.5584				0.19625	14.7015	0.19625	1.2742
	0.16486	14.7642	0.16486	1.563				0.19653	14.6854	0.19653	1.2774
	0.16514	14.7432	0.16514	1.5677				0.19681	14.6692	0.19681	1.2807
	0.16542	14.7222	0.16542	1.5723				0.19708	14.6531	0.19708	1.284
	0.16569	14.7013	0.16569	1.577				0.19736	14.637	0.19736	1.2872
	0.16597	14.6804	0.16597	1.5817				0.19764	14.621	0.19764	1.2905
	0.16625	14.6595	0.16625	1.5864				0.19792	14.6049	0.19792	1.2938
	0.16653	14.6387	0.16653	1.5911				0.19819	14.5889	0.19819	1.2971
	0.16681	14.6179	0.16681	1.5959				0.19847	14.5728	0.19847	1.3005
	0.16708	14.5971	0.16708	1.6006				0.19875	14.5568	0.19875	1.3038
	0.16736	14.5764	0.16736	1.6054				0.19903	14.5407	0.19903	1.3071
	0.16764	14.5557	0.16764	1.6102				0.19931	14.5247	0.19931	1.3105
	0.16792	14.535	0.16792	1.615				0.19958	14.5087	0.19958	1.3138
	0.16819	14.5144	0.16819	1.6198				0.19986	14.4927	0.19986	1.3172
	0.16847	14.4938	0.16847	1.6246				0.20014	14.4768	0.20014	1.3205
	0.16875	14.4733	0.16875	1.6295				0.20042	14.4608	0.20042	1.3239
	0.16903	14.4528	0.16903	1.6344				0.20069	14.4448	0.20069	1.3273
	0.16931	14.4323	0.16931	1.6393				0.20097	14.4289	0.20097	1.3307
	0.16958	14.4118	0.16958	1.6442				0.20125	14.413	0.20125	1.3341
	0.16986	14.3914	0.16986	1.6491				0.20153	14.397	0.20153	1.3375
	0.17014	14.371	0.17014	1.654				0.20181	14.3811	0.20181	1.3409
	0.17042	14.3506	0.17042	1.659				0.20208	14.3652	0.20208	1.3443
	0.17069	14.3303	0.17069	1.664				0.20236	14.3494	0.20236	1.3478
	0.17097	14.31	0.17097	1.669				0.20264	14.3335	0.20264	1.3512
	0.17125	14.2898	0.17125	1.674				0.20292	14.3176	0.20292	1.3547
	0.17153	14.2695	0.17153	1.679				0.20319	14.3018	0.20319	1.3581
	0.17181	14.2493	0.17181	1.6841				0.20347	14.2859	0.20347	1.3616
	0.17208	14.2292	0.17208	1.6891				0.20375	14.2701	0.20375	1.3651
	0.17236	14.2091	0.17236	1.6942				0.20403	14.2543	0.20403	1.3686
	0.17264	14.189	0.17264	1.6993				0.20431	14.2385	0.20431	1.3721
	0.17292	14.169	0.17292	1.7044				0.20458	14.2228	0.20458	1.3756
	0.17319	14.1489	0.17319	1.7096				0.20486	14.207	0.20486	1.3791
	0.17347	14.129	0.17347	1.7147				0.20514	14.1912	0.20514	1.3826
	0.17375	14.109	0.17375	1.7199				0.20542	14.1755	0.20542	1.3862
	0.17403	14.0891	0.17403	1.7251				0.20569	14.1598	0.20569	1.3897
	0.17431	14.0693	0.17431	1.7303				0.20597	14.1441	0.20597	1.3933
	0.17458	14.0494	0.17458	1.7355				0.20625	14.1284	0.20625	1.3968
	0.17486	14.0297	0.17486	1.7408				0.20653	14.1127	0.20653	1.4004
	0.17514	14.0099	0.17514	1.746				0.20681	14.097	0.20681	1.404
	0.17542	13.9902	0.17542	1.7513				0.20708	14.0813	0.20708	1.4076
	0.17569	13.9705	0.17569	1.7566				0.20736	14.0657	0.20736	1.4111
	0.17597	13.9508	0.17597	1.762				0.20764	14.0501	0.20764	1.4148
	0.17625	13.9312	0.17625	1.7673				0.20792	14.0344	0.20792	1.4184
	0.17653	13.9116	0.17653	1.7727				0.20819	14.0189	0.20819	1.422
	0.17681	13.892	0.17681	1.778				0.20847	14.0033	0.20847	1.4256
	0.17708	13.8725	0.17708	1.7834				0.20875	13.9877	0.20875	1.4293
	0.17736	13.853	0.17736	1.7889				0.20903	13.9722	0.20903	1.4329
	0.17764	13.8336	0.17764	1.7943				0.20931	13.9566	0.20931	1.4366
	0.17792	13.8142	0.17792	1.7998				0.20958	13.9411	0.20958	1.4403
	0.17819	13.7948	0.17819	1.8052				0.20986	13.9256	0.20986	1.444
	0.17847	13.7754	0.17847	1.8107				0.21014	13.9101	0.21014	1.4476
	0.17875	13.7561	0.17875	1.8163				0.21042	13.8946	0.21042	1.4513
	0.17903	13.7368	0.17903	1.8218				0.21069	13.8791	0.21069	1.4551
	0.17931	13.7176	0.17931	1.8273				0.21097	13.8637	0.21097	1.4588
	0.17958	13.6984	0.17958	1.8329				0.21125	13.8483	0.21125	1.4625
	0.17986	13.6792	0.17986	1.8385				0.21153	13.8328	0.21153	1.4663
	0.18014	13.6601	0.18014	1.8441				0.21181	13.8174	0.21181	1.47
	0.18042	13.641	0.18042	1.8498				0.21208	13.802	0.21208	1.4738
	0.18069	13.6219	0.18069	1.8554				0.21236	13.7867	0.21236	1.4775
	0.18097	13.6029	0.18097	1.8611				0.21264	13.7713	0.21264	1.4813
	0.18125	13.5839	0.18125	1.8668				0.21292	13.7559	0.21292	1.4851
	0.18153	13.5649	0.18153	1.8725				0.21319	13.7406	0.21319	1.4889
	0.18181	13.546	0.18181	1.8783				0.21347	13.7253	0.21347	1.4927
	0.18208	13.5271	0.18208	1.884				0.21375	13.71	0.21375	1.4965
	0.18236	13.5082	0.18236	1.8898				0.21403	13.6947	0.21403	1.5004
	0.18264	13.4894	0.18264	1.8956				0.21431	13.6794	0.21431	1.5042
	0.18292	13.4706	0.18292	1.9014				0.21458	13.6642	0.21458	1.5081
	0.18319	13.4519	0.18319	1.9073				0.21486	13.649	0.21486	1.5119
	0.18347	13.4332	0.18347	1.9131				0.21514	13.6338	0.21514	1.5158
	0.18375	13.4145	0.18375	1.919				0.21542	13.6185	0.21542	1.5197
	0.18403	13.3958	0.18403	1.9249				0.21569	13.6034	0.21569	1.5236
	0.18431	13.3772	0.18431	1.9309				0.21597	13.5882	0.21597	1.5275
	0.18458	13.3586	0.18458	1.9368				0.21625	13.573	0.21625	1.5314
	0.18486	13.3401	0.18486	1.9428				0.21653	13.5579	0.21653	1.5353
	0.18514	13.3216	0.18514	1.9488				0.21681	13.5428	0.21681	1.5392
	0.18542	13.3031	0.18542	1.9548				0.21708	13.5277	0.21708	1.5432
	0.18569	13.2847	0.18569	1.9608				0.21736	13.5126	0.21736	1.5471
	0.18597	13.2663	0.18597	1.9669				0.21764	13.4975	0.21764	1.5511
	0.18625	13.2479	0.18625	1.973				0.21792	13.4824	0.21792	1.5551
	0.18653	13.2296	0.18653	1.9791				0.21819	9.8707	0.21819	1.5591
	0.18681	13.2113	0.18681	1.9852				0.21847	9.8613	0.21847	1.5631
	0.18708	13.193	0.18708	1.9913				0.21875	9.8519	0.21875	1.5671
	0.18736	13.1748	0.18736	1.9975				0.21903	9.8425	0.21903	1.5711
	0.18764	13.1566	0.18764	2.0037				0.21931	9.8331	0.21931	1.5751
	0.18792	13.1384	0.18792	2.0099				0.21958	9.8238	0.21958	1.5792
	0.18819	13.1203	0.18819	2.0161				0.21986	9.8145	0.21986	1.5832
	0.18847	13.1022	0.18847	2.0224				0.22014	9.8051	0.22014	1.5873
	0.18875	13.0842	0.18875	2.0287				0.22042	9.7959	0.22042	1.5914
	0.18903	13.0662	0.18903	2.035				0.22069	9.7866	0.22069	1.5955
	0.18931	13.0482	0.18931	2.0413				0.22097	9.7773	0.22097	1.5995
	0.18958	13.0302	0.18958	2.0476				0.22125	9.7681	0.22125	1.6037
	0.18986	13.0123	0.18986	2.054				0.22153	9.7589	0.22153	1.6078
	0.19014	12.9945	0.19014	2.0604				0.22181	9.7497	0.22181	1.6119
	0.19042	12.9766	0.19042	2.0668				0.22208	9.7405	0.22208	1.6161
	0.19069	12.9588	0.19069	2.0733				0.22236	9.7313	0.22236	1.6202
	0.19097	12.941	0.19097	2.0797				0.22264	9.7222	0.22264	1.6244
	0.19125	12.9233	0.19125	2.0862				0.22292	9.713	0.22292	1.6285
	0.19153	12.9056	0.19153	2.0927				0.22319	9.7039	0.22319	1.6327
	0.19181	12.8879	0.19181	2.0993				0.22347	9.6948	0.22347	1.6369
	0.19208	12.8703	0.19208	2.1058				0.22375	9.6857	0.22375	1.6411
	0.19236	12.8527	0.19236	2.1124				0.22403	9.6767	0.22403	1.6454
	0.19264	12.8351	0.19264	2.119				0.22431	9.6676	0.22431	1.6496
	0.19292	12.8176	0.19292	2.1257				0.22458	9.6586	0.22458	1.6539
	0.19319	12.8001	0.19319	2.1323				0.22486	9.6495	0.22486	1.6581
	0.19347	12.7827	0.19347	2.139				0.22514	9.6405	0.22514	1.6624
	0.19375	12.7652	0.19375	2.1457				0.22542	9.6316	0.22542	1.6667
	0.19403	12.7479	0.19403	2.1524				0.22569	9.6226	0.22569	1.671
	0.19431	12.7305	0.19431	2.1592				0.22597	9.6136	0.22597	1.6753
	0.19458	12.7132	0.19458	2.166				0.22625	9.6047	0.22625	1.6796
	0.19486	12.6959	0.19486	2.1728				0.22653	9.5958	0.22653	1.6839
	0.19514	12.6786	0.19514	2.1796				0.22681	9.5869	0.22681	1.6883
	0.19542	12.6614	0.19542	2.1865				0.22708	9.578	0.22708	1.6926
	0.19569	12.6442	0.19569	2.1933				0.22736	9.5692	0.22736	1.697
	0.19597	12.6271	0.19597	2.2002				0.22764	9.5603	0.22764	1.7013
	0.19625	12.61	0.19625	2.2072				0.22792	9.5515	0.22792	1.7057
	0.19653	12.5929	0.19653	2.2141				0.22819	9.5427	0.22819	1.7101
	0.19681	12.5758	0.19681	2.2211				0.22847	9.5339	0.22847	1.7146
	0.19708	12.5588	0.19708	2.2281				0.22875	9.5251	0.22875	1.719
	0.19736	12.5418	0.19736	2.2351				0.22903	9.5164	0.22903	1.7234
	0.19764	12.5249	0.19764	2.2422				0.22931	9.5076	0.22931	1.7279
	0.19792	12.508	0.19792	2.2493				0.22958	9.4989	0.22958	1.7323
	0.19819	12.4911	0.19819	2.2564				0.22986	9.4902	0.22986	1.7368
	0.19847	12.4743	0.19847	2.2635				0.23014	9.4815	0.23014	1.7413
	0.19875	12.4575	0.19875	2.2707				0.23042	9.4728	0.23042	1.7458
	0.19903	12.4407	0.19903	2.2779				0.23069	9.4642	0.23069	1.7503
	0.19931	12.424	0.19931	2.2851				0.23097	9.4555	0.23097	1.7549
	0.19958	12.4073	0.19958	2.2923				0.23125	9.4469	0.23125	1.7594
	0.19986	12.3906	0.19986	2.2996				0.23153	9.4383	0.23153	1.764
	0.20014	12.374	0.20014	2.3069				0.23181	9.4297	0.23181	1.7685
	0.20042	12.3574	0.20042	2.3142				0.23208	9.4211	0.23208	1.7731
	0.20069	12.3408	0.20069	2.3216				0.23236	9.4125	0.23236	1.7777
	0.20097	12.3243	0.20097	2.3289				0.23264	9.404	0.23264	1.7823
	0.20125	12.3078	0.20125	2.3363				0.23292	9.3955	0.23292	1.787
	0.20153	12.2913	0.20153	2.3438				0.23319	9.387	0.23319	1.7916
	0.20181	12.2749	0.20181	2.3512				0.23347	9.3785	0.23347	1.7962
	0.20208	12.2585	0.20208	2.3587				0.23375	9.37	0.23375	1.8009
	0.20236	12.2422	0.20236	2.3662				0.23403	9.3615	0.23403	1.8056
	0.20264	12.2258	0.20264	2.3738				0.23431	9.3531	0.23431	1.8103
	0.20292	12.2095	0.20292	2.3813				0.23458	9.3446	0.23458	1.815
	0.20319	12.1933	0.20319	2.3889				0.23486	9.3362	0.23486	1.8197
	0.20347	12.1771	0.20347	2.3965				0.23514	9.3278	0.23514	1.8244
	0.20375	12.1609	0.20375	2.4042				0.23542	9.3195	0.23542	1.8292
	0.20403	12.1447	0.20403	2.4119				0.23569	9.3111	0.23569	1.8339
	0.20431	12.1286	0.20431	2.4196				0.23597	9.3027	0.23597	1.8387
	0.20458	12.1125	0.20458	2.4273				0.23625	9.2944	0.23625	1.8435
	0.20486	12.0965	0.20486	2.4351				0.23653	9.2861	0.23653	1.8483
	0.20514	12.0804	0.20514	2.4429				0.23681	9.2778	0.23681	1.8531
	0.20542	12.0645	0.20542	2.4507				0.23708	9.2695	0.23708	1.8579
	0.20569	12.0485	0.20569	2.4586				0.23736	9.2613	0.23736	1.8628
	0.20597	12.0326	0.20597	2.4665				0.23764	9.253	0.23764	1.8676
	0.20625	12.0167	0.20625	2.4744				0.23792	9.2448	0.23792	1.8725
	0.20653	12.0008	0.20653	2.4823				0.23819	9.2365	0.23819	1.8774
	0.20681	11.985	0.20681	2.4903				0.23847	9.2283	0.23847	1.8823
	0.20708	11.9692	0.20708	2.4983				0.23875	9.2202	0.23875	1.8872
	0.20736	11.9535	0.20736	2.5063				0.23903	9.212	0.23903	1.8921
	0.20764	11.9378	0.20764	2.5144				0.23931	9.2038	0.23931	1.8971
	0.20792	11.9221	0.20792	2.5225				0.23958	9.1957	0.23958	1.902
	0.20819	11.9064	0.20819	2.5306				0.23986	9.1876	0.23986	1.907
	0.20847	11.8908	0.20847	2.5387				0.24014	9.1795	0.24014	1.912
	0.20875	11.8752	0.20875	2.5469				0.24042	9.1714	0.24042	1.917
	0.20903	11.8596	0.20903	2.5551				0.24069	9.1633	0.24069	1.922
	0.20931	11.8441	0.20931	2.5633				0.24097	9.1552	0.24097	1.9271
	0.20958	11.8286	0.20958	2.5716				0.24125	9.1472	0.24125	1.9321
	0.20986	11.8132	0.20986	2.5799				0.24153	9.1391	0.24153	1.9372
	0.21014	11.7978	0.21014	2.5883				0.24181	9.1311	0.24181	1.9423
	0.21042	11.7824	0.21042	2.5966				0.24208	9.1231	0.24208	1.9474
	0.21069	11.767	0.21069	2.605				0.24236	9.1152	0.24236	1.9525
	0.21097	11.7517	0.21097	2.6134				0.24264	9.1072	0.24264	1.9576
	0.21125	11.7364	0.21125	2.6219				0.24292	9.0992	0.24292	1.9627
	0.21153	11.7212	0.21153	2.6304				0.24319	9.0913	0.24319	1.9679
	0.21181	11.7059	0.21181	2.6389				0.24347	9.0834	0.24347	1.9731
	0.21208	11.6907	0.21208	2.6475				0.24375	9.0755	0.24375	1.9783
	0.21236	11.1513	0.21236	2.656				0.24403	9.0676	0.24403	1.9835
	0.21264	11.1373	0.21264	2.6647				0.24431	9.0597	0.24431	1.9887
	0.21292	11.1234	0.21292	2.6733				0.24458	9.0519	0.24458	1.9939
	0.21319	11.1095	0.21319	2.682				0.24486	9.044	0.24486	1.9992
	0.21347	11.0956	0.21347	2.6907				0.24514	9.0362	0.24514	2.0044
	0.21375	11.0817	0.21375	2.6994				0.24542	9.0284	0.24542	2.0097
	0.21403	11.0679	0.21403	2.7082				0.24569	9.0206	0.24569	2.015
	0.21431	11.0541	0.21431	2.717				0.24597	9.0128	0.24597	2.0203
	0.21458	11.0404	0.21458	2.7259				0.24625	9.005	0.24625	2.0257
	0.21486	11.0266	0.21486	2.7348				0.24653	8.9973	0.24653	2.031
	0.21514	11.0129	0.21514	2.7437				0.24681	8.9896	0.24681	2.0364
	0.21542	10.9993	0.21542	2.7526				0.24708	8.9818	0.24708	2.0417
	0.21569	10.9856	0.21569	2.7616				0.24736	8.9741	0.24736	2.0471
	0.21597	10.972	0.21597	2.7706				0.24764	8.9664	0.24764	2.0526
	0.21625	10.9584	0.21625	2.7796				0.24792	8.9588	0.24792	2.058
	0.21653	10.9449	0.21653	2.7887				0.24819	8.9511	0.24819	2.0634
	0.21681	10.9313	0.21681	2.7978				0.24847	8.9435	0.24847	2.0689
	0.21708	10.9178	0.21708	2.807				0.24875	8.9358	0.24875	2.0744
	0.21736	10.9044	0.21736	2.8162				0.24903	8.9282	0.24903	2.0799
	0.21764	10.891	0.21764	2.8254				0.24931	8.9206	0.24931	2.0854
	0.21792	10.8776	0.21792	2.8346				0.24958	8.913	0.24958	2.0909
	0.21819	10.8642	0.21819	2.8439				0.24986	8.9055	0.24986	2.0964
	0.21847	10.8509	0.21847	2.8532				0.25014	8.8979	0.25014	2.102
	0.21875	10.8376	0.21875	2.8626				0.25042	8.8904	0.25042	2.1076
	0.21903	10.8243	0.21903	2.872				0.25069	8.8829	0.25069	2.1132
	0.21931	10.811	0.21931	2.8814				0.25097	8.8754	0.25097	2.1188
	0.21958	10.7978	0.21958	2.8909				0.25125	8.8679	0.25125	2.1244
	0.21986	10.7846	0.21986	2.9004				0.25153	8.8604	0.25153	2.1301
	0.22014	10.7715	0.22014	2.9099				0.25181	8.8529	0.25181	2.1357
	0.22042	10.3293	0.22042	2.9195				0.25208	8.8455	0.25208	2.1414
	0.22069	10.3172	0.22069	2.9291				0.25236	8.838	0.25236	2.1471
	0.22097	10.3051	0.22097	2.9387				0.25264	8.8306	0.25264	2.1528
	0.22125	10.293	0.22125	2.9484				0.25292	8.8232	0.25292	2.1585
	0.22153	10.281	0.22153	2.9581				0.25319	8.8158	0.25319	2.1643
	0.22181	10.269	0.22181	2.9678				0.25347	8.8084	0.25347	2.17
	0.22208	10.257	0.22208	2.9776				0.25375	8.8011	0.25375	2.1758
	0.22236	10.245	0.22236	2.9874				0.25403	8.7937	0.25403	2.1816
	0.22264	10.2331	0.22264	2.9973				0.25431	8.7864	0.25431	2.1874
	0.22292	10.2212	0.22292	3.0072				0.25458	8.7791	0.25458	2.1933
	0.22319	10.2093	0.22319	3.0171				0.25486	8.7718	0.25486	2.1991
	0.22347	10.1975	0.22347	3.0271				0.25514	8.7645	0.25514	2.205
	0.22375	10.1857	0.22375	3.0371				0.25542	8.7572	0.25542	2.2109
	0.22403	10.1739	0.22403	3.0471				0.25569	8.75	0.25569	2.2168
	0.22431	10.1621	0.22431	3.0572				0.25597	8.7427	0.25597	2.2227
	0.22458	10.1504	0.22458	3.0674				0.25625	8.7355	0.25625	2.2287
	0.22486	10.1387	0.22486	3.0775				0.25653	8.7283	0.25653	2.2346
	0.22514	10.127	0.22514	3.0877				0.25681	8.7211	0.25681	2.2406
	0.22542	10.1153	0.22542	3.0979				0.25708	8.7139	0.25708	2.2466
	0.22569	10.1037	0.22569	3.1082				0.25736	8.7067	0.25736	2.2526
	0.22597	10.0921	0.22597	3.1185				0.25764	8.6995	0.25764	2.2587
	0.22625	10.0805	0.22625	3.1289				0.25792	8.6924	0.25792	2.2647
	0.22653	10.069	0.22653	3.1393				0.25819	8.6853	0.25819	2.2708
	0.22681	10.0574	0.22681	3.1497				0.25847	8.6782	0.25847	2.2769
	0.22708	10.046	0.22708	3.1602				0.25875	8.6711	0.25875	2.283
	0.22736	10.0345	0.22736	3.1707				0.25903	8.664	0.25903	2.2891
	0.22764	10.023	0.22764	3.1812				0.25931	8.6569	0.25931	2.2952
	0.22792	10.0116	0.22792	3.1918				0.25958	8.6498	0.25958	2.3014
	0.22819	10.0002	0.22819	3.2025				0.25986	8.6428	0.25986	2.3076
	0.22847	9.9889	0.22847	3.2131				0.26014	8.6358	0.26014	2.3138
	0.22875	9.9775	0.22875	3.2238				0.26042	8.6287	0.26042	2.32
	0.22903	9.9662	0.22903	3.2346				0.26069	8.6217	0.26069	2.3262
	0.22931	9.955	0.22931	3.2454				0.26097	8.6147	0.26097	2.3325
	0.22958	9.9437	0.22958	3.2562				0.26125	8.6078	0.26125	2.3388
	0.22986	9.9325	0.22986	3.2671				0.26153	8.6008	0.26153	2.3451
	0.23014	9.9213	0.23014	3.278				0.26181	8.5939	0.26181	2.3514
	0.23042	9.9101	0.23042	3.289				0.26208	8.5869	0.26208	2.3577
	0.23069	9.899	0.23069	3.3				0.26236	8.58	0.26236	2.3641
	0.23097	9.8878	0.23097	3.311				0.26264	8.5731	0.26264	2.3704
	0.23125	9.8767	0.23125	3.3221				0.26292	8.5662	0.26292	2.3768
	0.23153	9.8657	0.23153	3.3332				0.26319	8.5593	0.26319	2.3832
	0.23181	9.8546	0.23181	3.3444				0.26347	8.5525	0.26347	2.3897
	0.23208	9.8436	0.23208	3.3556				0.26375	8.5456	0.26375	2.3961
	0.23236	9.8326	0.23236	3.3668				0.26403	8.5388	0.26403	2.4026
	0.23264	9.8216	0.23264	3.3781				0.26431	8.532	0.26431	2.4091
	0.23292	9.8107	0.23292	3.3895				0.26458	8.5251	0.26458	2.4156
	0.23319	9.7997	0.23319	3.4008				0.26486	8.5183	0.26486	2.4221
	0.23347	9.7888	0.23347	3.4123				0.26514	8.5116	0.26514	2.4286
	0.23375	9.778	0.23375	3.4237				0.26542	8.5048	0.26542	2.4352
	0.23403	9.7671	0.23403	3.4352				0.26569	8.498	0.26569	2.4418
	0.23431	9.7563	0.23431	3.4468				0.26597	8.4913	0.26597	2.4484
	0.23458	9.7455	0.23458	3.4584				0.26625	8.4846	0.26625	2.455
	0.23486	9.7348	0.23486	3.47				0.26653	8.4779	0.26653	2.4616
	0.23514	9.724	0.23514	3.4817				0.26681	8.4712	0.26681	2.4683
	0.23542	9.7133	0.23542	3.4934				0.26708	8.4645	0.26708	2.475
	0.23569	9.7026	0.23569	3.5052				0.26736	8.4578	0.26736	2.4817
	0.23597	9.6919	0.23597	3.517				0.26764	8.4511	0.26764	2.4884
	0.23625	9.6813	0.23625	3.5289				0.26792	8.4445	0.26792	2.4951
	0.23653	9.6707	0.23653	3.5408				0.26819	8.4379	0.26819	2.5019
	0.23681	9.6601	0.23681	3.5527				0.26847	8.4312	0.26847	2.5087
	0.23708	9.6495	0.23708	3.5647				0.26875	8.4246	0.26875	2.5155
	0.23736	9.639	0.23736	3.5768				0.26903	8.418	0.26903	2.5223
	0.23764	9.6285	0.23764	3.5889				0.26931	8.4115	0.26931	2.5291
	0.23792	9.618	0.23792	3.601				0.26958	8.4049	0.26958	2.536
	0.23819	9.6075	0.23819	3.6132				0.26986	8.3983	0.26986	2.5429
	0.23847	9.5971	0.23847	3.6254				0.27014	8.3918	0.27014	2.5498
	0.23875	9.5866	0.23875	3.6377				0.27042	8.3853	0.27042	2.5567
	0.23903	9.5763	0.23903	3.65				0.27069	8.3787	0.27069	2.5636
	0.23931	9.5659	0.23931	3.6624				0.27097	8.3722	0.27097	2.5706
	0.23958	9.5555	0.23958	3.6748				0.27125	8.3658	0.27125	2.5776
	0.23986	9.5452	0.23986	3.6872				0.27153	8.3593	0.27153	2.5846
	0.24014	9.5349	0.24014	3.6998				0.27181	8.3528	0.27181	2.5916
	0.24042	9.5247	0.24042	3.7123				0.27208	8.3463	0.27208	2.5986
	0.24069	9.5144	0.24069	3.7249				0.27236	8.3399	0.27236	2.6057
	0.24097	9.5042	0.24097	3.7376				0.27264	8.3335	0.27264	2.6128
	0.24125	9.494	0.24125	3.7503				0.27292	8.3271	0.27292	2.6199
	0.24153	9.4838	0.24153	3.763				0.27319	8.3207	0.27319	2.627
	0.24181	9.4736	0.24181	3.7758				0.27347	8.3143	0.27347	2.6342
	0.24208	9.4635	0.24208	3.7887				0.27375	8.3079	0.27375	2.6413
	0.24236	9.4534	0.24236	3.8016				0.27403	8.3015	0.27403	2.6485
	0.24264	9.4433	0.24264	3.8145				0.27431	8.2952	0.27431	2.6557
	0.24292	9.4333	0.24292	3.8275				0.27458	8.2888	0.27458	2.663
	0.24319	9.4232	0.24319	3.8405				0.27486	8.2825	0.27486	2.6702
	0.24347	9.4132	0.24347	3.8536				0.27514	8.2762	0.27514	2.6775
	0.24375	9.4033	0.24375	3.8668				0.27542	8.2699	0.27542	2.6848
	0.24403	9.3933	0.24403	3.88				0.27569	8.2636	0.27569	2.6921
	0.24431	9.3834	0.24431	3.8932				0.27597	8.2573	0.27597	2.6994
	0.24458	9.3734	0.24458	3.9065				0.27625	8.2511	0.27625	2.7068
	0.24486	9.3636	0.24486	3.9198				0.27653	8.2448	0.27653	2.7142
	0.24514	9.3537	0.24514	3.9332				0.27681	8.2386	0.27681	2.7216
	0.24542	9.3439	0.24542	3.9467				0.27708	8.2324	0.27708	2.729
	0.24569	9.334	0.24569	3.9602				0.27736	8.2262	0.27736	2.7364
	0.24597	9.3242	0.24597	3.9737				0.27764	8.22	0.27764	2.7439
	0.24625	9.3145	0.24625	3.9873				0.27792	8.2138	0.27792	2.7514
	0.24653	9.3047	0.24653	4.001				0.27819	8.2076	0.27819	2.7589
	0.24681	9.295	0.24681	4.0147				0.27847	8.2015	0.27847	2.7664
	0.24708	9.2853	0.24708	4.0285				0.27875	8.1953	0.27875	2.774
	0.24736	9.2756	0.24736	4.0423				0.27903	8.1892	0.27903	2.7815
	0.24764	9.266	0.24764	4.0561				0.27931	8.1831	0.27931	2.7891
	0.24792	9.2563	0.24792	4.07				0.27958	8.177	0.27958	2.7968
	0.24819	9.2467	0.24819	4.084				0.27986	8.1709	0.27986	2.8044
	0.24847	9.2371	0.24847	4.098				0.28014	8.1648	0.28014	2.8121
	0.24875	9.2276	0.24875	4.1121				0.28042	8.1587	0.28042	2.8197
	0.24903	9.218	0.24903	4.1262				0.28069	8.1527	0.28069	2.8275
	0.24931	9.2085	0.24931	4.1404				0.28097	8.1466	0.28097	2.8352
	0.24958	9.199	0.24958	4.1546				0.28125	8.1406	0.28125	2.8429
	0.24986	9.1895	0.24986	4.1689				0.28153	8.1346	0.28153	2.8507
	0.25014	9.1801	0.25014	4.1833				0.28181	8.1285	0.28181	2.8585
	0.25042	9.1706	0.25042	4.1977				0.28208	8.1225	0.28208	2.8663
	0.25069	9.1612	0.25069	4.2121				0.28236	8.1166	0.28236	2.8742
	0.25097	9.1519	0.25097	4.2266				0.28264	8.1106	0.28264	2.882
	0.25125	9.1425	0.25125	4.2412				0.28292	8.1046	0.28292	2.8899
	0.25153	9.1331	0.25153	4.2558				0.28319	8.0987	0.28319	2.8978
	0.25181	9.1238	0.25181	4.2705				0.28347	8.0927	0.28347	2.9058
	0.25208	9.1145	0.25208	4.2852				0.28375	8.0868	0.28375	2.9137
	0.25236	9.1052	0.25236	4.3				0.28403	8.0809	0.28403	2.9217
	0.25264	9.096	0.25264	4.3149				0.28431	8.075	0.28431	2.9297
	0.25292	9.0867	0.25292	4.3298				0.28458	8.0691	0.28458	2.9377
	0.25319	9.0775	0.25319	4.3447				0.28486	8.0632	0.28486	2.9458
	0.25347	9.0683	0.25347	4.3597				0.28514	8.0574	0.28514	2.9539
	0.25375	9.0592	0.25375	4.3748				0.28542	8.0515	0.28542	2.9619
	0.25403	9.05	0.25403	4.3899				0.28569	8.0457	0.28569	2.9701
	0.25431	9.0409	0.25431	4.4051				0.28597	8.0398	0.28597	2.9782
	0.25458	9.0318	0.25458	4.4204				0.28625	8.034	0.28625	2.9864
	0.25486	9.0227	0.25486	4.4357				0.28653	8.0282	0.28653	2.9946
	0.25514	9.0136	0.25514	4.451				0.28681	8.0224	0.28681	3.0028
	0.25542	9.0046	0.25542	4.4665				0.28708	8.0167	0.28708	3.011
	0.25569	8.9956	0.25569	4.4819				0.28736	8.0109	0.28736	3.0193
	0.25597	8.9866	0.25597	4.4975				0.28764	8.0051	0.28764	3.0276
	0.25625	8.9776	0.25625	4.5131				0.28792	7.9994	0.28792	3.0359
	0.25653	8.9687	0.25653	4.5287				0.28819	7.9936	0.28819	3.0442
	0.25681	8.9597	0.25681	4.5445				0.28847	7.9879	0.28847	3.0526
	0.25708	8.9508	0.25708	4.5602				0.28875	7.9822	0.28875	3.061
	0.25736	8.9419	0.25736	4.5761				0.28903	7.9765	0.28903	3.0694
	0.25764	8.9331	0.25764	4.592				0.28931	7.9708	0.28931	3.0778
	0.25792	8.9242	0.25792	4.6079				0.28958	7.9651	0.28958	3.0863
	0.25819	8.9154	0.25819	4.6239				0.28986	7.9595	0.28986	3.0947
	0.25847	8.9066	0.25847	4.64				0.29014	7.9538	0.29014	3.1032
	0.25875	8.8978	0.25875	4.6562				0.29042	7.9482	0.29042	3.1118
	0.25903	8.889	0.25903	4.6724				0.29069	7.9425	0.29069	3.1203
	0.25931	8.8803	0.25931	4.6886				0.29097	7.9369	0.29097	3.1289
	0.25958	8.8716	0.25958	4.705				0.29125	7.9313	0.29125	3.1375
	0.25986	8.8629	0.25986	4.7213				0.29153	7.9257	0.29153	3.1461
	0.26014	8.8542	0.26014	4.7378				0.29181	7.9201	0.29181	3.1548
	0.26042	8.8455	0.26042	4.7543				0.29208	7.9146	0.29208	3.1635
	0.26069	8.8369	0.26069	4.7709				0.29236	7.909	0.29236	3.1722
	0.26097	8.8283	0.26097	4.7875				0.29264	7.9034	0.29264	3.1809
	0.26125	8.8197	0.26125	4.8042				0.29292	7.8979	0.29292	3.1897
	0.26153	8.8111	0.26153	4.821				0.29319	7.8924	0.29319	3.1985
	0.26181	8.8026	0.26181	4.8378				0.29347	7.8869	0.29347	3.2073
	0.26208	8.794	0.26208	4.8547				0.29375	7.8813	0.29375	3.2161
	0.26236	8.7855	0.26236	4.8717				0.29403	7.8758	0.29403	3.225
	0.26264	8.777	0.26264	4.8887				0.29431	7.8704	0.29431	3.2338
	0.26292	8.7685	0.26292	4.9058				0.29458	7.8649	0.29458	3.2428
	0.26319	8.7601	0.26319	4.9229				0.29486	7.8594	0.29486	3.2517
	0.26347	8.7517	0.26347	4.9402				0.29514	7.854	0.29514	3.2607
	0.26375	8.7432	0.26375	4.9574				0.29542	7.8485	0.29542	3.2696
	0.26403	8.7348	0.26403	4.9748				0.29569	7.8431	0.29569	3.2787
	0.26431	8.7265	0.26431	4.9922				0.29597	7.8377	0.29597	3.2877
	0.26458	8.7181	0.26458	5.0097				0.29625	7.8323	0.29625	3.2968
	0.26486	8.7098	0.26486	5.0272				0.29653	7.8269	0.29653	3.3059
	0.26514	8.7015	0.26514	5.0449				0.29681	7.8215	0.29681	3.315
	0.26542	8.6932	0.26542	5.0625				0.29708	7.8161	0.29708	3.3241
	0.26569	8.6849	0.26569	5.0803				0.29736	7.8108	0.29736	3.3333
	0.26597	8.6766	0.26597	5.0981				0.29764	7.8054	0.29764	3.3425
	0.26625	8.6684	0.26625	5.116				0.29792	7.8001	0.29792	3.3517
	0.26653	8.6602	0.26653	5.1339				0.29819	7.7947	0.29819	3.361
	0.26681	8.652	0.26681	5.152				0.29847	7.7894	0.29847	3.3703
	0.26708	8.6438	0.26708	5.17				0.29875	7.7841	0.29875	3.3796
	0.26736	8.6357	0.26736	5.1882				0.29903	7.7788	0.29903	3.3889
	0.26764	8.6275	0.26764	5.2064				0.29931	7.7735	0.29931	3.3983
	0.26792	8.6194	0.26792	5.2247				0.29958	7.7682	0.29958	3.4077
	0.26819	8.6113	0.26819	5.2431				0.29986	7.763	0.29986	3.4171
	0.26847	8.6032	0.26847	5.2615				0.30014	7.7577	0.30014	3.4265
	0.26875	8.5952	0.26875	5.28				0.30042	7.7525	0.30042	3.436
	0.26903	8.5871	0.26903	5.2986				0.30069	7.7472	0.30069	3.4455
	0.26931	8.5791	0.26931	5.3172				0.30097	7.742	0.30097	3.455
	0.26958	8.5711	0.26958	5.336				0.30125	7.7368	0.30125	3.4646
	0.26986	8.5631	0.26986	5.3547				0.30153	7.7316	0.30153	3.4742
	0.27014	8.5552	0.27014	5.3736				0.30181	7.7264	0.30181	3.4838
	0.27042	8.5472	0.27042	5.3925				0.30208	7.7212	0.30208	3.4934
	0.27069	8.5393	0.27069	5.4115				0.30236	7.7161	0.30236	3.5031
	0.27097	8.5314	0.27097	5.4306				0.30264	7.7109	0.30264	3.5128
	0.27125	8.5235	0.27125	5.4497				0.30292	7.7058	0.30292	3.5225
	0.27153	8.5156	0.27153	5.4689				0.30319	7.7006	0.30319	3.5323
	0.27181	8.5078	0.27181	5.4882				0.30347	7.6955	0.30347	3.5421
	0.27208	8.4999	0.27208	5.5076				0.30375	7.6904	0.30375	3.5519
	0.27236	8.4921	0.27236	5.527				0.30403	7.6853	0.30403	3.5617
	0.27264	8.4843	0.27264	5.5465				0.30431	7.6802	0.30431	3.5716
	0.27292	8.4766	0.27292	5.5661				0.30458	7.6751	0.30458	3.5815
	0.27319	8.4688	0.27319	5.5857				0.30486	7.67	0.30486	3.5914
	0.27347	8.4611	0.27347	5.6055				0.30514	7.665	0.30514	3.6014
	0.27375	8.4534	0.27375	5.6253				0.30542	7.6599	0.30542	3.6114
	0.27403	8.4457	0.27403	5.6451				0.30569	7.6549	0.30569	3.6214
	0.27431	8.438	0.27431	5.6651				0.30597	7.6498	0.30597	3.6314
	0.27458	8.4303	0.27458	5.6851				0.30625	7.6448	0.30625	3.6415
	0.27486	8.4227	0.27486	5.7052				0.30653	7.6398	0.30653	3.6516
	0.27514	8.415	0.27514	5.7254				0.30681	7.6348	0.30681	3.6617
	0.27542	8.4074	0.27542	5.7456				0.30708	7.6298	0.30708	3.6719
	0.27569	8.3998	0.27569	5.7659				0.30736	7.6248	0.30736	3.6821
	0.27597	8.3922	0.27597	5.7863				0.30764	7.6198	0.30764	3.6923
	0.27625	8.3847	0.27625	5.8068				0.30792	7.6149	0.30792	3.7025
	0.27653	8.3772	0.27653	5.8274				0.30819	7.6099	0.30819	3.7128
	0.27681	8.3696	0.27681	5.848				0.30847	7.605	0.30847	3.7231
	0.27708	8.3621	0.27708	5.8687				0.30875	7.6	0.30875	3.7335
	0.27736	8.3546	0.27736	5.8895				0.30903	7.5951	0.30903	3.7439
	0.27764	8.3472	0.27764	5.9104				0.30931	7.5902	0.30931	3.7543
	0.27792	8.3397	0.27792	5.9313				0.30958	7.5853	0.30958	3.7647
	0.27819	8.3323	0.27819	5.9523				0.30986	7.5804	0.30986	3.7752
	0.27847	8.3249	0.27847	5.9734				0.31014	7.5755	0.31014	3.7857
	0.27875	8.3175	0.27875	5.9946				0.31042	7.5707	0.31042	3.7962
	0.27903	8.3101	0.27903	6.0158				0.31069	7.5658	0.31069	3.8067
	0.27931	8.3028	0.27931	6.0372				0.31097	7.5609	0.31097	3.8173
	0.27958	8.2954	0.27958	6.0586				0.31125	7.5561	0.31125	3.828
	0.27986	8.2881	0.27986	6.0801				0.31153	7.5513	0.31153	3.8386
	0.28014	8.2808	0.28014	6.1017				0.31181	7.5464	0.31181	3.8493
	0.28042	8.2735	0.28042	6.1233				0.31208	7.5416	0.31208	3.86
	0.28069	8.2662	0.28069	6.1451				0.31236	7.5368	0.31236	3.8707
	0.28097	8.259	0.28097	6.1669				0.31264	7.532	0.31264	3.8815
	0.28125	8.2518	0.28125	6.1888				0.31292	7.5272	0.31292	3.8923
	0.28153	8.2445	0.28153	6.2107				0.31319	7.5225	0.31319	3.9032
	0.28181	8.2373	0.28181	6.2328				0.31347	7.5177	0.31347	3.914
	0.28208	8.2302	0.28208	6.2549				0.31375	7.513	0.31375	3.925
	0.28236	8.223	0.28236	6.2771				0.31403	7.5082	0.31403	3.9359
	0.28264	8.2158	0.28264	6.2994				0.31431	7.5035	0.31431	3.9469
	0.28292	8.2087	0.28292	6.3218				0.31458	7.4988	0.31458	3.9579
	0.28319	8.2016	0.28319	6.3443				0.31486	7.494	0.31486	3.9689
	0.28347	8.1945	0.28347	6.3668				0.31514	7.4893	0.31514	3.98
	0.28375	8.1874	0.28375	6.3895				0.31542	7.4846	0.31542	3.9911
	0.28403	8.1803	0.28403	6.4122				0.31569	7.48	0.31569	4.0022
	0.28431	8.1733	0.28431	6.435				0.31597	7.4753	0.31597	4.0134
	0.28458	8.1663	0.28458	6.4578				0.31625	7.4706	0.31625	4.0246
	0.28486	8.1593	0.28486	6.4808				0.31653	7.466	0.31653	4.0358
	0.28514	8.1523	0.28514	6.5038				0.31681	7.4613	0.31681	4.047
	0.28542	8.1453	0.28542	6.527				0.31708	7.4567	0.31708	4.0583
	0.28569	8.1383	0.28569	6.5502				0.31736	7.452	0.31736	4.0697
	0.28597	8.1314	0.28597	6.5735				0.31764	7.4474	0.31764	4.081
	0.28625	8.1244	0.28625	6.5969				0.31792	7.4428	0.31792	4.0924
	0.28653	8.1175	0.28653	6.6203				0.31819	7.4382	0.31819	4.1039
	0.28681	8.1106	0.28681	6.6439				0.31847	7.4336	0.31847	4.1153
	0.28708	8.1038	0.28708	6.6675				0.31875	7.429	0.31875	4.1268
	0.28736	8.0969	0.28736	6.6912				0.31903	7.4245	0.31903	4.1384
	0.28764	8.09	0.28764	6.715				0.31931	7.4199	0.31931	4.1499
	0.28792	8.0832	0.28792	6.7389				0.31958	7.4153	0.31958	4.1615
	0.28819	8.0764	0.28819	6.7629				0.31986	7.4108	0.31986	4.1732
	0.28847	8.0696	0.28847	6.787				0.32014	7.4063	0.32014	4.1848
	0.28875	8.0628	0.28875	6.8111				0.32042	7.4017	0.32042	4.1965
	0.28903	8.0561	0.28903	6.8353				0.32069	7.3972	0.32069	4.2083
	0.28931	8.0493	0.28931	6.8597				0.32097	7.3927	0.32097	4.2201
	0.28958	8.0426	0.28958	6.8841				0.32125	7.3882	0.32125	4.2319
	0.28986	8.0359	0.28986	6.9085				0.32153	7.3837	0.32153	4.2437
	0.29014	8.0292	0.29014	6.9331				0.32181	7.3792	0.32181	4.2556
	0.29042	8.0225	0.29042	6.9578				0.32208	7.3748	0.32208	4.2675
	0.29069	8.0158	0.29069	6.9825				0.32236	7.3703	0.32236	4.2795
	0.29097	8.0092	0.29097	7.0074				0.32264	7.3659	0.32264	4.2914
	0.29125	8.0025	0.29125	7.0323				0.32292	7.3614	0.32292	4.3035
	0.29153	7.9959	0.29153	7.0573				0.32319	7.357	0.32319	4.3155
	0.29181	7.9893	0.29181	7.0824				0.32347	7.3526	0.32347	4.3276
	0.29208	7.9827	0.29208	7.1076				0.32375	7.3481	0.32375	4.3397
	0.29236	7.9761	0.29236	7.1328				0.32403	7.3437	0.32403	4.3519
	0.29264	7.9696	0.29264	7.1582				0.32431	7.3393	0.32431	4.3641
	0.29292	7.9631	0.29292	7.1836				0.32458	7.3349	0.32458	4.3764
	0.29319	7.9565	0.29319	7.2092				0.32486	7.3306	0.32486	4.3886
	0.29347	7.95	0.29347	7.2348				0.32514	7.3262	0.32514	4.4009
	0.29375	7.9435	0.29375	7.2605				0.32542	7.3218	0.32542	4.4133
	0.29403	7.937	0.29403	7.2863				0.32569	7.3175	0.32569	4.4257
	0.29431	7.9306	0.29431	7.3122				0.32597	7.3131	0.32597	4.4381
	0.29458	7.9241	0.29458	7.3381				0.32625	7.3088	0.32625	4.4506
	0.29486	7.9177	0.29486	7.3642				0.32653	7.3045	0.32653	4.4631
	0.29514	7.9113	0.29514	7.3903				0.32681	7.3001	0.32681	4.4756
	0.29542	7.9049	0.29542	7.4165				0.32708	7.2958	0.32708	4.4882
	0.29569	7.8985	0.29569	7.4429				0.32736	7.2915	0.32736	4.5008
	0.29597	7.8921	0.29597	7.4693				0.32764	7.2873	0.32764	4.5134
	0.29625	7.8858	0.29625	7.4958				0.32792	7.283	0.32792	4.5261
	0.29653	7.8794	0.29653	7.5224				0.32819	7.2787	0.32819	4.5388
	0.29681	7.8731	0.29681	7.549				0.32847	7.2744	0.32847	4.5516
	0.29708	7.8668	0.29708	7.5758				0.32875	7.2702	0.32875	4.5644
	0.29736	7.8605	0.29736	7.6026				0.32903	7.2659	0.32903	4.5772
	0.29764	7.8542	0.29764	7.6296				0.32931	7.2617	0.32931	4.5901
	0.29792	7.848	0.29792	7.6566				0.32958	7.2574	0.32958	4.603
	0.29819	7.8417	0.29819	7.6837				0.32986	7.2532	0.32986	4.6159
	0.29847	7.8355	0.29847	7.7109				0.33014	7.249	0.33014	4.6289
	0.29875	7.8292	0.29875	7.7382				0.33042	7.2448	0.33042	4.6419
	0.29903	7.823	0.29903	7.7656				0.33069	7.2406	0.33069	4.655
	0.29931	7.8169	0.29931	7.7931				0.33097	7.2364	0.33097	4.6681
	0.29958	7.8107	0.29958	7.8207				0.33125	7.2322	0.33125	4.6812
	0.29986	7.8045	0.29986	7.8483				0.33153	7.2281	0.33153	4.6944
	0.30014	7.7984	0.30014	7.876				0.33181	7.2239	0.33181	4.7076
	0.30042	7.7922	0.30042	7.9039				0.33208	7.2198	0.33208	4.7209
	0.30069	7.7861	0.30069	7.9318				0.33236	7.2156	0.33236	4.7342
	0.30097	7.78	0.30097	7.9598				0.33264	7.2115	0.33264	4.7475
	0.30125	7.7739	0.30125	7.9879				0.33292	7.2073	0.33292	4.7609
	0.30153	7.7678	0.30153	8.0161				0.33319	7.2032	0.33319	4.7743
	0.30181	7.7618	0.30181	8.0444				0.33347	7.1991	0.33347	4.7878
	0.30208	7.7557	0.30208	8.0727				0.33375	7.195	0.33375	4.8013
	0.30236	7.7497	0.30236	8.1012				0.33403	7.1909	0.33403	4.8148
	0.30264	7.7437	0.30264	8.1297				0.33431	7.1868	0.33431	4.8284
	0.30292	7.7377	0.30292	8.1584				0.33458	7.1828	0.33458	4.842
	0.30319	7.7317	0.30319	8.1871				0.33486	7.1787	0.33486	4.8557
	0.30347	7.7257	0.30347	8.2159				0.33514	7.1746	0.33514	4.8694
	0.30375	7.7198	0.30375	8.2448				0.33542	7.1706	0.33542	4.8831
	0.30403	7.7138	0.30403	8.2738				0.33569	7.1665	0.33569	4.8969
	0.30431	7.7079	0.30431	8.3029				0.33597	7.1625	0.33597	4.9107
	0.30458	7.702	0.30458	8.3321				0.33625	7.1585	0.33625	4.9246
	0.30486	7.6961	0.30486	8.3613				0.33653	7.1544	0.33653	4.9385
	0.30514	7.6902	0.30514	8.3907				0.33681	7.1504	0.33681	4.9524
	0.30542	7.6843	0.30542	8.4201				0.33708	7.1464	0.33708	4.9664
	0.30569	7.6784	0.30569	8.4496				0.33736	7.1424	0.33736	4.9805
	0.30597	7.6726	0.30597	8.4792				0.33764	7.1384	0.33764	4.9945
	0.30625	7.6668	0.30625	8.5089				0.33792	7.1345	0.33792	5.0087
	0.30653	7.6609	0.30653	8.5387				0.33819	7.1305	0.33819	5.0228
	0.30681	7.6551	0.30681	8.5686				0.33847	7.1265	0.33847	5.037
	0.30708	7.6494	0.30708	8.5986				0.33875	7.1226	0.33875	5.0512
	0.30736	7.6436	0.30736	8.6286				0.33903	7.1186	0.33903	5.0655
	0.30764	7.6378	0.30764	8.6588				0.33931	7.1147	0.33931	5.0799
	0.30792	7.6321	0.30792	8.689				0.33958	7.1108	0.33958	5.0942
	0.30819	7.6263	0.30819	8.7194				0.33986	7.1068	0.33986	5.1086
	0.30847	7.6206	0.30847	8.7498				0.34014	7.1029	0.34014	5.1231
	0.30875	7.6149	0.30875	8.7803				0.34042	7.099	0.34042	5.1376
	0.30903	7.6092	0.30903	8.8109				0.34069	7.0951	0.34069	5.1521
	0.30931	7.6035	0.30931	8.8416				0.34097	7.0912	0.34097	5.1667
	0.30958	7.5979	0.30958	8.8723				0.34125	7.0873	0.34125	5.1813
	0.30986	7.5922	0.30986	8.9032				0.34153	7.0835	0.34153	5.196
	0.31014	7.5866	0.31014	8.9342				0.34181	7.0796	0.34181	5.2107
	0.31042	7.581	0.31042	8.9652				0.34208	7.0757	0.34208	5.2255
	0.31069	7.5754	0.31069	8.9963				0.34236	7.0719	0.34236	5.2403
	0.31097	7.5698	0.31097	9.0275				0.34264	7.068	0.34264	5.2551
	0.31125	7.5642	0.31125	9.0588				0.34292	7.0642	0.34292	5.27
	0.31153	7.5586	0.31153	9.0902				0.34319	7.0604	0.34319	5.2849
	0.31181	7.5531	0.31181	9.1217				0.34347	7.0566	0.34347	5.2999
	0.31208	7.5475	0.31208	9.1533				0.34375	7.0528	0.34375	5.3149
	0.31236	7.542	0.31236	9.1849				0.34403	7.0489	0.34403	5.33
	0.31264	7.5365	0.31264	9.2167				0.34431	7.0452	0.34431	5.3451
	0.31292	7.531	0.31292	9.2485				0.34458	7.0414	0.34458	5.3603
	0.31319	7.5255	0.31319	9.2804				0.34486	7.0376	0.34486	5.3755
	0.31347	7.52	0.31347	9.3124				0.34514	7.0338	0.34514	5.3907
	0.31375	7.5145	0.31375	9.3445				0.34542	7.03	0.34542	5.406
	0.31403	7.5091	0.31403	9.3767				0.34569	7.0263	0.34569	5.4213
	0.31431	7.5036	0.31431	9.409				0.34597	7.0225	0.34597	5.4367
	0.31458	7.4982	0.31458	9.4413				0.34625	7.0188	0.34625	5.4521
	0.31486	7.4928	0.31486	9.4737				0.34653	7.0151	0.34653	5.4676
	0.31514	7.4874	0.31514	9.5063				0.34681	7.0113	0.34681	5.4831
	0.31542	7.482	0.31542	9.5389				0.34708	7.0076	0.34708	5.4987
	0.31569	7.4767	0.31569	9.5716				0.34736	7.0039	0.34736	5.5143
	0.31597	7.4713	0.31597	9.6044				0.34764	7.0002	0.34764	5.5299
	0.31625	7.4659	0.31625	9.6372				0.34792	6.9965	0.34792	5.5457
	0.31653	7.4606	0.31653	9.6702				0.34819	6.9928	0.34819	5.5614
	0.31681	7.4553	0.31681	9.7032				0.34847	6.9891	0.34847	5.5772
	0.31708	7.45	0.31708	9.7363				0.34875	6.9855	0.34875	5.593
	0.31736	7.4447	0.31736	9.7695				0.34903	6.9818	0.34903	5.6089
	0.31764	7.4394	0.31764	9.8028				0.34931	6.9781	0.34931	5.6249
	0.31792	7.4341	0.31792	9.8362				0.34958	6.9745	0.34958	5.6409
	0.31819	7.4289	0.31819	9.8697				0.34986	6.9708	0.34986	5.6569
	0.31847	7.4236	0.31847	9.9032				0.35014	6.9672	0.35014	5.673
	0.31875	7.4184	0.31875	9.9369				0.35042	6.9636	0.35042	5.6891
	0.31903	7.4132	0.31903	9.9706				0.35069	6.9599	0.35069	5.7052
	0.31931	7.408	0.31931	10.0044				0.35097	6.9563	0.35097	5.7215
	0.31958	7.4028	0.31958	10.0382				0.35125	6.9527	0.35125	5.7377
	0.31986	7.3976	0.31986	10.0722				0.35153	6.9491	0.35153	5.7541
	0.32014	7.3924	0.32014	10.1062				0.35181	6.9455	0.35181	5.7704
	0.32042	7.3873	0.32042	10.1404				0.35208	6.9419	0.35208	5.7868
	0.32069	7.3821	0.32069	10.1746				0.35236	6.9384	0.35236	5.8033
	0.32097	7.377	0.32097	10.2089				0.35264	6.9348	0.35264	5.8198
	0.32125	7.3718	0.32125	10.2432				0.35292	6.9312	0.35292	5.8363
	0.32153	7.3667	0.32153	10.2777				0.35319	6.9277	0.35319	5.8529
	0.32181	7.3616	0.32181	10.3122				0.35347	6.9241	0.35347	5.8696
	0.32208	7.3565	0.32208	10.3468				0.35375	6.9206	0.35375	5.8863
	0.32236	7.3515	0.32236	10.3815				0.35403	6.9171	0.35403	5.903
	0.32264	7.3464	0.32264	10.4163				0.35431	6.9135	0.35431	5.9198
	0.32292	7.3414	0.32292	10.4512				0.35458	6.91	0.35458	5.9367
	0.32319	7.3363	0.32319	10.4861				0.35486	6.9065	0.35486	5.9536
	0.32347	7.3313	0.32347	10.5211				0.35514	6.903	0.35514	5.9705
	0.32375	7.3263	0.32375	10.5562				0.35542	6.8995	0.35542	5.9875
	0.32403	7.3213	0.32403	10.5914				0.35569	6.896	0.35569	6.0045
	0.32431	7.3163	0.32431	10.6267				0.35597	6.8925	0.35597	6.0216
	0.32458	7.3113	0.32458	10.662				0.35625	6.889	0.35625	6.0388
	0.32486	7.3063	0.32486	10.6974				0.35653	6.8856	0.35653	6.056
	0.32514	7.3014	0.32514	10.7329				0.35681	6.8821	0.35681	6.0732
	0.32542	7.2965	0.32542	10.7685				0.35708	6.8787	0.35708	6.0905
	0.32569	7.2915	0.32569	10.8041				0.35736	6.8752	0.35736	6.1078
	0.32597	7.2866	0.32597	10.8398				0.35764	6.8718	0.35764	6.1252
	0.32625	7.2817	0.32625	10.8756				0.35792	6.8683	0.35792	6.1427
	0.32653	7.2768	0.32653	10.9115				0.35819	6.8649	0.35819	6.1602
	0.32681	7.2719	0.32681	10.9474				0.35847	6.8615	0.35847	6.1777
	0.32708	7.2671	0.32708	10.9834				0.35875	6.8581	0.35875	6.1953
	0.32736	7.2622	0.32736	11.0195				0.35903	6.8547	0.35903	6.2129
	0.32764	7.2573	0.32764	11.0557				0.35931	6.8513	0.35931	6.2306
	0.32792	7.2525	0.32792	11.0919				0.35958	6.8479	0.35958	6.2483
	0.32819	7.2477	0.32819	11.1282				0.35986	6.8445	0.35986	6.2661
	0.32847	7.2429	0.32847	11.1646				0.36014	6.8411	0.36014	6.284
	0.32875	7.2381	0.32875	11.2011				0.36042	6.8377	0.36042	6.3019
	0.32903	7.2333	0.32903	11.2376				0.36069	6.8344	0.36069	6.3198
	0.32931	7.2285	0.32931	11.2742				0.36097	6.831	0.36097	6.3378
	0.32958	7.2237	0.32958	11.3109				0.36125	6.8277	0.36125	6.3558
	0.32986	7.219	0.32986	11.3476				0.36153	6.8243	0.36153	6.3739
	0.33014	7.2142	0.33014	11.3844				0.36181	6.821	0.36181	6.3921
	0.33042	7.2095	0.33042	11.4213				0.36208	6.8176	0.36208	6.4103
	0.33069	7.2048	0.33069	11.4583				0.36236	6.8143	0.36236	6.4285
	0.33097	7.2001	0.33097	11.4953				0.36264	6.811	0.36264	6.4468
	0.33125	7.1954	0.33125	11.5324				0.36292	6.8077	0.36292	6.4652
	0.33153	7.1907	0.33153	11.5696				0.36319	6.8044	0.36319	6.4836
	0.33181	7.186	0.33181	11.6068				0.36347	6.8011	0.36347	6.502
	0.33208	7.1813	0.33208	11.6442				0.36375	6.7978	0.36375	6.5205
	0.33236	7.1767	0.33236	11.6815				0.36403	6.7945	0.36403	6.5391
	0.33264	7.172	0.33264	11.719				0.36431	6.7912	0.36431	6.5577
	0.33292	7.1674	0.33292	11.7565				0.36458	6.788	0.36458	6.5763
	0.33319	7.1628	0.33319	11.794				0.36486	6.7847	0.36486	6.595
	0.33347	7.1582	0.33347	11.8317				0.36514	6.7814	0.36514	6.6138
	0.33375	7.1536	0.33375	11.8694				0.36542	6.7782	0.36542	6.6326
	0.33403	7.149	0.33403	11.9072				0.36569	6.7749	0.36569	6.6514
	0.33431	7.1444	0.33431	11.945				0.36597	6.7717	0.36597	6.6704
	0.33458	7.1398	0.33458	11.9829				0.36625	6.7685	0.36625	6.6893
	0.33486	7.1353	0.33486	12.0208				0.36653	6.7652	0.36653	6.7083
	0.33514	7.1307	0.33514	12.0589				0.36681	6.762	0.36681	6.7274
	0.33542	7.1262	0.33542	12.0969				0.36708	6.7588	0.36708	6.7465
	0.33569	7.1217	0.33569	12.1351				0.36736	6.7556	0.36736	6.7657
	0.33597	7.1172	0.33597	12.1733				0.36764	6.7524	0.36764	6.7849
	0.33625	7.1126	0.33625	12.2116				0.36792	6.7492	0.36792	6.8041
	0.33653	7.1082	0.33653	12.2499				0.36819	6.746	0.36819	6.8235
	0.33681	7.1037	0.33681	12.2883				0.36847	6.7429	0.36847	6.8428
	0.33708	7.0992	0.33708	12.3267				0.36875	6.7397	0.36875	6.8622
	0.33736	7.0947	0.33736	12.3652				0.36903	6.7365	0.36903	6.8817
	0.33764	7.0903	0.33764	12.4038				0.36931	6.7334	0.36931	6.9012
	0.33792	7.0858	0.33792	12.4424				0.36958	6.7302	0.36958	6.9208
	0.33819	7.0814	0.33819	12.4811				0.36986	6.7271	0.36986	6.9404
	0.33847	7.077	0.33847	12.5198				0.37014	6.7239	0.37014	6.9601
	0.33875	7.0726	0.33875	12.5586				0.37042	6.7208	0.37042	6.9798
	0.33903	7.0682	0.33903	12.5974				0.37069	6.7177	0.37069	6.9996
	0.33931	7.0638	0.33931	12.6363				0.37097	6.7145	0.37097	7.0194
	0.33958	7.0594	0.33958	12.6753				0.37125	6.7114	0.37125	7.0393
	0.33986	7.0551	0.33986	12.7143				0.37153	6.7083	0.37153	7.0592
	0.34014	7.0507	0.34014	12.7533				0.37181	6.7052	0.37181	7.0792
	0.34042	7.0464	0.34042	12.7925				0.37208	6.7021	0.37208	7.0993
	0.34069	7.042	0.34069	12.8316				0.37236	6.699	0.37236	7.1194
	0.34097	7.0377	0.34097	12.8708				0.37264	6.6959	0.37264	7.1395
	0.34125	7.0334	0.34125	12.9101				0.37292	6.6929	0.37292	7.1597
	0.34153	7.0291	0.34153	12.9494				0.37319	6.6898	0.37319	7.1799
	0.34181	7.0248	0.34181	12.9888				0.37347	6.6867	0.37347	7.2002
	0.34208	7.0205	0.34208	13.0282				0.37375	6.6837	0.37375	7.2206
	0.34236	7.0162	0.34236	13.0677				0.37403	6.6806	0.37403	7.241
	0.34264	7.012	0.34264	13.1072				0.37431	6.6776	0.37431	7.2614
	0.34292	7.0077	0.34292	13.1467				0.37458	6.6745	0.37458	7.2819
	0.34319	7.0035	0.34319	13.1863				0.37486	6.6715	0.37486	7.3025
	0.34347	6.9993	0.34347	13.226				0.37514	6.6685	0.37514	7.3231
	0.34375	6.995	0.34375	13.2657				0.37542	6.6655	0.37542	7.3437
	0.34403	6.9908	0.34403	13.3054				0.37569	6.6624	0.37569	7.3644
	0.34431	6.9866	0.34431	13.3452				0.37597	6.6594	0.37597	7.3852
	0.34458	6.9824	0.34458	13.385				0.37625	6.6564	0.37625	7.406
	0.34486	6.9782	0.34486	13.4249				0.37653	6.6534	0.37653	7.4269
	0.34514	6.9741	0.34514	13.4648				0.37681	6.6504	0.37681	7.4478
	0.34542	6.9699	0.34542	13.5047				0.37708	6.6475	0.37708	7.4687
	0.34569	6.9658	0.34569	13.5447				0.37736	6.6445	0.37736	7.4897
	0.34597	6.9616	0.34597	13.5847				0.37764	6.6415	0.37764	7.5108
	0.34625	6.9575	0.34625	13.6248				0.37792	6.6385	0.37792	7.5319
	0.34653	6.9533	0.34653	13.6649				0.37819	6.6356	0.37819	7.5531
	0.34681	6.9492	0.34681	13.705				0.37847	6.6326	0.37847	7.5743
	0.34708	6.9451	0.34708	13.7452				0.37875	6.6297	0.37875	7.5956
	0.34736	6.941	0.34736	13.7854				0.37903	6.6267	0.37903	7.6169
	0.34764	6.937	0.34764	13.8257				0.37931	6.6238	0.37931	7.6383
	0.34792	6.9329	0.34792	13.866				0.37958	6.6209	0.37958	7.6597
	0.34819	6.9288	0.34819	13.9063				0.37986	6.618	0.37986	7.6812
	0.34847	6.9248	0.34847	13.9466				0.38014	6.615	0.38014	7.7027
	0.34875	6.9207	0.34875	13.987				0.38042	6.6121	0.38042	7.7243
	0.34903	6.9167	0.34903	14.0274				0.38069	6.6092	0.38069	7.7459
	0.34931	6.9127	0.34931	14.0679				0.38097	6.6063	0.38097	7.7676
	0.34958	6.9086	0.34958	14.1084				0.38125	6.6034	0.38125	7.7893
	0.34986	6.9046	0.34986	14.1489				0.38153	6.6005	0.38153	7.8111
	0.35014	6.9006	0.35014	14.1894				0.38181	6.5976	0.38181	7.8329
	0.35042	6.8966	0.35042	14.2299				0.38208	6.5948	0.38208	7.8548
	0.35069	6.8927	0.35069	14.2705				0.38236	6.5919	0.38236	7.8767
	0.35097	6.8887	0.35097	14.3112				0.38264	6.589	0.38264	7.8987
	0.35125	6.8847	0.35125	14.3518				0.38292	6.5862	0.38292	7.9208
	0.35153	6.8808	0.35153	14.3925				0.38319	6.5833	0.38319	7.9428
	0.35181	6.8768	0.35181	14.4332				0.38347	6.5805	0.38347	7.965
	0.35208	6.8729	0.35208	14.4739				0.38375	6.5776	0.38375	7.9872
	0.35236	6.869	0.35236	14.5146				0.38403	6.5748	0.38403	8.0094
	0.35264	6.8651	0.35264	14.5554				0.38431	6.572	0.38431	8.0317
	0.35292	6.8612	0.35292	14.5962				0.38458	6.5691	0.38458	8.0541
	0.35319	6.8573	0.35319	14.637				0.38486	6.5663	0.38486	8.0764
	0.35347	6.8534	0.35347	14.6778				0.38514	6.5635	0.38514	8.0989
	0.35375	6.8495	0.35375	14.7187				0.38542	6.5607	0.38542	8.1214
	0.35403	6.8456	0.35403	14.7596				0.38569	6.5579	0.38569	8.1439
	0.35431	6.8418	0.35431	14.8004				0.38597	6.5551	0.38597	8.1665
	0.35458	6.8379	0.35458	14.8413				0.38625	6.5523	0.38625	8.1891
	0.35486	6.8341	0.35486	14.8822				0.38653	6.5495	0.38653	8.2118
	0.35514	6.8302	0.35514	14.9232				0.38681	6.5467	0.38681	8.2346
	0.35542	6.8264	0.35542	14.9641				0.38708	6.544	0.38708	8.2573
	0.35569	6.8226	0.35569	15.0051				0.38736	6.5412	0.38736	8.2802
	0.35597	6.8188	0.35597	15.046				0.38764	6.5384	0.38764	8.3031
	0.35625	6.815	0.35625	15.087				0.38792	6.5357	0.38792	8.326
	0.35653	6.8112	0.35653	15.128				0.38819	6.5329	0.38819	8.349
	0.35681	6.8074	0.35681	15.169				0.38847	6.5302	0.38847	8.372
	0.35708	6.8037	0.35708	15.21				0.38875	6.5274	0.38875	8.3951
	0.35736	6.7999	0.35736	15.251				0.38903	6.5247	0.38903	8.4182
	0.35764	6.7962	0.35764	15.292				0.38931	6.522	0.38931	8.4414
	0.35792	6.7924	0.35792	15.3331				0.38958	6.5192	0.38958	8.4647
	0.35819	6.7887	0.35819	15.3741				0.38986	6.5165	0.38986	8.4879
	0.35847	6.785	0.35847	15.4152				0.39014	6.5138	0.39014	8.5113
	0.35875	6.7812	0.35875	15.4562				0.39042	6.5111	0.39042	8.5346
	0.35903	6.7775	0.35903	15.4973				0.39069	6.5084	0.39069	8.5581
	0.35931	6.7738	0.35931	15.5383				0.39097	6.5057	0.39097	8.5815
	0.35958	6.7702	0.35958	15.5794				0.39125	6.503	0.39125	8.6051
	0.35986	6.7665	0.35986	15.6204				0.39153	6.5003	0.39153	8.6286
	0.36014	6.7628	0.36014	15.6615				0.39181	6.4976	0.39181	8.6523
	0.36042	6.7591	0.36042	15.7025				0.39208	6.495	0.39208	8.6759
	0.36069	6.7555	0.36069	15.7436				0.39236	6.4923	0.39236	8.6996
	0.36097	6.7518	0.36097	15.7846				0.39264	6.4896	0.39264	8.7234
	0.36125	6.7482	0.36125	15.8256				0.39292	6.487	0.39292	8.7472
	0.36153	6.7446	0.36153	15.8666				0.39319	6.4843	0.39319	8.7711
	0.36181	6.7409	0.36181	15.9115				0.39347	6.4817	0.39347	8.795
	0.36208	6.7373	0.36208	15.962				0.39375	6.479	0.39375	8.8189
	0.36236	6.7337	0.36236	16.0139				0.39403	6.4764	0.39403	8.8429
	0.36264	6.7301	0.36264	16.0658				0.39431	6.4738	0.39431	8.867
	0.36292	6.7265	0.36292	16.1175				0.39458	6.4712	0.39458	8.8911
	0.36319	6.723	0.36319	16.1692				0.39486	6.4685	0.39486	8.9152
	0.36347	6.7194	0.36347	16.2207				0.39514	6.4659	0.39514	8.9394
	0.36375	6.7158	0.36375	16.2722				0.39542	6.4633	0.39542	8.9636
	0.36403	6.7123	0.36403	16.3235				0.39569	6.4607	0.39569	8.9879
	0.36431	6.7087	0.36431	16.3747				0.39597	6.4581	0.39597	9.0122
	0.36458	6.7052	0.36458	16.4259				0.39625	6.4555	0.39625	9.0366
	0.36486	6.7017	0.36486	16.4769				0.39653	6.4529	0.39653	9.061
	0.36514	6.6982	0.36514	16.5278				0.39681	6.4503	0.39681	9.0855
	0.36542	6.6947	0.36542	16.5786				0.39708	6.4478	0.39708	9.11
	0.36569	6.6912	0.36569	16.6293				0.39736	6.4452	0.39736	9.1345
	0.36597	6.6877	0.36597	16.6798				0.39764	6.4426	0.39764	9.1591
	0.36625	6.6842	0.36625	16.7303				0.39792	6.44	0.39792	9.1838
	0.36653	6.6807	0.36653	16.7806				0.39819	6.4375	0.39819	9.2085
	0.36681	6.6772	0.36681	16.8308				0.39847	6.4349	0.39847	9.2332
	0.36708	6.6738	0.36708	16.8809				0.39875	6.4324	0.39875	9.258
	0.36736	6.6703	0.36736	16.9309				0.39903	6.4298	0.39903	9.2828
	0.36764	6.6669	0.36764	16.9808				0.39931	6.4273	0.39931	9.3077
	0.36792	6.6634	0.36792	17.0305				0.39958	6.4248	0.39958	9.3326
	0.36819	6.66	0.36819	17.0801				0.39986	6.4222	0.39986	9.3575
	0.36847	6.6566	0.36847	17.1296				0.40014	6.4197	0.40014	9.3825
	0.36875	6.6532	0.36875	17.179				0.40042	6.4172	0.40042	9.4075
	0.36903	6.6498	0.36903	17.2282				0.40069	6.4147	0.40069	9.4326
	0.36931	6.6464	0.36931	17.2773				0.40097	6.4122	0.40097	9.4578
	0.36958	6.643	0.36958	17.3262				0.40125	6.4097	0.40125	9.4829
	0.36986	6.6396	0.36986	17.3751				0.40153	6.4072	0.40153	9.5081
	0.37014	6.6362	0.37014	17.4238				0.40181	6.4047	0.40181	9.5334
	0.37042	6.6329	0.37042	17.4723				0.40208	6.4022	0.40208	9.5587
	0.37069	6.6295	0.37069	17.5208				0.40236	6.3997	0.40236	9.5841
	0.37097	6.6262	0.37097	17.5691				0.40264	6.3972	0.40264	9.6094
	0.37125	6.6228	0.37125	17.6173				0.40292	6.3948	0.40292	9.6349
	0.37153	6.6195	0.37153	17.6653				0.40319	6.3923	0.40319	9.6603
	0.37181	6.6161	0.37181	17.7131				0.40347	6.3898	0.40347	9.6859
	0.37208	6.6128	0.37208	17.7609				0.40375	6.3874	0.40375	9.7114
	0.37236	6.6095	0.37236	17.8085				0.40403	6.3849	0.40403	9.737
	0.37264	6.6062	0.37264	17.856				0.40431	6.3825	0.40431	9.7626
	0.37292	6.6029	0.37292	17.9033				0.40458	6.38	0.40458	9.7883
	0.37319	6.5996	0.37319	17.9504				0.40486	6.3776	0.40486	9.814
	0.37347	6.5964	0.37347	17.9974				0.40514	6.3752	0.40514	9.8398
	0.37375	6.5931	0.37375	18.0443				0.40542	6.3727	0.40542	9.8656
	0.37403	6.5898	0.37403	18.091				0.40569	6.3703	0.40569	9.8914
	0.37431	6.5866	0.37431	18.1376				0.40597	6.3679	0.40597	9.9173
	0.37458	6.5833	0.37458	18.184				0.40625	6.3655	0.40625	9.9432
	0.37486	6.5801	0.37486	18.2303				0.40653	6.3631	0.40653	9.9692
	0.37514	6.5768	0.37514	18.2764				0.40681	6.3607	0.40681	9.9952
	0.37542	6.5736	0.37542	18.3224				0.40708	6.3583	0.40708	10.0212
	0.37569	6.5704	0.37569	18.3682				0.40736	6.3559	0.40736	10.0473
	0.37597	6.5672	0.37597	18.4138				0.40764	6.3535	0.40764	10.0734
	0.37625	6.564	0.37625	18.4593				0.40792	6.3511	0.40792	10.0995
	0.37653	6.5608	0.37653	18.5046				0.40819	6.3487	0.40819	10.1257
	0.37681	6.5576	0.37681	18.5498				0.40847	6.3463	0.40847	10.1519
	0.37708	6.5544	0.37708	18.5948				0.40875	6.344	0.40875	10.1782
	0.37736	6.5512	0.37736	18.6396				0.40903	6.3416	0.40903	10.2045
	0.37764	6.5481	0.37764	18.6843				0.40931	6.3392	0.40931	10.2308
	0.37792	6.5449	0.37792	18.7288				0.40958	6.3369	0.40958	10.2572
	0.37819	6.5417	0.37819	18.7732				0.40986	6.3345	0.40986	10.2836
	0.37847	6.5386	0.37847	18.8174				0.41014	6.3322	0.41014	10.31
	0.37875	6.5355	0.37875	18.8614				0.41042	6.3298	0.41042	10.3365
	0.37903	6.5323	0.37903	18.9052				0.41069	6.3275	0.41069	10.363
	0.37931	6.5292	0.37931	18.9489				0.41097	6.3252	0.41097	10.3896
	0.37958	6.5261	0.37958	18.9924				0.41125	6.3229	0.41125	10.4162
	0.37986	6.523	0.37986	19.0357				0.41153	6.3205	0.41153	10.4428
	0.38014	6.5199	0.38014	19.0788				0.41181	6.3182	0.41181	10.4694
	0.38042	6.5168	0.38042	19.1218				0.41208	6.3159	0.41208	10.4961
	0.38069	6.5137	0.38069	19.1646				0.41236	6.3136	0.41236	10.5228
	0.38097	6.5106	0.38097	19.2072				0.41264	6.3113	0.41264	10.5496
	0.38125	6.5076	0.38125	19.2497				0.41292	6.309	0.41292	10.5764
	0.38153	6.5045	0.38153	19.292				0.41319	6.3067	0.41319	10.6032
	0.38181	6.5015	0.38181	19.3341				0.41347	6.3044	0.41347	10.6301
	0.38208	6.4984	0.38208	19.376				0.41375	6.3021	0.41375	10.657
	0.38236	6.4954	0.38236	19.4177				0.41403	6.2998	0.41403	10.6839
	0.38264	6.4923	0.38264	19.4593				0.41431	6.2976	0.41431	10.7108
	0.38292	6.4893	0.38292	19.5006				0.41458	6.2953	0.41458	10.7378
	0.38319	6.4863	0.38319	19.5418				0.41486	6.293	0.41486	10.7648
	0.38347	6.4832	0.38347	19.5828				0.41514	6.2908	0.41514	10.7919
	0.38375	6.4802	0.38375	19.6236				0.41542	6.2885	0.41542	10.819
	0.38403	6.4772	0.38403	19.6642				0.41569	6.2863	0.41569	10.8461
	0.38431	6.4742	0.38431	19.7047				0.41597	6.284	0.41597	10.8732
	0.38458	6.4712	0.38458	19.745				0.41625	6.2818	0.41625	10.9004
	0.38486	6.4682	0.38486	19.785				0.41653	6.2795	0.41653	10.9276
	0.38514	6.4653	0.38514	19.8249				0.41681	6.2773	0.41681	10.9548
	0.38542	6.4623	0.38542	19.8646				0.41708	6.2751	0.41708	10.9821
	0.38569	6.4594	0.38569	19.9041				0.41736	6.2728	0.41736	11.0094
	0.38597	6.4564	0.38597	19.9434				0.41764	6.2706	0.41764	11.0367
	0.38625	6.4535	0.38625	19.9825				0.41792	6.2684	0.41792	11.0641
	0.38653	6.4505	0.38653	20.0214				0.41819	6.2662	0.41819	11.0914
	0.38681	6.4476	0.38681	20.0601				0.41847	6.264	0.41847	11.1188
	0.38708	6.4447	0.38708	20.0987				0.41875	6.2618	0.41875	11.1463
	0.38736	6.4418	0.38736	20.137				0.41903	6.2596	0.41903	11.1737
	0.38764	6.4389	0.38764	20.1751				0.41931	6.2574	0.41931	11.2012
	0.38792	6.436	0.38792	20.2131				0.41958	6.2552	0.41958	11.2287
	0.38819	6.4331	0.38819	20.2509				0.41986	6.253	0.41986	11.2563
	0.38847	6.4302	0.38847	20.2884				0.42014	6.2508	0.42014	11.2838
	0.38875	6.4273	0.38875	20.3258				0.42042	6.2486	0.42042	11.3114
	0.38903	6.4244	0.38903	20.3629				0.42069	6.2464	0.42069	11.339
	0.38931	6.4215	0.38931	20.3998				0.42097	6.2443	0.42097	11.3667
	0.38958	6.4186	0.38958	20.4366				0.42125	6.2421	0.42125	11.3943
	0.38986	6.4158	0.38986	20.4731				0.42153	6.24	0.42153	11.422
	0.39014	6.4129	0.39014	20.5094				0.42181	6.2378	0.42181	11.4497
	0.39042	6.4101	0.39042	20.5455				0.42208	6.2356	0.42208	11.4775
	0.39069	6.4072	0.39069	20.5815				0.42236	6.2335	0.42236	11.5052
	0.39097	6.4044	0.39097	20.6172				0.42264	6.2314	0.42264	11.533
	0.39125	6.4016	0.39125	20.6527				0.42292	6.2292	0.42292	11.5608
	0.39153	6.3988	0.39153	20.688				0.42319	6.2271	0.42319	11.5886
	0.39181	6.396	0.39181	20.7231				0.42347	6.2249	0.42347	11.6165
	0.39208	6.3931	0.39208	20.758				0.42375	6.2228	0.42375	11.6444
	0.39236	6.3903	0.39236	20.7927				0.42403	6.2207	0.42403	11.6723
	0.39264	6.3876	0.39264	20.8271				0.42431	6.2186	0.42431	11.7002
	0.39292	6.3848	0.39292	20.8614				0.42458	6.2165	0.42458	11.7281
	0.39319	6.382	0.39319	20.8954				0.42486	6.2144	0.42486	11.7561
	0.39347	6.3792	0.39347	20.9293				0.42514	6.2122	0.42514	11.784
	0.39375	6.3765	0.39375	20.9629				0.42542	6.2101	0.42542	11.812
	0.39403	6.3737	0.39403	20.9963				0.42569	6.2081	0.42569	11.84
	0.39431	6.371	0.39431	21.0295				0.42597	6.206	0.42597	11.8681
	0.39458	6.3682	0.39458	21.0625				0.42625	6.2039	0.42625	11.8961
	0.39486	6.3655	0.39486	21.0953				0.42653	6.2018	0.42653	11.9242
	0.39514	6.3627	0.39514	21.1279				0.42681	6.1997	0.42681	11.9523
	0.39542	6.36	0.39542	21.1602				0.42708	6.1976	0.42708	11.9804
	0.39569	6.3573	0.39569	21.1924				0.42736	6.1956	0.42736	12.0085
	0.39597	6.3546	0.39597	21.2243				0.42764	6.1935	0.42764	12.0366
	0.39625	6.3519	0.39625	21.256				0.42792	6.1914	0.42792	12.0648
	0.39653	6.3492	0.39653	21.2875				0.42819	6.1894	0.42819	12.0929
	0.39681	6.3465	0.39681	21.3188				0.42847	6.1873	0.42847	12.1211
	0.39708	6.3438	0.39708	21.3498				0.42875	6.1853	0.42875	12.1493
	0.39736	6.3411	0.39736	21.3806				0.42903	6.1832	0.42903	12.1775
	0.39764	6.3384	0.39764	21.4113				0.42931	6.1812	0.42931	12.2057
	0.39792	6.3357	0.39792	21.4417				0.42958	6.1791	0.42958	12.234
	0.39819	6.3331	0.39819	21.4719				0.42986	6.1771	0.42986	12.2622
	0.39847	6.3304	0.39847	21.5018				0.43014	6.1751	0.43014	12.2905
	0.39875	6.3278	0.39875	21.5315				0.43042	6.173	0.43042	12.3224
	0.39903	6.3251	0.39903	21.5611				0.43069	6.171	0.43069	12.3583
	0.39931	6.3225	0.39931	21.5903				0.43097	6.169	0.43097	12.3947
	0.39958	6.3198	0.39958	21.6194				0.43125	6.167	0.43125	12.4311
	0.39986	6.3172	0.39986	21.6483				0.43153	6.165	0.43153	12.4674
	0.40014	6.3146	0.40014	21.6769				0.43181	6.163	0.43181	12.5037
	0.40042	6.312	0.40042	21.7053				0.43208	6.161	0.43208	12.54
	0.40069	6.3094	0.40069	21.7335				0.43236	6.159	0.43236	12.5762
	0.40097	6.3068	0.40097	21.7615				0.43264	6.157	0.43264	12.6124
	0.40125	6.3042	0.40125	21.7892				0.43292	6.155	0.43292	12.6486
	0.40153	6.3016	0.40153	21.8167				0.43319	6.153	0.43319	12.6847
	0.40181	6.299	0.40181	21.844				0.43347	6.151	0.43347	12.7208
	0.40208	6.2964	0.40208	21.871				0.43375	6.149	0.43375	12.7568
	0.40236	6.2938	0.40236	21.8979				0.43403	6.147	0.43403	12.7929
	0.40264	6.2913	0.40264	21.9245				0.43431	6.1451	0.43431	12.8289
	0.40292	6.2887	0.40292	21.9509				0.43458	6.1431	0.43458	12.8648
	0.40319	6.2861	0.40319	21.9771				0.43486	6.1411	0.43486	12.9007
	0.40347	6.2836	0.40347	22.003				0.43514	6.1392	0.43514	12.9366
	0.40375	6.281	0.40375	22.0287				0.43542	6.1372	0.43542	12.9724
	0.40403	6.2785	0.40403	22.0542				0.43569	6.1353	0.43569	13.0082
	0.40431	6.276	0.40431	22.0795				0.43597	6.1333	0.43597	13.044
	0.40458	6.2734	0.40458	22.1046				0.43625	6.1314	0.43625	13.0797
	0.40486	6.2709	0.40486	22.1294				0.43653	6.1294	0.43653	13.1154
	0.40514	6.2684	0.40514	22.154				0.43681	6.1275	0.43681	13.151
	0.40542	6.2659	0.40542	22.1784				0.43708	6.1256	0.43708	13.1866
	0.40569	6.2634	0.40569	22.2025				0.43736	6.1236	0.43736	13.2221
	0.40597	6.2609	0.40597	22.2264				0.43764	6.1217	0.43764	13.2576
	0.40625	6.2584	0.40625	22.2501				0.43792	6.1198	0.43792	13.293
	0.40653	6.2559	0.40653	22.2736				0.43819	6.1179	0.43819	13.3284
	0.40681	6.2534	0.40681	22.2968				0.43847	6.116	0.43847	13.3638
	0.40708	6.251	0.40708	22.3198				0.43875	6.1141	0.43875	13.3991
	0.40736	6.2485	0.40736	22.3426				0.43903	6.1121	0.43903	13.4344
	0.40764	6.246	0.40764	22.3651				0.43931	6.1102	0.43931	13.4696
	0.40792	6.2436	0.40792	22.3874				0.43958	6.1083	0.43958	13.5047
	0.40819	6.2411	0.40819	22.4095				0.43986	6.1065	0.43986	13.5398
	0.40847	6.2387	0.40847	22.4314				0.44014	6.1046	0.44014	13.5749
	0.40875	6.2362	0.40875	22.453				0.44042	6.1027	0.44042	13.6099
	0.40903	6.2338	0.40903	22.4744				0.44069	6.1008	0.44069	13.6449
	0.40931	6.2314	0.40931	22.4956				0.44097	6.0989	0.44097	13.6798
	0.40958	6.2289	0.40958	22.5165				0.44125	6.097	0.44125	13.7146
	0.40986	6.2265	0.40986	22.5373				0.44153	6.0952	0.44153	13.7494
	0.41014	6.2241	0.41014	22.5578				0.44181	6.0933	0.44181	13.7842
	0.41042	6.2217	0.41042	22.578				0.44208	6.0914	0.44208	13.8189
	0.41069	6.2193	0.41069	22.5981				0.44236	6.0896	0.44236	13.8535
	0.41097	6.2169	0.41097	22.6179				0.44264	6.0877	0.44264	13.8881
	0.41125	6.2145	0.41125	22.6374				0.44292	6.0859	0.44292	13.9226
	0.41153	6.2121	0.41153	22.6568				0.44319	6.084	0.44319	13.9571
	0.41181	6.2098	0.41181	22.6759				0.44347	6.0822	0.44347	13.9915
	0.41208	6.2074	0.41208	22.6948				0.44375	6.0803	0.44375	14.0259
	0.41236	6.205	0.41236	22.7135				0.44403	6.0785	0.44403	14.0601
	0.41264	6.2026	0.41264	22.732				0.44431	6.0766	0.44431	14.0944
	0.41292	6.2003	0.41292	22.7502				0.44458	6.0748	0.44458	14.1286
	0.41319	6.1979	0.41319	22.7681				0.44486	6.073	0.44486	14.1627
	0.41347	6.1956	0.41347	22.7859				0.44514	6.0711	0.44514	14.1967
	0.41375	6.1932	0.41375	22.8035				0.44542	6.0693	0.44542	14.2307
	0.41403	6.1909	0.41403	22.8208				0.44569	6.0675	0.44569	14.2646
	0.41431	6.1886	0.41431	22.8378				0.44597	6.0657	0.44597	14.2985
	0.41458	6.1862	0.41458	22.8547				0.44625	6.0639	0.44625	14.3323
	0.41486	6.1839	0.41486	22.8713				0.44653	6.0621	0.44653	14.366
	0.41514	6.1816	0.41514	22.8877				0.44681	6.0603	0.44681	14.3997
	0.41542	6.1793	0.41542	22.9039				0.44708	6.0585	0.44708	14.4333
	0.41569	6.177	0.41569	22.9198				0.44736	6.0567	0.44736	14.4669
	0.41597	6.1747	0.41597	22.9355				0.44764	6.0549	0.44764	14.5003
	0.41625	6.1724	0.41625	22.951				0.44792	6.0531	0.44792	14.5337
	0.41653	6.1701	0.41653	22.9662				0.44819	6.0513	0.44819	14.5671
	0.41681	6.1678	0.41681	22.9813				0.44847	6.0495	0.44847	14.6003
	0.41708	6.1656	0.41708	22.9961				0.44875	6.0477	0.44875	14.6335
	0.41736	6.1633	0.41736	23.0107				0.44903	6.046	0.44903	14.6667
	0.41764	6.161	0.41764	23.0251				0.44931	6.0442	0.44931	14.6997
	0.41792	6.1587	0.41792	23.0392				0.44958	6.0424	0.44958	14.7327
	0.41819	6.1565	0.41819	23.0532				0.44986	6.0407	0.44986	14.7657
	0.41847	6.1542	0.41847	23.0669				0.45014	6.0389	0.45014	14.7985
	0.41875	6.152	0.41875	23.0803				0.45042	6.0371	0.45042	14.8313
	0.41903	6.1497	0.41903	23.0936				0.45069	6.0354	0.45069	14.864
	0.41931	6.1475	0.41931	23.1066				0.45097	6.0336	0.45097	14.8966
	0.41958	6.1453	0.41958	23.1194				0.45125	6.0319	0.45125	14.9291
	0.41986	6.1431	0.41986	23.132				0.45153	6.0302	0.45153	14.9616
	0.42014	6.1408	0.42014	23.1443				0.45181	6.0284	0.45181	14.994
	0.42042	6.1386	0.42042	23.1564				0.45208	6.0267	0.45208	15.0264
	0.42069	6.1364	0.42069	23.1683				0.45236	6.0249	0.45236	15.0586
	0.42097	6.1342	0.42097	23.18				0.45264	6.0232	0.45264	15.0908
	0.42125	6.132	0.42125	23.1915				0.45292	6.0215	0.45292	15.1229
	0.42153	6.1298	0.42153	23.2027				0.45319	6.0198	0.45319	15.1549
	0.42181	6.1276	0.42181	23.2137				0.45347	6.018	0.45347	15.1868
	0.42208	6.1254	0.42208	23.2245				0.45375	6.0163	0.45375	15.2187
	0.42236	6.1232	0.42236	23.2351				0.45403	6.0146	0.45403	15.2504
	0.42264	6.1211	0.42264	23.2455				0.45431	6.0129	0.45431	15.2821
	0.42292	6.1189	0.42292	23.2556				0.45458	6.0112	0.45458	15.3137
	0.42319	6.1167	0.42319	23.2656				0.45486	6.0095	0.45486	15.3452
	0.42347	6.1145	0.42347	23.2753				0.45514	6.0078	0.45514	15.3767
	0.42375	6.1124	0.42375	23.2848				0.45542	6.0061	0.45542	15.408
	0.42403	6.1102	0.42403	23.2941				0.45569	6.0044	0.45569	15.4393
	0.42431	6.1081	0.42431	23.3031				0.45597	6.0027	0.45597	15.4704
	0.42458	6.1059	0.42458	23.312				0.45625	6.001	0.45625	15.5015
	0.42486	6.1038	0.42486	23.3206				0.45653	5.9994	0.45653	15.5325
	0.42514	6.1017	0.42514	23.329				0.45681	5.9977	0.45681	15.5634
	0.42542	6.0996	0.42542	23.3372				0.45708	5.996	0.45708	15.5943
	0.42569	6.0974	0.42569	23.3452				0.45736	5.9943	0.45736	15.625
	0.42597	6.0953	0.42597	23.3529				0.45764	5.9927	0.45764	15.6556
	0.42625	6.0932	0.42625	23.3605				0.45792	5.991	0.45792	15.6862
	0.42653	6.0911	0.42653	23.3678				0.45819	5.9893	0.45819	15.7167
	0.42681	6.089	0.42681	23.3749				0.45847	5.9877	0.45847	15.747
	0.42708	6.0869	0.42708	23.3819				0.45875	5.986	0.45875	15.7773
	0.42736	6.0848	0.42736	23.3885				0.45903	5.9844	0.45903	15.8075
	0.42764	6.0827	0.42764	23.395				0.45931	5.9827	0.45931	15.8376
	0.42792	6.0806	0.42792	23.4013				0.45958	5.9811	0.45958	15.8676
	0.42819	6.0785	0.42819	23.4074				0.45986	5.9794	0.45986	15.8975
	0.42847	6.0765	0.42847	23.4132				0.46014	5.9778	0.46014	15.9273
	0.42875	6.0744	0.42875	23.4189				0.46042	5.9761	0.46042	15.957
	0.42903	6.0723	0.42903	23.4243				0.46069	5.9745	0.46069	15.9866
	0.42931	6.0703	0.42931	23.4295				0.46097	5.9729	0.46097	16.0162
	0.42958	6.0682	0.42958	23.4346				0.46125	5.9713	0.46125	16.0456
	0.42986	6.0662	0.42986	23.4394				0.46153	5.9696	0.46153	16.0749
	0.43014	6.0641	0.43014	23.444				0.46181	5.968	0.46181	16.1041
	0.43042	6.0621	0.43042	23.4484				0.46208	5.9664	0.46208	16.1333
	0.43069	6.06	0.43069	23.4526				0.46236	5.9648	0.46236	16.1623
	0.43097	6.058	0.43097	23.4566				0.46264	5.9632	0.46264	16.1912
	0.43125	6.056	0.43125	23.4604				0.46292	5.9616	0.46292	16.22
	0.43153	6.0539	0.43153	23.4639				0.46319	5.9599	0.46319	16.2488
	0.43181	6.0519	0.43181	23.4673				0.46347	5.9583	0.46347	16.2774
	0.43208	6.0499	0.43208	23.4705				0.46375	5.9567	0.46375	16.3059
	0.43236	6.0479	0.43236	23.4735				0.46403	5.9551	0.46403	16.3344
	0.43264	6.0459	0.43264	23.4762				0.46431	5.9536	0.46431	16.3627
	0.43292	6.0439	0.43292	23.4788				0.46458	5.952	0.46458	16.3909
	0.43319	6.0419	0.43319	23.4812				0.46486	5.9504	0.46486	16.419
	0.43347	6.0399	0.43347	23.4833				0.46514	5.9488	0.46514	16.447
	0.43375	6.0379	0.43375	23.4853				0.46542	5.9472	0.46542	16.4749
	0.43403	6.0359	0.43403	23.4871				0.46569	5.9456	0.46569	16.5027
	0.43431	6.034	0.43431	23.4886				0.46597	5.9441	0.46597	16.5304
	0.43458	6.032	0.43458	23.49				0.46625	5.9425	0.46625	16.558
	0.43486	6.03	0.43486	23.4912				0.46653	5.9409	0.46653	16.5855
	0.43514	6.028	0.43514	23.4922				0.46681	5.9394	0.46681	16.6129
	0.43542	6.0261	0.43542	23.493				0.46708	5.9378	0.46708	16.6402
	0.43569	6.0241	0.43569	23.4936				0.46736	5.9362	0.46736	16.6673
	0.43597	6.0222	0.43597	23.494				0.46764	5.9347	0.46764	16.6944
	0.43625	6.0202	0.43625	23.4942				0.46792	5.9331	0.46792	16.7213
	0.43653	6.0183	0.43653	23.4942				0.46819	5.9316	0.46819	16.7482
	0.43681	6.0163	0.43681	23.494				0.46847	5.93	0.46847	16.7749
	0.43708	6.0144	0.43708	23.4936				0.46875	5.9285	0.46875	16.8015
	0.43736	6.0125	0.43736	23.4931				0.46903	5.9269	0.46903	16.828
	0.43764	6.0105	0.43764	23.4923				0.46931	5.9254	0.46931	16.8544
	0.43792	6.0086	0.43792	23.4914				0.46958	5.9239	0.46958	16.8807
	0.43819	6.0067	0.43819	23.4902				0.46986	5.9223	0.46986	16.9069
	0.43847	6.0048	0.43847	23.4889				0.47014	5.9208	0.47014	16.933
	0.43875	6.0029	0.43875	23.4874				0.47042	5.9193	0.47042	16.9589
	0.43903	6.001	0.43903	23.4857				0.47069	5.9178	0.47069	16.9848
	0.43931	5.9991	0.43931	23.4838				0.47097	5.9162	0.47097	17.0105
	0.43958	5.9972	0.43958	23.4818				0.47125	5.9147	0.47125	17.0361
	0.43986	5.9953	0.43986	23.4795				0.47153	5.9132	0.47153	17.0616
	0.44014	5.9934	0.44014	23.4771				0.47181	5.9117	0.47181	17.087
	0.44042	5.9915	0.44042	23.4744				0.47208	5.9102	0.47208	17.1123
	0.44069	5.9896	0.44069	23.4716				0.47236	5.9087	0.47236	17.1375
	0.44097	5.9878	0.44097	23.4687				0.47264	5.9072	0.47264	17.1625
	0.44125	5.9859	0.44125	23.4655				0.47292	5.9057	0.47292	17.1875
	0.44153	5.984	0.44153	23.4621				0.47319	5.9042	0.47319	17.2123
	0.44181	5.9822	0.44181	23.4586				0.47347	5.9027	0.47347	17.237
	0.44208	5.9803	0.44208	23.4549				0.47375	5.9012	0.47375	17.2616
	0.44236	5.9785	0.44236	23.451				0.47403	5.8997	0.47403	17.286
	0.44264	5.9766	0.44264	23.447				0.47431	5.8982	0.47431	17.3104
	0.44292	5.9748	0.44292	23.4427				0.47458	5.8968	0.47458	17.3346
	0.44319	5.9729	0.44319	23.4383				0.47486	5.8953	0.47486	17.3587
	0.44347	5.9711	0.44347	23.4337				0.47514	5.8938	0.47514	17.3827
	0.44375	5.9693	0.44375	23.429				0.47542	5.8923	0.47542	17.4066
	0.44403	5.9674	0.44403	23.424				0.47569	5.8909	0.47569	17.4304
	0.44431	5.9656	0.44431	23.4189				0.47597	5.8894	0.47597	17.454
	0.44458	5.9638	0.44458	23.4136				0.47625	5.8879	0.47625	17.4775
	0.44486	5.962	0.44486	23.4082				0.47653	5.8864	0.47653	17.5009
	0.44514	5.9602	0.44514	23.4026				0.47681	5.885	0.47681	17.5242
	0.44542	5.9583	0.44542	23.3968				0.47708	5.8835	0.47708	17.5474
	0.44569	5.9565	0.44569	23.3908				0.47736	5.8821	0.47736	17.5704
	0.44597	5.9547	0.44597	23.3847				0.47764	5.8806	0.47764	17.5933
	0.44625	5.9529	0.44625	23.3784				0.47792	5.8792	0.47792	17.6161
	0.44653	5.9512	0.44653	23.3719				0.47819	5.8777	0.47819	17.6388
	0.44681	5.9494	0.44681	23.3653				0.47847	5.8763	0.47847	17.6614
	0.44708	5.9476	0.44708	23.3585				0.47875	5.8748	0.47875	17.6838
	0.44736	5.9458	0.44736	23.3516				0.47903	5.8734	0.47903	17.7061
	0.44764	5.944	0.44764	23.3444				0.47931	5.872	0.47931	17.7283
	0.44792	5.9423	0.44792	23.3372				0.47958	5.8706	0.47958	17.7504
	0.44819	5.9405	0.44819	23.3297				0.47986	5.8691	0.47986	17.7723
	0.44847	5.9387	0.44847	23.3221				0.48014	5.8677	0.48014	17.7941
	0.44875	5.937	0.44875	23.3144				0.48042	5.8663	0.48042	17.8158
	0.44903	5.9352	0.44903	23.3064				0.48069	5.8649	0.48069	17.8374
	0.44931	5.9335	0.44931	23.2984				0.48097	5.8634	0.48097	17.8589
	0.44958	5.9317	0.44958	23.2901				0.48125	5.862	0.48125	17.8802
	0.44986	5.93	0.44986	23.2817				0.48153	5.8606	0.48153	17.9014
	0.45014	5.9282	0.45014	23.2732				0.48181	5.8592	0.48181	17.9224
	0.45042	5.9265	0.45042	23.2644				0.48208	5.8578	0.48208	17.9434
	0.45069	5.9248	0.45069	23.2556				0.48236	5.8564	0.48236	17.9642
	0.45097	5.923	0.45097	23.2466				0.48264	5.855	0.48264	17.9849
	0.45125	5.9213	0.45125	23.2374				0.48292	5.8536	0.48292	18.0055
	0.45153	5.9196	0.45153	23.2281				0.48319	5.8522	0.48319	18.0259
	0.45181	5.9179	0.45181	23.2186				0.48347	5.8508	0.48347	18.0462
	0.45208	5.9161	0.45208	23.209				0.48375	5.8494	0.48375	18.0664
	0.45236	5.9144	0.45236	23.1992				0.48403	5.848	0.48403	18.0865
	0.45264	5.9127	0.45264	23.1893				0.48431	5.8466	0.48431	18.1064
	0.45292	5.911	0.45292	23.1792				0.48458	5.8453	0.48458	18.1263
	0.45319	5.9093	0.45319	23.169				0.48486	5.8439	0.48486	18.1459
	0.45347	5.9076	0.45347	23.1586				0.48514	5.8425	0.48514	18.1655
	0.45375	5.906	0.45375	23.1481				0.48542	5.8411	0.48542	18.1849
	0.45403	5.9043	0.45403	23.1374				0.48569	5.8398	0.48569	18.2042
	0.45431	5.9026	0.45431	23.1266				0.48597	5.8384	0.48597	18.2234
	0.45458	5.9009	0.45458	23.1157				0.48625	5.837	0.48625	18.2424
	0.45486	5.8992	0.45486	23.1046				0.48653	5.8357	0.48653	18.2613
	0.45514	5.8976	0.45514	23.0934				0.48681	5.8343	0.48681	18.2801
	0.45542	5.8959	0.45542	23.082				0.48708	5.8329	0.48708	18.2988
	0.45569	5.8942	0.45569	23.0705				0.48736	5.8316	0.48736	18.3173
	0.45597	5.8926	0.45597	23.0588				0.48764	5.8302	0.48764	18.3357
	0.45625	5.8909	0.45625	23.047				0.48792	5.8289	0.48792	18.354
	0.45653	5.8893	0.45653	23.0351				0.48819	5.8275	0.48819	18.3721
	0.45681	5.8876	0.45681	23.0231				0.48847	5.8262	0.48847	18.3901
	0.45708	5.886	0.45708	23.0109				0.48875	5.8248	0.48875	18.408
	0.45736	5.8843	0.45736	22.9985				0.48903	5.8235	0.48903	18.4258
	0.45764	5.8827	0.45764	22.9861				0.48931	5.8222	0.48931	18.4434
	0.45792	5.8811	0.45792	22.9735				0.48958	5.8208	0.48958	18.4609
	0.45819	5.8794	0.45819	22.9607				0.48986	5.8195	0.48986	18.4783
	0.45847	5.8778	0.45847	22.9478				0.49014	5.8182	0.49014	18.4955
	0.45875	5.8762	0.45875	22.9348				0.49042	5.8168	0.49042	18.5126
	0.45903	5.8746	0.45903	22.9217				0.49069	5.8155	0.49069	18.5296
	0.45931	5.8729	0.45931	22.9085				0.49097	5.8142	0.49097	18.5464
	0.45958	5.8713	0.45958	22.8951				0.49125	5.8129	0.49125	18.5631
	0.45986	5.8697	0.45986	22.8816				0.49153	5.8116	0.49153	18.5797
	0.46014	5.8681	0.46014	22.8679				0.49181	5.8102	0.49181	18.5961
	0.46042	5.8665	0.46042	22.8542				0.49208	5.8089	0.49208	18.6125
	0.46069	5.8649	0.46069	22.8403				0.49236	5.8076	0.49236	18.6287
	0.46097	5.8633	0.46097	22.8263				0.49264	5.8063	0.49264	18.6447
	0.46125	5.8617	0.46125	22.8121				0.49292	5.805	0.49292	18.6607
	0.46153	5.8601	0.46153	22.7979				0.49319	5.8037	0.49319	18.6765
	0.46181	5.8586	0.46181	22.7835				0.49347	5.8024	0.49347	18.6921
	0.46208	5.857	0.46208	22.769				0.49375	5.8011	0.49375	18.7077
	0.46236	5.8554	0.46236	22.7544				0.49403	5.7998	0.49403	18.7231
	0.46264	5.8538	0.46264	22.7396				0.49431	5.7985	0.49431	18.7384
	0.46292	5.8523	0.46292	22.7248				0.49458	5.7972	0.49458	18.7535
	0.46319	5.8507	0.46319	22.7098				0.49486	5.7959	0.49486	18.7685
	0.46347	5.8491	0.46347	22.6947				0.49514	5.7946	0.49514	18.7834
	0.46375	5.8476	0.46375	22.6795				0.49542	5.7934	0.49542	18.7981
	0.46403	5.846	0.46403	22.6642				0.49569	5.7921	0.49569	18.8127
	0.46431	5.8445	0.46431	22.6487				0.49597	5.7908	0.49597	18.8272
	0.46458	5.8429	0.46458	22.6332				0.49625	5.7895	0.49625	18.8416
	0.46486	5.8414	0.46486	22.6175				0.49653	5.7883	0.49653	18.8558
	0.46514	5.8398	0.46514	22.6018				0.49681	5.787	0.49681	18.8699
	0.46542	5.8383	0.46542	22.5859				0.49708	5.7857	0.49708	18.8838
	0.46569	5.8367	0.46569	22.5699				0.49736	5.7845	0.49736	18.8976
	0.46597	5.8352	0.46597	22.5538				0.49764	5.7832	0.49764	18.9113
	0.46625	5.8337	0.46625	22.5376				0.49792	5.7819	0.49792	18.9249
	0.46653	5.8322	0.46653	22.5213				0.49819	5.7807	0.49819	18.9383
	0.46681	5.8306	0.46681	22.5048				0.49847	5.7794	0.49847	18.9516
	0.46708	5.8291	0.46708	22.4883				0.49875	5.7782	0.49875	18.9648
	0.46736	5.8276	0.46736	22.4717				0.49903	5.7769	0.49903	18.9778
	0.46764	5.8261	0.46764	22.4549				0.49931	5.7757	0.49931	18.9907
	0.46792	5.8246	0.46792	22.4381				0.49958	5.7744	0.49958	19.0035
	0.46819	5.8231	0.46819	22.4211				0.49986	5.7732	0.49986	19.0162
	0.46847	5.8216	0.46847	22.4041				0.50014	5.7719	0.50014	19.0287
	0.46875	5.8201	0.46875	22.3869				0.50042	5.7707	0.50042	19.0411
	0.46903	5.8186	0.46903	22.3697				0.50069	5.7695	0.50069	19.0533
	0.46931	5.8171	0.46931	22.3523				0.50097	5.7682	0.50097	19.0654
	0.46958	5.8156	0.46958	22.3349				0.50125	5.767	0.50125	19.0774
	0.46986	5.8141	0.46986	22.3173				0.50153	5.7658	0.50153	19.0893
	0.47014	5.8126	0.47014	22.2997				0.50181	5.7645	0.50181	19.101
	0.47042	5.8112	0.47042	22.2819				0.50208	5.7633	0.50208	19.1126
	0.47069	5.8097	0.47069	22.2641				0.50236	5.7621	0.50236	19.1241
	0.47097	5.8082	0.47097	22.2462				0.50264	5.7609	0.50264	19.1354
	0.47125	5.8067	0.47125	22.2281				0.50292	5.7597	0.50292	19.1466
	0.47153	5.8053	0.47153	22.21				0.50319	5.7584	0.50319	19.1577
	0.47181	5.8038	0.47181	22.1918				0.50347	5.7572	0.50347	19.1687
	0.47208	5.8024	0.47208	22.1734				0.50375	5.756	0.50375	19.1795
	0.47236	5.8009	0.47236	22.155				0.50403	5.7548	0.50403	19.1902
	0.47264	5.7994	0.47264	22.1365				0.50431	5.7536	0.50431	19.2007
	0.47292	5.798	0.47292	22.118				0.50458	5.7524	0.50458	19.2111
	0.47319	5.7965	0.47319	22.0993				0.50486	5.7512	0.50486	19.2214
	0.47347	5.7951	0.47347	22.0805				0.50514	5.75	0.50514	19.2316
	0.47375	5.7937	0.47375	22.0617				0.50542	5.7488	0.50542	19.2416
	0.47403	5.7922	0.47403	22.0427				0.50569	5.7476	0.50569	19.2515
	0.47431	5.7908	0.47431	22.0237				0.50597	5.7464	0.50597	19.2613
	0.47458	5.7893	0.47458	22.0046				0.50625	5.7452	0.50625	19.2709
	0.47486	5.7879	0.47486	21.9854				0.50653	5.744	0.50653	19.2804
	0.47514	5.7865	0.47514	21.9662				0.50681	5.7429	0.50681	19.2898
	0.47542	5.7851	0.47542	21.9468				0.50708	5.7417	0.50708	19.2991
	0.47569	5.7837	0.47569	21.9274				0.50736	5.7405	0.50736	19.3082
	0.47597	5.7822	0.47597	21.9079				0.50764	5.7393	0.50764	19.3172
	0.47625	5.7808	0.47625	21.8883				0.50792	5.7381	0.50792	19.326
	0.47653	5.7794	0.47653	21.8686				0.50819	5.737	0.50819	19.3348
	0.47681	5.778	0.47681	21.8488				0.50847	5.7358	0.50847	19.3434
	0.47708	5.7766	0.47708	21.829				0.50875	5.7346	0.50875	19.3519
	0.47736	5.7752	0.47736	21.8091				0.50903	5.7334	0.50903	19.3602
	0.47764	5.7738	0.47764	21.7891				0.50931	5.7323	0.50931	19.3685
	0.47792	5.7724	0.47792	21.7691				0.50958	5.7311	0.50958	19.3765
	0.47819	5.771	0.47819	21.749				0.50986	5.73	0.50986	19.3845
	0.47847	5.7696	0.47847	21.7287				0.51014	5.7288	0.51014	19.3923
	0.47875	5.7682	0.47875	21.7085				0.51042	5.7276	0.51042	19.4001
	0.47903	5.7669	0.47903	21.6881				0.51069	5.7265	0.51069	19.4076
	0.47931	5.7655	0.47931	21.6677				0.51097	5.7253	0.51097	19.4151
	0.47958	5.7641	0.47958	21.6472				0.51125	5.7242	0.51125	19.4224
	0.47986	5.7628	0.47986	21.6266				0.51153	5.723	0.51153	19.4296
	0.48014	5.7614	0.48014	21.606				0.51181	5.7219	0.51181	19.4367
	0.48042	5.76	0.48042	21.5853				0.51208	5.7207	0.51208	19.4437
	0.48069	5.7586	0.48069	21.5645				0.51236	5.7196	0.51236	19.4505
	0.48097	5.7573	0.48097	21.5436				0.51264	5.7185	0.51264	19.4572
	0.48125	5.7559	0.48125	21.5227				0.51292	5.7173	0.51292	19.4638
	0.48153	5.7546	0.48153	21.5018				0.51319	5.7162	0.51319	19.4702
	0.48181	5.7532	0.48181	21.4807				0.51347	5.7151	0.51347	19.4765
	0.48208	5.7519	0.48208	21.4596				0.51375	5.7139	0.51375	19.4827
	0.48236	5.7505	0.48236	21.4384				0.51403	5.7128	0.51403	19.4888
	0.48264	5.7492	0.48264	21.4172				0.51431	5.7117	0.51431	19.4947
	0.48292	5.7478	0.48292	21.3959				0.51458	5.7105	0.51458	19.5006
	0.48319	5.7465	0.48319	21.3745				0.51486	5.7094	0.51486	19.5062
	0.48347	5.7452	0.48347	21.3531				0.51514	5.7083	0.51514	19.5118
	0.48375	5.7438	0.48375	21.3316				0.51542	5.7072	0.51542	19.5173
	0.48403	5.7425	0.48403	21.3101				0.51569	5.7061	0.51569	19.5226
	0.48431	5.7412	0.48431	21.2885				0.51597	5.7049	0.51597	19.5278
	0.48458	5.7398	0.48458	21.2668				0.51625	5.7038	0.51625	19.5329
	0.48486	5.7385	0.48486	21.2451				0.51653	5.7027	0.51653	19.5378
	0.48514	5.7372	0.48514	21.2234				0.51681	5.7016	0.51681	19.5427
	0.48542	5.7359	0.48542	21.2015				0.51708	5.7005	0.51708	19.5474
	0.48569	5.7346	0.48569	21.1796				0.51736	5.6994	0.51736	19.552
	0.48597	5.7333	0.48597	21.1577				0.51764	5.6983	0.51764	19.5564
	0.48625	5.732	0.48625	21.1357				0.51792	5.6972	0.51792	19.5608
	0.48653	5.7307	0.48653	21.1137				0.51819	5.6961	0.51819	19.565
	0.48681	5.7294	0.48681	21.0916				0.51847	5.695	0.51847	19.5691
	0.48708	5.7281	0.48708	21.0694				0.51875	5.6939	0.51875	19.5731
	0.48736	5.7268	0.48736	21.0472				0.51903	5.6928	0.51903	19.5769
	0.48764	5.7255	0.48764	21.0249				0.51931	5.6917	0.51931	19.5807
	0.48792	5.7242	0.48792	21.0026				0.51958	5.6906	0.51958	19.5843
	0.48819	5.7229	0.48819	20.9803				0.51986	5.6896	0.51986	19.5878
	0.48847	5.7216	0.48847	20.9579				0.52014	5.6885	0.52014	19.5911
	0.48875	5.7204	0.48875	20.9354				0.52042	5.6874	0.52042	19.5944
	0.48903	5.7191	0.48903	20.9129				0.52069	5.6863	0.52069	19.5975
	0.48931	5.7178	0.48931	20.8904				0.52097	5.6852	0.52097	19.6005
	0.48958	5.7165	0.48958	20.8678				0.52125	5.6842	0.52125	19.6035
	0.48986	5.7153	0.48986	20.8451				0.52153	5.6831	0.52153	19.6062
	0.49014	5.714	0.49014	20.8225				0.52181	5.682	0.52181	19.6089
	0.49042	5.7127	0.49042	20.7997				0.52208	5.681	0.52208	19.6114
	0.49069	5.7115	0.49069	20.7769				0.52236	5.6799	0.52236	19.6139
	0.49097	5.7102	0.49097	20.7541				0.52264	5.6788	0.52264	19.6162
	0.49125	5.709	0.49125	20.7313				0.52292	5.6778	0.52292	19.6184
	0.49153	5.7077	0.49153	20.7083				0.52319	5.6767	0.52319	19.6205
	0.49181	5.7065	0.49181	20.6854				0.52347	5.6756	0.52347	19.6224
	0.49208	5.7052	0.49208	20.6624				0.52375	5.6746	0.52375	19.6243
	0.49236	5.704	0.49236	20.6394				0.52403	5.6735	0.52403	19.626
	0.49264	5.7027	0.49264	20.6163				0.52431	5.6725	0.52431	19.6276
	0.49292	5.7015	0.49292	20.5932				0.52458	5.6714	0.52458	19.6291
	0.49319	5.7003	0.49319	20.57				0.52486	5.6704	0.52486	19.6305
	0.49347	5.699	0.49347	20.5468				0.52514	5.6693	0.52514	19.6318
	0.49375	5.6978	0.49375	20.5236				0.52542	5.6683	0.52542	19.6329
	0.49403	5.6966	0.49403	20.5004				0.52569	5.6672	0.52569	19.634
	0.49431	5.6953	0.49431	20.4771				0.52597	5.6662	0.52597	19.6349
	0.49458	5.6941	0.49458	20.4538				0.52625	5.6652	0.52625	19.6357
	0.49486	5.6929	0.49486	20.4304				0.52653	5.6641	0.52653	19.6364
	0.49514	5.6917	0.49514	20.407				0.52681	5.6631	0.52681	19.637
	0.49542	5.6905	0.49542	20.3835				0.52708	5.6621	0.52708	19.6375
	0.49569	5.6892	0.49569	20.3601				0.52736	5.661	0.52736	19.6379
	0.49597	5.688	0.49597	20.3366				0.52764	5.66	0.52764	19.6381
	0.49625	5.6868	0.49625	20.313				0.52792	5.659	0.52792	19.6383
	0.49653	5.6856	0.49653	20.2895				0.52819	5.6579	0.52819	19.6383
	0.49681	5.6844	0.49681	20.2659				0.52847	5.6569	0.52847	19.6382
	0.49708	5.6832	0.49708	20.2422				0.52875	5.6559	0.52875	19.638
	0.49736	5.682	0.49736	20.2186				0.52903	5.6549	0.52903	19.6377
	0.49764	5.6808	0.49764	20.1949				0.52931	5.6539	0.52931	19.6373
	0.49792	5.6796	0.49792	20.1712				0.52958	5.6528	0.52958	19.6368
	0.49819	5.6785	0.49819	20.1475				0.52986	5.6518	0.52986	19.6362
	0.49847	5.6773	0.49847	20.1237				0.53014	5.6508	0.53014	19.6354
	0.49875	5.6761	0.49875	20.0999				0.53042	5.6498	0.53042	19.6346
	0.49903	5.6749	0.49903	20.0761				0.53069	5.6488	0.53069	19.6336
	0.49931	5.6737	0.49931	20.0522				0.53097	5.6478	0.53097	19.6326
	0.49958	5.6725	0.49958	20.0283				0.53125	5.6468	0.53125	19.6314
	0.49986	5.6714	0.49986	20.0044				0.53153	5.6458	0.53153	19.6301
	0.50014	5.6702	0.50014	19.9805				0.53181	5.6448	0.53181	19.6287
	0.50042	5.669	0.50042	19.9566				0.53208	5.6438	0.53208	19.6273
	0.50069	5.6679	0.50069	19.9326				0.53236	5.6428	0.53236	19.6257
	0.50097	5.6667	0.50097	19.9087				0.53264	5.6418	0.53264	19.624
	0.50125	5.6655	0.50125	19.8846				0.53292	5.6408	0.53292	19.6222
	0.50153	5.6644	0.50153	19.8606				0.53319	5.6398	0.53319	19.6203
	0.50181	5.6632	0.50181	19.8366				0.53347	5.6388	0.53347	19.6182
	0.50208	5.6621	0.50208	19.8125				0.53375	5.6378	0.53375	19.6161
	0.50236	5.6609	0.50236	19.7884				0.53403	5.6368	0.53403	19.6139
	0.50264	5.6598	0.50264	19.7643				0.53431	5.6358	0.53431	19.6116
	0.50292	5.6586	0.50292	19.7401				0.53458	5.6349	0.53458	19.6092
	0.50319	5.6575	0.50319	19.716				0.53486	5.6339	0.53486	19.6066
	0.50347	5.6563	0.50347	19.6918				0.53514	5.6329	0.53514	19.604
	0.50375	5.6552	0.50375	19.6676				0.53542	5.6319	0.53542	19.6012
	0.50403	5.654	0.50403	19.6434				0.53569	5.6309	0.53569	19.5984
	0.50431	5.6529	0.50431	19.6191				0.53597	5.63	0.53597	19.5955
	0.50458	5.6518	0.50458	19.5949				0.53625	5.629	0.53625	19.5924
	0.50486	5.6506	0.50486	19.5706				0.53653	5.628	0.53653	19.5893
	0.50514	5.6495	0.50514	19.5463				0.53681	5.6271	0.53681	19.5861
	0.50542	5.6484	0.50542	19.522				0.53708	5.6261	0.53708	19.5827
	0.50569	5.6473	0.50569	19.4977				0.53736	5.6251	0.53736	19.5793
	0.50597	5.6462	0.50597	19.4734				0.53764	5.6242	0.53764	19.5758
	0.50625	5.645	0.50625	19.4491				0.53792	5.6232	0.53792	19.5721
	0.50653	5.6439	0.50653	19.4247				0.53819	5.6222	0.53819	19.5684
	0.50681	5.6428	0.50681	19.4004				0.53847	5.6213	0.53847	19.5646
	0.50708	5.6417	0.50708	19.376				0.53875	5.6203	0.53875	19.5606
	0.50736	5.6406	0.50736	19.3516				0.53903	5.6194	0.53903	19.5566
	0.50764	5.6395	0.50764	19.3272				0.53931	5.6184	0.53931	19.5525
	0.50792	5.6384	0.50792	19.3028				0.53958	5.6175	0.53958	19.5483
	0.50819	5.6373	0.50819	19.2784				0.53986	5.6165	0.53986	19.544
	0.50847	5.6362	0.50847	19.2539				0.54014	5.6156	0.54014	19.5395
	0.50875	5.6351	0.50875	19.2295				0.54042	5.6146	0.54042	19.535
	0.50903	5.634	0.50903	19.205				0.54069	5.6137	0.54069	19.5304
	0.50931	5.6329	0.50931	19.1806				0.54097	5.6127	0.54097	19.5257
	0.50958	5.6318	0.50958	19.1561				0.54125	5.6118	0.54125	19.5209
	0.50986	5.6307	0.50986	19.1316				0.54153	5.6109	0.54153	19.5161
	0.51014	5.6296	0.51014	19.1072				0.54181	5.6099	0.54181	19.5111
	0.51042	5.6285	0.51042	19.0827				0.54208	5.609	0.54208	19.506
	0.51069	5.6275	0.51069	19.0582				0.54236	5.6081	0.54236	19.5008
	0.51097	5.6264	0.51097	19.0337				0.54264	5.6071	0.54264	19.4956
	0.51125	5.6253	0.51125	19.0092				0.54292	5.6062	0.54292	19.4902
	0.51153	5.6242	0.51153	18.9847				0.54319	5.6053	0.54319	19.4848
	0.51181	5.6232	0.51181	18.9602				0.54347	5.6043	0.54347	19.4793
	0.51208	5.6221	0.51208	18.9356				0.54375	5.6034	0.54375	19.4737
	0.51236	5.621	0.51236	18.9111				0.54403	5.6025	0.54403	19.4679
	0.51264	5.62	0.51264	18.8866				0.54431	5.6016	0.54431	19.4622
	0.51292	5.6189	0.51292	18.862				0.54458	5.6006	0.54458	19.4563
	0.51319	5.6178	0.51319	18.8375				0.54486	5.5997	0.54486	19.4503
	0.51347	5.6168	0.51347	18.813				0.54514	5.5988	0.54514	19.4442
	0.51375	5.6157	0.51375	18.7884				0.54542	5.5979	0.54542	19.4381
	0.51403	5.6147	0.51403	18.7639				0.54569	5.597	0.54569	19.4319
	0.51431	5.6136	0.51431	18.7394				0.54597	5.5961	0.54597	19.4255
	0.51458	5.6126	0.51458	18.7148				0.54625	5.5952	0.54625	19.4191
	0.51486	5.6115	0.51486	18.6903				0.54653	5.5943	0.54653	19.4126
	0.51514	5.6105	0.51514	18.6657				0.54681	5.5933	0.54681	19.406
	0.51542	5.6094	0.51542	18.6412				0.54708	5.5924	0.54708	19.3994
	0.51569	5.6084	0.51569	18.6167				0.54736	5.5915	0.54736	19.3926
	0.51597	5.6074	0.51597	18.5921				0.54764	5.5906	0.54764	19.3858
	0.51625	5.6063	0.51625	18.5676				0.54792	5.5897	0.54792	19.3789
	0.51653	5.6053	0.51653	18.5431				0.54819	5.5888	0.54819	19.3719
	0.51681	5.6043	0.51681	18.5185				0.54847	5.588	0.54847	19.3648
	0.51708	5.6032	0.51708	18.494				0.54875	5.5871	0.54875	19.3576
	0.51736	5.6022	0.51736	18.4695				0.54903	5.5862	0.54903	19.3503
	0.51764	5.6012	0.51764	18.4449				0.54931	5.5853	0.54931	19.343
	0.51792	5.6002	0.51792	18.4204				0.54958	5.5844	0.54958	19.3356
	0.51819	5.5991	0.51819	18.3959				0.54986	5.5835	0.54986	19.3281
	0.51847	5.5981	0.51847	18.3713				0.55014	5.5826	0.55014	19.3205
	0.51875	5.5971	0.51875	18.3468				0.55042	5.5817	0.55042	19.3128
	0.51903	5.5961	0.51903	18.3223				0.55069	5.5808	0.55069	19.3051
	0.51931	5.5951	0.51931	18.2978				0.55097	5.58	0.55097	19.2972
	0.51958	5.5941	0.51958	18.2733				0.55125	5.5791	0.55125	19.2893
	0.51986	5.5931	0.51986	18.2489				0.55153	5.5782	0.55153	19.2813
	0.52014	5.5921	0.52014	18.2244				0.55181	5.5773	0.55181	19.2733
	0.52042	5.591	0.52042	18.1999				0.55208	5.5764	0.55208	19.2652
	0.52069	5.59	0.52069	18.1754				0.55236	5.5756	0.55236	19.2569
	0.52097	5.589	0.52097	18.151				0.55264	5.5747	0.55264	19.2486
	0.52125	5.588	0.52125	18.1265				0.55292	5.5738	0.55292	19.2403
	0.52153	5.5871	0.52153	18.102				0.55319	5.573	0.55319	19.2318
	0.52181	5.5861	0.52181	18.0776				0.55347	5.5721	0.55347	19.2233
	0.52208	5.5851	0.52208	18.0532				0.55375	5.5712	0.55375	19.2147
	0.52236	5.5841	0.52236	18.0288				0.55403	5.5704	0.55403	19.206
	0.52264	5.5831	0.52264	18.0044				0.55431	5.5695	0.55431	19.1973
	0.52292	5.5821	0.52292	17.9799				0.55458	5.5686	0.55458	19.1884
	0.52319	5.5811	0.52319	17.9555				0.55486	5.5678	0.55486	19.1795
	0.52347	5.5801	0.52347	17.9312				0.55514	5.5669	0.55514	19.1705
	0.52375	5.5792	0.52375	17.9068				0.55542	5.5661	0.55542	19.1615
	0.52403	5.5782	0.52403	17.8824				0.55569	5.5652	0.55569	19.1524
	0.52431	5.5772	0.52431	17.8581				0.55597	5.5644	0.55597	19.1432
	0.52458	5.5763	0.52458	17.8337				0.55625	5.5635	0.55625	19.1339
	0.52486	5.5753	0.52486	17.8094				0.55653	5.5627	0.55653	19.1246
	0.52514	5.5743	0.52514	17.7851				0.55681	5.5618	0.55681	19.1152
	0.52542	5.5733	0.52542	17.7608				0.55708	5.561	0.55708	19.1057
	0.52569	5.5724	0.52569	17.7365				0.55736	5.5601	0.55736	19.0961
	0.52597	5.5714	0.52597	17.7122				0.55764	5.5593	0.55764	19.0865
	0.52625	5.5705	0.52625	17.6879				0.55792	5.5584	0.55792	19.0768
	0.52653	5.5695	0.52653	17.6637				0.55819	5.5576	0.55819	19.0671
	0.52681	5.5685	0.52681	17.6394				0.55847	5.5567	0.55847	19.0572
	0.52708	5.5676	0.52708	17.6152				0.55875	5.5559	0.55875	19.0473
	0.52736	5.5666	0.52736	17.591				0.55903	5.5551	0.55903	19.0374
	0.52764	5.5657	0.52764	17.5668				0.55931	5.5542	0.55931	19.0273
	0.52792	5.5647	0.52792	17.5426				0.55958	5.5534	0.55958	19.0172
	0.52819	5.5638	0.52819	17.5184				0.55986	5.5526	0.55986	19.0071
	0.52847	5.5629	0.52847	17.4943				0.56014	5.5518	0.56014	18.9968
	0.52875	5.5619	0.52875	17.4701				0.56042	5.5509	0.56042	18.9865
	0.52903	5.561	0.52903	17.446				0.56069	5.5501	0.56069	18.9761
	0.52931	5.56	0.52931	17.4219				0.56097	5.5493	0.56097	18.9657
	0.52958	5.5591	0.52958	17.3978				0.56125	5.5484	0.56125	18.9552
	0.52986	5.5582	0.52986	17.3737				0.56153	5.5476	0.56153	18.9446
	0.53014	5.5572	0.53014	17.3497				0.56181	5.5468	0.56181	18.934
	0.53042	5.5563	0.53042	17.3256				0.56208	5.546	0.56208	18.9233
	0.53069	5.5554	0.53069	17.3016				0.56236	5.5452	0.56236	18.9126
	0.53097	5.5544	0.53097	17.2776				0.56264	5.5443	0.56264	18.9018
	0.53125	5.5535	0.53125	17.2536				0.56292	5.5435	0.56292	18.8909
	0.53153	5.5526	0.53153	17.2296				0.56319	5.5427	0.56319	18.88
	0.53181	5.5517	0.53181	17.2057				0.56347	5.5419	0.56347	18.869
	0.53208	5.5508	0.53208	17.1817				0.56375	5.5411	0.56375	18.8579
	0.53236	5.5498	0.53236	17.1578				0.56403	5.5403	0.56403	18.8468
	0.53264	5.5489	0.53264	17.1339				0.56431	5.5395	0.56431	18.8356
	0.53292	5.548	0.53292	17.1101				0.56458	5.5387	0.56458	18.8244
	0.53319	5.5471	0.53319	17.0862				0.56486	5.5379	0.56486	18.8131
	0.53347	5.5462	0.53347	17.0624				0.56514	5.5371	0.56514	18.8017
	0.53375	5.5453	0.53375	17.0385				0.56542	5.5363	0.56542	18.7903
	0.53403	5.5444	0.53403	17.0147				0.56569	5.5355	0.56569	18.7788
	0.53431	5.5435	0.53431	16.9909				0.56597	5.5347	0.56597	18.7673
	0.53458	5.5426	0.53458	16.9672				0.56625	5.5339	0.56625	18.7557
	0.53486	5.5417	0.53486	16.9435				0.56653	5.5331	0.56653	18.744
	0.53514	5.5408	0.53514	16.9197				0.56681	5.5323	0.56681	18.7323
	0.53542	5.5399	0.53542	16.896				0.56708	5.5315	0.56708	18.7205
	0.53569	5.539	0.53569	16.8724				0.56736	5.5307	0.56736	18.7087
	0.53597	5.5381	0.53597	16.8487				0.56764	5.5299	0.56764	18.6968
	0.53625	5.5372	0.53625	16.8251				0.56792	5.5291	0.56792	18.6849
	0.53653	5.5363	0.53653	16.8014				0.56819	5.5283	0.56819	18.6729
	0.53681	5.5354	0.53681	16.7779				0.56847	5.5275	0.56847	18.6609
	0.53708	5.5345	0.53708	16.7543				0.56875	5.5267	0.56875	18.6488
	0.53736	5.5336	0.53736	16.7307				0.56903	5.526	0.56903	18.6366
	0.53764	5.5328	0.53764	16.7072				0.56931	5.5252	0.56931	18.6244
	0.53792	5.5319	0.53792	16.6837				0.56958	5.5244	0.56958	18.6122
	0.53819	5.531	0.53819	16.6602				0.56986	5.5236	0.56986	18.5999
	0.53847	5.5301	0.53847	16.6368				0.57014	5.5228	0.57014	18.5875
	0.53875	5.5292	0.53875	16.6133				0.57042	5.5221	0.57042	18.5751
	0.53903	5.5284	0.53903	16.5899				0.57069	5.5213	0.57069	18.5626
	0.53931	5.5275	0.53931	16.5665				0.57097	5.5205	0.57097	18.5501
	0.53958	5.5266	0.53958	16.5432				0.57125	5.5197	0.57125	18.5376
	0.53986	5.5258	0.53986	16.5198				0.57153	5.519	0.57153	18.5249
	0.54014	5.5249	0.54014	16.4965				0.57181	5.5182	0.57181	18.5123
	0.54042	5.524	0.54042	16.4732				0.57208	5.5174	0.57208	18.4996
	0.54069	5.5232	0.54069	16.45				0.57236	5.5167	0.57236	18.4868
	0.54097	5.5223	0.54097	16.4267				0.57264	5.5159	0.57264	18.474
	0.54125	5.5215	0.54125	16.4035				0.57292	5.5151	0.57292	18.4611
	0.54153	5.5206	0.54153	16.3803				0.57319	5.5144	0.57319	18.4482
	0.54181	5.5197	0.54181	16.3572				0.57347	5.5136	0.57347	18.4353
	0.54208	5.5189	0.54208	16.334				0.57375	5.5128	0.57375	18.4223
	0.54236	5.518	0.54236	16.3109				0.57403	5.5121	0.57403	18.4092
	0.54264	5.5172	0.54264	16.2878				0.57431	5.5113	0.57431	18.3961
	0.54292	5.5163	0.54292	16.2648				0.57458	5.5106	0.57458	18.383
	0.54319	5.5155	0.54319	16.2417				0.57486	5.5098	0.57486	18.3698
	0.54347	5.5146	0.54347	16.2187				0.57514	5.5091	0.57514	18.3565
	0.54375	5.5138	0.54375	16.1957				0.57542	5.5083	0.57542	18.3433
	0.54403	5.513	0.54403	16.1728				0.57569	5.5076	0.57569	18.3299
	0.54431	5.5121	0.54431	16.1499				0.57597	5.5068	0.57597	18.3166
	0.54458	5.5113	0.54458	16.127				0.57625	5.5061	0.57625	18.3032
	0.54486	5.5104	0.54486	16.1041				0.57653	5.5053	0.57653	18.2897
	0.54514	5.5096	0.54514	16.0812				0.57681	5.5046	0.57681	18.2762
	0.54542	5.5088	0.54542	16.0584				0.57708	5.5038	0.57708	18.2627
	0.54569	5.5079	0.54569	16.0356				0.57736	5.5031	0.57736	18.2491
	0.54597	5.5071	0.54597	16.0128				0.57764	5.5023	0.57764	18.2355
	0.54625	5.5063	0.54625	15.9901				0.57792	5.5016	0.57792	18.2218
	0.54653	5.5055	0.54653	15.9674				0.57819	5.5008	0.57819	18.2081
	0.54681	5.5046	0.54681	15.9447				0.57847	5.5001	0.57847	18.1943
	0.54708	5.5038	0.54708	15.922				0.57875	5.4994	0.57875	18.1805
	0.54736	5.503	0.54736	15.8994				0.57903	5.4986	0.57903	18.1667
	0.54764	5.5022	0.54764	15.8768				0.57931	5.4979	0.57931	18.1528
	0.54792	5.5013	0.54792	15.8542				0.57958	5.4972	0.57958	18.1389
	0.54819	5.5005	0.54819	15.8317				0.57986	5.4964	0.57986	18.125
	0.54847	5.4997	0.54847	15.8092				0.58014	5.4957	0.58014	18.111
	0.54875	5.4989	0.54875	15.7867				0.58042	5.495	0.58042	18.0969
	0.54903	5.4981	0.54903	15.7642				0.58069	5.4942	0.58069	18.0829
	0.54931	5.4973	0.54931	15.7418				0.58097	5.4935	0.58097	18.0688
	0.54958	5.4965	0.54958	15.7194				0.58125	5.4928	0.58125	18.0546
	0.54986	5.4957	0.54986	15.697				0.58153	5.4921	0.58153	18.0404
	0.55014	5.4949	0.55014	15.6747				0.58181	5.4913	0.58181	18.0262
	0.55042	5.4941	0.55042	15.6524				0.58208	5.4906	0.58208	18.012
	0.55069	5.4933	0.55069	15.6301				0.58236	5.4899	0.58236	17.9977
	0.55097	5.4925	0.55097	15.6078				0.58264	5.4892	0.58264	17.9834
	0.55125	5.4917	0.55125	15.5856				0.58292	5.4885	0.58292	17.969
	0.55153	5.4909	0.55153	15.5634				0.58319	5.4878	0.58319	17.9546
	0.55181	5.4901	0.55181	15.5413				0.58347	5.4871	0.58347	17.9402
	0.55208	5.4893	0.55208	15.5191				0.58375	5.4863	0.58375	17.9257
	0.55236	5.4885	0.55236	15.497				0.58403	5.4856	0.58403	17.9112
	0.55264	5.4877	0.55264	15.475				0.58431	5.4849	0.58431	17.8967
	0.55292	5.4869	0.55292	15.4529				0.58458	5.4842	0.58458	17.8822
	0.55319	5.4861	0.55319	15.4309				0.58486	5.4835	0.58486	17.8676
	0.55347	5.4853	0.55347	15.4089				0.58514	5.4828	0.58514	17.8529
	0.55375	5.4846	0.55375	15.387				0.58542	5.4821	0.58542	17.8383
	0.55403	5.4838	0.55403	15.365				0.58569	5.4814	0.58569	17.8236
	0.55431	5.483	0.55431	15.3432				0.58597	5.4807	0.58597	17.8089
	0.55458	5.4822	0.55458	15.3213				0.58625	5.48	0.58625	17.7941
	0.55486	5.4814	0.55486	15.2995				0.58653	5.4793	0.58653	17.7793
[truncated: 24,981 more rows]
